# Supplementary material for: Contrast Agent Dynamics Determine Radiomics Profiles in Oncologic Imaging
Source: MDPI journal article supplement (doi:10.3390/cancers16081519), 2024-04-16
Supplement: s1 [file s1]

**Table S4: Linear mixed model p values and cluster membership of all MRI radiomics features for pzPC tumors**

| Feature                                                    | F value  | p value  | FDR      | Cluster |
|------------------------------------------------------------|----------|----------|----------|---------|
| original_firstorder_90Percentile                           | 69,47609 | 1,07E-21 | 5,99E-19 | 1       |
| log-sigma-2-0-mm-3D_glcmlm_Idm                             | 69,89825 | 9,21E-22 | 5,99E-19 | 3       |
| log-sigma-2-0-mm-3D_glcmlm_Id                              | 64,01842 | 5,76E-21 | 2,15E-18 | 3       |
| log-sigma-2-0-mm-3D_firstorder_Entropy                     | 63,02263 | 7,94E-21 | 2,22E-18 | 1       |
| wavelet-LLH_glcmlm_Idm                                     | 61,81057 | 1,27E-20 | 2,37E-18 | 3       |
| wavelet-LLL_firstorder_90Percentile                        | 61,91743 | 1,18E-20 | 2,37E-18 | 1       |
| original_firstorder_Mean                                   | 58,05434 | 4,44E-20 | 6,2E-18  | 1       |
| original_firstorder_RootMeanSquared                        | 58,42168 | 3,9E-20  | 6,2E-18  | 1       |
| original_firstorder_Median                                 | 56,64438 | 7,33E-20 | 6,71E-18 | 1       |
| log-sigma-2-0-mm-3D_glszm_ZoneEntropy                      | 57,02776 | 6,48E-20 | 6,71E-18 | 1       |
| wavelet-LLH_firstorder_Entropy                             | 56,60559 | 7,8E-20  | 6,71E-18 | 1       |
| wavelet-LLL_firstorder_Median                              | 56,8411  | 6,84E-20 | 6,71E-18 | 1       |
| wavelet-LLL_firstorder_RootMeanSquared                     | 56,90395 | 6,68E-20 | 6,71E-18 | 1       |
| original_glrlm_GrayLevelNonUniformityNormalized            | 56,1764  | 8,51E-20 | 6,8E-18  | 3       |
| wavelet-LLL_firstorder_Mean                                | 56,02629 | 9,18E-20 | 6,84E-18 | 1       |
| wavelet-LLH_glcmlm_Id                                      | 55,69819 | 1,08E-19 | 7,55E-18 | 3       |
| log-sigma-2-0-mm-3D_glrlm_GrayLevelNonUniformityNormalized | 54,04089 | 1,8E-19  | 1,12E-17 | 3       |
| wavelet-LLL_firstorder_Maximum                             | 54,18471 | 1,81E-19 | 1,12E-17 | 1       |
| log-sigma-2-0-mm-3D_glcmlm_DifferenceEntropy               | 53,27027 | 2,54E-19 | 1,49E-17 | 1       |
| original_firstorder_Uniformity                             | 52,34588 | 3,56E-19 | 1,99E-17 | 3       |
| log-sigma-3-0-mm-3D_glcmlm_Idm                             | 51,98838 | 4,05E-19 | 2,16E-17 | 3       |
| log-sigma-3-0-mm-3D_glcmlm_Id                              | 50,90694 | 6,2E-19  | 3,15E-17 | 3       |
| original_firstorder_Maximum                                | 49,0485  | 1,34E-18 | 6,44E-17 | 1       |
| wavelet-LLH_glcmlm_DifferenceEntropy                       | 49,09891 | 1,38E-18 | 6,44E-17 | 1       |
| original_firstorder_Entropy                                | 48,31295 | 1,81E-18 | 8,1E-17  | 1       |
| log-sigma-3-0-mm-3D_firstorder_Entropy                     | 48,02772 | 2,05E-18 | 8,81E-17 | 1       |
| wavelet-LLH_glcmlm_JointEntropy                            | 47,78395 | 2,32E-18 | 9,6E-17  | 1       |
| log-sigma-2-0-mm-3D_glrlm_RunEntropy                       | 47,54083 | 2,54E-18 | 1,01E-16 | 1       |
| wavelet-LLH_glcmlm_SumEntropy                              | 47,43525 | 2,69E-18 | 1,04E-16 | 1       |
| log-sigma-3-0-mm-3D_glcmlm_DifferenceEntropy               | 47,07877 | 3,05E-18 | 1,07E-16 | 1       |
| wavelet-LLL_glcmlm_Id                                      | 47,03958 | 3,03E-18 | 1,07E-16 | 3       |
| wavelet-LLL_glrlm_RunEntropy                               | 47,17956 | 2,96E-18 | 1,07E-16 | 1       |
| wavelet-LLL_glszm_ZonePercentage                           | 46,78524 | 3,48E-18 | 1,18E-16 | 1       |
| wavelet-LLH_glrlm_RunLengthNonUniformityNormalized         | 45,43837 | 6,12E-18 | 2,01E-16 | 1       |
| original_glcmlm_Idm                                        | 44,96776 | 7,45E-18 | 2,38E-16 | 3       |
| wavelet-LLL_firstorder_Entropy                             | 44,35401 | 9,94E-18 | 3,01E-16 | 1       |
| wavelet-LLL_gldm_SmallDependenceEmphasis                   | 44,35754 | 9,95E-18 | 3,01E-16 | 1       |
| log-sigma-2-0-mm-3D_firstorder_Uniformity                  | 43,72652 | 1,24E-17 | 3,64E-16 | 3       |
| original_glcmlm_Id                                         | 43,11542 | 1,7E-17  | 4,76E-16 | 3       |
| log-sigma-2-0-mm-3D_glrlm_RunLengthNonUniformityNormalized | 43,19965 | 1,68E-17 | 4,76E-16 | 1       |
| wavelet-LLL_glcmlm_Idm                                     | 43,02896 | 1,76E-17 | 4,81E-16 | 3       |
| wavelet-LLH_glrlm_GrayLevelNonUniformityNormalized         | 43,09248 | 1,89E-17 | 5,04E-16 | 3       |
| original_glrlm_RunEntropy                                  | 42,67574 | 2,13E-17 | 5,55E-16 | 1       |

|                                                            |          |          |          |   |
|------------------------------------------------------------|----------|----------|----------|---|
| wavelet-LLH_firstorder_Uniformity                          | 41,90289 | 3,33E-17 | 8,45E-16 | 3 |
| log-sigma-2-0-mm-3D_glcmm_SumEntropy                       | 40,89633 | 4,89E-17 | 1,19E-15 | 1 |
| wavelet-LLL_firstorder_10Percentile                        | 40,87485 | 4,92E-17 | 1,19E-15 | 1 |
| wavelet-LLH_glrmm_RunPercentage                            | 40,60266 | 5,56E-17 | 1,32E-15 | 1 |
| log-sigma-2-0-mm-3D_glcmm_lmc2                             | 40,03437 | 7,39E-17 | 1,72E-15 | 1 |
| log-sigma-3-0-mm-3D_glrmm_GrayLevelNonUniformityNormalized | 39,89052 | 7,84E-17 | 1,79E-15 | 3 |
| wavelet-LLL_glszm_GrayLevelNonUniformityNormalized         | 39,63107 | 8,92E-17 | 1,99E-15 | 3 |
| log-sigma-3-0-mm-3D_glcmm_SumEntropy                       | 39,41408 | 1E-16    | 2,17E-15 | 1 |
| wavelet-LLH_glrmm_RunEntropy                               | 39,39225 | 1,02E-16 | 2,17E-15 | 1 |
| wavelet-LLL_glrmm_GrayLevelNonUniformityNormalized         | 39,3082  | 1,03E-16 | 2,17E-15 | 3 |
| log-sigma-3-0-mm-3D_glrmm_RunEntropy                       | 38,95926 | 1,26E-16 | 2,61E-15 | 1 |
| original_glcmm_DifferenceEntropy                           | 38,76168 | 1,37E-16 | 2,78E-15 | 1 |
| log-sigma-3-0-mm-3D_glrmm_RunLengthNonUniformityNormalized | 38,68686 | 1,41E-16 | 2,81E-15 | 1 |
| original_firstorder_10Percentile                           | 38,54152 | 1,53E-16 | 3E-15    | 1 |
| wavelet-LLL_firstorder_Uniformity                          | 38,43133 | 1,58E-16 | 3,05E-15 | 3 |
| log-sigma-3-0-mm-3D_glcmm_JointEntropy                     | 38,31396 | 1,72E-16 | 3,26E-15 | 1 |
| wavelet-LLL_glcmm_InverseVariance                          | 38,06806 | 1,89E-16 | 3,52E-15 | 3 |
| wavelet-LLL_glcmm_lmc1                                     | 37,66907 | 2,4E-16  | 4,4E-15  | 3 |
| log-sigma-2-0-mm-3D_glcmm_DifferenceAverage                | 37,51197 | 2,5E-16  | 4,51E-15 | 1 |
| log-sigma-2-0-mm-3D_glcmm_JointEntropy                     | 37,30305 | 2,87E-16 | 5,09E-15 | 1 |
| log-sigma-2-0-mm-3D_firstorder_Minimum                     | 36,9195  | 3,43E-16 | 6E-15    | 3 |
| log-sigma-2-0-mm-3D_firstorder_10Percentile                | 36,59708 | 3,94E-16 | 6,77E-15 | 3 |
| wavelet-LLL_glszm_ZoneEntropy                              | 36,50001 | 4,39E-16 | 7,43E-15 | 1 |
| log-sigma-3-0-mm-3D_glrmm_ShortRunEmphasis                 | 36,27658 | 4,79E-16 | 7,99E-15 | 1 |
| log-sigma-2-0-mm-3D_firstorder_Range                       | 35,74799 | 6,41E-16 | 1,04E-14 | 1 |
| log-sigma-3-0-mm-3D_firstorder_Uniformity                  | 35,74039 | 6,34E-16 | 1,04E-14 | 3 |
| log-sigma-2-0-mm-3D_glrmm_RunPercentage                    | 35,5998  | 6,99E-16 | 1,12E-14 | 1 |
| log-sigma-2-0-mm-3D_firstorder_MeanAbsoluteDeviation       | 35,17859 | 8,48E-16 | 1,32E-14 | 1 |
| wavelet-LLL_firstorder_Minimum                             | 35,23962 | 8,46E-16 | 1,32E-14 | 1 |
| wavelet-LLH_firstorder_MeanAbsoluteDeviation               | 35,00494 | 9,81E-16 | 1,5E-14  | 1 |
| wavelet-LLH_firstorder_10Percentile                        | 34,64779 | 1,11E-15 | 1,68E-14 | 3 |
| wavelet-LLH_firstorder_RobustMeanAbsoluteDeviation         | 34,65701 | 1,18E-15 | 1,76E-14 | 1 |
| log-sigma-2-0-mm-3D_glszm_GrayLevelNonUniformityNormalized | 34,26341 | 1,38E-15 | 2,02E-14 | 3 |
| log-sigma-3-0-mm-3D_firstorder_10Percentile                | 34,29313 | 1,39E-15 | 2,02E-14 | 3 |
| wavelet-LLH_glrmm_ShortRunEmphasis                         | 34,0727  | 1,57E-15 | 2,25E-14 | 1 |
| wavelet-LLH_glszm_ZoneEntropy                              | 34,06717 | 1,61E-15 | 2,28E-14 | 1 |
| wavelet-LLH_glcmm_DifferenceAverage                        | 33,67042 | 2,03E-15 | 2,84E-14 | 1 |
| original_glcmm_InverseVariance                             | 33,52593 | 2,14E-15 | 2,96E-14 | 3 |
| log-sigma-2-0-mm-3D_firstorder_RobustMeanAbsoluteDeviation | 33,24799 | 2,43E-15 | 3,27E-14 | 1 |
| log-sigma-2-0-mm-3D_glrmm_ShortRunEmphasis                 | 33,30867 | 2,43E-15 | 3,27E-14 | 1 |
| log-sigma-3-0-mm-3D_glszm_ZoneEntropy                      | 33,19895 | 2,61E-15 | 3,47E-14 | 1 |
| original_firstorder_Minimum                                | 32,99457 | 2,91E-15 | 3,83E-14 | 1 |
| wavelet-LLH_firstorder_Minimum                             | 32,76205 | 3,32E-15 | 4,32E-14 | 3 |
| original_glrmm_RunLengthNonUniformityNormalized            | 32,73831 | 3,36E-15 | 4,32E-14 | 1 |
| wavelet-LLL_firstorder_MeanAbsoluteDeviation               | 32,63001 | 3,52E-15 | 4,47E-14 | 1 |
| log-sigma-3-0-mm-3D_firstorder_Minimum                     | 32,32186 | 4,24E-15 | 5,32E-14 | 3 |
| wavelet-LLL_glszm_SizeZoneNonUniformityNormalized          | 31,43018 | 7,07E-15 | 8,78E-14 | 1 |

|                                                            |          |          |          |   |
|------------------------------------------------------------|----------|----------|----------|---|
| log-sigma-3-0-mm-3D_glrIm_RunPercentage                    | 31,33368 | 7,51E-15 | 9,23E-14 | 1 |
| log-sigma-3-0-mm-3D_firstorder_MeanAbsoluteDeviation       | 31,09902 | 8,64E-15 | 1,05E-13 | 1 |
| original_glrIm_ShortRunEmphasis                            | 30,88291 | 9,87E-15 | 1,19E-13 | 1 |
| log-sigma-3-0-mm-3D_glszm_LowGrayLevelZoneEmphasis         | 30,79777 | 1,03E-14 | 1,23E-13 | 3 |
| original_glrIm_RunPercentage                               | 30,78757 | 1,05E-14 | 1,23E-13 | 1 |
| log-sigma-3-0-mm-3D_glcm_DifferenceAverage                 | 30,7181  | 1,07E-14 | 1,24E-13 | 1 |
| wavelet-LLL_glcm_DifferenceEntropy                         | 30,60851 | 1,17E-14 | 1,35E-13 | 1 |
| wavelet-LLL_firstorder_RobustMeanAbsoluteDeviation         | 30,47468 | 1,24E-14 | 1,41E-13 | 1 |
| wavelet-LHL_firstorder_Entropy                             | 30,09656 | 1,59E-14 | 1,79E-13 | 1 |
| wavelet-LLL_glrIm_RunLengthNonUniformityNormalized         | 29,83484 | 1,86E-14 | 2,08E-13 | 1 |
| log-sigma-3-0-mm-3D_firstorder_RobustMeanAbsoluteDeviation | 29,7317  | 1,97E-14 | 2,18E-13 | 1 |
| wavelet-HLL_glcm_Id                                        | 29,59979 | 2,12E-14 | 2,32E-13 | 3 |
| wavelet-LLH_firstorder_InterquartileRange                  | 29,16901 | 2,88E-14 | 3,12E-13 | 1 |
| wavelet-LHL_glrIm_RunEntropy                               | 29,07949 | 2,98E-14 | 3,21E-13 | 1 |
| wavelet-LLL_gldm_DependenceNonUniformityNormalized         | 28,99244 | 3,14E-14 | 3,34E-13 | 1 |
| log-sigma-2-0-mm-3D_glszm_ZonePercentage                   | 28,96461 | 3,17E-14 | 3,35E-13 | 1 |
| wavelet-LLL_firstorder_InterquartileRange                  | 28,90698 | 3,26E-14 | 3,4E-13  | 1 |
| wavelet-HLL_glcm_Idm                                       | 28,82827 | 3,42E-14 | 3,54E-13 | 3 |
| wavelet-HLL_glrIm_GrayLevelNonUniformityNormalized         | 28,58111 | 4,03E-14 | 4,13E-13 | 3 |
| wavelet-HLL_firstorder_Uniformity                          | 28,55975 | 4,08E-14 | 4,15E-13 | 3 |
| log-sigma-2-0-mm-3D_firstorder_InterquartileRange          | 28,47109 | 4,2E-14  | 4,22E-13 | 1 |
| wavelet-LLL_firstorder_Range                               | 28,50735 | 4,23E-14 | 4,22E-13 | 1 |
| original_glszm_ZoneEntropy                                 | 28,34262 | 4,75E-14 | 4,69E-13 | 1 |
| log-sigma-4-0-mm-3D_firstorder_10Percentile                | 28,25903 | 4,95E-14 | 4,85E-13 | 3 |
| log-sigma-2-0-mm-3D_firstorder_Median                      | 28,04312 | 5,32E-14 | 5,14E-13 | 3 |
| log-sigma-3-0-mm-3D_glcm_Imc2                              | 28,06742 | 5,34E-14 | 5,14E-13 | 1 |
| wavelet-LLL_glrIm_ShortRunEmphasis                         | 28,02913 | 5,75E-14 | 5,49E-13 | 1 |
| log-sigma-3-0-mm-3D_firstorder_InterquartileRange          | 27,6709  | 7,31E-14 | 6,93E-13 | 1 |
| wavelet-LLH_glcm_JointAverage                              | 27,59769 | 7,69E-14 | 7,22E-13 | 1 |
| wavelet-HLH_glrIm_GrayLevelNonUniformityNormalized         | 27,57101 | 7,92E-14 | 7,38E-13 | 3 |
| log-sigma-3-0-mm-3D_glszm_GrayLevelNonUniformityNormalized | 27,36454 | 9,04E-14 | 8,35E-13 | 3 |
| log-sigma-4-0-mm-3D_glszm_ZoneEntropy                      | 27,23336 | 9,68E-14 | 8,87E-13 | 1 |
| log-sigma-2-0-mm-3D_firstorder_Mean                        | 26,94551 | 1,09E-13 | 9,85E-13 | 3 |
| log-sigma-3-0-mm-3D_firstorder_Mean                        | 27,01682 | 1,09E-13 | 9,85E-13 | 3 |
| log-sigma-3-0-mm-3D_firstorder_RootMeanSquared             | 26,95918 | 1,13E-13 | 1,01E-12 | 3 |
| wavelet-LLH_firstorder_Range                               | 26,97481 | 1,15E-13 | 1,02E-12 | 1 |
| log-sigma-2-0-mm-3D_firstorder_RootMeanSquared             | 26,62422 | 1,35E-13 | 1,19E-12 | 3 |
| wavelet-LLL_glszm_SmallAreaEmphasis                        | 26,64322 | 1,38E-13 | 1,21E-12 | 1 |
| wavelet-LLL_glrIm_RunPercentage                            | 26,66673 | 1,4E-13  | 1,21E-12 | 1 |
| wavelet-HLH_glrIm_RunEntropy                               | 26,49251 | 1,59E-13 | 1,37E-12 | 1 |
| log-sigma-4-0-mm-3D_firstorder_Minimum                     | 26,32129 | 1,76E-13 | 1,5E-12  | 3 |
| wavelet-LLL_glcm_JointAverage                              | 26,11326 | 2E-13    | 1,69E-12 | 1 |
| log-sigma-3-0-mm-3D_firstorder_Range                       | 26,03529 | 2,14E-13 | 1,8E-12  | 1 |
| wavelet-HLL_glcm_SumEntropy                                | 26,02657 | 2,17E-13 | 1,81E-12 | 1 |
| log-sigma-3-0-mm-3D_glcm_JointEnergy                       | 25,94065 | 2,23E-13 | 1,84E-12 | 3 |
| wavelet-HLL_firstorder_Entropy                             | 25,97655 | 2,22E-13 | 1,84E-12 | 1 |
| log-sigma-3-0-mm-3D_glcm_MaximumProbability                | 25,91708 | 2,25E-13 | 1,84E-12 | 3 |

|                                                            |          |          |          |   |
|------------------------------------------------------------|----------|----------|----------|---|
| original_glcm_SumEntropy                                   | 25,91118 | 2,34E-13 | 1,89E-12 | 1 |
| original_glcm_Imc1                                         | 25,88756 | 2,38E-13 | 1,92E-12 | 3 |
| original_firstorder_MeanAbsoluteDeviation                  | 25,73952 | 2,58E-13 | 2,04E-12 | 1 |
| log-sigma-3-0-mm-3D_firstorder_Median                      | 25,73083 | 2,56E-13 | 2,04E-12 | 3 |
| wavelet-LLL_glcm_DifferenceAverage                         | 25,69276 | 2,6E-13  | 2,05E-12 | 1 |
| wavelet-HLL_glrIm_RunLengthNonUniformityNormalized         | 25,4766  | 3,13E-13 | 2,45E-12 | 1 |
| wavelet-HLH_firstorder_Entropy                             | 25,44865 | 3,25E-13 | 2,53E-12 | 1 |
| wavelet-LLH_glcm_Imc2                                      | 25,35283 | 3,34E-13 | 2,58E-12 | 1 |
| wavelet-HLH_glcm_SumEntropy                                | 25,28044 | 3,65E-13 | 2,79E-12 | 1 |
| wavelet-HLL_glrIm_RunPercentage                            | 25,13619 | 3,97E-13 | 3,02E-12 | 1 |
| log-sigma-4-0-mm-3D_firstorder_RobustMeanAbsoluteDeviation | 25,12203 | 3,99E-13 | 3,02E-12 | 1 |
| log-sigma-5-0-mm-3D_firstorder_10Percentile                | 25,09387 | 4,08E-13 | 3,06E-12 | 3 |
| original_glszm_GrayLevelNonUniformityNormalized            | 25,05771 | 4,14E-13 | 3,07E-12 | 3 |
| log-sigma-4-0-mm-3D_glcm_Idm                               | 25,02187 | 4,17E-13 | 3,07E-12 | 3 |
| wavelet-HLH_glcm_JointEntropy                              | 25,0844  | 4,17E-13 | 3,07E-12 | 1 |
| original_glszm_ZonePercentage                              | 24,70817 | 5,37E-13 | 3,92E-12 | 1 |
| original_glcm_JointAverage                                 | 24,50444 | 6,08E-13 | 4,41E-12 | 1 |
| log-sigma-4-0-mm-3D_glcm_Id                                | 24,4279  | 6,3E-13  | 4,54E-12 | 3 |
| log-sigma-4-0-mm-3D_firstorder_Entropy                     | 24,15874 | 7,86E-13 | 5,63E-12 | 1 |
| wavelet-LHL_glcm_InverseVariance                           | 23,98779 | 8,91E-13 | 6,35E-12 | 3 |
| log-sigma-5-0-mm-3D_firstorder_Minimum                     | 23,95075 | 9,18E-13 | 6,5E-12  | 3 |
| log-sigma-4-0-mm-3D_firstorder_RootMeanSquared             | 23,91589 | 9,32E-13 | 6,56E-12 | 3 |
| log-sigma-4-0-mm-3D_firstorder_Mean                        | 23,90178 | 9,42E-13 | 6,58E-12 | 3 |
| log-sigma-2-0-mm-3D_gldm_DependenceNonUniformityNormalized | 23,86109 | 9,89E-13 | 6,87E-12 | 1 |
| log-sigma-4-0-mm-3D_glcm_JointEntropy                      | 23,76778 | 1,05E-12 | 7,2E-12  | 1 |
| wavelet-HLL_glrIm_ShortRunEmphasis                         | 23,76137 | 1,05E-12 | 7,2E-12  | 1 |
| log-sigma-4-0-mm-3D_firstorder_Median                      | 23,5944  | 1,18E-12 | 8,03E-12 | 3 |
| log-sigma-4-0-mm-3D_glcm_DifferenceEntropy                 | 23,55447 | 1,22E-12 | 8,27E-12 | 1 |
| log-sigma-4-0-mm-3D_firstorder_InterquartileRange          | 23,4992  | 1,27E-12 | 8,56E-12 | 1 |
| wavelet-LHL_glcm_Id                                        | 23,31654 | 1,45E-12 | 9,73E-12 | 3 |
| log-sigma-2-0-mm-3D_glcm_JointEnergy                       | 23,15269 | 1,57E-12 | 1,05E-11 | 3 |
| log-sigma-2-0-mm-3D_gldm_SmallDependenceEmphasis           | 23,08724 | 1,69E-12 | 1,11E-11 | 1 |
| wavelet-LHL_glrIm_GrayLevelNonUniformityNormalized         | 23,06649 | 1,74E-12 | 1,15E-11 | 3 |
| original_glcm_JointEnergy                                  | 22,99186 | 1,85E-12 | 1,21E-11 | 3 |
| original_glcm_MaximumProbability                           | 22,89141 | 1,99E-12 | 1,29E-11 | 3 |
| log-sigma-4-0-mm-3D_firstorder_MeanAbsoluteDeviation       | 22,80746 | 2,12E-12 | 1,37E-11 | 1 |
| original_firstorder_RobustMeanAbsoluteDeviation            | 22,71442 | 2,24E-12 | 1,44E-11 | 1 |
| wavelet-HHL_firstorder_Entropy                             | 22,64756 | 2,4E-12  | 1,53E-11 | 1 |
| log-sigma-4-0-mm-3D_glcm_SumEntropy                        | 22,61173 | 2,46E-12 | 1,56E-11 | 1 |
| wavelet-HLH_firstorder_90Percentile                        | 22,39955 | 2,9E-12  | 1,83E-11 | 1 |
| wavelet-LLH_glszm_ZonePercentage                           | 22,25512 | 3,19E-12 | 2E-11    | 1 |
| wavelet-HLH_glszm_ZoneEntropy                              | 22,26515 | 3,21E-12 | 2E-11    | 1 |
| log-sigma-5-0-mm-3D_firstorder_RootMeanSquared             | 22,17768 | 3,39E-12 | 2,1E-11  | 3 |
| wavelet-LHL_glszm_GrayLevelNonUniformityNormalized         | 22,18397 | 3,4E-12  | 2,1E-11  | 3 |
| wavelet-LLH_glrIm_LongRunEmphasis                          | 22,11954 | 3,53E-12 | 2,16E-11 | 3 |
| wavelet-HLL_firstorder_10Percentile                        | 22,10992 | 3,54E-12 | 2,16E-11 | 3 |
| log-sigma-5-0-mm-3D_firstorder_Mean                        | 22,09554 | 3,61E-12 | 2,19E-11 | 3 |

|                                                            |          |          |          |   |
|------------------------------------------------------------|----------|----------|----------|---|
| log-sigma-4-0-mm-3D_glrlm_RunLengthNonUniformityNormalized | 21,87512 | 4,2E-12  | 2,54E-11 | 1 |
| original_glcm_DifferenceAverage                            | 21,71589 | 4,77E-12 | 2,87E-11 | 1 |
| wavelet-LHL_glcm_Idm                                       | 21,71644 | 4,84E-12 | 2,9E-11  | 3 |
| wavelet-HLL_glszm_ZonePercentage                           | 21,68914 | 4,94E-12 | 2,94E-11 | 1 |
| original_firstorder_Range                                  | 21,66284 | 5,03E-12 | 2,98E-11 | 1 |
| wavelet-LLL_glcm_MaximumProbability                        | 21,60235 | 5,32E-12 | 3,13E-11 | 3 |
| log-sigma-5-0-mm-3D_firstorder_Median                      | 21,43104 | 6,03E-12 | 3,53E-11 | 3 |
| log-sigma-4-0-mm-3D_glcm_DifferenceAverage                 | 21,38425 | 6,21E-12 | 3,62E-11 | 1 |
| wavelet-HLL_glcm_DifferenceEntropy                         | 21,38496 | 6,3E-12  | 3,65E-11 | 1 |
| log-sigma-3-0-mm-3D_glcm_JointAverage                      | 21,37013 | 6,36E-12 | 3,66E-11 | 1 |
| log-sigma-3-0-mm-3D_glszm_ZonePercentage                   | 21,35378 | 6,38E-12 | 3,66E-11 | 1 |
| log-sigma-2-0-mm-3D_glcm_MaximumProbability                | 21,13024 | 7,29E-12 | 4,16E-11 | 3 |
| wavelet-LHL_firstorder_Uniformity                          | 21,05211 | 8,12E-12 | 4,61E-11 | 3 |
| wavelet-HLH_glcm_DifferenceEntropy                         | 20,99512 | 8,63E-12 | 4,88E-11 | 1 |
| wavelet-LLL_glcm_JointEnergy                               | 20,90151 | 9,25E-12 | 5,2E-11  | 3 |
| log-sigma-2-0-mm-3D_glcm_JointAverage                      | 20,73143 | 1,05E-11 | 5,87E-11 | 1 |
| wavelet-LHL_glcm_DifferenceEntropy                         | 20,66073 | 1,12E-11 | 6,23E-11 | 1 |
| log-sigma-5-0-mm-3D_glcm_Idm                               | 20,67223 | 1,14E-11 | 6,32E-11 | 3 |
| wavelet-HLL_glrlm_LongRunEmphasis                          | 20,60217 | 1,17E-11 | 6,42E-11 | 3 |
| wavelet-LLL_glrlm_LongRunEmphasis                          | 20,56474 | 1,2E-11  | 6,58E-11 | 3 |
| wavelet-LLH_gldm_LargeDependenceEmphasis                   | 20,54786 | 1,21E-11 | 6,58E-11 | 3 |
| wavelet-LLL_gldm_DependenceEntropy                         | 20,53146 | 1,24E-11 | 6,75E-11 | 1 |
| wavelet-HLH_firstorder_MeanAbsoluteDeviation               | 20,49297 | 1,29E-11 | 6,94E-11 | 1 |
| wavelet-HHL_firstorder_Uniformity                          | 20,48001 | 1,29E-11 | 6,94E-11 | 3 |
| original_glrlm_LongRunEmphasis                             | 20,45575 | 1,31E-11 | 7,02E-11 | 3 |
| log-sigma-2-0-mm-3D_glszm_LowGrayLevelZoneEmphasis         | 20,4097  | 1,33E-11 | 7,07E-11 | 3 |
| wavelet-HLH_firstorder_RobustMeanAbsoluteDeviation         | 20,39991 | 1,39E-11 | 7,39E-11 | 1 |
| wavelet-LHL_glszm_ZonePercentage                           | 20,36946 | 1,41E-11 | 7,44E-11 | 1 |
| wavelet-LHL_glcm_SumEntropy                                | 20,34418 | 1,44E-11 | 7,58E-11 | 1 |
| wavelet-HLH_firstorder_Uniformity                          | 20,22161 | 1,63E-11 | 8,49E-11 | 3 |
| log-sigma-5-0-mm-3D_glcm_Id                                | 20,09902 | 1,82E-11 | 9,44E-11 | 3 |
| log-sigma-2-0-mm-3D_glcm_Imc1                              | 19,89699 | 2,08E-11 | 1,07E-10 | 3 |
| wavelet-HLL_glrlm_RunEntropy                               | 19,77881 | 2,28E-11 | 1,18E-10 | 1 |
| log-sigma-3-0-mm-3D_gldm_SmallDependenceEmphasis           | 19,64281 | 2,51E-11 | 1,29E-10 | 1 |
| wavelet-HHL_glcm_Id                                        | 19,47932 | 2,93E-11 | 1,5E-10  | 3 |
| original_glcm_Imc2                                         | 19,35039 | 3,26E-11 | 1,66E-10 | 1 |
| original_firstorder_InterquartileRange                     | 19,25991 | 3,46E-11 | 1,75E-10 | 1 |
| wavelet-LLL_glcm_SumEntropy                                | 19,20372 | 3,7E-11  | 1,86E-10 | 1 |
| wavelet-HHL_glrlm_GrayLevelNonUniformityNormalized         | 18,99703 | 4,39E-11 | 2,2E-10  | 3 |
| log-sigma-4-0-mm-3D_glrlm_ShortRunEmphasis                 | 18,95345 | 4,43E-11 | 2,21E-10 | 1 |
| original_gldm_SmallDependenceEmphasis                      | 18,93838 | 4,6E-11  | 2,29E-10 | 1 |
| original_glcm_JointEntropy                                 | 18,76134 | 5,37E-11 | 2,66E-10 | 1 |
| wavelet-LHL_firstorder_10Percentile                        | 18,71027 | 5,56E-11 | 2,73E-10 | 3 |
| wavelet-HHL_glcm_Idm                                       | 18,71759 | 5,57E-11 | 2,73E-10 | 3 |
| wavelet-LLH_glcm_MaximumProbability                        | 18,75829 | 5,8E-11  | 2,83E-10 | 3 |
| wavelet-HLH_glcm_JointEnergy                               | 18,69313 | 5,82E-11 | 2,83E-10 | 3 |
| wavelet-HLH_glszm_ZonePercentage                           | 18,65488 | 5,84E-11 | 2,83E-10 | 1 |

|                                                            |          |          |          |   |
|------------------------------------------------------------|----------|----------|----------|---|
| log-sigma-5-0-mm-3D_glcM_DifferenceEntropy                 | 18,64795 | 5,92E-11 | 2,85E-10 | 1 |
| log-sigma-4-0-mm-3D_glrIm_RunPercentage                    | 18,56459 | 6,26E-11 | 3E-10    | 1 |
| log-sigma-3-0-mm-3D_gldm_DependenceNonUniformityNormalized | 18,55369 | 6,33E-11 | 3,02E-10 | 1 |
| log-sigma-2-0-mm-3D_glrIm_LongRunLowGrayLevelEmphasis      | 18,50111 | 6,61E-11 | 3,13E-10 | 3 |
| wavelet-LLH_glszm_GrayLevelNonUniformityNormalized         | 18,54364 | 6,6E-11  | 3,13E-10 | 3 |
| log-sigma-5-0-mm-3D_glcM_DifferenceAverage                 | 18,43276 | 7,19E-11 | 3,39E-10 | 1 |
| wavelet-HHL_glrIm_RunEntropy                               | 18,39838 | 7,35E-11 | 3,45E-10 | 1 |
| wavelet-HLH_glrIm_ShortRunEmphasis                         | 18,30649 | 7,9E-11  | 3,7E-10  | 1 |
| wavelet-HLL_firstorder_RobustMeanAbsoluteDeviation         | 18,20602 | 8,53E-11 | 3,96E-10 | 1 |
| wavelet-HLL_glcM_DifferenceAverage                         | 18,20389 | 8,54E-11 | 3,96E-10 | 1 |
| wavelet-HLL_firstorder_MeanAbsoluteDeviation               | 18,18043 | 8,74E-11 | 4,04E-10 | 1 |
| log-sigma-5-0-mm-3D_firstorder_Entropy                     | 18,12311 | 9,35E-11 | 4,3E-10  | 1 |
| log-sigma-5-0-mm-3D_glcM_JointEntropy                      | 18,09477 | 9,57E-11 | 4,39E-10 | 1 |
| log-sigma-5-0-mm-3D_glrIm_ShortRunEmphasis                 | 18,06292 | 9,63E-11 | 4,39E-10 | 1 |
| wavelet-LLH_gldm_SmallDependenceEmphasis                   | 18,05579 | 9,8E-11  | 4,45E-10 | 1 |
| log-sigma-5-0-mm-3D_glrIm_RunLengthNonUniformityNormalized | 17,98021 | 1,04E-10 | 4,71E-10 | 1 |
| wavelet-HLL_glcM_Imc2                                      | 17,92684 | 1,11E-10 | 4,99E-10 | 1 |
| wavelet-HLL_glrIm_RunVariance                              | 17,91771 | 1,11E-10 | 5E-10    | 3 |
| log-sigma-2-0-mm-3D_gldm_GrayLevelVariance                 | 17,81128 | 1,2E-10  | 5,38E-10 | 1 |
| log-sigma-4-0-mm-3D_firstorder_Range                       | 17,81933 | 1,22E-10 | 5,41E-10 | 1 |
| log-sigma-4-0-mm-3D_glrIm_RunEntropy                       | 17,68146 | 1,38E-10 | 6,11E-10 | 1 |
| wavelet-HHL_glcM_JointEntropy                              | 17,66972 | 1,39E-10 | 6,16E-10 | 1 |
| log-sigma-2-0-mm-3D_glrIm_GrayLevelVariance                | 17,62657 | 1,42E-10 | 6,25E-10 | 1 |
| log-sigma-2-0-mm-3D_firstorder_Variance                    | 17,54727 | 1,52E-10 | 6,68E-10 | 1 |
| wavelet-LLH_glrIm_GrayLevelVariance                        | 17,51117 | 1,61E-10 | 7,03E-10 | 1 |
| wavelet-LHL_glrIm_RunPercentage                            | 17,49545 | 1,62E-10 | 7,05E-10 | 1 |
| wavelet-LLH_glrIm_RunVariance                              | 17,46545 | 1,66E-10 | 7,19E-10 | 3 |
| wavelet-HLL_glszm_ZoneEntropy                              | 17,43151 | 1,72E-10 | 7,44E-10 | 1 |
| log-sigma-2-0-mm-3D_glcM_SumSquares                        | 17,39997 | 1,74E-10 | 7,47E-10 | 1 |
| wavelet-LLH_firstorder_Variance                            | 17,39912 | 1,78E-10 | 7,63E-10 | 1 |
| wavelet-LLH_gldm_GrayLevelVariance                         | 17,33853 | 1,88E-10 | 8,02E-10 | 1 |
| wavelet-LHL_glrIm_RunLengthNonUniformityNormalized         | 17,27052 | 1,98E-10 | 8,43E-10 | 1 |
| wavelet-LHL_glrIm_ShortRunEmphasis                         | 17,21607 | 2,08E-10 | 8,81E-10 | 1 |
| wavelet-LHH_glszm_ZoneEntropy                              | 17,17676 | 2,17E-10 | 9,16E-10 | 1 |
| wavelet-LLL_glrIm_LongRunLowGrayLevelEmphasis              | 17,07821 | 2,35E-10 | 9,88E-10 | 3 |
| wavelet-LHL_glszm_ZoneEntropy                              | 17,08034 | 2,37E-10 | 9,91E-10 | 1 |
| log-sigma-4-0-mm-3D_glszm_LowGrayLevelZoneEmphasis         | 17,06499 | 2,38E-10 | 9,94E-10 | 3 |
| wavelet-LHH_glrIm_RunEntropy                               | 16,96171 | 2,64E-10 | 1,1E-09  | 1 |
| log-sigma-2-0-mm-3D_glszm_GrayLevelVariance                | 16,92691 | 2,68E-10 | 1,11E-09 | 1 |
| log-sigma-4-0-mm-3D_firstorder_Uniformity                  | 16,88931 | 2,74E-10 | 1,13E-09 | 3 |
| log-sigma-4-0-mm-3D_gldm_DependenceNonUniformityNormalized | 16,90308 | 2,77E-10 | 1,14E-09 | 1 |
| wavelet-HLL_firstorder_InterquartileRange                  | 16,84861 | 2,87E-10 | 1,18E-09 | 1 |
| wavelet-LLL_glrIm_RunVariance                              | 16,85659 | 2,88E-10 | 1,18E-09 | 3 |
| wavelet-HHL_glcM_SumEntropy                                | 16,76885 | 3,14E-10 | 1,28E-09 | 1 |
| wavelet-LLH_glszm_GrayLevelVariance                        | 16,75136 | 3,19E-10 | 1,29E-09 | 1 |
| wavelet-HLL_gldm_SmallDependenceEmphasis                   | 16,72174 | 3,24E-10 | 1,31E-09 | 1 |
| log-sigma-4-0-mm-3D_glszm_ZonePercentage                   | 16,67394 | 3,36E-10 | 1,35E-09 | 1 |

|                                                              |          |          |          |   |
|--------------------------------------------------------------|----------|----------|----------|---|
| wavelet-LLL_gldm_LowGrayLevelEmphasis                        | 16,69512 | 3,35E-10 | 1,35E-09 | 3 |
| wavelet-LHL_firstorder_Range                                 | 16,66609 | 3,45E-10 | 1,38E-09 | 1 |
| log-sigma-4-0-mm-3D_glrlm_GrayLevelNonUniformityNormalized   | 16,63308 | 3,5E-10  | 1,39E-09 | 3 |
| wavelet-LLL_glrlm_LowGrayLevelRunEmphasis                    | 16,64826 | 3,5E-10  | 1,39E-09 | 3 |
| log-sigma-5-0-mm-3D_firstorder_90Percentile                  | 16,59219 | 3,62E-10 | 1,43E-09 | 3 |
| wavelet-LLL_glrlm_ShortRunLowGrayLevelEmphasis               | 16,44507 | 4,23E-10 | 1,66E-09 | 3 |
| wavelet-LHL_firstorder_Minimum                               | 16,39019 | 4,45E-10 | 1,74E-09 | 3 |
| log-sigma-5-0-mm-3D_glrlm_RunPercentage                      | 16,33274 | 4,62E-10 | 1,8E-09  | 1 |
| wavelet-HLL_gldm_JointEntropy                                | 16,35172 | 4,63E-10 | 1,8E-09  | 1 |
| wavelet-HLL_gldm_LargeDependenceEmphasis                     | 16,32207 | 4,73E-10 | 1,84E-09 | 3 |
| wavelet-HLH_firstorder_InterquartileRange                    | 16,32216 | 4,78E-10 | 1,85E-09 | 1 |
| log-sigma-4-0-mm-3D_gldm_JointAverage                        | 16,24855 | 5,08E-10 | 1,96E-09 | 1 |
| log-sigma-2-0-mm-3D_glrlm_LongRunEmphasis                    | 16,22114 | 5,2E-10  | 2E-09    | 3 |
| wavelet-HLH_gldm_Idm                                         | 16,10596 | 5,91E-10 | 2,26E-09 | 3 |
| wavelet-HLH_glrlm_RunPercentage                              | 16,06384 | 6,04E-10 | 2,3E-09  | 1 |
| wavelet-LLH_glszm_LowGrayLevelZoneEmphasis                   | 15,93547 | 6,84E-10 | 2,6E-09  | 3 |
| log-sigma-2-0-mm-3D_gldm_Contrast                            | 15,87952 | 7,05E-10 | 2,67E-09 | 1 |
| wavelet-HLL_gldm_Imc1                                        | 15,88221 | 7,21E-10 | 2,72E-09 | 3 |
| wavelet-LLH_glrlm_ShortRunHighGrayLevelEmphasis              | 15,85382 | 7,4E-10  | 2,79E-09 | 1 |
| log-sigma-2-0-mm-3D_gldm_ClusterTendency                     | 15,8055  | 7,64E-10 | 2,87E-09 | 1 |
| original_glrlm_RunVariance                                   | 15,6844  | 8,67E-10 | 3,23E-09 | 3 |
| wavelet-LHL_firstorder_Median                                | 15,6795  | 8,65E-10 | 3,23E-09 | 3 |
| wavelet-LHL_gldm_SmallDependenceEmphasis                     | 15,64578 | 9E-10    | 3,34E-09 | 1 |
| wavelet-HLH_gldm_Id                                          | 15,66048 | 9,04E-10 | 3,35E-09 | 3 |
| log-sigma-5-0-mm-3D_gldm_SumEntropy                          | 15,60818 | 9,37E-10 | 3,46E-09 | 1 |
| wavelet-LHH_firstorder_Entropy                               | 15,57106 | 9,73E-10 | 3,58E-09 | 1 |
| wavelet-LLH_gldm_Contrast                                    | 15,55914 | 9,83E-10 | 3,6E-09  | 1 |
| wavelet-LLH_gldm_HighGrayLevelEmphasis                       | 15,52307 | 1,02E-09 | 3,71E-09 | 1 |
| log-sigma-2-0-mm-3D_gldm_LargeDependenceEmphasis             | 15,49702 | 1,04E-09 | 3,78E-09 | 3 |
| wavelet-HLH_glrlm_RunLengthNonUniformityNormalized           | 15,4879  | 1,05E-09 | 3,8E-09  | 1 |
| wavelet-LLH_glrlm_HighGrayLevelRunEmphasis                   | 15,42932 | 1,11E-09 | 4,03E-09 | 1 |
| log-sigma-2-0-mm-3D_gldm_LargeDependenceLowGrayLevelEmphasis | 14,11987 | 1,19E-09 | 4,28E-09 | 3 |
| wavelet-HLH_gldm_SmallDependenceEmphasis                     | 15,30624 | 1,25E-09 | 4,48E-09 | 1 |
| log-sigma-3-0-mm-3D_gldm_SumSquares                          | 15,26884 | 1,29E-09 | 4,61E-09 | 1 |
| log-sigma-3-0-mm-3D_gldm_GrayLevelVariance                   | 15,26796 | 1,29E-09 | 4,61E-09 | 1 |
| wavelet-LHH_glrlm_GrayLevelNonUniformityNormalized           | 15,26896 | 1,31E-09 | 4,65E-09 | 3 |
| wavelet-LHH_gldm_SumEntropy                                  | 15,18472 | 1,42E-09 | 5,03E-09 | 1 |
| log-sigma-3-0-mm-3D_glrlm_GrayLevelVariance                  | 15,16751 | 1,42E-09 | 5,04E-09 | 1 |
| wavelet-HHL_gldm_DifferenceEntropy                           | 15,14359 | 1,47E-09 | 5,19E-09 | 1 |
| wavelet-LLH_gldm_DependenceNonUniformityNormalized           | 15,11792 | 1,5E-09  | 5,27E-09 | 1 |
| wavelet-LHL_glrlm_LongRunEmphasis                            | 15,12008 | 1,5E-09  | 5,27E-09 | 3 |
| log-sigma-2-0-mm-3D_gldm_DifferenceVariance                  | 15,0908  | 1,52E-09 | 5,31E-09 | 1 |
| wavelet-HLL_gldm_InverseVariance                             | 15,07275 | 1,55E-09 | 5,38E-09 | 3 |
| wavelet-LLH_gldm_SumSquares                                  | 15,06978 | 1,58E-09 | 5,5E-09  | 1 |
| log-sigma-3-0-mm-3D_firstorder_Variance                      | 15,02266 | 1,64E-09 | 5,68E-09 | 1 |
| log-sigma-3-0-mm-3D_glszm_GrayLevelVariance                  | 15,01093 | 1,66E-09 | 5,72E-09 | 1 |
| wavelet-LHL_gldm_Imc1                                        | 15,02013 | 1,66E-09 | 5,72E-09 | 3 |

|                                                            |          |          |          |   |
|------------------------------------------------------------|----------|----------|----------|---|
| wavelet-HHL_glrIm_RunPercentage                            | 14,99585 | 1,7E-09  | 5,82E-09 | 1 |
| wavelet-LLL_glszm_GrayLevelVariance                        | 14,93802 | 1,78E-09 | 6,08E-09 | 1 |
| log-sigma-3-0-mm-3D_glrIm_ShortRunLowGrayLevelEmphasis     | 14,9306  | 1,8E-09  | 6,15E-09 | 3 |
| log-sigma-5-0-mm-3D_firstorder_MeanAbsoluteDeviation       | 14,92442 | 1,82E-09 | 6,19E-09 | 1 |
| wavelet-HHL_glcm_MaximumProbability                        | 14,9094  | 1,86E-09 | 6,3E-09  | 3 |
| original_gldm_LargeDependenceEmphasis                      | 14,79506 | 2,07E-09 | 6,98E-09 | 3 |
| original_gldm_DependenceNonUniformityNormalized            | 14,78975 | 2,08E-09 | 7,02E-09 | 1 |
| wavelet-HHL_glrIm_RunLengthNonUniformityNormalized         | 14,76727 | 2,13E-09 | 7,14E-09 | 1 |
| log-sigma-3-0-mm-3D_glrIm_LowGrayLevelRunEmphasis          | 14,71105 | 2,24E-09 | 7,48E-09 | 3 |
| wavelet-HLH_firstorder_Range                               | 14,61613 | 2,49E-09 | 8,3E-09  | 1 |
| wavelet-LLH_glcm_DifferenceVariance                        | 14,51427 | 2,77E-09 | 9,22E-09 | 1 |
| log-sigma-2-0-mm-3D_glszm_HighGrayLevelZoneEmphasis        | 14,48538 | 2,8E-09  | 9,29E-09 | 1 |
| wavelet-LLH_glcm_Imc1                                      | 14,39496 | 3,08E-09 | 1,02E-08 | 3 |
| log-sigma-3-0-mm-3D_glszm_HighGrayLevelZoneEmphasis        | 14,36578 | 3,17E-09 | 1,05E-08 | 1 |
| wavelet-HLL_glszm_GrayLevelNonUniformityNormalized         | 14,35754 | 3,19E-09 | 1,05E-08 | 3 |
| wavelet-HLH_glcm_Imc2                                      | 14,32857 | 3,29E-09 | 1,08E-08 | 1 |
| log-sigma-5-0-mm-3D_firstorder_Range                       | 14,27098 | 3,51E-09 | 1,15E-08 | 1 |
| wavelet-HHL_glrIm_ShortRunEmphasis                         | 14,26244 | 3,53E-09 | 1,15E-08 | 1 |
| wavelet-HLL_glcm_JointEnergy                               | 14,2007  | 3,78E-09 | 1,23E-08 | 3 |
| log-sigma-2-0-mm-3D_glcm_InverseVariance                   | 14,10585 | 3,99E-09 | 1,29E-08 | 3 |
| log-sigma-3-0-mm-3D_glcm_Contrast                          | 14,11367 | 4,07E-09 | 1,31E-08 | 1 |
| wavelet-HLH_glcm_DifferenceAverage                         | 14,09693 | 4,22E-09 | 1,36E-08 | 1 |
| log-sigma-2-0-mm-3D_glrIm_LowGrayLevelRunEmphasis          | 14,08211 | 4,24E-09 | 1,36E-08 | 3 |
| wavelet-LLL_glrIm_GrayLevelVariance                        | 14,03842 | 4,4E-09  | 1,41E-08 | 1 |
| wavelet-LLL_glszm_LowGrayLevelZoneEmphasis                 | 14,01656 | 4,52E-09 | 1,44E-08 | 3 |
| log-sigma-5-0-mm-3D_glszm_ZoneEntropy                      | 14,00816 | 4,6E-09  | 1,46E-08 | 1 |
| wavelet-LLL_firstorder_Variance                            | 13,98467 | 4,66E-09 | 1,48E-08 | 1 |
| wavelet-LLL_gldm_GrayLevelVariance                         | 13,95214 | 4,81E-09 | 1,52E-08 | 1 |
| log-sigma-4-0-mm-3D_glcm_MaximumProbability                | 13,91849 | 4,9E-09  | 1,55E-08 | 3 |
| wavelet-LLH_glszm_HighGrayLevelZoneEmphasis                | 13,8736  | 5,28E-09 | 1,66E-08 | 1 |
| log-sigma-3-0-mm-3D_glcm_ClusterTendency                   | 13,84541 | 5,4E-09  | 1,7E-08  | 1 |
| wavelet-LLH_glcm_ClusterTendency                           | 13,82156 | 5,58E-09 | 1,75E-08 | 1 |
| wavelet-LLH_glcm_JointEnergy                               | 13,83085 | 5,89E-09 | 1,84E-08 | 3 |
| wavelet-LLH_glcm_Autocorrelation                           | 13,70889 | 6,26E-09 | 1,95E-08 | 1 |
| wavelet-HHL_glcm_JointEnergy                               | 13,70178 | 6,33E-09 | 1,97E-08 | 3 |
| wavelet-LHH_glcm_JointEntropy                              | 13,62216 | 6,88E-09 | 2,13E-08 | 1 |
| log-sigma-5-0-mm-3D_firstorder_RobustMeanAbsoluteDeviation | 13,53279 | 7,51E-09 | 2,32E-08 | 1 |
| wavelet-HLH_glrIm_LongRunEmphasis                          | 13,50464 | 7,74E-09 | 2,38E-08 | 3 |
| log-sigma-5-0-mm-3D_gldm_DependenceNonUniformityNormalized | 13,47224 | 7,92E-09 | 2,43E-08 | 1 |
| wavelet-LHL_glcm_JointEntropy                              | 13,39699 | 8,7E-09  | 2,66E-08 | 1 |
| wavelet-HLL_firstorder_Minimum                             | 13,3784  | 8,81E-09 | 2,69E-08 | 3 |
| wavelet-HHL_glszm_ZoneEntropy                              | 13,28141 | 9,83E-09 | 2,99E-08 | 1 |
| wavelet-HLH_glcm_JointAverage                              | 13,24961 | 1,02E-08 | 3,09E-08 | 1 |
| wavelet-LLL_glcm_SumSquares                                | 13,22069 | 1,04E-08 | 3,14E-08 | 1 |
| wavelet-LHL_glcm_JointAverage                              | 13,21205 | 1,05E-08 | 3,18E-08 | 1 |
| wavelet-LHL_firstorder_MeanAbsoluteDeviation               | 13,12831 | 1,15E-08 | 3,47E-08 | 1 |
| log-sigma-4-0-mm-3D_gldm_SmallDependenceEmphasis           | 13,10204 | 1,16E-08 | 3,49E-08 | 1 |



|                                                            |          |          |          |   |
|------------------------------------------------------------|----------|----------|----------|---|
| log-sigma-3-0-mm-3D_glrIm_ShortRunHighGrayLevelEmphasis    | 13,05476 | 1,24E-08 | 3,73E-08 | 1 |
| wavelet-HLL_glcM_MaximumProbability                        | 13,04326 | 1,26E-08 | 3,78E-08 | 3 |
| log-sigma-2-0-mm-3D_glrIm_ShortRunHighGrayLevelEmphasis    | 12,96819 | 1,36E-08 | 4,06E-08 | 1 |
| log-sigma-3-0-mm-3D_glrIm_HighGrayLevelRunEmphasis         | 12,93688 | 1,41E-08 | 4,2E-08  | 1 |
| wavelet-HHL_glcM_DifferenceAverage                         | 12,93189 | 1,43E-08 | 4,23E-08 | 1 |
| wavelet-LHH_firstorder_Uniformity                          | 12,92858 | 1,44E-08 | 4,25E-08 | 3 |
| wavelet-HHL_glrIm_LongRunEmphasis                          | 12,91713 | 1,45E-08 | 4,26E-08 | 3 |
| wavelet-LHH_glcM_DifferenceEntropy                         | 12,91578 | 1,46E-08 | 4,29E-08 | 1 |
| wavelet-LLH_glrIm_LongRunHighGrayLevelEmphasis             | 12,90559 | 1,47E-08 | 4,31E-08 | 1 |
| log-sigma-3-0-mm-3D_gldm_LargeDependenceEmphasis           | 12,87052 | 1,51E-08 | 4,42E-08 | 3 |
| original_glrIm_GrayLevelVariance                           | 12,7169  | 1,78E-08 | 5,19E-08 | 1 |
| original_gldm_GrayLevelVariance                            | 12,6995  | 1,81E-08 | 5,27E-08 | 1 |
| original_glrIm_LongRunHighGrayLevelEmphasis                | 12,69154 | 1,83E-08 | 5,3E-08  | 1 |
| log-sigma-4-0-mm-3D_glrIm_LowGrayLevelRunEmphasis          | 12,69885 | 1,83E-08 | 5,3E-08  | 3 |
| wavelet-HHL_glcM_InverseVariance                           | 12,69757 | 1,84E-08 | 5,3E-08  | 3 |
| log-sigma-3-0-mm-3D_glcM_Idn                               | 12,68791 | 1,85E-08 | 5,33E-08 | 3 |
| log-sigma-2-0-mm-3D_gldm_LowGrayLevelEmphasis              | 12,66636 | 1,9E-08  | 5,44E-08 | 3 |
| log-sigma-3-0-mm-3D_gldm_HighGrayLevelEmphasis             | 12,66514 | 1,9E-08  | 5,44E-08 | 1 |
| log-sigma-4-0-mm-3D_firstorder_90Percentile                | 12,63482 | 1,93E-08 | 5,53E-08 | 3 |
| log-sigma-2-0-mm-3D_glrIm_HighGrayLevelRunEmphasis         | 12,58765 | 2,06E-08 | 5,86E-08 | 1 |
| log-sigma-5-0-mm-3D_glszm_LowGrayLevelZoneEmphasis         | 12,59384 | 2,06E-08 | 5,86E-08 | 3 |
| original_glszm_GrayLevelVariance                           | 12,56212 | 2,11E-08 | 5,98E-08 | 1 |
| wavelet-LLH_gldm_DependenceVariance                        | 12,52912 | 2,2E-08  | 6,21E-08 | 3 |
| wavelet-HHL_glcM_Imc2                                      | 12,53177 | 2,2E-08  | 6,21E-08 | 1 |
| wavelet-LHL_glrIm_RunVariance                              | 12,52261 | 2,22E-08 | 6,25E-08 | 3 |
| original_firstorder_Variance                               | 12,47842 | 2,31E-08 | 6,48E-08 | 1 |
| log-sigma-2-0-mm-3D_gldm_HighGrayLevelEmphasis             | 12,37625 | 2,6E-08  | 7,28E-08 | 1 |
| wavelet-HLL_firstorder_Range                               | 12,36475 | 2,64E-08 | 7,38E-08 | 1 |
| wavelet-LLL_glcM_ClusterTendency                           | 12,32149 | 2,76E-08 | 7,69E-08 | 1 |
| original_glszm_LowGrayLevelZoneEmphasis                    | 12,29823 | 2,81E-08 | 7,82E-08 | 3 |
| wavelet-LLL_gldm_LargeDependenceEmphasis                   | 12,24366 | 3,01E-08 | 8,36E-08 | 3 |
| log-sigma-5-0-mm-3D_firstorder_InterquartileRange          | 12,21965 | 3,11E-08 | 8,59E-08 | 1 |
| log-sigma-2-0-mm-3D_glrIm_ShortRunLowGrayLevelEmphasis     | 12,20813 | 3,14E-08 | 8,65E-08 | 3 |
| log-sigma-3-0-mm-3D_gldm_LowGrayLevelEmphasis              | 12,20386 | 3,14E-08 | 8,65E-08 | 3 |
| original_gldm_HighGrayLevelEmphasis                        | 12,173   | 3,23E-08 | 8,88E-08 | 1 |
| original_glrIm_HighGrayLevelRunEmphasis                    | 12,17082 | 3,24E-08 | 8,89E-08 | 1 |
| log-sigma-2-0-mm-3D_gldm_DependenceVariance                | 12,11653 | 3,49E-08 | 9,53E-08 | 3 |
| log-sigma-5-0-mm-3D_glcM_JointAverage                      | 12,10267 | 3,54E-08 | 9,66E-08 | 1 |
| log-sigma-5-0-mm-3D_firstorder_Maximum                     | 12,05695 | 3,63E-08 | 9,88E-08 | 3 |
| wavelet-LHH_firstorder_MeanAbsoluteDeviation               | 12,06306 | 3,71E-08 | 1,01E-07 | 1 |
| log-sigma-5-0-mm-3D_glrIm_GrayLevelNonUniformityNormalized | 12,06173 | 3,73E-08 | 1,01E-07 | 3 |
| wavelet-LHH_firstorder_Range                               | 12,06012 | 3,72E-08 | 1,01E-07 | 1 |
| log-sigma-5-0-mm-3D_glszm_ZonePercentage                   | 12,0119  | 3,87E-08 | 1,04E-07 | 1 |
| original_glrIm_ShortRunHighGrayLevelEmphasis               | 11,98762 | 3,98E-08 | 1,07E-07 | 1 |
| wavelet-LLH_glszm_SmallAreaHighGrayLevelEmphasis           | 11,95522 | 4,18E-08 | 1,12E-07 | 1 |
| log-sigma-4-0-mm-3D_glcM_JointEnergy                       | 11,77045 | 5,04E-08 | 1,35E-07 | 3 |
| log-sigma-5-0-mm-3D_firstorder_Uniformity                  | 11,78418 | 5,11E-08 | 1,36E-07 | 3 |

|                                                            |          |          |          |   |
|------------------------------------------------------------|----------|----------|----------|---|
| wavelet-HLL_gldm_DependenceNonUniformityNormalized         | 11,70471 | 5,57E-08 | 1,48E-07 | 1 |
| log-sigma-2-0-mm-3D_glrlm_RunVariance                      | 11,69658 | 5,59E-08 | 1,48E-07 | 3 |
| original_gldm_SumSquares                                   | 11,68612 | 5,6E-08  | 1,48E-07 | 1 |
| wavelet-LLL_gldm_Contrast                                  | 11,67009 | 5,66E-08 | 1,49E-07 | 1 |
| original_gldm_DependenceEntropy                            | 11,57484 | 6,45E-08 | 1,7E-07  | 1 |
| log-sigma-5-0-mm-3D_glrlm_RunEntropy                       | 11,57173 | 6,47E-08 | 1,7E-07  | 1 |
| log-sigma-4-0-mm-3D_gldm_Contrast                          | 11,55216 | 6,56E-08 | 1,72E-07 | 1 |
| wavelet-LHL_gldm_MaximumProbability                        | 11,55722 | 6,56E-08 | 1,72E-07 | 3 |
| log-sigma-3-0-mm-3D_glrlm_LongRunLowGrayLevelEmphasis      | 11,50518 | 6,84E-08 | 1,79E-07 | 3 |
| wavelet-LHL_gldm_DependenceEntropy                         | 11,51877 | 6,88E-08 | 1,79E-07 | 1 |
| wavelet-HHL_gldm_LargeDependenceEmphasis                   | 11,4742  | 7,21E-08 | 1,87E-07 | 3 |
| wavelet-LHH_firstorder_10Percentile                        | 11,46869 | 7,28E-08 | 1,89E-07 | 3 |
| wavelet-HLH_glszm_LowGrayLevelZoneEmphasis                 | 11,45536 | 7,47E-08 | 1,93E-07 | 3 |
| original_glszm_HighGrayLevelZoneEmphasis                   | 11,40709 | 7,74E-08 | 2E-07    | 1 |
| log-sigma-3-0-mm-3D_gldm_DifferenceVariance                | 11,37621 | 8,02E-08 | 2,07E-07 | 1 |
| wavelet-HHL_glrlm_RunVariance                              | 11,34538 | 8,38E-08 | 2,15E-07 | 3 |
| log-sigma-3-0-mm-3D_gldm_Imc1                              | 11,33312 | 8,48E-08 | 2,17E-07 | 3 |
| original_gldm_Autocorrelation                              | 11,31227 | 8,61E-08 | 2,2E-07  | 1 |
| original_gldm_ClusterTendency                              | 11,30981 | 8,67E-08 | 2,21E-07 | 1 |
| wavelet-HLH_glszm_HighGrayLevelZoneEmphasis                | 11,29806 | 8,88E-08 | 2,26E-07 | 1 |
| wavelet-LHL_gldm_LargeDependenceEmphasis                   | 11,27954 | 9,03E-08 | 2,3E-07  | 3 |
| wavelet-HLH_firstorder_Minimum                             | 11,25779 | 9,33E-08 | 2,37E-07 | 3 |
| wavelet-LHL_gldm_JointEnergy                               | 11,2398  | 9,49E-08 | 2,4E-07  | 3 |
| wavelet-HLH_firstorder_Maximum                             | 11,21063 | 9,82E-08 | 2,48E-07 | 1 |
| original_gldm_DependenceVariance                           | 11,14579 | 1,06E-07 | 2,66E-07 | 3 |
| log-sigma-4-0-mm-3D_gldm_LowGrayLevelEmphasis              | 11,09878 | 1,12E-07 | 2,81E-07 | 3 |
| wavelet-LHH_gldm_JointEnergy                               | 11,09391 | 1,13E-07 | 2,84E-07 | 3 |
| wavelet-LLH_firstorder_90Percentile                        | 11,07087 | 1,17E-07 | 2,94E-07 | 1 |
| wavelet-HLH_firstorder_10Percentile                        | 10,99246 | 1,28E-07 | 3,19E-07 | 3 |
| wavelet-LLH_gldm_SmallDependenceHighGrayLevelEmphasis      | 10,90913 | 1,4E-07  | 3,48E-07 | 1 |
| wavelet-HLH_gldm_LargeDependenceEmphasis                   | 10,9031  | 1,4E-07  | 3,49E-07 | 3 |
| log-sigma-2-0-mm-3D_glszm_SmallAreaHighGrayLevelEmphasis   | 10,8263  | 1,53E-07 | 3,79E-07 | 1 |
| wavelet-LLL_glrlm_LongRunHighGrayLevelEmphasis             | 10,7676  | 1,64E-07 | 4,06E-07 | 1 |
| log-sigma-5-0-mm-3D_gldm_Contrast                          | 10,74578 | 1,69E-07 | 4,16E-07 | 1 |
| wavelet-LHH_firstorder_Maximum                             | 10,75227 | 1,69E-07 | 4,16E-07 | 1 |
| wavelet-LLL_gldm_DifferenceVariance                        | 10,70473 | 1,75E-07 | 4,31E-07 | 1 |
| wavelet-HLH_firstorder_Variance                            | 10,71113 | 1,77E-07 | 4,34E-07 | 1 |
| log-sigma-4-0-mm-3D_firstorder_Variance                    | 10,69565 | 1,79E-07 | 4,39E-07 | 1 |
| wavelet-LLL_glrlm_HighGrayLevelRunEmphasis                 | 10,68953 | 1,8E-07  | 4,39E-07 | 1 |
| log-sigma-3-0-mm-3D_glszm_SmallAreaHighGrayLevelEmphasis   | 10,68463 | 1,81E-07 | 4,41E-07 | 1 |
| log-sigma-4-0-mm-3D_gldm_GrayLevelVariance                 | 10,67817 | 1,83E-07 | 4,44E-07 | 1 |
| wavelet-HLH_gldm_SumSquares                                | 10,68241 | 1,83E-07 | 4,44E-07 | 1 |
| wavelet-LLL_glszm_HighGrayLevelZoneEmphasis                | 10,66944 | 1,84E-07 | 4,46E-07 | 1 |
| wavelet-LLL_gldm_HighGrayLevelEmphasis                     | 10,66615 | 1,85E-07 | 4,47E-07 | 1 |
| wavelet-LLH_firstorder_Maximum                             | 10,67184 | 1,86E-07 | 4,47E-07 | 1 |
| wavelet-LLL_glrlm_ShortRunHighGrayLevelEmphasis            | 10,66081 | 1,86E-07 | 4,47E-07 | 1 |
| log-sigma-4-0-mm-3D_glszm_GrayLevelNonUniformityNormalized | 10,6271  | 1,94E-07 | 4,64E-07 | 3 |

|                                                              |          |          |          |   |
|--------------------------------------------------------------|----------|----------|----------|---|
| wavelet-HHH_firstorder_90Percentile                          | 10,63518 | 1,94E-07 | 4,64E-07 | 1 |
| log-sigma-4-0-mm-3D_glrlm_ShortRunLowGrayLevelEmphasis       | 10,61492 | 1,99E-07 | 4,74E-07 | 3 |
| log-sigma-5-0-mm-3D_glcmm_MaximumProbability                 | 10,5902  | 2,08E-07 | 4,96E-07 | 3 |
| wavelet-HLH_glcmm_ClusterTendency                            | 10,53004 | 2,2E-07  | 5,24E-07 | 1 |
| log-sigma-3-0-mm-3D_glcmm_Autocorrelation                    | 10,47608 | 2,34E-07 | 5,55E-07 | 1 |
| wavelet-HLH_glcmm_Contrast                                   | 10,44306 | 2,44E-07 | 5,79E-07 | 1 |
| log-sigma-4-0-mm-3D_glcmm_Idn                                | 10,39237 | 2,59E-07 | 6,11E-07 | 3 |
| wavelet-HLL_glcmm_Contrast                                   | 10,38549 | 2,59E-07 | 6,11E-07 | 1 |
| log-sigma-4-0-mm-3D_glrlm_GrayLevelVariance                  | 10,37169 | 2,65E-07 | 6,24E-07 | 1 |
| wavelet-HHL_glcmm_Imc1                                       | 10,36928 | 2,67E-07 | 6,28E-07 | 3 |
| log-sigma-3-0-mm-3D_glrlm_LongRunHighGrayLevelEmphasis       | 10,35311 | 2,72E-07 | 6,36E-07 | 1 |
| wavelet-LHH_firstorder_RobustMeanAbsoluteDeviation           | 10,3552  | 2,71E-07 | 6,36E-07 | 1 |
| wavelet-HLH_glrlm_GrayLevelVariance                          | 10,3514  | 2,73E-07 | 6,37E-07 | 1 |
| log-sigma-4-0-mm-3D_glcmm_SumSquares                         | 10,34356 | 2,74E-07 | 6,39E-07 | 1 |
| wavelet-LHH_glszm_ZonePercentage                             | 10,32917 | 2,8E-07  | 6,51E-07 | 1 |
| original_glrlm_LongRunLowGrayLevelEmphasis                   | 10,30347 | 2,87E-07 | 6,66E-07 | 3 |
| original_glcmm_DifferenceVariance                            | 10,29392 | 2,88E-07 | 6,68E-07 | 1 |
| log-sigma-5-0-mm-3D_gldm_SmallDependenceEmphasis             | 10,29086 | 2,9E-07  | 6,7E-07  | 1 |
| wavelet-HLH_glszm_GrayLevelVariance                          | 10,2935  | 2,93E-07 | 6,76E-07 | 1 |
| log-sigma-2-0-mm-3D_glrlm_LongRunHighGrayLevelEmphasis       | 10,2674  | 3,02E-07 | 6,94E-07 | 1 |
| wavelet-LHH_glszm_GrayLevelNonUniformityNormalized           | 10,25629 | 3,08E-07 | 7,07E-07 | 3 |
| wavelet-HHL_firstorder_MeanAbsoluteDeviation                 | 10,25086 | 3,08E-07 | 7,07E-07 | 1 |
| log-sigma-4-0-mm-3D_glcmm_Imc2                               | 10,20932 | 3,15E-07 | 7,2E-07  | 1 |
| wavelet-HLH_glrlm_ShortRunHighGrayLevelEmphasis              | 10,21757 | 3,22E-07 | 7,34E-07 | 1 |
| wavelet-LHL_glcmm_DifferenceAverage                          | 10,19878 | 3,28E-07 | 7,46E-07 | 1 |
| log-sigma-3-0-mm-3D_gldm_DependenceVariance                  | 10,15149 | 3,46E-07 | 7,87E-07 | 3 |
| original_glcmm_Contrast                                      | 10,13796 | 3,49E-07 | 7,92E-07 | 1 |
| wavelet-HLL_gldm_DependenceVariance                          | 10,05371 | 3,92E-07 | 8,88E-07 | 3 |
| log-sigma-2-0-mm-3D_glszm_SmallAreaEmphasis                  | 10,05309 | 3,97E-07 | 8,97E-07 | 1 |
| original_glrlm_LowGrayLevelRunEmphasis                       | 10,03885 | 3,99E-07 | 8,99E-07 | 3 |
| wavelet-LLL_glcmm_Autocorrelation                            | 10,01731 | 4,07E-07 | 9,15E-07 | 1 |
| wavelet-LHH_glrlm_ShortRunEmphasis                           | 10,00633 | 4,16E-07 | 9,33E-07 | 1 |
| wavelet-LLL_glszm_SmallAreaHighGrayLevelEmphasis             | 9,994766 | 4,18E-07 | 9,37E-07 | 1 |
| wavelet-HHH_firstorder_MeanAbsoluteDeviation                 | 9,982343 | 4,3E-07  | 9,6E-07  | 1 |
| original_glszm_SmallAreaEmphasis                             | 9,934929 | 4,47E-07 | 9,97E-07 | 1 |
| log-sigma-5-0-mm-3D_glcmm_Idn                                | 9,909257 | 4,68E-07 | 1,04E-06 | 3 |
| wavelet-HLH_gldm_GrayLevelVariance                           | 9,877995 | 4,89E-07 | 1,09E-06 | 1 |
| wavelet-HLH_glcmm_DifferenceVariance                         | 9,873763 | 4,91E-07 | 1,09E-06 | 1 |
| wavelet-HLH_glrlm_HighGrayLevelRunEmphasis                   | 9,867036 | 4,96E-07 | 1,1E-06  | 1 |
| log-sigma-2-0-mm-3D_glcmm_Autocorrelation                    | 9,854211 | 5,01E-07 | 1,11E-06 | 1 |
| original_glrlm_ShortRunLowGrayLevelEmphasis                  | 9,846866 | 5,06E-07 | 1,12E-06 | 3 |
| wavelet-LHL_firstorder_RobustMeanAbsoluteDeviation           | 9,72318  | 5,91E-07 | 1,3E-06  | 1 |
| wavelet-LHH_firstorder_90Percentile                          | 9,725334 | 5,92E-07 | 1,3E-06  | 1 |
| log-sigma-3-0-mm-3D_gldm_LargeDependenceLowGrayLevelEmphasis | 9,635602 | 6,47E-07 | 1,42E-06 | 3 |
| wavelet-HLH_gldm_HighGrayLevelEmphasis                       | 9,636806 | 6,61E-07 | 1,45E-06 | 1 |
| original_gldm_LowGrayLevelEmphasis                           | 9,610957 | 6,8E-07  | 1,49E-06 | 3 |
| wavelet-HHL_glszm_GrayLevelNonUniformityNormalized           | 9,60968  | 6,84E-07 | 1,49E-06 | 3 |

|                                                               |          |          |          |   |
|---------------------------------------------------------------|----------|----------|----------|---|
| wavelet-HLL_gldm_GrayLevelVariance                            | 9,526368 | 7,53E-07 | 1,64E-06 | 1 |
| log-sigma-4-0-mm-3D_gldm_LargeDependenceEmphasis              | 9,509489 | 7,71E-07 | 1,67E-06 | 3 |
| wavelet-LHH_firstorder_InterquartileRange                     | 9,514552 | 7,71E-07 | 1,67E-06 | 1 |
| log-sigma-5-0-mm-3D_gldm_LargeDependenceEmphasis              | 9,478462 | 7,99E-07 | 1,73E-06 | 3 |
| wavelet-LLH_firstorder_Mean                                   | 9,463769 | 8,27E-07 | 1,78E-06 | 3 |
| wavelet-LLL_gldm_DependenceVariance                           | 9,457116 | 8,27E-07 | 1,78E-06 | 3 |
| wavelet-HLL_firstorder_Variance                               | 9,435543 | 8,45E-07 | 1,82E-06 | 1 |
| wavelet-HLL_glrlm_GrayLevelVariance                           | 9,391676 | 8,94E-07 | 1,92E-06 | 1 |
| log-sigma-2-0-mm-3D_gldm_SmallDependenceHighGrayLevelEmphasis | 9,378245 | 9,06E-07 | 1,94E-06 | 1 |
| wavelet-LLL_gldm_SmallDependenceHighGrayLevelEmphasis         | 9,370444 | 9,15E-07 | 1,96E-06 | 1 |
| log-sigma-3-0-mm-3D_firstorder_90Percentile                   | 9,345429 | 9,43E-07 | 2,01E-06 | 3 |
| wavelet-HLL_glszm_LowGrayLevelZoneEmphasis                    | 9,349632 | 9,5E-07  | 2,02E-06 | 3 |
| log-sigma-4-0-mm-3D_glrlm_ShortRunHighGrayLevelEmphasis       | 9,319561 | 9,85E-07 | 2,08E-06 | 1 |
| wavelet-HLL_glcm_JointAverage                                 | 9,321878 | 9,82E-07 | 2,08E-06 | 1 |
| wavelet-HHL_firstorder_InterquartileRange                     | 9,323286 | 9,83E-07 | 2,08E-06 | 1 |
| log-sigma-3-0-mm-3D_glrlm_LongRunEmphasis                     | 9,309237 | 9,95E-07 | 2,1E-06  | 3 |
| log-sigma-3-0-mm-3D_gldm_SmallDependenceHighGrayLevelEmphasis | 9,267344 | 1,05E-06 | 2,21E-06 | 1 |
| log-sigma-5-0-mm-3D_glrlm_ShortRunHighGrayLevelEmphasis       | 9,269763 | 1,05E-06 | 2,21E-06 | 1 |
| log-sigma-4-0-mm-3D_glrlm_HighGrayLevelRunEmphasis            | 9,262502 | 1,06E-06 | 2,23E-06 | 1 |
| wavelet-HLH_glszm_GrayLevelNonUniformityNormalized            | 9,25971  | 1,08E-06 | 2,27E-06 | 3 |
| log-sigma-5-0-mm-3D_glcm_JointEnergy                          | 9,242714 | 1,1E-06  | 2,31E-06 | 3 |
| log-sigma-4-0-mm-3D_gldm_HighGrayLevelEmphasis                | 9,224145 | 1,11E-06 | 2,33E-06 | 1 |
| wavelet-HLH_glrlm_RunVariance                                 | 9,223537 | 1,12E-06 | 2,33E-06 | 3 |
| log-sigma-4-0-mm-3D_glszm_GrayLevelVariance                   | 9,219377 | 1,12E-06 | 2,33E-06 | 1 |
| wavelet-LLL_gldm_LargeDependenceLowGrayLevelEmphasis          | 9,193639 | 1,13E-06 | 2,35E-06 | 3 |
| wavelet-HLH_gldm_LargeDependenceLowGrayLevelEmphasis          | 9,214656 | 1,14E-06 | 2,36E-06 | 3 |
| wavelet-LHH_glszm_GrayLevelVariance                           | 9,204925 | 1,15E-06 | 2,37E-06 | 1 |
| wavelet-LHL_firstorder_InterquartileRange                     | 9,190121 | 1,16E-06 | 2,4E-06  | 1 |
| log-sigma-4-0-mm-3D_glrlm_LongRunLowGrayLevelEmphasis         | 9,130547 | 1,23E-06 | 2,53E-06 | 3 |
| wavelet-LHH_glrlm_LongRunEmphasis                             | 9,107475 | 1,3E-06  | 2,67E-06 | 3 |
| wavelet-LHH_glszm_LowGrayLevelZoneEmphasis                    | 9,098403 | 1,32E-06 | 2,7E-06  | 3 |
| wavelet-HHL_firstorder_RobustMeanAbsoluteDeviation            | 9,067238 | 1,37E-06 | 2,8E-06  | 1 |
| wavelet-HLH_glcm_Autocorrelation                              | 9,056863 | 1,39E-06 | 2,84E-06 | 1 |
| wavelet-HLL_glcm_SumSquares                                   | 9,023359 | 1,44E-06 | 2,93E-06 | 1 |
| wavelet-HLL_firstorder_Mean                                   | 9,016903 | 1,46E-06 | 2,97E-06 | 3 |
| log-sigma-4-0-mm-3D_glcm_DifferenceVariance                   | 9,00496  | 1,47E-06 | 3E-06    | 1 |
| wavelet-LHH_glrlm_RunPercentage                               | 8,944857 | 1,6E-06  | 3,25E-06 | 1 |
| log-sigma-5-0-mm-3D_glrlm_HighGrayLevelRunEmphasis            | 8,937361 | 1,62E-06 | 3,28E-06 | 1 |
| wavelet-HHL_gldm_DependenceVariance                           | 8,927117 | 1,64E-06 | 3,31E-06 | 3 |
| wavelet-LLL_glcm_JointEntropy                                 | 8,895615 | 1,71E-06 | 3,46E-06 | 1 |
| log-sigma-4-0-mm-3D_glszm_HighGrayLevelZoneEmphasis           | 8,853981 | 1,8E-06  | 3,63E-06 | 1 |
| original_glszm_SmallAreaHighGrayLevelEmphasis                 | 8,842857 | 1,82E-06 | 3,66E-06 | 1 |
| log-sigma-4-0-mm-3D_glcm_ClusterTendency                      | 8,818921 | 1,88E-06 | 3,79E-06 | 1 |
| log-sigma-5-0-mm-3D_gldm_HighGrayLevelEmphasis                | 8,790823 | 1,96E-06 | 3,93E-06 | 1 |
| log-sigma-3-0-mm-3D_glszm_SmallAreaEmphasis                   | 8,727022 | 2,11E-06 | 4,22E-06 | 1 |
| wavelet-LHH_glcm_Idm                                          | 8,7115   | 2,18E-06 | 4,36E-06 | 3 |

|                                                              |          |          |          |   |
|--------------------------------------------------------------|----------|----------|----------|---|
| log-sigma-5-0-mm-3D_glszm_GrayLevelVariance                  | 8,706165 | 2,19E-06 | 4,37E-06 | 1 |
| wavelet-LLH_firstorder_RootMeanSquared                       | 8,712109 | 2,19E-06 | 4,37E-06 | 3 |
| log-sigma-2-0-mm-3D_gldm_DependenceNonUniformity             | 8,66464  | 2,32E-06 | 4,61E-06 | 1 |
| log-sigma-4-0-mm-3D_gldm_DependenceVariance                  | 8,657398 | 2,33E-06 | 4,63E-06 | 3 |
| wavelet-HLH_glrlm_LongRunLowGrayLevelEmphasis                | 8,649712 | 2,38E-06 | 4,72E-06 | 3 |
| wavelet-LHH_glcmm_Id                                         | 8,527826 | 2,78E-06 | 5,5E-06  | 3 |
| wavelet-LHH_glrlm_RunLengthNonUniformityNormalized           | 8,446733 | 3,09E-06 | 6,1E-06  | 1 |
| wavelet-HLH_glcmm_MaximumProbability                         | 8,398918 | 3,34E-06 | 6,58E-06 | 3 |
| wavelet-LHL_gldm_DependenceNonUniformityNormalized           | 8,372096 | 3,42E-06 | 6,72E-06 | 1 |
| log-sigma-4-0-mm-3D_glcmm_Autocorrelation                    | 8,342774 | 3,55E-06 | 6,98E-06 | 1 |
| wavelet-LHL_glcmm_Imc2                                       | 8,309067 | 3,72E-06 | 7,3E-06  | 1 |
| wavelet-LLH_glszm_SizeZoneNonUniformity                      | 8,291466 | 3,81E-06 | 7,46E-06 | 1 |
| wavelet-LLH_firstorder_Median                                | 8,275861 | 3,91E-06 | 7,65E-06 | 3 |
| wavelet-LHL_firstorder_Mean                                  | 8,179574 | 4,42E-06 | 8,62E-06 | 3 |
| log-sigma-5-0-mm-3D_glcmm_Autocorrelation                    | 8,086157 | 5,03E-06 | 9,8E-06  | 1 |
| wavelet-HLL_glcmm_ClusterTendency                            | 8,067426 | 5,13E-06 | 9,98E-06 | 1 |
| original_gldm_SmallDependenceHighGrayLevelEmphasis           | 8,038167 | 5,32E-06 | 1,03E-05 | 1 |
| wavelet-HLL_glcmm_DifferenceVariance                         | 8,036616 | 5,36E-06 | 1,04E-05 | 1 |
| wavelet-HLL_glszm_GrayLevelVariance                          | 7,962577 | 5,93E-06 | 1,15E-05 | 1 |
| wavelet-LLH_glcmm_InverseVariance                            | 7,562072 | 6,12E-06 | 1,18E-05 | 3 |
| wavelet-LHH_gldm_SmallDependenceEmphasis                     | 7,943077 | 6,13E-06 | 1,18E-05 | 1 |
| wavelet-LHH_firstorder_Minimum                               | 7,937326 | 6,18E-06 | 1,19E-05 | 3 |
| wavelet-HHL_gldm_DependenceEntropy                           | 7,922332 | 6,32E-06 | 1,21E-05 | 1 |
| wavelet-LHH_glcmm_JointAverage                               | 7,862887 | 6,85E-06 | 1,31E-05 | 1 |
| log-sigma-5-0-mm-3D_glszm_HighGrayLevelZoneEmphasis          | 7,845032 | 7,01E-06 | 1,34E-05 | 1 |
| wavelet-LHH_glcmm_DifferenceAverage                          | 7,810857 | 7,36E-06 | 1,41E-05 | 1 |
| original_glszm_SizeZoneNonUniformityNormalized               | 7,724558 | 8,27E-06 | 1,58E-05 | 1 |
| wavelet-HHL_glszm_ZonePercentage                             | 7,68426  | 8,77E-06 | 1,67E-05 | 1 |
| wavelet-HLH_gldm_SmallDependenceHighGrayLevelEmphasis        | 7,637638 | 9,35E-06 | 1,78E-05 | 1 |
| wavelet-LLL_gldm_DependenceNonUniformity                     | 7,486189 | 1,16E-05 | 2,2E-05  | 1 |
| wavelet-LLH_glcmm_Correlation                                | 7,47165  | 1,18E-05 | 2,23E-05 | 1 |
| log-sigma-5-0-mm-3D_gldm_DependenceVariance                  | 7,446915 | 1,22E-05 | 2,3E-05  | 3 |
| wavelet-HLL_firstorder_RootMeanSquared                       | 7,43692  | 1,24E-05 | 2,34E-05 | 3 |
| wavelet-LHL_glszm_HighGrayLevelZoneEmphasis                  | 7,406782 | 1,29E-05 | 2,44E-05 | 1 |
| wavelet-HHL_firstorder_Range                                 | 7,392082 | 1,32E-05 | 2,49E-05 | 1 |
| wavelet-HLH_glcmm_Imc1                                       | 7,352135 | 1,4E-05  | 2,62E-05 | 3 |
| wavelet-LHH_glcmm_Imc2                                       | 7,320711 | 1,46E-05 | 2,74E-05 | 1 |
| wavelet-LHL_glszm_SizeZoneNonUniformityNormalized            | 7,26455  | 1,58E-05 | 2,96E-05 | 1 |
| log-sigma-5-0-mm-3D_glrlm_GrayLevelVariance                  | 7,253395 | 1,61E-05 | 3,01E-05 | 1 |
| log-sigma-4-0-mm-3D_gldm_LargeDependenceLowGrayLevelEmphasis | 7,200247 | 1,7E-05  | 3,17E-05 | 3 |
| wavelet-LHL_glcmm_ClusterTendency                            | 7,21353  | 1,7E-05  | 3,17E-05 | 1 |
| log-sigma-5-0-mm-3D_firstorder_Variance                      | 7,203195 | 1,73E-05 | 3,21E-05 | 1 |
| log-sigma-5-0-mm-3D_gldm_GrayLevelVariance                   | 7,183053 | 1,78E-05 | 3,3E-05  | 1 |
| wavelet-LLH_glrlm_ShortRunLowGrayLevelEmphasis               | 7,142054 | 1,9E-05  | 3,52E-05 | 3 |
| wavelet-LHH_glrlm_GrayLevelVariance                          | 7,134948 | 1,91E-05 | 3,53E-05 | 1 |
| log-sigma-5-0-mm-3D_glcmm_DifferenceVariance                 | 7,093685 | 2,02E-05 | 3,73E-05 | 1 |
| wavelet-LHH_glcmm_MaximumProbability                         | 7,089382 | 2,04E-05 | 3,77E-05 | 3 |

|                                                            |          |          |          |   |
|------------------------------------------------------------|----------|----------|----------|---|
| log-sigma-5-0-mm-3D_glrIm_LongRunEmphasis                  | 7,014627 | 2,26E-05 | 4,16E-05 | 3 |
| wavelet-HLL_glcM_Correlation                               | 6,984381 | 2,36E-05 | 4,34E-05 | 1 |
| wavelet-LHL_glrIm_ShortRunHighGrayLevelEmphasis            | 6,981177 | 2,38E-05 | 4,36E-05 | 1 |
| wavelet-LHL_glrIm_HighGrayLevelRunEmphasis                 | 6,970968 | 2,41E-05 | 4,42E-05 | 1 |
| wavelet-LHL_gldM_HighGrayLevelEmphasis                     | 6,939399 | 2,52E-05 | 4,62E-05 | 1 |
| wavelet-LLL_glszm_SizeZoneNonUniformity                    | 6,899922 | 2,68E-05 | 4,89E-05 | 1 |
| wavelet-LLH_gldM_DependenceNonUniformity                   | 6,88793  | 2,73E-05 | 4,98E-05 | 1 |
| wavelet-HHH_firstorder_10Percentile                        | 6,883206 | 2,75E-05 | 5E-05    | 3 |
| log-sigma-4-0-mm-3D_glrIm_LongRunHighGrayLevelEmphasis     | 6,867856 | 2,81E-05 | 5,1E-05  | 1 |
| wavelet-LHL_glszm_SmallAreaEmphasis                        | 6,863419 | 2,82E-05 | 5,12E-05 | 1 |
| log-sigma-4-0-mm-3D_glrIm_GrayLevelNonUniformity           | 6,851113 | 2,88E-05 | 5,22E-05 | 3 |
| wavelet-LHL_glrIm_LongRunHighGrayLevelEmphasis             | 6,823333 | 2,99E-05 | 5,41E-05 | 1 |
| wavelet-HHH_firstorder_RobustMeanAbsoluteDeviation         | 6,813165 | 3,04E-05 | 5,5E-05  | 1 |
| wavelet-LHH_glcM_ClusterTendency                           | 6,788371 | 3,15E-05 | 5,68E-05 | 1 |
| wavelet-HLH_glrIm_LongRunHighGrayLevelEmphasis             | 6,78144  | 3,19E-05 | 5,74E-05 | 1 |
| wavelet-LHL_glszm_SmallAreaHighGrayLevelEmphasis           | 6,770197 | 3,23E-05 | 5,81E-05 | 1 |
| wavelet-LHH_glszm_HighGrayLevelZoneEmphasis                | 6,762421 | 3,28E-05 | 5,88E-05 | 1 |
| wavelet-LLL_glszm_SmallAreaLowGrayLevelEmphasis            | 6,746375 | 3,34E-05 | 5,98E-05 | 3 |
| original_glszm_SizeZoneNonUniformity                       | 6,742895 | 3,37E-05 | 6,02E-05 | 1 |
| log-sigma-2-0-mm-3D_glszm_SizeZoneNonUniformity            | 6,725901 | 3,45E-05 | 6,16E-05 | 1 |
| wavelet-LLH_glcM_ClusterProminence                         | 6,722312 | 3,46E-05 | 6,18E-05 | 1 |
| log-sigma-4-0-mm-3D_gldM_DependenceEntropy                 | 6,717154 | 3,5E-05  | 6,24E-05 | 1 |
| wavelet-LHL_glszm_GrayLevelVariance                        | 6,708909 | 3,54E-05 | 6,29E-05 | 1 |
| log-sigma-5-0-mm-3D_glcM_SumSquares                        | 6,705924 | 3,55E-05 | 6,3E-05  | 1 |
| log-sigma-4-0-mm-3D_glszm_SmallAreaHighGrayLevelEmphasis   | 6,687693 | 3,65E-05 | 6,46E-05 | 1 |
| original_gldM_DependenceNonUniformity                      | 6,685198 | 3,67E-05 | 6,49E-05 | 1 |
| wavelet-LHH_glszm_SmallAreaHighGrayLevelEmphasis           | 6,679613 | 3,7E-05  | 6,53E-05 | 1 |
| log-sigma-4-0-mm-3D_glszm_SmallAreaEmphasis                | 6,653318 | 3,83E-05 | 6,75E-05 | 1 |
| log-sigma-5-0-mm-3D_glrIm_GrayLevelNonUniformity           | 6,630119 | 3,98E-05 | 7,01E-05 | 3 |
| wavelet-HHL_firstorder_10Percentile                        | 6,615734 | 4,06E-05 | 7,14E-05 | 3 |
| log-sigma-5-0-mm-3D_glszm_GrayLevelNonUniformityNormalized | 6,610044 | 4,13E-05 | 7,26E-05 | 3 |
| wavelet-LHL_firstorder_RootMeanSquared                     | 6,545966 | 4,49E-05 | 7,87E-05 | 3 |
| wavelet-LHH_gldM_GrayLevelVariance                         | 6,472571 | 5,02E-05 | 8,79E-05 | 1 |
| wavelet-LHH_firstorder_Variance                            | 6,444866 | 5,24E-05 | 9,15E-05 | 1 |
| wavelet-HHL_firstorder_90Percentile                        | 6,416826 | 5,46E-05 | 9,53E-05 | 1 |
| wavelet-LHH_gldM_LargeDependenceEmphasis                   | 6,413194 | 5,49E-05 | 9,55E-05 | 3 |
| log-sigma-3-0-mm-3D_gldM_DependenceNonUniformity           | 6,409795 | 5,52E-05 | 9,58E-05 | 1 |
| wavelet-LLH_glrIm_LowGrayLevelRunEmphasis                  | 6,41583  | 5,51E-05 | 9,58E-05 | 3 |
| original_gldM_LargeDependenceLowGrayLevelEmphasis          | 6,312079 | 6,3E-05  | 0,000109 | 3 |
| wavelet-HLL_glszm_SizeZoneNonUniformityNormalized          | 6,288982 | 6,55E-05 | 0,000113 | 1 |
| wavelet-LLH_gldM_DependenceEntropy                         | 6,289016 | 6,62E-05 | 0,000114 | 1 |
| wavelet-HLH_glrIm_LowGrayLevelRunEmphasis                  | 6,281626 | 6,71E-05 | 0,000116 | 3 |
| wavelet-HLH_gldM_LowGrayLevelEmphasis                      | 6,268198 | 6,85E-05 | 0,000118 | 3 |
| log-sigma-4-0-mm-3D_firstorder_Maximum                     | 6,249196 | 6,96E-05 | 0,00012  | 3 |
| log-sigma-4-0-mm-3D_glrIm_LongRunEmphasis                  | 6,177695 | 7,8E-05  | 0,000134 | 3 |
| log-sigma-2-0-mm-3D_firstorder_Energy                      | 4,721889 | 8,14E-05 | 0,000139 | 3 |
| log-sigma-2-0-mm-3D_firstorder_TotalEnergy                 | 4,721889 | 8,14E-05 | 0,000139 | 3 |

|                                                               |          |          |          |   |
|---------------------------------------------------------------|----------|----------|----------|---|
| wavelet-HHL_gldm_DependenceNonUniformityNormalized            | 6,125713 | 8,46E-05 | 0,000145 | 1 |
| wavelet-LHH_glrlm_ShortRunHighGrayLevelEmphasis               | 6,12275  | 8,5E-05  | 0,000145 | 1 |
| wavelet-LHH_gldm_SumSquares                                   | 6,065474 | 9,27E-05 | 0,000158 | 1 |
| log-sigma-3-0-mm-3D_gldm_DependenceEntropy                    | 6,049652 | 9,51E-05 | 0,000162 | 1 |
| wavelet-LHL_gldm_DependenceVariance                           | 6,046741 | 9,54E-05 | 0,000162 | 3 |
| wavelet-HLH_glszm_SmallAreaHighGrayLevelEmphasis              | 5,908471 | 0,000118 | 0,0002   | 1 |
| wavelet-LHH_glrlm_HighGrayLevelRunEmphasis                    | 5,907385 | 0,000118 | 0,0002   | 1 |
| wavelet-LHL_glrlm_GrayLevelVariance                           | 5,891234 | 0,000121 | 0,000204 | 1 |
| wavelet-LHL_firstorder_Variance                               | 5,876249 | 0,000124 | 0,000209 | 1 |
| wavelet-LHH_glszm_LargeAreaLowGrayLevelEmphasis               | 5,86925  | 0,000125 | 0,00021  | 3 |
| wavelet-LHL_gldm_GrayLevelVariance                            | 5,811634 | 0,000137 | 0,00023  | 1 |
| wavelet-LHH_gldm_HighGrayLevelEmphasis                        | 5,809522 | 0,000137 | 0,000231 | 1 |
| wavelet-LHL_glszm_LowGrayLevelZoneEmphasis                    | 5,804345 | 0,000138 | 0,000232 | 3 |
| wavelet-LHH_glrlm_RunVariance                                 | 5,795728 | 0,00014  | 0,000235 | 3 |
| wavelet-LHL_gldm_SumSquares                                   | 5,773802 | 0,000145 | 0,000242 | 1 |
| wavelet-HLL_gldm_DependenceEntropy                            | 5,762733 | 0,000148 | 0,000247 | 1 |
| log-sigma-4-0-mm-3D_gldm_SmallDependenceHighGrayLevelEmphasis | 5,738407 | 0,000153 | 0,000255 | 1 |
| wavelet-HLL_gldm_LargeDependenceLowGrayLevelEmphasis          | 5,692415 | 0,000164 | 0,000273 | 3 |
| wavelet-LHH_gldm_DifferenceVariance                           | 5,66735  | 0,000171 | 0,000285 | 1 |
| log-sigma-5-0-mm-3D_gldm_ClusterTendency                      | 5,662707 | 0,000172 | 0,000286 | 1 |
| wavelet-LLH_gldm_LowGrayLevelEmphasis                         | 5,659181 | 0,000175 | 0,00029  | 3 |
| log-sigma-3-0-mm-3D_glszm_SizeZoneNonUniformity               | 5,61841  | 0,000184 | 0,000305 | 1 |
| wavelet-HLL_glszm_HighGrayLevelZoneEmphasis                   | 5,607619 | 0,000188 | 0,00031  | 1 |
| wavelet-LHL_gldm_Autocorrelation                              | 5,597459 | 0,000191 | 0,000315 | 1 |
| wavelet-LHL_gldm_SmallDependenceHighGrayLevelEmphasis         | 5,560335 | 0,000202 | 0,000333 | 1 |
| wavelet-HHL_gldm_SmallDependenceEmphasis                      | 5,543183 | 0,000208 | 0,000342 | 1 |
| wavelet-HHH_glrlm_RunEntropy                                  | 5,52594  | 0,000214 | 0,000351 | 1 |
| log-sigma-4-0-mm-3D_gldm_DependenceNonUniformity              | 5,521656 | 0,000215 | 0,000353 | 1 |
| log-sigma-3-0-mm-3D_firstorder_Energy                         | 4,34387  | 0,000217 | 0,000355 | 3 |
| log-sigma-3-0-mm-3D_firstorder_TotalEnergy                    | 4,34387  | 0,000217 | 0,000355 | 3 |
| wavelet-LLL_gldm_LargeDependenceHighGrayLevelEmphasis         | 5,509868 | 0,000219 | 0,000358 | 1 |
| wavelet-LLH_firstorder_Energy                                 | 4,328956 | 0,000225 | 0,000367 | 2 |
| wavelet-LLH_firstorder_TotalEnergy                            | 4,328955 | 0,000225 | 0,000367 | 2 |
| wavelet-HLL_glrlm_ShortRunHighGrayLevelEmphasis               | 5,467583 | 0,000234 | 0,00038  | 1 |
| wavelet-HLL_firstorder_90Percentile                           | 5,464844 | 0,000234 | 0,000381 | 1 |
| wavelet-HLL_glrlm_HighGrayLevelRunEmphasis                    | 5,43064  | 0,000248 | 0,000402 | 1 |
| wavelet-LLH_glrlm_GrayLevelNonUniformity                      | 5,418155 | 0,000253 | 0,000409 | 3 |
| wavelet-HLL_firstorder_Maximum                                | 5,417393 | 0,000253 | 0,000409 | 1 |
| wavelet-HLL_gldm_HighGrayLevelEmphasis                        | 5,414295 | 0,000254 | 0,000411 | 1 |
| wavelet-LHH_gldm_Autocorrelation                              | 5,413834 | 0,000255 | 0,000411 | 1 |
| wavelet-HLL_gldm_DependenceNonUniformity                      | 5,402413 | 0,000259 | 0,000418 | 1 |
| wavelet-HHH_firstorder_InterquartileRange                     | 5,393223 | 0,000263 | 0,000423 | 1 |
| wavelet-LHL_gldm_DifferenceVariance                           | 5,385514 | 0,000266 | 0,000427 | 1 |
| wavelet-HLL_glszm_SmallAreaLowGrayLevelEmphasis               | 5,381786 | 0,000267 | 0,000428 | 3 |
| wavelet-LLL_gldm_Imc2                                         | 5,381079 | 0,000268 | 0,000429 | 1 |
| log-sigma-5-0-mm-3D_glrlm_LongRunLowGrayLevelEmphasis         | 5,364341 | 0,000277 | 0,000444 | 3 |
| log-sigma-3-0-mm-3D_glrlm_GrayLevelNonUniformity              | 5,349445 | 0,000282 | 0,00045  | 3 |

|                                                               |          |          |          |   |
|---------------------------------------------------------------|----------|----------|----------|---|
| log-sigma-5-0-mm-3D_glszm_SmallAreaHighGrayLevelEmphasis      | 5,344827 | 0,000283 | 0,000452 | 1 |
| log-sigma-3-0-mm-3D_glrlm_RunVariance                         | 5,317546 | 0,000296 | 0,000471 | 3 |
| wavelet-LLL_firstorder_Energy                                 | 4,204444 | 0,00031  | 0,000492 | 1 |
| wavelet-LLL_firstorder_TotalEnergy                            | 4,204444 | 0,00031  | 0,000492 | 1 |
| log-sigma-2-0-mm-3D_firstorder_90Percentile                   | 5,275256 | 0,000314 | 0,000497 | 3 |
| log-sigma-5-0-mm-3D_gldm_SmallDependenceHighGrayLevelEmphasis | 5,269027 | 0,000319 | 0,000505 | 1 |
| log-sigma-2-0-mm-3D_glcm_ClusterProminence                    | 5,212539 | 0,000349 | 0,000552 | 1 |
| wavelet-LHH_glcm_Contrast                                     | 5,20748  | 0,000353 | 0,000558 | 1 |
| original_firstorder_Energy                                    | 4,14128  | 0,000364 | 0,000574 | 1 |
| original_firstorder_TotalEnergy                               | 4,14128  | 0,000364 | 0,000574 | 1 |
| wavelet-HLH_glrlm_ShortRunLowGrayLevelEmphasis                | 5,183697 | 0,000368 | 0,000578 | 3 |
| wavelet-HLL_glrlm_LongRunHighGrayLevelEmphasis                | 5,177518 | 0,00037  | 0,000581 | 1 |
| wavelet-LLH_glszm_SmallAreaEmphasis                           | 5,141593 | 0,000395 | 0,00062  | 1 |
| wavelet-HLL_glszm_SmallAreaHighGrayLevelEmphasis              | 5,13306  | 0,000397 | 0,000622 | 1 |
| wavelet-HLL_glszm_SmallAreaEmphasis                           | 5,095355 | 0,000425 | 0,000665 | 1 |
| wavelet-HLH_gldm_DependenceEntropy                            | 5,033144 | 0,000468 | 0,00073  | 1 |
| log-sigma-5-0-mm-3D_glrlm_LongRunHighGrayLevelEmphasis        | 4,985761 | 0,000504 | 0,000786 | 1 |
| log-sigma-4-0-mm-3D_glszm_SizeZoneNonUniformity               | 4,967839 | 0,000518 | 0,000806 | 1 |
| log-sigma-4-0-mm-3D_firstorder_Skewness                       | 4,915184 | 0,000564 | 0,000877 | 3 |
| log-sigma-2-0-mm-3D_glcm_Idn                                  | 4,912012 | 0,000568 | 0,000882 | 3 |
| log-sigma-4-0-mm-3D_firstorder_Energy                         | 3,959924 | 0,000578 | 0,000895 | 3 |
| log-sigma-4-0-mm-3D_firstorder_TotalEnergy                    | 3,959924 | 0,000578 | 0,000895 | 3 |
| wavelet-LHL_glrlm_LongRunLowGrayLevelEmphasis                 | 4,865027 | 0,000613 | 0,000948 | 3 |
| wavelet-LHH_glszm_SmallAreaEmphasis                           | 4,847388 | 0,000632 | 0,000975 | 1 |
| log-sigma-2-0-mm-3D_gldm_DependenceEntropy                    | 4,837817 | 0,000641 | 0,000989 | 1 |
| wavelet-LHH_glszm_SizeZoneNonUniformity                       | 4,834774 | 0,000644 | 0,000992 | 1 |
| wavelet-HLL_gldm_SmallDependenceHighGrayLevelEmphasis         | 4,825926 | 0,000652 | 0,001003 | 1 |
| log-sigma-4-0-mm-3D_glszm_GrayLevelNonUniformity              | 4,806571 | 0,000674 | 0,001035 | 1 |
| wavelet-HLL_glcm_Autocorrelation                              | 4,786564 | 0,000696 | 0,001067 | 1 |
| log-sigma-5-0-mm-3D_gldm_DependenceNonUniformity              | 4,73631  | 0,000756 | 0,001158 | 1 |
| log-sigma-5-0-mm-3D_glrlm_LowGrayLevelRunEmphasis             | 4,701345 | 0,000802 | 0,001227 | 3 |
| wavelet-HLL_glszm_SizeZoneNonUniformity                       | 4,692068 | 0,000813 | 0,001241 | 1 |
| wavelet-HHH_firstorder_Range                                  | 4,688189 | 0,000819 | 0,001249 | 1 |
| original_gldm_LargeDependenceHighGrayLevelEmphasis            | 4,684277 | 0,000823 | 0,001253 | 1 |
| wavelet-LLH_glrlm_LongRunLowGrayLevelEmphasis                 | 4,690604 | 0,000827 | 0,001259 | 3 |
| wavelet-HHL_firstorder_Maximum                                | 4,650006 | 0,000871 | 0,001323 | 1 |
| wavelet-LHL_gldm_DependenceNonUniformity                      | 4,642162 | 0,000883 | 0,001339 | 1 |
| wavelet-HLH_glcm_ClusterProminence                            | 4,637126 | 0,000888 | 0,001345 | 1 |
| log-sigma-2-0-mm-3D_glszm_GrayLevelNonUniformity              | 4,589032 | 0,000963 | 0,001457 | 1 |
| wavelet-LHH_gldm_SmallDependenceHighGrayLevelEmphasis         | 4,58545  | 0,000967 | 0,00146  | 1 |
| wavelet-HHL_glcm_Idn                                          | 4,586608 | 0,000967 | 0,00146  | 3 |
| log-sigma-2-0-mm-3D_glrlm_GrayLevelNonUniformity              | 4,523185 | 0,001074 | 0,001618 | 3 |
| wavelet-LHL_glrlm_LowGrayLevelRunEmphasis                     | 4,513247 | 0,001091 | 0,001642 | 3 |
| log-sigma-4-0-mm-3D_firstorder_Kurtosis                       | 4,474238 | 0,001162 | 0,001746 | 3 |
| log-sigma-5-0-mm-3D_firstorder_Energy                         | 3,668134 | 0,001206 | 0,001808 | 3 |
| log-sigma-5-0-mm-3D_firstorder_TotalEnergy                    | 3,668134 | 0,001206 | 0,001808 | 3 |
| wavelet-HHL_glcm_Contrast                                     | 4,4441   | 0,001223 | 0,001831 | 1 |



|                                                              |          |          |          |   |
|--------------------------------------------------------------|----------|----------|----------|---|
| wavelet-HHH_firstorder_Minimum                               | 4,388739 | 0,001342 | 0,002006 | 3 |
| wavelet-HHL_glszm_LargeAreaLowGrayLevelEmphasis              | 4,380058 | 0,001357 | 0,002026 | 3 |
| wavelet-LHL_glrlm_ShortRunLowGrayLevelEmphasis               | 4,349838 | 0,001431 | 0,002133 | 3 |
| log-sigma-5-0-mm-3D_gldm_LowGrayLevelEmphasis                | 4,34981  | 0,001434 | 0,002135 | 3 |
| wavelet-LHL_firstorder_Energy                                | 3,593634 | 0,001453 | 0,002158 | 3 |
| wavelet-LHL_firstorder_TotalEnergy                           | 3,593634 | 0,001453 | 0,002158 | 3 |
| log-sigma-2-0-mm-3D_glszm_SizeZoneNonUniformityNormalized    | 4,279267 | 0,0016   | 0,002372 | 1 |
| wavelet-LHL_gldm_LowGrayLevelEmphasis                        | 4,282351 | 0,001602 | 0,002372 | 3 |
| log-sigma-5-0-mm-3D_glcm_Imc2                                | 4,239514 | 0,001731 | 0,002561 | 1 |
| wavelet-LHL_glcm_Contrast                                    | 4,22228  | 0,001769 | 0,002613 | 1 |
| wavelet-HLH_glrlm_GrayLevelNonUniformity                     | 4,170687 | 0,001933 | 0,002851 | 3 |
| wavelet-LHH_firstorder_Mean                                  | 4,166118 | 0,001945 | 0,002865 | 1 |
| original_glcm_Correlation                                    | 4,158833 | 0,00197  | 0,002897 | 1 |
| wavelet-LHH_glrlm_LongRunHighGrayLevelEmphasis               | 4,14228  | 0,002027 | 0,002978 | 1 |
| wavelet-LHH_firstorder_RootMeanSquared                       | 4,09198  | 0,002204 | 0,003234 | 1 |
| wavelet-LHL_firstorder_Maximum                               | 4,07941  | 0,002253 | 0,003297 | 1 |
| wavelet-HHH_glcm_SumEntropy                                  | 4,080417 | 0,00225  | 0,003297 | 1 |
| wavelet-HHL_glcm_JointAverage                                | 4,072393 | 0,00228  | 0,003333 | 1 |
| wavelet-HHL_gldm_DependenceNonUniformity                     | 4,064983 | 0,002309 | 0,003371 | 1 |
| wavelet-LLH_glcm_Idn                                         | 4,049565 | 0,00237  | 0,003454 | 3 |
| log-sigma-5-0-mm-3D_glrlm_RunVariance                        | 4,02901  | 0,002449 | 0,003565 | 3 |
| wavelet-LHH_glrlm_GrayLevelNonUniformity                     | 4,02637  | 0,002465 | 0,003584 | 3 |
| log-sigma-5-0-mm-3D_gldm_LargeDependenceLowGrayLevelEmphasis | 4,007591 | 0,002565 | 0,003724 | 3 |
| log-sigma-3-0-mm-3D_glcm_ClusterProminence                   | 3,985694 | 0,002635 | 0,00382  | 1 |
| log-sigma-3-0-mm-3D_firstorder_Kurtosis                      | 3,968929 | 0,002709 | 0,003924 | 3 |
| log-sigma-3-0-mm-3D_glszm_GrayLevelNonUniformity             | 3,967171 | 0,002724 | 0,00394  | 1 |
| wavelet-LHL_glszm_SizeZoneNonUniformity                      | 3,941789 | 0,002844 | 0,004108 | 1 |
| log-sigma-5-0-mm-3D_glrlm_ShortRunLowGrayLevelEmphasis       | 3,920465 | 0,00295  | 0,004256 | 3 |
| wavelet-HHL_glszm_LowGrayLevelZoneEmphasis                   | 3,912998 | 0,002988 | 0,004305 | 3 |
| log-sigma-5-0-mm-3D_glszm_SizeZoneNonUniformity              | 3,90846  | 0,003002 | 0,00432  | 1 |
| wavelet-HHH_firstorder_Variance                              | 3,883307 | 0,003142 | 0,004516 | 1 |
| wavelet-HLH_glszm_GrayLevelNonUniformity                     | 3,832048 | 0,003429 | 0,004921 | 1 |
| wavelet-LLH_gldm_GrayLevelNonUniformity                      | 3,816092 | 0,003524 | 0,00505  | 3 |
| wavelet-HLL_glrlm_LongRunLowGrayLevelEmphasis                | 3,807563 | 0,003574 | 0,005117 | 3 |
| wavelet-LHH_firstorder_TotalEnergy                           | 3,212505 | 0,003724 | 0,005323 | 2 |
| wavelet-LHH_glcm_ClusterProminence                           | 3,773163 | 0,003788 | 0,005408 | 1 |
| wavelet-LHL_glszm_LargeAreaLowGrayLevelEmphasis              | 3,75889  | 0,003875 | 0,005525 | 3 |
| wavelet-LHL_gldm_LargeDependenceLowGrayLevelEmphasis         | 3,75187  | 0,003908 | 0,005566 | 3 |
| log-sigma-4-0-mm-3D_glrlm_RunVariance                        | 3,735016 | 0,004043 | 0,00575  | 3 |
| wavelet-HHH_glszm_ZoneEntropy                                | 3,722666 | 0,004136 | 0,005875 | 1 |
| wavelet-HHL_firstorder_Minimum                               | 3,691927 | 0,004359 | 0,006185 | 3 |
| wavelet-HHH_firstorder_Entropy                               | 3,663284 | 0,004579 | 0,006489 | 1 |
| wavelet-HHL_glcm_SumSquares                                  | 3,650472 | 0,004679 | 0,006622 | 1 |
| wavelet-LLH_firstorder_Kurtosis                              | 3,641092 | 0,004757 | 0,006723 | 3 |
| wavelet-HHH_glszm_SmallAreaEmphasis                          | 3,623657 | 0,004903 | 0,006921 | 1 |
| log-sigma-2-0-mm-3D_gldm_SmallDependenceLowGrayLevelEmphasis | 3,596395 | 0,005136 | 0,007241 | 1 |

|                                                              |          |          |          |   |
|--------------------------------------------------------------|----------|----------|----------|---|
| log-sigma-3-0-mm-3D_glcmldmn                                 | 3,569949 | 0,005375 | 0,007569 | 3 |
| wavelet-LHH_glcmlmc1                                         | 3,560037 | 0,005468 | 0,00769  | 3 |
| wavelet-LLH_glszm_GrayLevelNonUniformity                     | 3,515143 | 0,005912 | 0,008304 | 1 |
| wavelet-LLH_glrmlm_RunLengthNonUniformity                    | 3,489642 | 0,006178 | 0,008667 | 1 |
| wavelet-HHH_glrmlm_GrayLevelNonUniformityNormalized          | 3,485983 | 0,006218 | 0,008711 | 3 |
| wavelet-HHL_glrmlm_GrayLevelNonUniformity                    | 3,475803 | 0,006329 | 0,008855 | 3 |
| wavelet-HHH_glcmlm_DifferenceEntropy                         | 3,439721 | 0,006737 | 0,009415 | 1 |
| original_glszm_GrayLevelNonUniformity                        | 3,437185 | 0,006767 | 0,009445 | 2 |
| log-sigma-2-0-mm-3D_glrmlm_RunLengthNonUniformity            | 3,416999 | 0,007007 | 0,009768 | 1 |
| wavelet-HHH_glcmlm_JointEnergy                               | 3,410843 | 0,007084 | 0,009863 | 3 |
| wavelet-LHH_gldm_DependenceEntropy                           | 3,407439 | 0,007125 | 0,009908 | 1 |
| original_glrmlm_GrayLevelNonUniformity                       | 3,398978 | 0,007229 | 0,01004  | 3 |
| wavelet-LHH_glrmlm_LongRunLowGrayLevelEmphasis               | 3,38598  | 0,007403 | 0,010268 | 3 |
| wavelet-LLL_gldm_SmallDependenceLowGrayLevelEmphasis         | 3,376213 | 0,00752  | 0,010419 | 3 |
| wavelet-LHL_firstorder_90Percentile                          | 3,358996 | 0,007746 | 0,010718 | 1 |
| wavelet-HHH_firstorder_Uniformity                            | 3,358542 | 0,007756 | 0,010718 | 3 |
| wavelet-LHH_gldm_SmallDependenceLowGrayLevelEmphasis         | 3,350409 | 0,007865 | 0,010856 | 1 |
| wavelet-HHL_firstorder_Variance                              | 3,345313 | 0,007934 | 0,010937 | 1 |
| wavelet-HLL_glcmlm_ClusterProminence                         | 3,327581 | 0,00817  | 0,011236 | 1 |
| wavelet-HLL_glrmlm_GrayLevelNonUniformity                    | 3,328597 | 0,00817  | 0,011236 | 3 |
| log-sigma-2-0-mm-3D_firstorder_Kurtosis                      | 3,319164 | 0,008308 | 0,01141  | 3 |
| wavelet-LHH_glrmlm_LowGrayLevelRunEmphasis                   | 3,315248 | 0,008369 | 0,011476 | 3 |
| wavelet-HLH_glcmlm_Correlation                               | 3,31481  | 0,008376 | 0,011476 | 1 |
| wavelet-HHL_gldm_GrayLevelVariance                           | 3,296379 | 0,008639 | 0,011822 | 1 |
| log-sigma-5-0-mm-3D_glcmldmn                                 | 3,287456 | 0,008774 | 0,011992 | 3 |
| wavelet-LLL_glcmlm_ClusterProminence                         | 2,854529 | 0,008827 | 0,01205  | 1 |
| wavelet-HHL_glszm_GrayLevelVariance                          | 3,280594 | 0,008881 | 0,012109 | 1 |
| wavelet-HHH_glcmlm_JointEntropy                              | 3,256007 | 0,009273 | 0,012627 | 1 |
| wavelet-HHL_glrmlm_GrayLevelVariance                         | 3,254584 | 0,009292 | 0,012638 | 1 |
| wavelet-HHH_glcmldmn                                         | 3,251948 | 0,00934  | 0,012687 | 1 |
| log-sigma-3-0-mm-3D_glrmlm_RunLengthNonUniformity            | 3,248017 | 0,0094   | 0,012754 | 1 |
| log-sigma-4-0-mm-3D_gldm_SmallDependenceLowGrayLevelEmphasis | 3,245194 | 0,009445 | 0,012799 | 1 |
| wavelet-LHH_glrmlm_ShortRunLowGrayLevelEmphasis              | 3,243695 | 0,00948  | 0,012831 | 3 |
| wavelet-HHH_glszm_GrayLevelNonUniformityNormalized           | 3,239776 | 0,00954  | 0,012897 | 3 |
| wavelet-HLL_firstorder_Energy                                | 2,816163 | 0,009669 | 0,01304  | 2 |
| wavelet-HLL_firstorder_TotalEnergy                           | 2,816163 | 0,009669 | 0,01304  | 2 |
| wavelet-LHL_firstorder_Kurtosis                              | 3,231167 | 0,009682 | 0,013041 | 3 |
| wavelet-HLL_glrmlm_LowGrayLevelRunEmphasis                   | 3,22764  | 0,00974  | 0,013103 | 3 |
| log-sigma-2-0-mm-3D_gldm_GrayLevelNonUniformity              | 3,219747 | 0,009875 | 0,01327  | 3 |
| wavelet-LHH_firstorder_Energy                                | 3,212506 | 0,010005 | 0,013428 | 2 |
| original_glcmlm_ClusterProminence                            | 3,210387 | 0,010021 | 0,013433 | 1 |
| wavelet-HHH_glszm_GrayLevelVariance                          | 3,160962 | 0,010947 | 0,014657 | 1 |
| wavelet-LLH_gldm_LargeDependenceLowGrayLevelEmphasis         | 3,165039 | 0,011011 | 0,014725 | 3 |
| wavelet-HHH_glcmldn                                          | 3,15655  | 0,011032 | 0,014736 | 1 |
| wavelet-HHH_glcmlmc2                                         | 3,126266 | 0,01163  | 0,015516 | 1 |
| log-sigma-4-0-mm-3D_glcmlmc1                                 | 3,11407  | 0,011847 | 0,015768 | 3 |
| wavelet-HLL_glrmlm_ShortRunLowGrayLevelEmphasis              | 3,116047 | 0,011839 | 0,015768 | 3 |

|                                                       |          |          |          |   |
|-------------------------------------------------------|----------|----------|----------|---|
| wavelet-HLH_gldm_GrayLevelNonUniformity               | 3,109426 | 0,011981 | 0,015927 | 3 |
| log-sigma-3-0-mm-3D_gldm_Correlation                  | 3,108214 | 0,012001 | 0,015935 | 1 |
| wavelet-LHH_gldm_LowGrayLevelEmphasis                 | 3,09668  | 0,01226  | 0,016259 | 3 |
| log-sigma-3-0-mm-3D_gldm_InverseVariance              | 3,024107 | 0,012567 | 0,016647 | 3 |
| wavelet-HLL_gldm_RunLengthNonUniformity               | 3,081517 | 0,012582 | 0,016647 | 1 |
| wavelet-LHH_firstorder_Median                         | 3,077116 | 0,012677 | 0,016753 | 1 |
| wavelet-LHL_glszm_SmallAreaLowGrayLevelEmphasis       | 3,072952 | 0,012757 | 0,016819 | 3 |
| wavelet-HHL_gldm_ShortRunLowGrayLevelEmphasis         | 3,074042 | 0,012752 | 0,016819 | 3 |
| wavelet-HHL_gldm_LowGrayLevelRunEmphasis              | 3,066801 | 0,012916 | 0,017008 | 3 |
| wavelet-HHL_gldm_LongRunLowGrayLevelEmphasis          | 3,055927 | 0,013165 | 0,017316 | 3 |
| wavelet-HLL_gldm_GrayLevelNonUniformity               | 3,053716 | 0,013208 | 0,017352 | 3 |
| wavelet-HHL_gldm_ClusterTendency                      | 3,046166 | 0,013379 | 0,017556 | 1 |
| wavelet-HHH_glszm_LowGrayLevelZoneEmphasis            | 3,020682 | 0,013999 | 0,018348 | 3 |
| wavelet-HHH_firstorder_Maximum                        | 2,99754  | 0,014579 | 0,019086 | 1 |
| wavelet-HHL_glszm_SizeZoneNonUniformity               | 2,984541 | 0,014913 | 0,0195   | 1 |
| wavelet-LHH_gldm_GrayLevelNonUniformity               | 2,983609 | 0,014941 | 0,019513 | 3 |
| wavelet-LHL_gldm_Idn                                  | 2,980454 | 0,015023 | 0,019598 | 3 |
| wavelet-HLH_glszm_SizeZoneNonUniformity               | 2,96803  | 0,01535  | 0,020001 | 1 |
| wavelet-HHH_glszm_ZonePercentage                      | 2,966555 | 0,015393 | 0,020035 | 1 |
| wavelet-LLL_gldm_GrayLevelNonUniformity               | 2,964206 | 0,015454 | 0,020091 | 3 |
| wavelet-HHL_gldm_LargeDependenceLowGrayLevelEmphasis  | 2,947721 | 0,015911 | 0,02066  | 3 |
| log-sigma-5-0-mm-3D_glszm_GrayLevelNonUniformity      | 2,936019 | 0,016234 | 0,021055 | 1 |
| wavelet-LHL_gldm_ClusterProminence                    | 2,932743 | 0,016316 | 0,021137 | 1 |
| wavelet-LHL_gldm_GrayLevelNonUniformity               | 2,929342 | 0,016435 | 0,021266 | 3 |
| original_gldm_RunLengthNonUniformity                  | 2,927668 | 0,016485 | 0,021287 | 1 |
| wavelet-HHL_gldm_GrayLevelNonUniformity               | 2,927504 | 0,016489 | 0,021287 | 3 |
| wavelet-HHL_gldm_DifferenceVariance                   | 2,865067 | 0,018401 | 0,023728 | 1 |
| wavelet-LLH_gldm_LargeDependenceHighGrayLevelEmphasis | 2,860197 | 0,018561 | 0,023907 | 1 |
| original_glszm_SmallAreaLowGrayLevelEmphasis          | 2,854503 | 0,018695 | 0,024052 | 3 |
| log-sigma-5-0-mm-3D_glszm_SmallAreaEmphasis           | 2,852891 | 0,018765 | 0,024115 | 1 |
| wavelet-HHL_gldm_Idmn                                 | 2,850608 | 0,018879 | 0,024233 | 3 |
| wavelet-HHL_gldm_LowGrayLevelEmphasis                 | 2,837993 | 0,019311 | 0,024759 | 3 |
| log-sigma-4-0-mm-3D_gldm_RunLengthNonUniformity       | 2,827145 | 0,019671 | 0,025192 | 1 |
| wavelet-HLL_gldm_LowGrayLevelEmphasis                 | 2,822618 | 0,01983  | 0,025366 | 3 |
| wavelet-HLH_gldm_RunLengthNonUniformity               | 2,820896 | 0,019895 | 0,02542  | 1 |
| original_gldm_GrayLevelNonUniformity                  | 2,806028 | 0,02042  | 0,026061 | 3 |
| wavelet-LHH_gldm_LargeDependenceLowGrayLevelEmphasis  | 2,744163 | 0,022781 | 0,029041 | 3 |
| wavelet-LLH_glszm_LargeAreaLowGrayLevelEmphasis       | 2,739137 | 0,022938 | 0,029208 | 3 |
| wavelet-LLL_gldm_GrayLevelNonUniformity               | 2,703881 | 0,024449 | 0,031097 | 3 |
| wavelet-LHL_firstorder_Skewness                       | 2,690117 | 0,025045 | 0,031818 | 3 |
| log-sigma-4-0-mm-3D_gldm_ClusterProminence            | 2,658607 | 0,026458 | 0,033576 | 1 |
| wavelet-LHL_gldm_RunLengthNonUniformity               | 2,654704 | 0,026676 | 0,033814 | 1 |
| wavelet-LHL_gldm_GrayLevelNonUniformity               | 2,6494   | 0,026923 | 0,034088 | 3 |
| wavelet-LHH_gldm_RunLengthNonUniformity               | 2,601923 | 0,029282 | 0,037033 | 1 |
| log-sigma-5-0-mm-3D_gldm_RunLengthNonUniformity       | 2,596536 | 0,029556 | 0,037337 | 1 |
| log-sigma-3-0-mm-3D_gldm_GrayLevelNonUniformity       | 2,595242 | 0,029617 | 0,037373 | 3 |
| wavelet-HHL_gldm_RunLengthNonUniformity               | 2,582714 | 0,030293 | 0,038183 | 1 |

|                                                              |          |          |          |      |
|--------------------------------------------------------------|----------|----------|----------|------|
| wavelet-HLH_glszm_SizeZoneNonUniformityNormalized            | 2,577406 | 0,030474 | 0,038367 | 3    |
| wavelet-HHH_glszm_SmallAreaHighGrayLevelEmphasis             | 2,572575 | 0,030837 | 0,038781 | 1    |
| wavelet-LLL_glrlm_RunLengthNonUniformity                     | 2,565839 | 0,03121  | 0,039205 | 1    |
| wavelet-HLH_gldm_DependenceNonUniformity                     | 2,554872 | 0,031821 | 0,039928 | 1    |
| log-sigma-3-0-mm-3D_firstorder_Maximum                       | 2,548394 | 0,032154 | 0,0403   | 3    |
| wavelet-HLL_firstorder_Median                                | 2,485033 | 0,035993 | 0,045061 | 3    |
| wavelet-HHH_gldm_SmallDependenceEmphasis                     | 2,464156 | 0,037347 | 0,046704 | 1    |
| log-sigma-2-0-mm-3D_glcm_Correlation                         | 2,448752 | 0,038373 | 0,047934 | 1    |
| log-sigma-4-0-mm-3D_glcm_Idmn                                | 2,445389 | 0,038602 | 0,048166 | 3    |
| wavelet-HHH_glszm_SizeZoneNonUniformity                      | 2,44213  | 0,038827 | 0,048393 | 1    |
| wavelet-LHL_glcm_Idmn                                        | 2,432731 | 0,039481 | 0,049153 | 3    |
| wavelet-HHH_glcm_JointAverage                                | 2,431315 | 0,039579 | 0,049221 | 1    |
| log-sigma-5-0-mm-3D_gldm_GrayLevelNonUniformity              | 2,417645 | 0,04054  | 0,05036  | n.s. |
| wavelet-LHL_gldm_LargeDependenceHighGrayLevelEmphasis        | 2,394953 | 0,042196 | 0,052357 | n.s. |
| wavelet-HHL_glszm_SmallAreaHighGrayLevelEmphasis             | 2,394391 | 0,042242 | 0,052357 | n.s. |
| log-sigma-4-0-mm-3D_gldm_GrayLevelNonUniformity              | 2,370767 | 0,044035 | 0,054519 | n.s. |
| wavelet-HHL_glszm_HighGrayLevelZoneEmphasis                  | 2,361048 | 0,044805 | 0,055411 | n.s. |
| wavelet-HLL_gldm_LargeDependenceHighGrayLevelEmphasis        | 2,354241 | 0,04534  | 0,056011 | n.s. |
| wavelet-HLH_gldm_DependenceNonUniformityNormalized           | 2,32259  | 0,047944 | 0,059162 | n.s. |
| wavelet-HHL_glrlm_ShortRunHighGrayLevelEmphasis              | 2,31569  | 0,048537 | 0,059828 | n.s. |
| wavelet-HHL_gldm_SmallDependenceHighGrayLevelEmphasis        | 2,280844 | 0,051605 | 0,06354  | n.s. |
| wavelet-LHH_glszm_GrayLevelNonUniformity                     | 2,262659 | 0,053301 | 0,065556 | n.s. |
| wavelet-HHH_glrlm_LongRunHighGrayLevelEmphasis               | 2,22239  | 0,057215 | 0,070293 | n.s. |
| wavelet-HHH_glrlm_GrayLevelVariance                          | 2,212241 | 0,058246 | 0,071481 | n.s. |
| wavelet-HLL_glszm_LargeAreaLowGrayLevelEmphasis              | 2,203706 | 0,059073 | 0,072416 | n.s. |
| wavelet-HHH_gldm_DependenceVariance                          | 2,200618 | 0,059455 | 0,072805 | n.s. |
| wavelet-HHH_glrlm_GrayLevelNonUniformity                     | 2,19015  | 0,060561 | 0,074078 | n.s. |
| wavelet-HHH_glszm_HighGrayLevelZoneEmphasis                  | 2,181846 | 0,061445 | 0,075078 | n.s. |
| wavelet-HHH_glcm_DifferenceVariance                          | 2,1741   | 0,062288 | 0,076023 | n.s. |
| wavelet-HHL_glrlm_HighGrayLevelRunEmphasis                   | 2,171566 | 0,062564 | 0,076278 | n.s. |
| wavelet-HHH_gldm_LargeDependenceHighGrayLevelEmphasis        | 2,159448 | 0,063915 | 0,07784  | n.s. |
| wavelet-HHL_gldm_HighGrayLevelEmphasis                       | 2,1579   | 0,064085 | 0,077962 | n.s. |
| wavelet-HHH_glrlm_ShortRunLowGrayLevelEmphasis               | 2,129159 | 0,067412 | 0,08192  | n.s. |
| wavelet-HHH_glcm_Correlation                                 | 2,114914 | 0,069139 | 0,083927 | n.s. |
| wavelet-HLL_glcm_ClusterShade                                | 2,092527 | 0,071832 | 0,087102 | n.s. |
| wavelet-HLL_glcm_Idn                                         | 2,091913 | 0,071957 | 0,087159 | n.s. |
| log-sigma-3-0-mm-3D_gldm_SmallDependenceLowGrayLevelEmphasis | 2,089235 | 0,072274 | 0,087448 | n.s. |
| wavelet-HHH_gldm_DependenceNonUniformity                     | 2,082903 | 0,07311  | 0,088365 | n.s. |
| log-sigma-3-0-mm-3D_glszm_SizeZoneNonUniformityNormalized    | 2,074016 | 0,074192 | 0,089575 | n.s. |
| wavelet-HLL_glcm_Idmn                                        | 2,072049 | 0,074504 | 0,089854 | n.s. |
| original_glcm_Idn                                            | 2,051807 | 0,077198 | 0,093004 | n.s. |
| wavelet-HHH_firstorder_Median                                | 2,04912  | 0,077508 | 0,093276 | n.s. |
| wavelet-HHH_gldm_GrayLevelNonUniformity                      | 2,045191 | 0,078101 | 0,093889 | n.s. |
| wavelet-HHH_gldm_DependenceEntropy                           | 2,037697 | 0,079132 | 0,095027 | n.s. |
| wavelet-LHH_glszm_LargeAreaEmphasis                          | 2,032392 | 0,079854 | 0,095791 | n.s. |
| wavelet-HLH_firstorder_TotalEnergy                           | 1,877233 | 0,080569 | 0,096545 | n.s. |
| wavelet-LHH_gldm_DependenceNonUniformity                     | 2,025628 | 0,080819 | 0,096741 | n.s. |

|                                                               |          |          |          |      |
|---------------------------------------------------------------|----------|----------|----------|------|
| log-sigma-3-0-mm-3D_gldm_LargeDependenceHighGrayLevelEmphasis | 2,018023 | 0,081887 | 0,097914 | n.s. |
| wavelet-HLH_gldm_InverseVariance                              | 2,0093   | 0,083199 | 0,099377 | n.s. |
| wavelet-HHH_gldm_LowGrayLevelRunEmphasis                      | 2,004635 | 0,083837 | 0,100032 | n.s. |
| log-sigma-4-0-mm-3D_gldm_Correlation                          | 1,997258 | 0,084911 | 0,101205 | n.s. |
| wavelet-HLL_gldm_SmallDependenceLowGrayLevelEmphasis          | 1,972526 | 0,088654 | 0,105554 | n.s. |
| wavelet-HHH_glszm_LargeAreaLowGrayLevelEmphasis               | 1,967081 | 0,089468 | 0,10641  | n.s. |
| wavelet-LLL_gldm_Idn                                          | 1,942304 | 0,093459 | 0,111039 | n.s. |
| wavelet-HHH_gldm_HighGrayLevelRunEmphasis                     | 1,928481 | 0,095728 | 0,113614 | n.s. |
| wavelet-HLH_firstorder_Kurtosis                               | 1,925107 | 0,09626  | 0,114124 | n.s. |
| log-sigma-2-0-mm-3D_glszm_LargeAreaHighGrayLevelEmphasis      | 1,921118 | 0,096966 | 0,114774 | n.s. |
| wavelet-HHH_gldm_LowGrayLevelEmphasis                         | 1,920853 | 0,097014 | 0,114774 | n.s. |
| log-sigma-5-0-mm-3D_gldm_InverseVariance                      | 1,91846  | 0,097446 | 0,115164 | n.s. |
| original_firstorder_Skewness                                  | 1,917161 | 0,097608 | 0,115233 | n.s. |
| wavelet-HLH_gldm_SmallDependenceLowGrayLevelEmphasis          | 1,908784 | 0,099053 | 0,116816 | n.s. |
| log-sigma-2-0-mm-3D_firstorder_Maximum                        | 1,905015 | 0,09968  | 0,117431 | n.s. |
| wavelet-HHH_gldm_Autocorrelation                              | 1,902351 | 0,100174 | 0,117889 | n.s. |
| wavelet-HHH_gldm_HighGrayLevelEmphasis                        | 1,898357 | 0,100871 | 0,118585 | n.s. |
| log-sigma-5-0-mm-3D_gldm_ClusterProminence                    | 1,893277 | 0,101716 | 0,119452 | n.s. |
| wavelet-LHH_gldm_Correlation                                  | 1,8876   | 0,102744 | 0,120533 | n.s. |
| log-sigma-2-0-mm-3D_glszm_SmallAreaLowGrayLevelEmphasis       | 1,881276 | 0,103791 | 0,121634 | n.s. |
| wavelet-HLH_firstorder_Energy                                 | 1,877233 | 0,104647 | 0,122508 | n.s. |
| wavelet-HLH_glszm_LargeAreaLowGrayLevelEmphasis               | 1,875281 | 0,104953 | 0,122737 | n.s. |
| wavelet-HHH_gldm_GrayLevelVariance                            | 1,871152 | 0,105747 | 0,123537 | n.s. |
| wavelet-HHH_gldm_RunLengthNonUniformity                       | 1,826966 | 0,114153 | 0,133219 | n.s. |
| wavelet-HHL_gldm_Autocorrelation                              | 1,820555 | 0,115413 | 0,134408 | n.s. |
| wavelet-HHH_gldm_ShortRunHighGrayLevelEmphasis                | 1,820959 | 0,115331 | 0,134408 | n.s. |
| wavelet-HHH_gldm_ShortRunEmphasis                             | 1,810557 | 0,117427 | 0,136611 | n.s. |
| wavelet-HHH_gldm_Imc1                                         | 1,807634 | 0,118021 | 0,137159 | n.s. |
| log-sigma-3-0-mm-3D_firstorder_Skewness                       | 1,781701 | 0,123346 | 0,143199 | n.s. |
| log-sigma-4-0-mm-3D_gldm_LargeDependenceHighGrayLevelEmphasis | 1,773172 | 0,125231 | 0,145237 | n.s. |
| wavelet-LHH_gldm_Idmn                                         | 1,752902 | 0,129672 | 0,150231 | n.s. |
| wavelet-LLL_glszm_LargeAreaLowGrayLevelEmphasis               | 1,747701 | 0,130751 | 0,151324 | n.s. |
| wavelet-HLH_firstorder_RootMeanSquared                        | 1,709195 | 0,139743 | 0,161564 | n.s. |
| wavelet-LHL_gldm_Correlation                                  | 1,704404 | 0,1409   | 0,162671 | n.s. |
| wavelet-HHH_gldm_ClusterTendency                              | 1,703989 | 0,140991 | 0,162671 | n.s. |
| log-sigma-5-0-mm-3D_gldm_ClusterShade                         | 1,699191 | 0,142039 | 0,163711 | n.s. |
| log-sigma-2-0-mm-3D_glszm_LargeAreaLowGrayLevelEmphasis       | 1,68737  | 0,144991 | 0,166942 | n.s. |
| log-sigma-5-0-mm-3D_glszm_SmallAreaLowGrayLevelEmphasis       | 1,685184 | 0,145548 | 0,16741  | n.s. |
| log-sigma-3-0-mm-3D_glszm_LargeAreaHighGrayLevelEmphasis      | 1,681121 | 0,146601 | 0,168448 | n.s. |
| wavelet-LLL_firstorder_Kurtosis                               | 1,670032 | 0,149311 | 0,171386 | n.s. |
| wavelet-LLH_glszm_LargeAreaEmphasis                           | 1,664055 | 0,150882 | 0,172989 | n.s. |
| wavelet-HLH_gldm_ClusterShade                                 | 1,663267 | 0,151017 | 0,172989 | n.s. |
| wavelet-HHH_gldm_InverseVariance                              | 1,641802 | 0,15317  | 0,175276 | n.s. |
| wavelet-HHH_gldm_LongRunLowGrayLevelEmphasis                  | 1,6534   | 0,153683 | 0,175682 | n.s. |
| log-sigma-4-0-mm-3D_glszm_LargeAreaLowGrayLevelEmphasis       | 1,649423 | 0,154672 | 0,176632 | n.s. |
| wavelet-HHL_glszm_LargeAreaEmphasis                           | 1,636287 | 0,158194 | 0,18047  | n.s. |

|                                                              |          |          |          |      |
|--------------------------------------------------------------|----------|----------|----------|------|
| wavelet-HHH_glszm_LargeAreaEmphasis                          | 1,625341 | 0,161167 | 0,183674 | n.s. |
| log-sigma-4-0-mm-3D_glcm_InverseVariance                     | 1,614522 | 0,164292 | 0,187045 | n.s. |
| wavelet-HHL_glszm_SmallAreaEmphasis                          | 1,612101 | 0,16482  | 0,187455 | n.s. |
| wavelet-HLL_glszm_LargeAreaEmphasis                          | 1,597534 | 0,168882 | 0,19188  | n.s. |
| wavelet-HLH_glszm_SmallAreaEmphasis                          | 1,589753 | 0,171154 | 0,194264 | n.s. |
| log-sigma-5-0-mm-3D_glszm_LargeAreaLowGrayLevelEmphasis      | 1,575378 | 0,175294 | 0,198762 | n.s. |
| wavelet-HHH_gldm_LargeDependenceLowGrayLevelEmphasis         | 1,573215 | 0,175973 | 0,199329 | n.s. |
| wavelet-HHH_glcm_SumSquares                                  | 1,56333  | 0,17893  | 0,202474 | n.s. |
| log-sigma-5-0-mm-3D_glszm_LargeAreaHighGrayLevelEmphasis     | 1,559891 | 0,179954 | 0,203427 | n.s. |
| wavelet-HHH_gldm_LargeDependenceEmphasis                     | 1,555317 | 0,181361 | 0,204809 | n.s. |
| wavelet-HHH_glcm_MaximumProbability                          | 1,549178 | 0,183242 | 0,206725 | n.s. |
| wavelet-HHH_glcm_Idm                                         | 1,546292 | 0,184121 | 0,207507 | n.s. |
| wavelet-HHH_gldm_DependenceNonUniformityNormalized           | 1,539989 | 0,18608  | 0,209504 | n.s. |
| wavelet-LLH_glszm_LargeAreaHighGrayLevelEmphasis             | 1,529229 | 0,18945  | 0,213084 | n.s. |
| log-sigma-2-0-mm-3D_glszm_LargeAreaEmphasis                  | 1,523228 | 0,191318 | 0,214969 | n.s. |
| wavelet-LLL_glszm_GrayLevelNonUniformity                     | 1,520324 | 0,192296 | 0,21585  | n.s. |
| log-sigma-3-0-mm-3D_glszm_SmallAreaLowGrayLevelEmphasis      | 1,502512 | 0,194588 | 0,218158 | n.s. |
| wavelet-HLH_gldm_LargeDependenceHighGrayLevelEmphasis        | 1,512725 | 0,194742 | 0,218158 | n.s. |
| wavelet-HHH_glcm_DifferenceAverage                           | 1,510128 | 0,195587 | 0,218885 | n.s. |
| wavelet-HHH_glszm_GrayLevelNonUniformity                     | 1,50327  | 0,197836 | 0,22118  | n.s. |
| wavelet-LLL_glcm_Idmn                                        | 1,497008 | 0,199907 | 0,223273 | n.s. |
| log-sigma-5-0-mm-3D_glcm_Imc1                                | 1,490292 | 0,202057 | 0,225449 | n.s. |
| wavelet-HHL_firstorder_TotalEnergy                           | 1,41571  | 0,204081 | 0,22748  | n.s. |
| log-sigma-3-0-mm-3D_glszm_LargeAreaLowGrayLevelEmphasis      | 1,480322 | 0,205471 | 0,228801 | n.s. |
| log-sigma-5-0-mm-3D_gldm_SmallDependenceLowGrayLevelEmphasis | 1,47136  | 0,208584 | 0,232036 | n.s. |
| wavelet-HLH_glszm_LargeAreaEmphasis                          | 1,465714 | 0,210534 | 0,233973 | n.s. |
| log-sigma-5-0-mm-3D_glszm_LargeAreaEmphasis                  | 1,4611   | 0,21213  | 0,235513 | n.s. |
| log-sigma-4-0-mm-3D_glszm_LargeAreaHighGrayLevelEmphasis     | 1,460171 | 0,212483 | 0,235671 | n.s. |
| wavelet-LHH_gldm_LargeDependenceHighGrayLevelEmphasis        | 1,457215 | 0,213536 | 0,236604 | n.s. |
| wavelet-HHH_glcm_Id                                          | 1,448775 | 0,216531 | 0,239685 | n.s. |
| wavelet-HHH_glcm_Contrast                                    | 1,445934 | 0,217544 | 0,240568 | n.s. |
| log-sigma-3-0-mm-3D_glszm_LargeAreaEmphasis                  | 1,443308 | 0,218451 | 0,241333 | n.s. |
| wavelet-HHH_glrIm_LongRunEmphasis                            | 1,44097  | 0,219338 | 0,242072 | n.s. |
| wavelet-HLH_glcm_Idmn                                        | 1,433893 | 0,221897 | 0,244656 | n.s. |
| wavelet-LLH_glszm_ZoneVariance                               | 1,428968 | 0,223671 | 0,246368 | n.s. |
| wavelet-HHH_gldm_SmallDependenceHighGrayLevelEmphasis        | 1,417423 | 0,227974 | 0,250862 | n.s. |
| wavelet-HHL_firstorder_Energy                                | 1,415711 | 0,228637 | 0,251344 | n.s. |
| wavelet-HHL_firstorder_Kurtosis                              | 1,41446  | 0,229094 | 0,251599 | n.s. |
| log-sigma-4-0-mm-3D_glszm_LargeAreaEmphasis                  | 1,410011 | 0,230737 | 0,252821 | n.s. |
| wavelet-HLL_glszm_ZoneVariance                               | 1,410257 | 0,230644 | 0,252821 | n.s. |
| wavelet-HHL_glszm_ZoneVariance                               | 1,409685 | 0,230886 | 0,252821 | n.s. |
| wavelet-HHH_glrIm_RunPercentage                              | 1,402147 | 0,233769 | 0,255728 | n.s. |
| wavelet-LHL_glszm_LargeAreaEmphasis                          | 1,401133 | 0,234117 | 0,255859 | n.s. |
| wavelet-LLL_glszm_LargeAreaEmphasis                          | 1,399457 | 0,234738 | 0,256286 | n.s. |
| original_glszm_LargeAreaEmphasis                             | 1,39494  | 0,236497 | 0,257906 | n.s. |
| wavelet-HHL_glrIm_LongRunHighGrayLevelEmphasis               | 1,394556 | 0,236683 | 0,257906 | n.s. |
| log-sigma-2-0-mm-3D_glszm_ZoneVariance                       | 1,390249 | 0,238314 | 0,25943  | n.s. |

|                                                               |          |          |          |      |
|---------------------------------------------------------------|----------|----------|----------|------|
| wavelet-LHH_glszm_ZoneVariance                                | 1,38912  | 0,238784 | 0,25969  | n.s. |
| wavelet-HHH_glrIm_RunLengthNonUniformityNormalized            | 1,380496 | 0,242176 | 0,263122 | n.s. |
| wavelet-HHL_glszm_SizeZoneNonUniformityNormalized             | 1,365841 | 0,247998 | 0,269186 | n.s. |
| wavelet-LLH_glszm_SizeZoneNonUniformityNormalized             | 1,356141 | 0,251817 | 0,273067 | n.s. |
| log-sigma-5-0-mm-3D_gldm_LargeDependenceHighGrayLevelEmphasis | 1,351608 | 0,253797 | 0,274414 | n.s. |
| wavelet-HLH_firstorder_Mean                                   | 1,352189 | 0,253563 | 0,274414 | n.s. |
| wavelet-HLH_glszm_LargeAreaHighGrayLevelEmphasis              | 1,351882 | 0,253689 | 0,274414 | n.s. |
| wavelet-HLH_firstorder_Skewness                               | 1,347343 | 0,255493 | 0,275982 | n.s. |
| original_glcm_Idmn                                            | 1,346135 | 0,256062 | 0,276149 | n.s. |
| wavelet-LHL_glszm_GrayLevelNonUniformity                      | 1,345951 | 0,256141 | 0,276149 | n.s. |
| wavelet-HHH_firstorder_Kurtosis                               | 1,326824 | 0,264146 | 0,284504 | n.s. |
| wavelet-HHH_firstorder_Skewness                               | 1,325347 | 0,264701 | 0,284827 | n.s. |
| wavelet-LLL_glcm_Correlation                                  | 1,317995 | 0,267933 | 0,288028 | n.s. |
| log-sigma-3-0-mm-3D_glszm_ZoneVariance                        | 1,305601 | 0,273285 | 0,293499 | n.s. |
| wavelet-HHL_glcm_ClusterProminence                            | 1,303606 | 0,274152 | 0,294148 | n.s. |
| wavelet-HHH_glszm_ZoneVariance                                | 1,301096 | 0,275301 | 0,295097 | n.s. |
| log-sigma-4-0-mm-3D_glcm_ClusterShade                         | 1,293929 | 0,278378 | 0,29811  | n.s. |
| original_glszm_ZoneVariance                                   | 1,290786 | 0,279841 | 0,29939  | n.s. |
| log-sigma-2-0-mm-3D_glcm_Idmn                                 | 1,284764 | 0,282576 | 0,301738 | n.s. |
| wavelet-HHL_glcm_ClusterShade                                 | 1,28491  | 0,282501 | 0,301738 | n.s. |
| wavelet-HHL_glszm_SmallAreaLowGrayLevelEmphasis               | 1,259189 | 0,29423  | 0,313883 | n.s. |
| wavelet-LLH_glszm_SmallAreaLowGrayLevelEmphasis               | 1,245363 | 0,30071  | 0,320377 | n.s. |
| wavelet-LLL_glszm_ZoneVariance                                | 1,24507  | 0,30089  | 0,320377 | n.s. |
| wavelet-LLH_gldm_SmallDependenceLowGrayLevelEmphasis          | 1,239062 | 0,303793 | 0,32316  | n.s. |
| wavelet-LHH_gldm_DependenceNonUniformityNormalized            | 1,236182 | 0,305177 | 0,324125 | n.s. |
| wavelet-HLH_glszm_ZoneVariance                                | 1,235958 | 0,30528  | 0,324125 | n.s. |
| wavelet-LHL_glszm_ZoneVariance                                | 1,233072 | 0,306654 | 0,325274 | n.s. |
| log-sigma-4-0-mm-3D_glszm_ZoneVariance                        | 1,229992 | 0,308141 | 0,326542 | n.s. |
| wavelet-HHH_glcm_ClusterProminence                            | 1,218529 | 0,313753 | 0,332174 | n.s. |
| wavelet-HHH_glrIm_RunVariance                                 | 1,205656 | 0,320154 | 0,33863  | n.s. |
| wavelet-LLH_firstorder_Skewness                               | 1,201453 | 0,32225  | 0,340525 | n.s. |
| log-sigma-5-0-mm-3D_firstorder_Skewness                       | 1,200646 | 0,322612 | 0,340586 | n.s. |
| wavelet-HHL_gldm_LargeDependenceHighGrayLevelEmphasis         | 1,182526 | 0,331881 | 0,350041 | n.s. |
| wavelet-LLL_glszm_LargeAreaHighGrayLevelEmphasis              | 1,163399 | 0,341824 | 0,360188 | n.s. |
| log-sigma-5-0-mm-3D_glszm_ZoneVariance                        | 1,162189 | 0,342448 | 0,360506 | n.s. |
| wavelet-HHL_firstorder_RootMeanSquared                        | 1,160063 | 0,343602 | 0,36138  | n.s. |
| wavelet-LLL_glcm_ClusterShade                                 | 1,153741 | 0,344372 | 0,36185  | n.s. |
| original_glszm_LargeAreaLowGrayLevelEmphasis                  | 1,157033 | 0,345141 | 0,362317 | n.s. |
| log-sigma-5-0-mm-3D_firstorder_Kurtosis                       | 1,153763 | 0,346915 | 0,363837 | n.s. |
| wavelet-HHH_glszm_LargeAreaHighGrayLevelEmphasis              | 1,150903 | 0,348475 | 0,365132 | n.s. |
| wavelet-HHL_glszm_LargeAreaHighGrayLevelEmphasis              | 1,110266 | 0,370743 | 0,3881   | n.s. |
| wavelet-LHL_gldm_SmallDependenceLowGrayLevelEmphasis          | 1,109493 | 0,371179 | 0,388193 | n.s. |
| original_firstorder_Kurtosis                                  | 1,105322 | 0,373493 | 0,390248 | n.s. |
| wavelet-LLL_firstorder_Skewness                               | 1,094962 | 0,379391 | 0,39604  | n.s. |
| log-sigma-5-0-mm-3D_glszm_SizeZoneNonUniformityNormalized     | 1,079893 | 0,388131 | 0,404786 | n.s. |
| wavelet-LHH_glszm_LargeAreaHighGrayLevelEmphasis              | 1,073155 | 0,392031 | 0,408473 | n.s. |

|                                                               |          |          |          |      |
|---------------------------------------------------------------|----------|----------|----------|------|
| log-sigma-2-0-mm-3D_gldm_LargeDependenceHighGrayLevelEmphasis | 1,069589 | 0,394124 | 0,41027  | n.s. |
| wavelet-LLH_gldm_ClusterShade                                 | 1,046679 | 0,407721 | 0,42403  | n.s. |
| wavelet-LHH_gldm_InverseVariance                              | 1,023426 | 0,421902 | 0,43837  | n.s. |
| wavelet-LHH_glszm_SizeZoneNonUniformityNormalized             | 0,976751 | 0,449762 | 0,466884 | n.s. |
| original_gldm_ClusterShade                                    | 0,961683 | 0,459668 | 0,476283 | n.s. |
| original_glszm_LargeAreaHighGrayLevelEmphasis                 | 0,964568 | 0,459415 | 0,476283 | n.s. |
| log-sigma-5-0-mm-3D_gldm_Correlation                          | 0,944102 | 0,472942 | 0,489583 | n.s. |
| wavelet-HHH_gldm_ClusterShade                                 | 0,905148 | 0,499322 | 0,516412 | n.s. |
| wavelet-HHH_firstorder_Energy                                 | 0,875373 | 0,52018  | 0,536991 | n.s. |
| wavelet-HHH_firstorder_TotalEnergy                            | 0,87538  | 0,520175 | 0,536991 | n.s. |
| wavelet-LHL_glszm_LargeAreaHighGrayLevelEmphasis              | 0,86592  | 0,52688  | 0,543406 | n.s. |
| log-sigma-4-0-mm-3D_glszm_SizeZoneNonUniformityNormalized     | 0,862246 | 0,529468 | 0,545091 | n.s. |
| wavelet-LHH_gldm_DependenceVariance                           | 0,862258 | 0,529489 | 0,545091 | n.s. |
| wavelet-HLH_gldm_DependenceVariance                           | 0,859143 | 0,531707 | 0,54687  | n.s. |
| wavelet-HHH_firstorder_Mean                                   | 0,85721  | 0,533097 | 0,547796 | n.s. |
| wavelet-HLL_glszm_GrayLevelNonUniformity                      | 0,846465 | 0,540821 | 0,555223 | n.s. |
| wavelet-HHH_firstorder_RootMeanSquared                        | 0,814068 | 0,564446 | 0,578946 | n.s. |
| wavelet-HHL_glszm_GrayLevelNonUniformity                      | 0,807619 | 0,569208 | 0,583294 | n.s. |
| wavelet-HLL_glszm_LargeAreaHighGrayLevelEmphasis              | 0,787293 | 0,584328 | 0,598241 | n.s. |
| wavelet-HHH_glszm_SizeZoneNonUniformityNormalized             | 0,776507 | 0,592402 | 0,605952 | n.s. |
| log-sigma-5-0-mm-3D_gldm_DependenceEntropy                    | 0,747846 | 0,614131 | 0,627604 | n.s. |
| wavelet-HLL_firstorder_Skewness                               | 0,743969 | 0,61707  | 0,630031 | n.s. |
| wavelet-LHH_firstorder_Kurtosis                               | 0,735244 | 0,623761 | 0,636282 | n.s. |
| wavelet-HHH_glszm_SmallAreaLowGrayLevelEmphasis               | 0,726726 | 0,630297 | 0,642363 | n.s. |
| wavelet-HHL_firstorder_Skewness                               | 0,68616  | 0,661656 | 0,673708 | n.s. |
| wavelet-HLL_firstorder_Kurtosis                               | 0,657431 | 0,684028 | 0,695854 | n.s. |
| wavelet-LHH_firstorder_Skewness                               | 0,655163 | 0,685797 | 0,696524 | n.s. |
| wavelet-HHL_firstorder_Mean                                   | 0,654989 | 0,685933 | 0,696524 | n.s. |
| wavelet-HHL_gldm_SmallDependenceLowGrayLevelEmphasis          | 0,632577 | 0,703425 | 0,713638 | n.s. |
| wavelet-HLH_gldm_Idn                                          | 0,59523  | 0,732526 | 0,742488 | n.s. |
| log-sigma-3-0-mm-3D_gldm_ClusterShade                         | 0,592155 | 0,734919 | 0,744239 | n.s. |
| wavelet-HHL_gldm_Correlation                                  | 0,579364 | 0,744831 | 0,753594 | n.s. |
| wavelet-HHH_gldm_SmallDependenceLowGrayLevelEmphasis          | 0,573651 | 0,749245 | 0,757374 | n.s. |
| wavelet-LHH_glszm_SmallAreaLowGrayLevelEmphasis               | 0,525528 | 0,786021 | 0,793832 | n.s. |
| wavelet-LHH_gldm_Idn                                          | 0,472467 | 0,825277 | 0,832726 | n.s. |
| wavelet-HLH_glszm_SmallAreaLowGrayLevelEmphasis               | 0,464137 | 0,831279 | 0,837503 | n.s. |
| wavelet-HHL_firstorder_Median                                 | 0,463812 | 0,831511 | 0,837503 | n.s. |
| original_gldm_SmallDependenceLowGrayLevelEmphasis             | 0,453441 | 0,838875 | 0,84416  | n.s. |
| wavelet-LHL_gldm_ClusterShade                                 | 0,426457 | 0,857625 | 0,862253 | n.s. |
| log-sigma-4-0-mm-3D_glszm_SmallAreaLowGrayLevelEmphasis       | 0,425408 | 0,858915 | 0,862774 | n.s. |
| wavelet-HLH_firstorder_Median                                 | 0,40298  | 0,873336 | 0,876472 | n.s. |
| log-sigma-2-0-mm-3D_firstorder_Skewness                       | 0,250497 | 0,956703 | 0,959277 | n.s. |
| log-sigma-2-0-mm-3D_gldm_ClusterShade                         | 0,245664 | 0,958693 | 0,960412 | n.s. |
| wavelet-LLH_gldm_Idmn                                         | 0,185676 | 0,979414 | 0,98029  | n.s. |
| wavelet-LHH_gldm_ClusterShade                                 | 0,139246 | 0,990285 | 0,990285 | n.s. |
