# Supplementary material for: Contrast Agent Dynamics Determine Radiomics Profiles in Oncologic Imaging
Source: MDPI journal article supplement (doi:10.3390/cancers16081519), 2024-04-16
Supplement: s1 [file s1]

**Table S2: Linear mixed model p values and cluster membership of all CT radiomics features for prostate tumors**

| Feature                                        | F value  | p value  | FDR      | Cluster |
|------------------------------------------------|----------|----------|----------|---------|
| wavelet.LLL_firstorder_10Percentile            | 27,23873 | 5,41E-12 | 6,51E-09 | 1       |
| original_firstorder_10Percentile               | 24,76451 | 2,1E-11  | 1,27E-08 | 1       |
| wavelet.LLL_firstorder_Mean                    | 17,41063 | 2,48E-09 | 6,79E-07 | 1       |
| wavelet.LLL_firstorder_Median                  | 16,65636 | 4,38E-09 | 6,79E-07 | 1       |
| wavelet.LLL_firstorder_RootMeanSquared         | 16,61733 | 4,51E-09 | 6,79E-07 | 1       |
| original_firstorder_Mean                       | 17,43015 | 2,45E-09 | 6,79E-07 | 1       |
| original_firstorder_Median                     | 16,94702 | 3,51E-09 | 6,79E-07 | 1       |
| original_firstorder_RootMeanSquared            | 17,09667 | 3,14E-09 | 6,79E-07 | 1       |
| log.sigma.2.0.mm.3D_firstorder_Energy          | 8,120235 | 8,48E-09 | 1,02E-06 | 2       |
| log.sigma.2.0.mm.3D_firstorder_TotalEnergy     | 8,120235 | 8,48E-09 | 1,02E-06 | 2       |
| log.sigma.1.0.mm.3D_firstorder_Energy          | 7,858671 | 1,74E-08 | 1,75E-06 | 2       |
| log.sigma.1.0.mm.3D_firstorder_TotalEnergy     | 7,858671 | 1,74E-08 | 1,75E-06 | 2       |
| wavelet.LLH_firstorder_Energy                  | 7,770431 | 2,23E-08 | 1,91E-06 | 2       |
| wavelet.LLH_firstorder_TotalEnergy             | 7,770431 | 2,23E-08 | 1,91E-06 | 2       |
| log.sigma.3.0.mm.3D_firstorder_Energy          | 7,000608 | 1,84E-07 | 1,38E-05 | 2       |
| log.sigma.3.0.mm.3D_firstorder_TotalEnergy     | 7,000608 | 1,84E-07 | 1,38E-05 | 2       |
| log.sigma.5.0.mm.3D_firstorder_90Percentile    | 11,67295 | 3,14E-07 | 2,22E-05 | 2       |
| wavelet.LLL_firstorder_90Percentile            | 10,35442 | 1,17E-06 | 7,85E-05 | 1       |
| original_firstorder_90Percentile               | 10,22599 | 1,34E-06 | 8,5E-05  | 1       |
| log.sigma.4.0.mm.3D_firstorder_90Percentile    | 9,730438 | 2,26E-06 | 0,000136 | 2       |
| wavelet.LLL_firstorder_Maximum                 | 9,538095 | 2,79E-06 | 0,000154 | 1       |
| log.sigma.4.0.mm.3D_firstorder_Energy          | 5,976198 | 2,94E-06 | 0,000154 | 2       |
| log.sigma.4.0.mm.3D_firstorder_TotalEnergy     | 5,976198 | 2,94E-06 | 0,000154 | 2       |
| wavelet.LLL_firstorder_Energy                  | 5,774758 | 5,04E-06 | 0,000202 | 1       |
| wavelet.LLL_firstorder_TotalEnergy             | 5,774758 | 5,04E-06 | 0,000202 | 1       |
| log.sigma.2.0.mm.3D_glszm_ZoneEntropy          | 9,10847  | 4,47E-06 | 0,000202 | 1       |
| log.sigma.5.0.mm.3D_firstorder_Mean            | 9,096205 | 4,53E-06 | 0,000202 | 2       |
| log.sigma.5.0.mm.3D_firstorder_RootMeanSquared | 9,109004 | 4,46E-06 | 0,000202 | 2       |
| original_firstorder_Energy                     | 5,779267 | 4,98E-06 | 0,000202 | 1       |
| original_firstorder_TotalEnergy                | 5,779267 | 4,98E-06 | 0,000202 | 1       |
| log.sigma.5.0.mm.3D_firstorder_Median          | 8,647163 | 7,51E-06 | 0,000284 | 2       |
| original_firstorder_Maximum                    | 8,641996 | 7,56E-06 | 0,000284 | 1       |
| wavelet.HLH_firstorder_InterquartileRange      | 8,449874 | 9,42E-06 | 0,000344 | 1       |
| wavelet.LLL_glcmlmc2                           | 8,165853 | 1,31E-05 | 0,000465 | 1       |
| log.sigma.2.0.mm.3D_glrlm_LongRunEmphasis      | 7,979484 | 1,64E-05 | 0,000563 | 2       |
| log.sigma.4.0.mm.3D_firstorder_RootMeanSquared | 7,570064 | 2,68E-05 | 0,000896 | 2       |
| log.sigma.4.0.mm.3D_firstorder_Mean            | 7,531825 | 2,81E-05 | 0,000914 | 2       |
| log.sigma.2.0.mm.3D_glrlm_ShortRunEmphasis     | 7,503525 | 2,91E-05 | 0,000921 | 1       |
| log.sigma.5.0.mm.3D_firstorder_Energy          | 5,085386 | 3,14E-05 | 0,000945 | 2       |
| log.sigma.5.0.mm.3D_firstorder_TotalEnergy     | 5,085386 | 3,14E-05 | 0,000945 | 2       |
| log.sigma.1.0.mm.3D_firstorder_Range           | 7,373465 | 3,41E-05 | 0,001002 | 1       |

|                                                            |          |          |          |   |
|------------------------------------------------------------|----------|----------|----------|---|
| log.sigma.4.0.mm.3D_firstorder_Median                      | 7,340504 | 3,55E-05 | 0,001019 | 2 |
| log.sigma.2.0.mm.3D_glszm_ZonePercentage                   | 7,262323 | 3,92E-05 | 0,001097 | 1 |
| log.sigma.5.0.mm.3D_firstorder_10Percentile                | 7,065753 | 5,01E-05 | 0,001371 | 2 |
| log.sigma.2.0.mm.3D_glrlm_GrayLevelNonUniformityNormalized | 6,973229 | 5,63E-05 | 0,001455 | 2 |
| log.sigma.2.0.mm.3D_gldm_SmallDependenceEmphasis           | 6,966442 | 5,68E-05 | 0,001455 | 1 |
| log.sigma.3.0.mm.3D_gldm_DependenceEntropy                 | 6,975004 | 5,62E-05 | 0,001455 | 1 |
| log.sigma.2.0.mm.3D_firstorder_Median                      | 6,93905  | 5,88E-05 | 0,001475 | 2 |
| original_glcmm_JointAverage                                | 6,91272  | 6,08E-05 | 0,001494 | 1 |
| log.sigma.1.0.mm.3D_glszm_GrayLevelVariance                | 6,789201 | 7,12E-05 | 0,001715 | 1 |
| log.sigma.2.0.mm.3D_glcmm_DifferenceEntropy                | 6,65725  | 8,44E-05 | 0,001992 | 1 |
| log.sigma.3.0.mm.3D_firstorder_RootMeanSquared             | 6,589421 | 9,22E-05 | 0,002134 | 2 |
| wavelet.HLH_firstorder_RobustMeanAbsoluteDeviation         | 6,539591 | 9,83E-05 | 0,00214  | 1 |
| log.sigma.2.0.mm.3D_firstorder_Minimum                     | 6,538    | 9,85E-05 | 0,00214  | 2 |
| log.sigma.3.0.mm.3D_firstorder_Mean                        | 6,530428 | 9,95E-05 | 0,00214  | 2 |
| log.sigma.3.0.mm.3D_firstorder_Median                      | 6,565822 | 9,5E-05  | 0,00214  | 2 |
| wavelet.HLL_glrlm_RunLengthNonUniformity                   | 6,508891 | 0,000102 | 0,002162 | 1 |
| log.sigma.1.0.mm.3D_glrlm_GrayLevelVariance                | 6,441594 | 0,000112 | 0,002273 | 1 |
| log.sigma.2.0.mm.3D_glcmm_InverseVariance                  | 6,446664 | 0,000111 | 0,002273 | 1 |
| original_glrlm_LongRunHighGrayLevelEmphasis                | 6,431514 | 0,000113 | 0,002273 | 1 |
| log.sigma.2.0.mm.3D_firstorder_RootMeanSquared             | 6,403775 | 0,000117 | 0,002319 | 2 |
| wavelet.LLH_glcmm_DifferenceEntropy                        | 6,369127 | 0,000123 | 0,002378 | 1 |
| log.sigma.2.0.mm.3D_firstorder_Mean                        | 6,359595 | 0,000125 | 0,002378 | 2 |
| log.sigma.2.0.mm.3D_gldm_LargeDependenceEmphasis           | 6,348041 | 0,000126 | 0,002378 | 2 |
| original_glcmm_Imc2                                        | 6,334601 | 0,000129 | 0,002384 | 1 |
| log.sigma.2.0.mm.3D_glrlm_RunPercentage                    | 6,308824 | 0,000133 | 0,002429 | 1 |
| log.sigma.3.0.mm.3D_glrlm_LongRunEmphasis                  | 6,232028 | 0,000147 | 0,002649 | 2 |
| log.sigma.1.0.mm.3D_firstorder_Minimum                     | 6,173713 | 0,000159 | 0,002804 | 2 |
| log.sigma.1.0.mm.3D_glrlm_RunEntropy                       | 6,167333 | 0,000161 | 0,002804 | 1 |
| log.sigma.1.0.mm.3D_glrlm_GrayLevelNonUniformity           | 6,142285 | 0,000166 | 0,002858 | 2 |
| wavelet.HLL_firstorder_Mean                                | 6,126607 | 0,00017  | 0,002878 | 2 |
| wavelet.HLL_gldm_GrayLevelNonUniformity                    | 6,083443 | 0,00018  | 0,002926 | 2 |
| log.sigma.1.0.mm.3D_glszm_SmallAreaHighGrayLevelEmphasis   | 6,087304 | 0,000179 | 0,002926 | 1 |
| original_glrlm_RunLengthNonUniformity                      | 6,085157 | 0,000179 | 0,002926 | 1 |
| log.sigma.2.0.mm.3D_firstorder_Entropy                     | 6,042486 | 0,00019  | 0,00305  | 1 |
| wavelet.HLH_firstorder_MeanAbsoluteDeviation               | 6,006695 | 0,000199 | 0,003159 | 1 |
| wavelet.HLH_firstorder_10Percentile                        | 5,968071 | 0,00021  | 0,003285 | 2 |
| log.sigma.2.0.mm.3D_glcmm_SumEntropy                       | 5,956501 | 0,000213 | 0,003294 | 1 |
| log.sigma.2.0.mm.3D_glcmm_JointEntropy                     | 5,941247 | 0,000218 | 0,003321 | 1 |
| original_gldm_GrayLevelNonUniformity                       | 5,929063 | 0,000222 | 0,003334 | 2 |
| wavelet.HLL_firstorder_10Percentile                        | 5,846072 | 0,000248 | 0,003593 | 2 |
| wavelet.HLL_firstorder_Variance                            | 5,838161 | 0,000251 | 0,003593 | 1 |
| wavelet.LLL_gldm_GrayLevelNonUniformity                    | 5,848506 | 0,000247 | 0,003593 | 2 |
| original_gldm_HighGrayLevelEmphasis                        | 5,841593 | 0,00025  | 0,003593 | 1 |
| wavelet.LLL_glrlm_GrayLevelNonUniformity                   | 5,75529  | 0,000281 | 0,003668 | 2 |
| wavelet.LLL_glrlm_GrayLevelNonUniformityNormalized         | 5,753509 | 0,000281 | 0,003668 | 2 |
| log.sigma.1.0.mm.3D_firstorder_Mean                        | 5,746619 | 0,000284 | 0,003668 | 2 |

|                                                            |          |          |          |   |
|------------------------------------------------------------|----------|----------|----------|---|
| log.sigma.2.0.mm.3D_glrlm_RunLengthNonUniformityNormalized | 5,745153 | 0,000285 | 0,003668 | 1 |
| log.sigma.2.0.mm.3D_glcml_Id                               | 5,812882 | 0,000259 | 0,003668 | 2 |
| log.sigma.5.0.mm.3D_firstorder_Minimum                     | 5,803609 | 0,000263 | 0,003668 | 2 |
| original_glrlm_HighGrayLevelRunEmphasis                    | 5,782883 | 0,00027  | 0,003668 | 1 |
| original_glcml_Autocorrelation                             | 5,741047 | 0,000286 | 0,003668 | 1 |
| original_glszm_GrayLevelVariance                           | 5,766566 | 0,000276 | 0,003668 | 1 |
| original_gldm_LargeDependenceHighGrayLevelEmphasis         | 5,778669 | 0,000272 | 0,003668 | 1 |
| wavelet.HLL_glcml_DifferenceAverage                        | 5,730672 | 0,00029  | 0,003681 | 1 |
| wavelet.HLL_glrlm_RunLengthNonUniformityNormalized         | 5,722799 | 0,000294 | 0,003683 | 1 |
| wavelet.HLL_firstorder_RootMeanSquared                     | 5,660948 | 0,00032  | 0,003843 | 2 |
| log.sigma.1.0.mm.3D_firstorder_10Percentile                | 5,670274 | 0,000316 | 0,003843 | 2 |
| log.sigma.1.0.mm.3D_firstorder_RootMeanSquared             | 5,65677  | 0,000322 | 0,003843 | 2 |
| log.sigma.1.0.mm.3D_firstorder_Entropy                     | 5,682339 | 0,00031  | 0,003843 | 1 |
| log.sigma.2.0.mm.3D_glcml_Idm                              | 5,654958 | 0,000322 | 0,003843 | 2 |
| log.sigma.2.0.mm.3D_glcml_DifferenceVariance               | 5,647777 | 0,000326 | 0,003844 | 1 |
| wavelet.HLL_firstorder_MeanAbsoluteDeviation               | 5,627802 | 0,000335 | 0,003876 | 1 |
| wavelet.HLL_glrlm_ShortRunEmphasis                         | 5,627728 | 0,000335 | 0,003876 | 1 |
| log.sigma.1.0.mm.3D_firstorder_Variance                    | 5,579525 | 0,000358 | 0,004101 | 1 |
| original_glrlm_ShortRunHighGrayLevelEmphasis               | 5,573307 | 0,000361 | 0,004101 | 1 |
| wavelet.HLL_glrlm_GrayLevelNonUniformity                   | 5,503272 | 0,000398 | 0,00429  | 2 |
| wavelet.LLL_firstorder_Uniformity                          | 5,501418 | 0,000399 | 0,00429  | 2 |
| wavelet.LLL_glrlm_RunEntropy                               | 5,510349 | 0,000394 | 0,00429  | 1 |
| log.sigma.1.0.mm.3D_glszm_HighGrayLevelZoneEmphasis        | 5,514331 | 0,000392 | 0,00429  | 1 |
| log.sigma.4.0.mm.3D_firstorder_10Percentile                | 5,520373 | 0,000389 | 0,00429  | 2 |
| original_glrlm_GrayLevelNonUniformity                      | 5,502382 | 0,000399 | 0,00429  | 2 |
| wavelet.LLL_glcml_SumEntropy                               | 5,464567 | 0,00042  | 0,004477 | 1 |
| log.sigma.1.0.mm.3D_gldm_GrayLevelVariance                 | 5,441357 | 0,000434 | 0,004505 | 1 |
| log.sigma.2.0.mm.3D_glcml_DifferenceAverage                | 5,441299 | 0,000434 | 0,004505 | 1 |
| original_gldm_SmallDependenceEmphasis                      | 5,444827 | 0,000432 | 0,004505 | 1 |
| log.sigma.3.0.mm.3D_glcml_DifferenceEntropy                | 5,432205 | 0,00044  | 0,004524 | 1 |
| wavelet.LLH_glrlm_GrayLevelNonUniformity                   | 5,410212 | 0,000453 | 0,004626 | 2 |
| wavelet.LLL_firstorder_Entropy                             | 5,385451 | 0,000469 | 0,004657 | 1 |
| log.sigma.1.0.mm.3D_firstorder_Median                      | 5,398538 | 0,000461 | 0,004657 | 2 |
| log.sigma.2.0.mm.3D_firstorder_Uniformity                  | 5,381858 | 0,000472 | 0,004657 | 2 |
| log.sigma.2.0.mm.3D_glrlm_RunLengthNonUniformity           | 5,388063 | 0,000468 | 0,004657 | 1 |
| wavelet.HLL_glcml_DifferenceEntropy                        | 5,369708 | 0,00048  | 0,004698 | 1 |
| log.sigma.1.0.mm.3D_glrlm_GrayLevelNonUniformityNormalized | 5,360571 | 0,000486 | 0,004721 | 2 |
| wavelet.HLL_firstorder_Entropy                             | 5,314835 | 0,000519 | 0,004971 | 1 |
| wavelet.HLL_glrlm_GrayLevelVariance                        | 5,309038 | 0,000523 | 0,004971 | 1 |
| log.sigma.3.0.mm.3D_glcml_MaximumProbability               | 5,307117 | 0,000524 | 0,004971 | 2 |
| wavelet.LLH_glrlm_RunEntropy                               | 5,285895 | 0,00054  | 0,005043 | 1 |
| wavelet.HLL_glcml_Id                                       | 5,2882   | 0,000539 | 0,005043 | 2 |
| wavelet.HLL_firstorder_Minimum                             | 5,279992 | 0,000545 | 0,005046 | 2 |
| wavelet.HLL_glcml_JointEntropy                             | 5,252893 | 0,000566 | 0,005204 | 1 |
| wavelet.LLH_firstorder_Entropy                             | 5,247204 | 0,000571 | 0,005206 | 1 |
| log.sigma.3.0.mm.3D_firstorder_90Percentile                | 5,229083 | 0,000586 | 0,005294 | 2 |

|                                                               |          |          |          |   |
|---------------------------------------------------------------|----------|----------|----------|---|
| original_glrlm_GrayLevelNonUniformityNormalized               | 5,224772 | 0,000589 | 0,005294 | 2 |
| wavelet.HLL_glcm_Idm                                          | 5,207202 | 0,000604 | 0,005388 | 2 |
| wavelet.HLL_gldm_GrayLevelVariance                            | 5,180441 | 0,000628 | 0,005557 | 1 |
| log.sigma.1.0.mm.3D_glcm_lmc2                                 | 5,150121 | 0,000655 | 0,00576  | 1 |
| wavelet.LLH_glcm_JointEntropy                                 | 5,13237  | 0,000672 | 0,005865 | 1 |
| wavelet.LLL_glcm_JointEntropy                                 | 5,127353 | 0,000677 | 0,005865 | 1 |
| log.sigma.2.0.mm.3D_glcm_MaximumProbability                   | 5,099887 | 0,000704 | 0,006057 | 2 |
| wavelet.LLH_glcm_DifferenceAverage                            | 5,092525 | 0,000712 | 0,00606  | 1 |
| wavelet.LLL_glszm_GrayLevelNonUniformityNormalized            | 5,089563 | 0,000715 | 0,00606  | 2 |
| log.sigma.3.0.mm.3D_glcm_JointEnergy                          | 5,07512  | 0,00073  | 0,006104 | 2 |
| log.sigma.4.0.mm.3D_gldm_DependenceEntropy                    | 5,069992 | 0,000735 | 0,006104 | 1 |
| original_glcm_SumEntropy                                      | 5,074017 | 0,000731 | 0,006104 | 1 |
| original_firstorder_Range                                     | 5,056038 | 0,00075  | 0,006185 | 1 |
| wavelet.LLL_glrlm_RunLengthNonUniformity                      | 5,047549 | 0,000759 | 0,006219 | 1 |
| log.sigma.2.0.mm.3D_firstorder_Range                          | 5,038427 | 0,000769 | 0,006258 | 1 |
| log.sigma.1.0.mm.3D_gldm_SmallDependenceHighGrayLevelEmphasis | 5,007142 | 0,000805 | 0,006419 | 1 |
| log.sigma.3.0.mm.3D_glcm_DifferenceVariance                   | 5,006868 | 0,000805 | 0,006419 | 1 |
| original_firstorder_Entropy                                   | 5,00836  | 0,000803 | 0,006419 | 1 |
| wavelet.HLL_glrlm_RunPercentage                               | 4,990195 | 0,000825 | 0,006447 | 1 |
| wavelet.LLL_glcm_JointAverage                                 | 4,994478 | 0,00082  | 0,006447 | 1 |
| wavelet.LLL_gldm_DependenceEntropy                            | 4,9956   | 0,000818 | 0,006447 | 1 |
| wavelet.LLH_glcm_lmc2                                         | 4,96161  | 0,000859 | 0,006503 | 1 |
| wavelet.HLL_glcm_SumSquares                                   | 4,95351  | 0,00087  | 0,006503 | 1 |
| wavelet.LLL_glszm_ZoneEntropy                                 | 4,973734 | 0,000845 | 0,006503 | 1 |
| log.sigma.2.0.mm.3D_glrlm_RunVariance                         | 4,959237 | 0,000862 | 0,006503 | 2 |
| log.sigma.2.0.mm.3D_glcm_JointEnergy                          | 4,959135 | 0,000863 | 0,006503 | 2 |
| log.sigma.3.0.mm.3D_glrlm_RunVariance                         | 4,965135 | 0,000855 | 0,006503 | 2 |
| original_glcm_JointEntropy                                    | 4,956173 | 0,000866 | 0,006503 | 1 |
| log.sigma.2.0.mm.3D_firstorder_10Percentile                   | 4,919912 | 0,000913 | 0,006785 | 2 |
| wavelet.LLL_firstorder_Range                                  | 4,909378 | 0,000927 | 0,006848 | 1 |
| log.sigma.1.0.mm.3D_gldm_GrayLevelNonUniformity               | 4,896547 | 0,000944 | 0,006934 | 2 |
| original_glrlm_RunEntropy                                     | 4,889854 | 0,000954 | 0,006951 | 1 |
| original_glszm_GrayLevelNonUniformityNormalized               | 4,886549 | 0,000958 | 0,006951 | 2 |
| log.sigma.1.0.mm.3D_glcm_DifferenceEntropy                    | 4,880838 | 0,000966 | 0,006967 | 1 |
| wavelet.HLL_glcm_Contrast                                     | 4,87632  | 0,000973 | 0,006971 | 1 |
| wavelet.HLL_glcm_SumEntropy                                   | 4,865285 | 0,000988 | 0,006987 | 1 |
| original_firstorder_Uniformity                                | 4,862554 | 0,000992 | 0,006987 | 2 |
| original_glcm_Correlation                                     | 4,870179 | 0,000981 | 0,006987 | 1 |
| wavelet.LLL_glcm_lmc1                                         | 4,833731 | 0,001035 | 0,007245 | 2 |
| wavelet.HLL_glcm_ClusterTendency                              | 4,809931 | 0,001072 | 0,007457 | 1 |
| log.sigma.1.0.mm.3D_glcm_JointEntropy                         | 4,802842 | 0,001083 | 0,007492 | 1 |
| wavelet.LLH_firstorder_10Percentile                           | 4,787613 | 0,001107 | 0,007573 | 2 |
| log.sigma.2.0.mm.3D_gldm_DependenceEntropy                    | 4,791364 | 0,001101 | 0,007573 | 1 |
| original_gldm_LowGrayLevelEmphasis                            | 4,778047 | 0,001123 | 0,007637 | 2 |
| wavelet.LLL_glrlm_LongRunHighGrayLevelEmphasis                | 4,771153 | 0,001134 | 0,007667 | 1 |
| wavelet.LLL_glszm_GrayLevelVariance                           | 4,760123 | 0,001153 | 0,007667 | 1 |

|                                                               |          |          |          |   |
|---------------------------------------------------------------|----------|----------|----------|---|
| log.sigma.2.0.mm.3D_gldm_GrayLevelNonUniformity               | 4,766055 | 0,001143 | 0,007667 | 2 |
| log.sigma.3.0.mm.3D_gldm_SumEntropy                           | 4,762036 | 0,001149 | 0,007667 | 1 |
| log.sigma.1.0.mm.3D_glszm_ZonePercentage                      | 4,737639 | 0,001191 | 0,00788  | 1 |
| log.sigma.2.0.mm.3D_gldm_GrayLevelNonUniformity               | 4,721097 | 0,001221 | 0,00803  | 2 |
| wavelet.LHH_glszm_SizeZoneNonUniformity                       | 4,701431 | 0,001256 | 0,008133 | 1 |
| log.sigma.1.0.mm.3D_gldm_SumEntropy                           | 4,701881 | 0,001256 | 0,008133 | 1 |
| log.sigma.3.0.mm.3D_firstorder_10Percentile                   | 4,70629  | 0,001247 | 0,008133 | 2 |
| original_gldm_LongRunLowGrayLevelEmphasis                     | 4,690089 | 0,001278 | 0,008225 | 2 |
| original_gldm_LowGrayLevelRunEmphasis                         | 4,681685 | 0,001293 | 0,008283 | 2 |
| wavelet.LLL_gldm_HighGrayLevelEmphasis                        | 4,677804 | 0,001301 | 0,008287 | 1 |
| wavelet.LLL_gldm_HighGrayLevelRunEmphasis                     | 4,660084 | 0,001335 | 0,008367 | 1 |
| log.sigma.2.0.mm.3D_glszm_SizeZoneNonUniformityNormalized     | 4,657118 | 0,001341 | 0,008367 | 2 |
| log.sigma.3.0.mm.3D_gldm_LargeDependenceEmphasis              | 4,657964 | 0,001339 | 0,008367 | 2 |
| original_glszm_HighGrayLevelZoneEmphasis                      | 4,65878  | 0,001338 | 0,008367 | 1 |
| log.sigma.2.0.mm.3D_gldm_SmallDependenceHighGrayLevelEmphasis | 4,651349 | 0,001353 | 0,008395 | 1 |
| log.sigma.1.0.mm.3D_firstorder_MeanAbsoluteDeviation          | 4,640933 | 0,001374 | 0,008481 | 1 |
| log.sigma.1.0.mm.3D_gldm_DifferenceVariance                   | 4,633203 | 0,001389 | 0,008535 | 1 |
| log.sigma.2.0.mm.3D_gldm_Contrast                             | 4,628988 | 0,001398 | 0,008544 | 1 |
| wavelet.LLL_gldm_ShortRunHighGrayLevelEmphasis                | 4,622874 | 0,001411 | 0,008578 | 1 |
| wavelet.HLL_gldm_RunEntropy                                   | 4,598534 | 0,001463 | 0,00876  | 1 |
| wavelet.LLL_gldm_Correlation                                  | 4,600919 | 0,001457 | 0,00876  | 1 |
| original_gldm_DifferenceVariance                              | 4,601431 | 0,001456 | 0,00876  | 1 |
| log.sigma.3.0.mm.3D_gldm_JointEntropy                         | 4,591151 | 0,001479 | 0,008813 | 1 |
| wavelet.LLL_gldm_DifferenceEntropy                            | 4,580823 | 0,001501 | 0,008905 | 1 |
| wavelet.LHH_gldm_Contrast                                     | 4,572508 | 0,00152  | 0,008958 | 1 |
| wavelet.LLL_gldm_Autocorrelation                              | 4,566907 | 0,001533 | 0,008958 | 1 |
| original_gldm_ShortRunLowGrayLevelEmphasis                    | 4,569079 | 0,001528 | 0,008958 | 2 |
| log.sigma.3.0.mm.3D_firstorder_Uniformity                     | 4,562616 | 0,001543 | 0,008972 | 2 |
| log.sigma.3.0.mm.3D_firstorder_Entropy                        | 4,531122 | 0,001616 | 0,009329 | 1 |
| log.sigma.4.0.mm.3D_gldm_MaximumProbability                   | 4,529902 | 0,001619 | 0,009329 | 2 |
| wavelet.HLL_glszm_GrayLevelVariance                           | 4,515436 | 0,001655 | 0,009487 | 1 |
| wavelet.LHH_gldm_GrayLevelNonUniformityNormalized             | 4,508477 | 0,001672 | 0,009501 | 2 |
| log.sigma.1.0.mm.3D_gldm_SumSquares                           | 4,508083 | 0,001673 | 0,009501 | 1 |
| wavelet.LLL_gldm_SmallDependenceEmphasis                      | 4,48264  | 0,001738 | 0,009822 | 1 |
| wavelet.LLL_glszm_ZonePercentage                              | 4,474219 | 0,00176  | 0,009854 | 1 |
| log.sigma.1.0.mm.3D_gldm_ClusterTendency                      | 4,475408 | 0,001756 | 0,009854 | 1 |
| wavelet.LLL_glszm_SizeZoneNonUniformity                       | 4,464585 | 0,001785 | 0,009914 | 1 |
| wavelet.LLL_glszm_HighGrayLevelZoneEmphasis                   | 4,463932 | 0,001787 | 0,009914 | 1 |
| log.sigma.1.0.mm.3D_gldm_RunLengthNonUniformity               | 4,458238 | 0,001802 | 0,009953 | 1 |
| wavelet.LLL_gldm_JointEnergy                                  | 4,452387 | 0,001818 | 0,009995 | 2 |
| wavelet.LLL_gldm_RunLengthNonUniformityNormalized             | 4,433302 | 0,001871 | 0,010237 | 1 |
| wavelet.LLL_gldm_ShortRunEmphasis                             | 4,427721 | 0,001886 | 0,010269 | 1 |
| log.sigma.5.0.mm.3D_glszm_SmallAreaEmphasis                   | 4,422174 | 0,001902 | 0,010269 | 1 |
| original_gldm_LargeDependenceLowGrayLevelEmphasis             | 4,424337 | 0,001896 | 0,010269 | 2 |
| wavelet.LLL_gldm_DifferenceVariance                           | 4,413902 | 0,001926 | 0,010327 | 1 |
| original_gldm_DifferenceEntropy                               | 4,412458 | 0,00193  | 0,010327 | 1 |

|                                                            |          |          |          |   |
|------------------------------------------------------------|----------|----------|----------|---|
| wavelet.HLL_glszm_ZoneEntropy                              | 4,38274  | 0,002018 | 0,010751 | 1 |
| log.sigma.5.0.mm.3D_glszm_HighGrayLevelZoneEmphasis        | 4,371464 | 0,002052 | 0,010886 | 1 |
| original_glszm_ZonePercentage                              | 4,35923  | 0,002091 | 0,01104  | 1 |
| log.sigma.3.0.mm.3D_glrlm_RunPercentage                    | 4,35018  | 0,002119 | 0,011142 | 1 |
| wavelet.LLL_glcm_DifferenceAverage                         | 4,343294 | 0,002141 | 0,01121  | 1 |
| log.sigma.1.0.mm.3D_glrlm_RunLengthNonUniformityNormalized | 4,334775 | 0,002169 | 0,011257 | 1 |
| original_gldm_DependenceEntropy                            | 4,33604  | 0,002165 | 0,011257 | 1 |
| log.sigma.1.0.mm.3D_glrlm_ShortRunEmphasis                 | 4,317066 | 0,002228 | 0,011409 | 1 |
| log.sigma.1.0.mm.3D_gldm_SmallDependenceEmphasis           | 4,318333 | 0,002223 | 0,011409 | 1 |
| log.sigma.3.0.mm.3D_glcm_InverseVariance                   | 4,320441 | 0,002216 | 0,011409 | 1 |
| log.sigma.4.0.mm.3D_glrlm_LongRunEmphasis                  | 4,314529 | 0,002236 | 0,011409 | 2 |
| wavelet.HLL_firstorder_Range                               | 4,302473 | 0,002277 | 0,011569 | 1 |
| wavelet.HLL_firstorder_RobustMeanAbsoluteDeviation         | 4,299662 | 0,002287 | 0,01157  | 1 |
| log.sigma.2.0.mm.3D_glszm_HighGrayLevelZoneEmphasis        | 4,291659 | 0,002315 | 0,011661 | 1 |
| log.sigma.1.0.mm.3D_glszm_GrayLevelNonUniformityNormalized | 4,287585 | 0,002329 | 0,011685 | 2 |
| wavelet.LLL_glcm_Contrast                                  | 4,275142 | 0,002373 | 0,011857 | 1 |
| wavelet.LLH_gldm_SmallDependenceEmphasis                   | 4,242213 | 0,002495 | 0,012412 | 1 |
| wavelet.LLL_glszm_SmallAreaHighGrayLevelEmphasis           | 4,230579 | 0,002539 | 0,012581 | 1 |
| wavelet.LLH_firstorder_Mean                                | 4,215094 | 0,002599 | 0,012723 | 2 |
| wavelet.HLL_firstorder_Energy                              | 3,360276 | 0,002592 | 0,012723 | 2 |
| wavelet.HLL_firstorder_TotalEnergy                         | 3,360276 | 0,002592 | 0,012723 | 2 |
| log.sigma.4.0.mm.3D_glcm_JointEnergy                       | 4,209982 | 0,00262  | 0,01277  | 2 |
| original_glcm_Contrast                                     | 4,204737 | 0,002641 | 0,01282  | 1 |
| log.sigma.1.0.mm.3D_glcm_Contrast                          | 4,201783 | 0,002653 | 0,012826 | 1 |
| wavelet.HLL_glrlm_GrayLevelNonUniformityNormalized         | 4,186891 | 0,002713 | 0,013067 | 2 |
| wavelet.LLH_glcm_SumEntropy                                | 4,182382 | 0,002732 | 0,013105 | 1 |
| wavelet.HLH_firstorder_90Percentile                        | 4,17808  | 0,00275  | 0,013139 | 1 |
| wavelet.LLH_glszm_LargeAreaEmphasis                        | 4,175088 | 0,002763 | 0,013146 | 2 |
| wavelet.LLL_glcm_Id                                        | 4,154476 | 0,002851 | 0,013512 | 2 |
| log.sigma.3.0.mm.3D_glcm_Id                                | 4,148685 | 0,002876 | 0,013579 | 2 |
| wavelet.LLH_firstorder_Uniformity                          | 4,137992 | 0,002923 | 0,013648 | 2 |
| wavelet.LLH_glcm_Idm                                       | 4,138662 | 0,00292  | 0,013648 | 2 |
| log.sigma.5.0.mm.3D_glszm_SmallAreaHighGrayLevelEmphasis   | 4,137675 | 0,002925 | 0,013648 | 1 |
| wavelet.LLH_glcm_Id                                        | 4,131935 | 0,00295  | 0,013653 | 2 |
| wavelet.HLL_glcm_DifferenceVariance                        | 4,131175 | 0,002954 | 0,013653 | 1 |
| log.sigma.2.0.mm.3D_glszm_SizeZoneNonUniformity            | 4,129872 | 0,00296  | 0,013653 | 1 |
| wavelet.LLH_glszm_ZoneVariance                             | 4,111728 | 0,003043 | 0,013983 | 2 |
| log.sigma.3.0.mm.3D_glcm_Idm                               | 4,105523 | 0,003072 | 0,014037 | 2 |
| log.sigma.4.0.mm.3D_glcm_DifferenceVariance                | 4,103984 | 0,003079 | 0,014037 | 1 |
| original_glcm_JointEnergy                                  | 4,101768 | 0,003089 | 0,014037 | 2 |
| original_glszm_ZoneEntropy                                 | 4,097234 | 0,003111 | 0,014081 | 1 |
| wavelet.LLL_gldm_SmallDependenceHighGrayLevelEmphasis      | 4,085063 | 0,003169 | 0,014292 | 1 |
| log.sigma.1.0.mm.3D_firstorder_Uniformity                  | 4,063263 | 0,003277 | 0,014656 | 2 |
| log.sigma.4.0.mm.3D_glcm_DifferenceEntropy                 | 4,065532 | 0,003266 | 0,014656 | 1 |
| original_gldm_SmallDependenceHighGrayLevelEmphasis         | 4,061375 | 0,003287 | 0,014656 | 1 |
| wavelet.LLL_glcm_Idm                                       | 4,052837 | 0,00333  | 0,01474  | 2 |

|                                                         |          |          |          |   |
|---------------------------------------------------------|----------|----------|----------|---|
| log.sigma.4.0.mm.3D_glrlm_RunLengthNonUniformity        | 4,053838 | 0,003325 | 0,01474  | 1 |
| log.sigma.3.0.mm.3D_glcmm_DifferenceAverage             | 4,042674 | 0,003382 | 0,014916 | 1 |
| log.sigma.1.0.mm.3D_glcmm_DifferenceAverage             | 4,030401 | 0,003447 | 0,015145 | 1 |
| wavelet.HLL_glrlm_LongRunEmphasis                       | 4,019282 | 0,003506 | 0,015294 | 2 |
| original_glcmm_lmc1                                     | 4,02137  | 0,003495 | 0,015294 | 2 |
| wavelet.HLL_glszm_LargeAreaLowGrayLevelEmphasis         | 4,015351 | 0,003527 | 0,015331 | 2 |
| original_glcmm_DifferenceAverage                        | 4,002816 | 0,003596 | 0,015573 | 1 |
| log.sigma.3.0.mm.3D_glrlm_RunLengthNonUniformity        | 3,985436 | 0,003693 | 0,015938 | 1 |
| wavelet.LHL_glrlm_ShortRunLowGrayLevelEmphasis          | 3,977259 | 0,00374  | 0,01596  | 2 |
| wavelet.LHL_gldm_LowGrayLevelEmphasis                   | 3,976475 | 0,003745 | 0,01596  | 2 |
| log.sigma.4.0.mm.3D_firstorder_Uniformity               | 3,976523 | 0,003744 | 0,01596  | 2 |
| original_glrlm_ShortRunEmphasis                         | 3,975298 | 0,003752 | 0,01596  | 1 |
| original_glszm_LargeAreaEmphasis                        | 3,966336 | 0,003804 | 0,016125 | 2 |
| wavelet.LHL_glrlm_LowGrayLevelRunEmphasis               | 3,957825 | 0,003854 | 0,016264 | 2 |
| wavelet.LLL_glrlm_RunPercentage                         | 3,951884 | 0,003889 | 0,016264 | 1 |
| log.sigma.1.0.mm.3D_glrlm_ShortRunHighGrayLevelEmphasis | 3,951715 | 0,00389  | 0,016264 | 1 |
| original_glszm_LargeAreaLowGrayLevelEmphasis            | 3,953339 | 0,003881 | 0,016264 | 2 |
| wavelet.LLH_gldm_GrayLevelNonUniformity                 | 3,941634 | 0,003951 | 0,016351 | 2 |
| wavelet.HLL_firstorder_Uniformity                       | 3,939322 | 0,003966 | 0,016351 | 2 |
| wavelet.HLL_gldm_LargeDependenceEmphasis                | 3,940927 | 0,003956 | 0,016351 | 2 |
| log.sigma.4.0.mm.3D_glcmm_Contrast                      | 3,940355 | 0,003959 | 0,016351 | 1 |
| wavelet.LLH_firstorder_RootMeanSquared                  | 3,929956 | 0,004023 | 0,016533 | 2 |
| wavelet.HLL_glcmm_JointAverage                          | 3,920573 | 0,004082 | 0,016718 | 1 |
| log.sigma.4.0.mm.3D_glcmm_SumEntropy                    | 3,904858 | 0,004183 | 0,017071 | 1 |
| wavelet.HHH_glszm_ZoneEntropy                           | 3,899482 | 0,004218 | 0,017073 | 1 |
| original_glrlm_RunLengthNonUniformityNormalized         | 3,9024   | 0,004199 | 0,017073 | 1 |
| original_glcmm_lmcn                                     | 3,898261 | 0,004226 | 0,017073 | 1 |
| log.sigma.3.0.mm.3D_glrlm_LongRunLowGrayLevelEmphasis   | 3,894835 | 0,004248 | 0,017106 | 2 |
| log.sigma.3.0.mm.3D_glrlm_ShortRunEmphasis              | 3,879626 | 0,004349 | 0,017455 | 1 |
| wavelet.LLL_gldm_LargeDependenceHighGrayLevelEmphasis   | 3,867493 | 0,004432 | 0,017669 | 1 |
| log.sigma.3.0.mm.3D_firstorder_Minimum                  | 3,868483 | 0,004425 | 0,017669 | 2 |
| wavelet.LLH_glcmm_SumSquares                            | 3,859787 | 0,004485 | 0,017764 | 1 |
| log.sigma.4.0.mm.3D_glcmm_JointEntropy                  | 3,860145 | 0,004483 | 0,017764 | 1 |
| log.sigma.4.0.mm.3D_glrlm_ShortRunEmphasis              | 3,853229 | 0,004531 | 0,017887 | 1 |
| wavelet.LLL_gldm_DependenceNonUniformity                | 3,848181 | 0,004567 | 0,017969 | 1 |
| log.sigma.2.0.mm.3D_glrlm_ShortRunHighGrayLevelEmphasis | 3,837527 | 0,004643 | 0,018178 | 1 |
| original_gldm_DependenceNonUniformity                   | 3,836545 | 0,00465  | 0,018178 | 1 |
| wavelet.HLL_firstorder_InterquartileRange               | 3,826364 | 0,004724 | 0,018408 | 1 |
| original_glszm_ZoneVariance                             | 3,800329 | 0,00492  | 0,019107 | 2 |
| wavelet.LLH_firstorder_MeanAbsoluteDeviation            | 3,7963   | 0,004951 | 0,019166 | 1 |
| log.sigma.2.0.mm.3D_firstorder_MeanAbsoluteDeviation    | 3,78908  | 0,005007 | 0,01932  | 1 |
| log.sigma.2.0.mm.3D_firstorder_Skewness                 | 3,779472 | 0,005082 | 0,019487 | 2 |
| log.sigma.4.0.mm.3D_firstorder_Minimum                  | 3,779492 | 0,005082 | 0,019487 | 2 |
| wavelet.HLH_glrlm_GrayLevelNonUniformity                | 3,758927 | 0,005248 | 0,020058 | 2 |
| log.sigma.3.0.mm.3D_gldm_GrayLevelNonUniformity         | 3,756222 | 0,00527  | 0,020079 | 2 |
| log.sigma.1.0.mm.3D_glrlm_HighGrayLevelRunEmphasis      | 3,753765 | 0,00529  | 0,020093 | 1 |

|                                                            |          |          |          |   |
|------------------------------------------------------------|----------|----------|----------|---|
| log.sigma.1.0.mm.3D_glrlm_LongRunEmphasis                  | 3,748079 | 0,005337 | 0,020208 | 2 |
| original_glszm_SmallAreaHighGrayLevelEmphasis              | 3,745093 | 0,005362 | 0,020239 | 1 |
| wavelet.HLL_glszm_GrayLevelNonUniformityNormalized         | 3,738165 | 0,005421 | 0,020332 | 2 |
| log.sigma.3.0.mm.3D_glcmm_Contrast                         | 3,738154 | 0,005421 | 0,020332 | 1 |
| wavelet.LHL_glrlm_LongRunLowGrayLevelEmphasis              | 3,728915 | 0,0055   | 0,020383 | 2 |
| wavelet.HLL_gldm_DependenceNonUniformityNormalized         | 3,730278 | 0,005488 | 0,020383 | 1 |
| wavelet.LLL_glcmm_InverseVariance                          | 3,732935 | 0,005465 | 0,020383 | 2 |
| log.sigma.3.0.mm.3D_glcmm_Idn                              | 3,726684 | 0,005519 | 0,020383 | 2 |
| original_glrlm_GrayLevelVariance                           | 3,727883 | 0,005509 | 0,020383 | 1 |
| log.sigma.4.0.mm.3D_glrlm_RunPercentage                    | 3,713758 | 0,005632 | 0,020736 | 1 |
| log.sigma.4.0.mm.3D_firstorder_Entropy                     | 3,710255 | 0,005663 | 0,020786 | 1 |
| log.sigma.1.0.mm.3D_glcmm_Idm                              | 3,704293 | 0,005716 | 0,020917 | 2 |
| log.sigma.3.0.mm.3D_glrlm_GrayLevelNonUniformityNormalized | 3,698026 | 0,005772 | 0,02106  | 2 |
| wavelet.LLH_glrlm_LongRunEmphasis                          | 3,694158 | 0,005807 | 0,021124 | 2 |
| log.sigma.2.0.mm.3D_glszm_LowGrayLevelZoneEmphasis         | 3,690578 | 0,00584  | 0,021178 | 2 |
| wavelet.HLH_glszm_ZoneEntropy                              | 3,682369 | 0,005916 | 0,021388 | 1 |
| log.sigma.1.0.mm.3D_glcmm_Correlation                      | 3,673675 | 0,005997 | 0,021617 | 1 |
| log.sigma.4.0.mm.3D_glcmm_DifferenceAverage                | 3,669981 | 0,006032 | 0,021678 | 1 |
| wavelet.HLL_glszm_ZoneVariance                             | 3,641543 | 0,006307 | 0,022575 | 2 |
| original_glszm_LowGrayLevelZoneEmphasis                    | 3,640364 | 0,006319 | 0,022575 | 2 |
| log.sigma.4.0.mm.3D_gldm_LargeDependenceEmphasis           | 3,636213 | 0,00636  | 0,022656 | 2 |
| wavelet.LLH_glrlm_RunPercentage                            | 3,632635 | 0,006396 | 0,022717 | 1 |
| original_glcmm_Idm                                         | 3,622004 | 0,006504 | 0,023032 | 2 |
| log.sigma.4.0.mm.3D_glcmm_Idm                              | 3,613606 | 0,006591 | 0,023235 | 2 |
| log.sigma.4.0.mm.3D_gldm_DependenceNonUniformityNormalized | 3,612699 | 0,0066   | 0,023235 | 2 |
| original_glcmm_Id                                          | 3,606152 | 0,006668 | 0,023407 | 2 |
| wavelet.HLL_glszm_LargeAreaEmphasis                        | 3,601249 | 0,00672  | 0,02345  | 2 |
| wavelet.LLL_firstorder_MeanAbsoluteDeviation               | 3,599464 | 0,006739 | 0,02345  | 1 |
| log.sigma.2.0.mm.3D_firstorder_RobustMeanAbsoluteDeviation | 3,601167 | 0,006721 | 0,02345  | 1 |
| wavelet.LLH_glrlm_ShortRunEmphasis                         | 3,594226 | 0,006795 | 0,023508 | 1 |
| log.sigma.1.0.mm.3D_glcmm_Id                               | 3,59534  | 0,006783 | 0,023508 | 2 |
| original_glcmm_Idn                                         | 3,582506 | 0,006922 | 0,023878 | 1 |
| wavelet.HLL_glcmm_Imc2                                     | 3,579409 | 0,006955 | 0,023927 | 1 |
| log.sigma.4.0.mm.3D_glcmm_Id                               | 3,572947 | 0,007027 | 0,024063 | 2 |
| original_firstorder_MeanAbsoluteDeviation                  | 3,572189 | 0,007035 | 0,024063 | 1 |
| wavelet.LLL_glrlm_LongRunEmphasis                          | 3,568254 | 0,007079 | 0,024144 | 2 |
| log.sigma.1.0.mm.3D_gldm_HighGrayLevelEmphasis             | 3,556695 | 0,007209 | 0,02452  | 1 |
| wavelet.HLH_firstorder_Variance                            | 3,54999  | 0,007286 | 0,024711 | 1 |
| wavelet.LLH_glcmm_DifferenceVariance                       | 3,54513  | 0,007342 | 0,024762 | 1 |
| log.sigma.2.0.mm.3D_glrlm_HighGrayLevelRunEmphasis         | 3,546276 | 0,007329 | 0,024762 | 1 |
| wavelet.HLH_glcmm_SumEntropy                               | 3,53983  | 0,007404 | 0,024901 | 1 |
| log.sigma.2.0.mm.3D_firstorder_InterquartileRange          | 3,534107 | 0,007471 | 0,024918 | 1 |
| log.sigma.2.0.mm.3D_glrlm_GrayLevelVariance                | 3,53423  | 0,00747  | 0,024918 | 1 |
| log.sigma.5.0.mm.3D_glrlm_RunLengthNonUniformity           | 3,536952 | 0,007438 | 0,024918 | 1 |
| wavelet.HLH_glszm_ZonePercentage                           | 3,52773  | 0,007547 | 0,025101 | 1 |
| original_firstorder_Variance                               | 3,518806 | 0,007654 | 0,025388 | 1 |



|                                                            |          |          |          |   |
|------------------------------------------------------------|----------|----------|----------|---|
| wavelet.LHH_gldm_SmallDependenceEmphasis                   | 3,516015 | 0,007688 | 0,02543  | 1 |
| wavelet.HLH_gldm_DifferenceEntropy                         | 3,507363 | 0,007794 | 0,02571  | 1 |
| wavelet.LLH_glrlm_RunLengthNonUniformityNormalized         | 3,504844 | 0,007825 | 0,025743 | 1 |
| log.sigma.3.0.mm.3D_gldm_DependenceNonUniformityNormalized | 3,482866 | 0,008103 | 0,02651  | 2 |
| original_glrlm_RunPercentage                               | 3,483155 | 0,008099 | 0,02651  | 1 |
| wavelet.HLH_gldm_GrayLevelNonUniformity                    | 3,474828 | 0,008207 | 0,026778 | 2 |
| log.sigma.2.0.mm.3D_gldm_JointAverage                      | 3,471652 | 0,008248 | 0,02684  | 1 |
| log.sigma.3.0.mm.3D_glrlm_RunLengthNonUniformityNormalized | 3,462629 | 0,008367 | 0,027154 | 1 |
| log.sigma.1.0.mm.3D_glrlm_RunPercentage                    | 3,458325 | 0,008425 | 0,027267 | 1 |
| original_glrlm_LongRunEmphasis                             | 3,4546   | 0,008475 | 0,027355 | 2 |
| log.sigma.2.0.mm.3D_gldm_HighGrayLevelEmphasis             | 3,450793 | 0,008526 | 0,027447 | 1 |
| wavelet.HLL_gldm_JointEnergy                               | 3,445677 | 0,008596 | 0,027524 | 2 |
| wavelet.LLL_gldm_DependenceNonUniformityNormalized         | 3,445988 | 0,008591 | 0,027524 | 1 |
| wavelet.HLH_gldm_JointEntropy                              | 3,442456 | 0,00864  | 0,027592 | 1 |
| original_gldm_GrayLevelVariance                            | 3,438355 | 0,008696 | 0,027699 | 1 |
| log.sigma.1.0.mm.3D_gldm_ClusterProminence                 | 3,431909 | 0,008786 | 0,02791  | 1 |
| log.sigma.4.0.mm.3D_gldm_SumSquares                        | 3,427373 | 0,008849 | 0,028039 | 1 |
| wavelet.HLH_gldm_SmallDependenceEmphasis                   | 3,416417 | 0,009005 | 0,028457 | 1 |
| wavelet.LLH_gldm_ClusterTendency                           | 3,410792 | 0,009086 | 0,028563 | 1 |
| log.sigma.5.0.mm.3D_glrlm_LongRunEmphasis                  | 3,411628 | 0,009074 | 0,028563 | 2 |
| log.sigma.4.0.mm.3D_gldm_InverseVariance                   | 3,406108 | 0,009154 | 0,028702 | 1 |
| wavelet.HLH_gldm_JointEnergy                               | 3,398898 | 0,00926  | 0,028958 | 2 |
| wavelet.LLL_glszm_LargeAreaEmphasis                        | 3,386323 | 0,009447 | 0,029391 | 2 |
| log.sigma.1.0.mm.3D_firstorder_InterquartileRange          | 3,387106 | 0,009435 | 0,029391 | 1 |
| log.sigma.2.0.mm.3D_glszm_SmallAreaHighGrayLevelEmphasis   | 3,37857  | 0,009565 | 0,02968  | 1 |
| wavelet.LLH_firstorder_Median                              | 3,370316 | 0,009691 | 0,029996 | 2 |
| log.sigma.4.0.mm.3D_glszm_LargeAreaEmphasis                | 2,809951 | 0,009813 | 0,030294 | 2 |
| wavelet.HLL_glrlm_HighGrayLevelRunEmphasis                 | 3,355409 | 0,009925 | 0,030561 | 1 |
| wavelet.HLL_gldm_HighGrayLevelEmphasis                     | 3,352716 | 0,009967 | 0,030614 | 1 |
| wavelet.HLH_glrlm_GrayLevelNonUniformityNormalized         | 3,348208 | 0,01004  | 0,030757 | 2 |
| wavelet.LLH_gldm_JointEnergy                               | 3,343398 | 0,010117 | 0,030899 | 2 |
| wavelet.HLL_glrlm_ShortRunHighGrayLevelEmphasis            | 3,342147 | 0,010137 | 0,030899 | 1 |
| log.sigma.1.0.mm.3D_gldm_JointAverage                      | 3,334633 | 0,01026  | 0,031193 | 1 |
| log.sigma.1.0.mm.3D_firstorder_Maximum                     | 3,320239 | 0,010499 | 0,031839 | 1 |
| log.sigma.5.0.mm.3D_glrlm_GrayLevelVariance                | 3,31831  | 0,010531 | 0,031857 | 1 |
| log.sigma.5.0.mm.3D_gldm_GrayLevelVariance                 | 3,314627 | 0,010593 | 0,031965 | 1 |
| wavelet.HLL_gldm_DependenceNonUniformity                   | 3,308256 | 0,010702 | 0,032212 | 1 |
| wavelet.LLH_glszm_ZonePercentage                           | 3,301839 | 0,010812 | 0,032223 | 1 |
| wavelet.LLH_gldm_GrayLevelVariance                         | 3,30273  | 0,010797 | 0,032223 | 1 |
| wavelet.LLH_gldm_DependenceNonUniformityNormalized         | 3,30327  | 0,010788 | 0,032223 | 1 |
| wavelet.HLH_firstorder_Entropy                             | 3,306256 | 0,010736 | 0,032223 | 1 |
| wavelet.HLL_glszm_GrayLevelNonUniformityNormalized         | 3,295146 | 0,010929 | 0,032489 | 2 |
| log.sigma.2.0.mm.3D_gldm_Autocorrelation                   | 3,29131  | 0,010996 | 0,032609 | 1 |
| log.sigma.4.0.mm.3D_gldm_ClusterTendency                   | 3,287016 | 0,011072 | 0,032754 | 1 |
| wavelet.LLL_gldm_LargeDependenceEmphasis                   | 3,281356 | 0,011173 | 0,03289  | 2 |
| log.sigma.5.0.mm.3D_glszm_GrayLevelVariance                | 3,282399 | 0,011154 | 0,03289  | 1 |

|                                                              |          |          |          |   |
|--------------------------------------------------------------|----------|----------|----------|---|
| wavelet.HLL_gldm_LargeDependenceLowGrayLevelEmphasis         | 3,272027 | 0,011341 | 0,033143 | 2 |
| log.sigma.1.0.mm.3D_glcm_Autocorrelation                     | 3,272489 | 0,011333 | 0,033143 | 1 |
| original_glcm_SumSquares                                     | 3,274935 | 0,011288 | 0,033143 | 1 |
| wavelet.LLH_glrlm_RunVariance                                | 3,265505 | 0,01146  | 0,03333  | 2 |
| wavelet.HLL_glcm_Autocorrelation                             | 3,265729 | 0,011456 | 0,03333  | 1 |
| wavelet.HLH_glrlm_RunEntropy                                 | 3,262115 | 0,011523 | 0,033431 | 1 |
| log.sigma.1.0.mm.3D_glszm_ZoneEntropy                        | 3,254537 | 0,011664 | 0,033758 | 1 |
| wavelet.LLL_glrlm_GrayLevelVariance                          | 3,250159 | 0,011746 | 0,033915 | 1 |
| wavelet.HLL_glrlm_LongRunHighGrayLevelEmphasis               | 3,245162 | 0,011841 | 0,034106 | 1 |
| wavelet.HLL_glszm_SmallAreaLowGrayLevelEmphasis              | 3,241051 | 0,011919 | 0,03425  | 2 |
| log.sigma.1.0.mm.3D_firstorder_RobustMeanAbsoluteDeviation   | 3,231783 | 0,012098 | 0,034681 | 1 |
| wavelet.HLL_glszm_GrayLevelNonUniformity                     | 3,228435 | 0,012163 | 0,034712 | 2 |
| log.sigma.5.0.mm.3D_firstorder_MeanAbsoluteDeviation         | 3,226802 | 0,012195 | 0,034712 | 1 |
| log.sigma.5.0.mm.3D_glrlm_RunLengthNonUniformityNormalized   | 3,227297 | 0,012186 | 0,034712 | 1 |
| wavelet.LLL_glszm_ZoneVariance                               | 3,222705 | 0,012276 | 0,034777 | 2 |
| log.sigma.4.0.mm.3D_gldm_GrayLevelVariance                   | 3,222785 | 0,012274 | 0,034777 | 1 |
| wavelet.HLL_glrlm_RunVariance                                | 3,195627 | 0,012822 | 0,036239 | 2 |
| wavelet.LHL_glcm_JointAverage                                | 3,191899 | 0,012899 | 0,036289 | 1 |
| wavelet.HLL_gldm_DependenceEntropy                           | 3,191868 | 0,0129   | 0,036289 | 1 |
| log.sigma.1.0.mm.3D_glrlm_RunVariance                        | 3,18648  | 0,013012 | 0,03652  | 2 |
| wavelet.LHL_glszm_LowGrayLevelZoneEmphasis                   | 3,180009 | 0,013149 | 0,036816 | 2 |
| log.sigma.5.0.mm.3D_firstorder_Variance                      | 3,177559 | 0,013201 | 0,036876 | 1 |
| wavelet.HLL_firstorder_Skewness                              | 3,175792 | 0,013238 | 0,036896 | 2 |
| log.sigma.4.0.mm.3D_glrlm_RunLengthNonUniformityNormalized   | 3,16827  | 0,0134   | 0,037259 | 1 |
| wavelet.LLL_firstorder_Variance                              | 3,163033 | 0,013513 | 0,037489 | 1 |
| log.sigma.1.0.mm.3D_gldm_DependenceEntropy                   | 3,161424 | 0,013548 | 0,037496 | 1 |
| log.sigma.5.0.mm.3D_glcm_SumSquares                          | 3,160058 | 0,013578 | 0,037496 | 1 |
| wavelet.LLL_gldm_GrayLevelVariance                           | 3,140055 | 0,014024 | 0,038637 | 1 |
| log.sigma.5.0.mm.3D_firstorder_Range                         | 3,119169 | 0,014505 | 0,039871 | 1 |
| wavelet.LLH_gldm_DependenceEntropy                           | 3,116822 | 0,01456  | 0,039931 | 1 |
| log.sigma.4.0.mm.3D_glszm_GrayLevelVariance                  | 3,111509 | 0,014685 | 0,040184 | 1 |
| wavelet.LLH_glszm_LargeAreaLowGrayLevelEmphasis              | 3,106542 | 0,014804 | 0,040416 | 2 |
| wavelet.HLL_glszm_HighGrayLevelZoneEmphasis                  | 3,101021 | 0,014936 | 0,040686 | 1 |
| log.sigma.1.0.mm.3D_glszm_LargeAreaLowGrayLevelEmphasis      | 3,093155 | 0,015127 | 0,041114 | 2 |
| original_glcm_ClusterTendency                                | 3,091552 | 0,015167 | 0,041128 | 1 |
| log.sigma.2.0.mm.3D_gldm_GrayLevelVariance                   | 3,088941 | 0,015231 | 0,041209 | 1 |
| wavelet.LLH_firstorder_Variance                              | 3,087382 | 0,015269 | 0,04122  | 1 |
| log.sigma.5.0.mm.3D_gldm_LargeDependenceEmphasis             | 3,07721  | 0,015523 | 0,041811 | 2 |
| log.sigma.4.0.mm.3D_glrlm_ShortRunLowGrayLevelEmphasis       | 3,074677 | 0,015587 | 0,041889 | 2 |
| wavelet.HHH_glcm_ClusterShade                                | 2,999634 | 0,015699 | 0,042098 | 2 |
| log.sigma.3.0.mm.3D_gldm_LargeDependenceLowGrayLevelEmphasis | 3,067189 | 0,015777 | 0,042211 | 2 |
| wavelet.LLL_firstorder_RobustMeanAbsoluteDeviation           | 3,050897 | 0,016198 | 0,043244 | 1 |
| wavelet.LLL_glcm_SumSquares                                  | 3,047245 | 0,016295 | 0,043404 | 1 |
| log.sigma.1.0.mm.3D_glszm_LowGrayLevelZoneEmphasis           | 3,02897  | 0,016785 | 0,044611 | 2 |
| log.sigma.5.0.mm.3D_glrlm_RunPercentage                      | 3,015517 | 0,017155 | 0,045495 | 1 |
| log.sigma.1.0.mm.3D_glszm_LargeAreaEmphasis                  | 3,007518 | 0,017379 | 0,045988 | 2 |

|                                                            |          |          |          |      |
|------------------------------------------------------------|----------|----------|----------|------|
| log.sigma.5.0.mm.3D_glcml_ClusterTendency                  | 2,997016 | 0,017678 | 0,046676 | 1    |
| log.sigma.1.0.mm.3D_glszm_ZoneVariance                     | 2,993899 | 0,017768 | 0,046811 | 2    |
| wavelet.LLH_glrml_GrayLevelVariance                        | 2,982961 | 0,018086 | 0,047453 | 1    |
| log.sigma.5.0.mm.3D_firstorder_InterquartileRange          | 2,982819 | 0,018091 | 0,047453 | 1    |
| wavelet.LHL_glrml_HighGrayLevelRunEmphasis                 | 2,980833 | 0,018149 | 0,047503 | 1    |
| wavelet.LLH_gldm_LargeDependenceEmphasis                   | 2,973551 | 0,018365 | 0,047861 | 2    |
| wavelet.LHL_glrml_LongRunHighGrayLevelEmphasis             | 2,97458  | 0,018334 | 0,047861 | 1    |
| wavelet.LHL_gldm_HighGrayLevelEmphasis                     | 2,970469 | 0,018457 | 0,047973 | 1    |
| log.sigma.4.0.mm.3D_glrml_GrayLevelNonUniformityNormalized | 2,969451 | 0,018488 | 0,047973 | 2    |
| log.sigma.3.0.mm.3D_glszm_LowGrayLevelZoneEmphasis         | 2,959602 | 0,018787 | 0,048643 | 2    |
| original_glrml_RunVariance                                 | 2,955903 | 0,0189   | 0,048832 | 2    |
| log.sigma.5.0.mm.3D_firstorder_RobustMeanAbsoluteDeviation | 2,953754 | 0,018966 | 0,048898 | 1    |
| wavelet.LLH_firstorder_Uniformity                          | 2,934921 | 0,019557 | 0,050312 | n.s. |
| wavelet.LHH_firstorder_Energy                              | 2,512795 | 0,019668 | 0,050383 | n.s. |
| wavelet.LHH_firstorder_TotalEnergy                         | 2,512795 | 0,019668 | 0,050383 | n.s. |
| wavelet.LHL_glrml_ShortRunHighGrayLevelEmphasis            | 2,928691 | 0,019756 | 0,050394 | n.s. |
| log.sigma.2.0.mm.3D_glrml_LongRunLowGrayLevelEmphasis      | 2,929598 | 0,019727 | 0,050394 | n.s. |
| wavelet.LHL_glcml_Autocorrelation                          | 2,912912 | 0,02027  | 0,051535 | n.s. |
| wavelet.LLL_glrml_RunVariance                              | 2,911436 | 0,020319 | 0,051535 | n.s. |
| log.sigma.4.0.mm.3D_glrml_GrayLevelVariance                | 2,911062 | 0,020332 | 0,051535 | n.s. |
| log.sigma.2.0.mm.3D_glcml_lmc2                             | 2,898248 | 0,020761 | 0,052513 | n.s. |
| wavelet.LLL_glcml_ClusterTendency                          | 2,895386 | 0,020858 | 0,052648 | n.s. |
| wavelet.LLL_firstorder_InterquartileRange                  | 2,887788 | 0,021118 | 0,052942 | n.s. |
| log.sigma.1.0.mm.3D_glrml_LongRunHighGrayLevelEmphasis     | 2,888175 | 0,021105 | 0,052942 | n.s. |
| log.sigma.1.0.mm.3D_glcml_JointEnergy                      | 2,886273 | 0,02117  | 0,052942 | n.s. |
| log.sigma.4.0.mm.3D_glrml_LongRunLowGrayLevelEmphasis      | 2,885575 | 0,021194 | 0,052942 | n.s. |
| log.sigma.5.0.mm.3D_glcml_Contrast                         | 2,888792 | 0,021083 | 0,052942 | n.s. |
| log.sigma.4.0.mm.3D_glcml_lmc2                             | 2,881404 | 0,021339 | 0,053193 | n.s. |
| log.sigma.3.0.mm.3D_firstorder_MeanAbsoluteDeviation       | 2,875729 | 0,021538 | 0,053467 | n.s. |
| original_firstorder_RobustMeanAbsoluteDeviation            | 2,876055 | 0,021526 | 0,053467 | n.s. |
| wavelet.LLH_glszm_HighGrayLevelZoneEmphasis                | 2,873539 | 0,021615 | 0,053548 | n.s. |
| original_firstorder_InterquartileRange                     | 2,851222 | 0,022417 | 0,055421 | n.s. |
| log.sigma.2.0.mm.3D_glcml_SumSquares                       | 2,849522 | 0,022479 | 0,055462 | n.s. |
| wavelet.LHL_gldm_LargeDependenceHighGrayLevelEmphasis      | 2,847941 | 0,022538 | 0,055491 | n.s. |
| wavelet.LLL_glcml_MaximumProbability                       | 2,839718 | 0,022842 | 0,056127 | n.s. |
| wavelet.LLH_glcml_InverseVariance                          | 2,836864 | 0,022949 | 0,056275 | n.s. |
| original_glcml_ClusterProminence                           | 2,833556 | 0,023074 | 0,056465 | n.s. |
| original_glcml_InverseVariance                             | 2,827817 | 0,023291 | 0,056882 | n.s. |
| log.sigma.2.0.mm.3D_firstorder_Variance                    | 2,8224   | 0,023498 | 0,057272 | n.s. |
| log.sigma.5.0.mm.3D_glcml_DifferenceAverage                | 2,810765 | 0,02395  | 0,058254 | n.s. |
| wavelet.LLH_firstorder_RobustMeanAbsoluteDeviation         | 2,802502 | 0,024276 | 0,058928 | n.s. |
| log.sigma.4.0.mm.3D_gldm_SmallDependenceEmphasis           | 2,800627 | 0,024351 | 0,05899  | n.s. |
| log.sigma.5.0.mm.3D_glcml_ldm                              | 2,795129 | 0,024571 | 0,059404 | n.s. |
| log.sigma.4.0.mm.3D_firstorder_Variance                    | 2,784317 | 0,02501  | 0,060223 | n.s. |
| log.sigma.5.0.mm.3D_glcml_ld                               | 2,784702 | 0,024994 | 0,060223 | n.s. |
| wavelet.LHL_firstorder_Skewness                            | 2,722371 | 0,025214 | 0,060535 | n.s. |

|                                                               |          |          |          |      |
|---------------------------------------------------------------|----------|----------|----------|------|
| log.sigma.1.0.mm.3D_glcm_Idmn                                 | 2,778726 | 0,02524  | 0,060535 | n.s. |
| wavelet.LHL_gldm_LargeDependenceHighGrayLevelEmphasis         | 2,773175 | 0,02547  | 0,060966 | n.s. |
| log.sigma.4.0.mm.3D_glszm_ZoneEntropy                         | 2,76418  | 0,025848 | 0,061749 | n.s. |
| log.sigma.3.0.mm.3D_firstorder_Range                          | 2,757372 | 0,026138 | 0,062318 | n.s. |
| wavelet.LHL_glszm_HighGrayLevelZoneEmphasis                   | 2,754954 | 0,026242 | 0,062442 | n.s. |
| log.sigma.3.0.mm.3D_firstorder_RobustMeanAbsoluteDeviation    | 2,745559 | 0,02665  | 0,063286 | n.s. |
| wavelet.HLL_gldm_SmallDependenceEmphasis                      | 2,741318 | 0,026835 | 0,063477 | n.s. |
| log.sigma.5.0.mm.3D_glcm_InverseVariance                      | 2,742316 | 0,026792 | 0,063477 | n.s. |
| log.sigma.1.0.mm.3D_gldm_LargeDependenceEmphasis              | 2,73763  | 0,026998 | 0,063737 | n.s. |
| wavelet.HLH_glrlm_RunLengthNonUniformity                      | 2,731087 | 0,02729  | 0,064299 | n.s. |
| wavelet.HLL_glrlm_LongRunLowGrayLevelEmphasis                 | 2,723983 | 0,02761  | 0,064926 | n.s. |
| log.sigma.2.0.mm.3D_glrlm_RunEntropy                          | 2,713116 | 0,028106 | 0,065965 | n.s. |
| wavelet.LLL_glszm_LargeAreaLowGrayLevelEmphasis               | 2,703071 | 0,028574 | 0,066802 | n.s. |
| log.sigma.4.0.mm.3D_firstorder_InterquartileRange             | 2,70329  | 0,028564 | 0,066802 | n.s. |
| log.sigma.4.0.mm.3D_firstorder_MeanAbsoluteDeviation          | 2,696563 | 0,028881 | 0,067388 | n.s. |
| log.sigma.2.0.mm.3D_glcm_Idn                                  | 2,687701 | 0,029304 | 0,068244 | n.s. |
| wavelet.HLH_glcm_MaximumProbability                           | 2,68334  | 0,029515 | 0,068602 | n.s. |
| wavelet.HLL_glcm_MaximumProbability                           | 2,67684  | 0,029832 | 0,069205 | n.s. |
| log.sigma.5.0.mm.3D_firstorder_Entropy                        | 2,669425 | 0,030198 | 0,069919 | n.s. |
| wavelet.LHL_gldm_SmallDependenceLowGrayLevelEmphasis          | 2,659287 | 0,030705 | 0,070552 | n.s. |
| log.sigma.1.0.mm.3D_gldm_LargeDependenceHighGrayLevelEmphasis | 2,661256 | 0,030606 | 0,070552 | n.s. |
| log.sigma.2.0.mm.3D_glcm_ClusterTendency                      | 2,661998 | 0,030569 | 0,070552 | n.s. |
| log.sigma.3.0.mm.3D_glrlm_ShortRunLowGrayLevelEmphasis        | 2,659433 | 0,030698 | 0,070552 | n.s. |
| log.sigma.2.0.mm.3D_glszm_GrayLevelVariance                   | 2,653599 | 0,030994 | 0,070944 | n.s. |
| log.sigma.2.0.mm.3D_gldm_DependenceVariance                   | 2,65459  | 0,030943 | 0,070944 | n.s. |
| wavelet.HLL_glcm_Imc1                                         | 2,651131 | 0,03112  | 0,071097 | n.s. |
| log.sigma.4.0.mm.3D_firstorder_RobustMeanAbsoluteDeviation    | 2,644855 | 0,031443 | 0,071699 | n.s. |
| wavelet.HLL_firstorder_Median                                 | 2,63784  | 0,031808 | 0,07213  | n.s. |
| log.sigma.3.0.mm.3D_glszm_SizeZoneNonUniformityNormalized     | 2,637768 | 0,031811 | 0,07213  | n.s. |
| log.sigma.5.0.mm.3D_glcm_JointEntropy                         | 2,63791  | 0,031804 | 0,07213  | n.s. |
| wavelet.HLH_glcm_Idm                                          | 2,63177  | 0,032127 | 0,072708 | n.s. |
| log.sigma.5.0.mm.3D_glrlm_ShortRunEmphasis                    | 2,625386 | 0,032466 | 0,073338 | n.s. |
| wavelet.LHL_glszm_SmallAreaHighGrayLevelEmphasis              | 2,620726 | 0,032716 | 0,073626 | n.s. |
| original_gldm_LargeDependenceEmphasis                         | 2,621596 | 0,032669 | 0,073626 | n.s. |
| wavelet.LLH_glrlm_RunLengthNonUniformity                      | 2,612738 | 0,033149 | 0,074462 | n.s. |
| log.sigma.5.0.mm.3D_glcm_SumEntropy                           | 2,606061 | 0,033515 | 0,075145 | n.s. |
| wavelet.HLH_glrlm_GrayLevelVariance                           | 2,599205 | 0,033896 | 0,075857 | n.s. |
| wavelet.HLH_glcm_Id                                           | 2,590427 | 0,03439  | 0,076818 | n.s. |
| wavelet.LHL_gldm_LargeDependenceLowGrayLevelEmphasis          | 2,573672 | 0,035352 | 0,078677 | n.s. |
| log.sigma.4.0.mm.3D_glcm_Idn                                  | 2,57368  | 0,035352 | 0,078677 | n.s. |
| wavelet.HHH_glszm_SmallAreaEmphasis                           | 2,569158 | 0,035616 | 0,078972 | n.s. |
| log.sigma.3.0.mm.3D_glrlm_LowGrayLevelRunEmphasis             | 2,569418 | 0,035601 | 0,078972 | n.s. |
| wavelet.HLL_firstorder_90Percentile                           | 2,56752  | 0,035712 | 0,07904  | n.s. |
| log.sigma.2.0.mm.3D_gldm_LargeDependenceLowGrayLevelEmphasis  | 2,56139  | 0,036075 | 0,079696 | n.s. |
| wavelet.HLH_glcm_DifferenceAverage                            | 2,543713 | 0,037142 | 0,081903 | n.s. |
| wavelet.LLH_firstorder_InterquartileRange                     | 2,540875 | 0,037316 | 0,082137 | n.s. |

|                                                               |          |          |          |      |
|---------------------------------------------------------------|----------|----------|----------|------|
| wavelet.HLL_glcml_ClusterProminence                           | 2,53563  | 0,03764  | 0,082699 | n.s. |
| wavelet.HLH_glrml_ShortRunEmphasis                            | 2,534406 | 0,037716 | 0,082715 | n.s. |
| log.sigma.3.0.mm.3D_firstorder_InterquartileRange             | 2,529431 | 0,038027 | 0,083101 | n.s. |
| log.sigma.3.0.mm.3D_glcml_lmc2                                | 2,529383 | 0,03803  | 0,083101 | n.s. |
| wavelet.LLH_firstorder_Minimum                                | 2,527692 | 0,038137 | 0,083182 | n.s. |
| wavelet.LHH_firstorder_Median                                 | 2,524747 | 0,038322 | 0,083285 | n.s. |
| log.sigma.4.0.mm.3D_gldm_GrayLevelNonUniformity               | 2,524907 | 0,038312 | 0,083285 | n.s. |
| wavelet.HLL_firstorder_Kurtosis                               | 2,520205 | 0,03861  | 0,08376  | n.s. |
| log.sigma.5.0.mm.3D_gldm_SmallDependenceHighGrayLevelEmphasis | 2,517738 | 0,038768 | 0,083951 | n.s. |
| wavelet.LLH_glrml_ShortRunHighGrayLevelEmphasis               | 2,512068 | 0,039132 | 0,084588 | n.s. |
| log.sigma.3.0.mm.3D_glszm_ZoneEntropy                         | 2,504705 | 0,039611 | 0,085468 | n.s. |
| wavelet.LHL_firstorder_Minimum                                | 2,492807 | 0,040396 | 0,087008 | n.s. |
| wavelet.HLL_glszm_LowGrayLevelZoneEmphasis                    | 2,487925 | 0,040723 | 0,087478 | n.s. |
| log.sigma.5.0.mm.3D_firstorder_Uniformity                     | 2,487377 | 0,04076  | 0,087478 | n.s. |
| original_gldm_DependenceNonUniformityNormalized               | 2,483583 | 0,041016 | 0,087871 | n.s. |
| wavelet.HLH_glcml_DifferenceVariance                          | 2,481412 | 0,041164 | 0,08803  | n.s. |
| wavelet.LLL_glrml_LongRunLowGrayLevelEmphasis                 | 2,475336 | 0,041579 | 0,08876  | n.s. |
| log.sigma.5.0.mm.3D_glcml_DifferenceVariance                  | 2,472197 | 0,041795 | 0,089043 | n.s. |
| log.sigma.5.0.mm.3D_glcml_DifferenceEntropy                   | 2,471263 | 0,041859 | 0,089043 | n.s. |
| log.sigma.5.0.mm.3D_gldm_DependenceEntropy                    | 2,457604 | 0,042814 | 0,090915 | n.s. |
| original_firstorder_Skewness                                  | 2,456309 | 0,042906 | 0,090949 | n.s. |
| wavelet.HLH_glszm_LargeAreaEmphasis                           | 2,447881 | 0,043508 | 0,091901 | n.s. |
| log.sigma.3.0.mm.3D_gldm_GrayLevelVariance                    | 2,448569 | 0,043458 | 0,091901 | n.s. |
| log.sigma.5.0.mm.3D_glszm_LargeAreaEmphasis                   | 2,435393 | 0,044415 | 0,093652 | n.s. |
| log.sigma.3.0.mm.3D_glrml_RunEntropy                          | 2,433079 | 0,044585 | 0,093847 | n.s. |
| log.sigma.5.0.mm.3D_glrml_GrayLevelNonUniformityNormalized    | 2,420789 | 0,0455   | 0,095605 | n.s. |
| wavelet.HHL_glcml_ClusterShade                                | 2,417997 | 0,04571  | 0,09588  | n.s. |
| log.sigma.4.0.mm.3D_firstorder_Range                          | 2,416428 | 0,045829 | 0,095962 | n.s. |
| wavelet.LLL_glrml_LowGrayLevelRunEmphasis                     | 2,412278 | 0,046145 | 0,096455 | n.s. |
| wavelet.LHH_glszm_GrayLevelNonUniformity                      | 2,409298 | 0,046372 | 0,096763 | n.s. |
| log.sigma.3.0.mm.3D_glcml_SumSquares                          | 2,407459 | 0,046514 | 0,09689  | n.s. |
| wavelet.LLL_gldm_LowGrayLevelEmphasis                         | 2,406369 | 0,046597 | 0,096897 | n.s. |
| wavelet.LLH_glrml_HighGrayLevelRunEmphasis                    | 2,404788 | 0,046719 | 0,096983 | n.s. |
| log.sigma.3.0.mm.3D_glrml_GrayLevelVariance                   | 2,402043 | 0,046932 | 0,097257 | n.s. |
| log.sigma.2.0.mm.3D_glszm_LargeAreaEmphasis                   | 2,397308 | 0,047301 | 0,097853 | n.s. |
| wavelet.HLL_glcml_Correlation                                 | 2,391262 | 0,047776 | 0,098329 | n.s. |
| log.sigma.1.0.mm.3D_glrml_LongRunLowGrayLevelEmphasis         | 2,391714 | 0,04774  | 0,098329 | n.s. |
| log.sigma.4.0.mm.3D_glrml_RunVariance                         | 2,393317 | 0,047614 | 0,098329 | n.s. |
| wavelet.HLH_gldm_GrayLevelVariance                            | 2,387826 | 0,048048 | 0,09872  | n.s. |
| wavelet.LLL_glcml_ClusterProminence                           | 2,385003 | 0,048273 | 0,099013 | n.s. |
| wavelet.HHL_glszm_GrayLevelNonUniformity                      | 2,383433 | 0,048399 | 0,099102 | n.s. |
| wavelet.LLL_gldm_LargeDependenceLowGrayLevelEmphasis          | 2,381047 | 0,04859  | 0,099325 | n.s. |
| wavelet.LLL_glrml_ShortRunLowGrayLevelEmphasis                | 2,371299 | 0,04938  | 0,100708 | n.s. |
| log.sigma.1.0.mm.3D_glszm_SmallAreaEmphasis                   | 2,370632 | 0,049434 | 0,100708 | n.s. |
| wavelet.HLH_glcml_SumSquares                                  | 2,368119 | 0,04964  | 0,100957 | n.s. |
| wavelet.LHH_glszm_ZonePercentage                              | 2,363379 | 0,050031 | 0,10158  | n.s. |

|                                                              |          |          |          |      |
|--------------------------------------------------------------|----------|----------|----------|------|
| log.sigma.5.0.mm.3D_gldm_DependenceNonUniformityNormalized   | 2,360692 | 0,050254 | 0,101861 | n.s. |
| log.sigma.3.0.mm.3D_glrlm_GrayLevelNonUniformity             | 2,358967 | 0,050397 | 0,10198  | n.s. |
| wavelet.LLH_gldm_JointAverage                                | 2,351084 | 0,051059 | 0,102741 | n.s. |
| wavelet.LLH_gldm_HighGrayLevelEmphasis                       | 2,349938 | 0,051156 | 0,102741 | n.s. |
| wavelet.LHH_firstorder_RootMeanSquared                       | 2,348707 | 0,05126  | 0,102741 | n.s. |
| wavelet.HLH_gldm_ClusterTendency                             | 2,348411 | 0,051285 | 0,102741 | n.s. |
| log.sigma.1.0.mm.3D_gldm_lmc1                                | 2,351599 | 0,051015 | 0,102741 | n.s. |
| log.sigma.4.0.mm.3D_glrlm_LowGrayLevelRunEmphasis            | 2,351346 | 0,051037 | 0,102741 | n.s. |
| wavelet.HLL_gldm_LowGrayLevelEmphasis                        | 2,346619 | 0,051437 | 0,102875 | n.s. |
| original_gldm_MaximumProbability                             | 2,345525 | 0,05153  | 0,10289  | n.s. |
| wavelet.HLH_gldm_Contrast                                    | 2,343603 | 0,051695 | 0,103047 | n.s. |
| wavelet.HLH_glrlm_RunPercentage                              | 2,342552 | 0,051785 | 0,103056 | n.s. |
| wavelet.HLL_gldm_SmallDependenceHighGrayLevelEmphasis        | 2,339798 | 0,052021 | 0,103355 | n.s. |
| log.sigma.4.0.mm.3D_glrlm_ShortRunHighGrayLevelEmphasis      | 2,332167 | 0,052682 | 0,104496 | n.s. |
| wavelet.LHL_gldm_SmallDependenceHighGrayLevelEmphasis        | 2,327221 | 0,053115 | 0,105181 | n.s. |
| log.sigma.3.0.mm.3D_gldm_LowGrayLevelEmphasis                | 2,317364 | 0,053988 | 0,106736 | n.s. |
| log.sigma.5.0.mm.3D_glrlm_RunVariance                        | 2,314742 | 0,054223 | 0,107024 | n.s. |
| wavelet.HLL_glrlm_LowGrayLevelRunEmphasis                    | 2,301828 | 0,055394 | 0,109157 | n.s. |
| wavelet.LHH_firstorder_Mean                                  | 2,289087 | 0,056575 | 0,111301 | n.s. |
| log.sigma.3.0.mm.3D_gldm_ClusterTendency                     | 2,284698 | 0,056987 | 0,111929 | n.s. |
| wavelet.HHL_glszm_ZoneVariance                               | 2,277275 | 0,057692 | 0,112945 | n.s. |
| log.sigma.1.0.mm.3D_glrlm_ShortRunLowGrayLevelEmphasis       | 2,27732  | 0,057687 | 0,112945 | n.s. |
| wavelet.LHL_firstorder_Mean                                  | 2,272509 | 0,058149 | 0,113654 | n.s. |
| log.sigma.1.0.mm.3D_glrlm_LowGrayLevelRunEmphasis            | 2,24996  | 0,06036  | 0,117761 | n.s. |
| log.sigma.1.0.mm.3D_gldm_DependenceNonUniformity             | 2,249106 | 0,060445 | 0,117761 | n.s. |
| log.sigma.1.0.mm.3D_gldm_DependenceNonUniformityNormalized   | 2,242995 | 0,06106  | 0,118766 | n.s. |
| wavelet.HLH_glszm_GrayLevelNonUniformity                     | 2,236318 | 0,061738 | 0,119892 | n.s. |
| log.sigma.5.0.mm.3D_glrlm_ShortRunHighGrayLevelEmphasis      | 2,229706 | 0,062418 | 0,121016 | n.s. |
| log.sigma.5.0.mm.3D_gldm_MaximumProbability                  | 2,216668 | 0,063779 | 0,123457 | n.s. |
| log.sigma.3.0.mm.3D_firstorder_Variance                      | 2,210161 | 0,06447  | 0,124594 | n.s. |
| wavelet.HLL_glszm_ZonePercentage                             | 2,207597 | 0,064744 | 0,124923 | n.s. |
| log.sigma.4.0.mm.3D_gldm_ClusterProminence                   | 2,204989 | 0,065024 | 0,125263 | n.s. |
| log.sigma.5.0.mm.3D_gldm_lmc2                                | 2,201433 | 0,065408 | 0,125801 | n.s. |
| wavelet.HHH_firstorder_Median                                | 2,158144 | 0,066485 | 0,127611 | n.s. |
| log.sigma.4.0.mm.3D_glszm_HighGrayLevelZoneEmphasis          | 2,190049 | 0,066652 | 0,127611 | n.s. |
| log.sigma.5.0.mm.3D_gldm_JointEnergy                         | 2,189914 | 0,066667 | 0,127611 | n.s. |
| wavelet.HHH_glszm_ZonePercentage                             | 2,18833  | 0,066842 | 0,127743 | n.s. |
| wavelet.LLH_gldm_Autocorrelation                             | 2,184854 | 0,067228 | 0,128276 | n.s. |
| log.sigma.1.0.mm.3D_gldm_LowGrayLevelEmphasis                | 2,182947 | 0,06744  | 0,128464 | n.s. |
| log.sigma.5.0.mm.3D_gldm_GrayLevelNonUniformity              | 2,18206  | 0,06754  | 0,128464 | n.s. |
| wavelet.LHL_firstorder_RootMeanSquared                       | 2,17939  | 0,067839 | 0,128818 | n.s. |
| log.sigma.3.0.mm.3D_gldm_DependenceVariance                  | 2,178491 | 0,06794  | 0,128818 | n.s. |
| log.sigma.2.0.mm.3D_glszm_ZoneVariance                       | 2,177208 | 0,068084 | 0,128889 | n.s. |
| log.sigma.1.0.mm.3D_gldm_LargeDependenceLowGrayLevelEmphasis | 2,169727 | 0,068932 | 0,13029  | n.s. |
| log.sigma.4.0.mm.3D_glrlm_HighGrayLevelRunEmphasis           | 2,159949 | 0,070057 | 0,132207 | n.s. |
| log.sigma.5.0.mm.3D_glszm_LargeAreaLowGrayLevelEmphasis      | 2,156011 | 0,070515 | 0,132863 | n.s. |

|                                                               |          |          |          |      |
|---------------------------------------------------------------|----------|----------|----------|------|
| wavelet.HLH_glszm_SmallAreaLowGrayLevelEmphasis               | 2,146334 | 0,071653 | 0,134797 | n.s. |
| wavelet.HLL_glrlm_ShortRunLowGrayLevelEmphasis                | 2,145373 | 0,071767 | 0,134801 | n.s. |
| log.sigma.4.0.mm.3D_glszm_SizeZoneNonUniformityNormalized     | 2,14044  | 0,072355 | 0,135694 | n.s. |
| wavelet.HHL_glszm_LargeAreaEmphasis                           | 2,134344 | 0,073089 | 0,136856 | n.s. |
| wavelet.LHH_gldm_SmallDependenceHighGrayLevelEmphasis         | 2,129498 | 0,073677 | 0,137744 | n.s. |
| wavelet.HLH_glrlm_LongRunEmphasis                             | 2,127885 | 0,073874 | 0,137898 | n.s. |
| wavelet.HLH_glszm_ZoneVariance                                | 2,126226 | 0,074077 | 0,138063 | n.s. |
| wavelet.HLL_firstorder_Maximum                                | 2,123905 | 0,074362 | 0,13838  | n.s. |
| wavelet.HLH_glszm_GrayLevelVariance                           | 2,11104  | 0,075961 | 0,141138 | n.s. |
| log.sigma.4.0.mm.3D_gldm_SmallDependenceLowGrayLevelEmphasis  | 2,102315 | 0,077065 | 0,142969 | n.s. |
| log.sigma.2.0.mm.3D_glszm_GrayLevelNonUniformityNormalized    | 2,096434 | 0,077818 | 0,144144 | n.s. |
| wavelet.LLH_gldm_SmallDependenceHighGrayLevelEmphasis         | 2,088647 | 0,078827 | 0,145788 | n.s. |
| wavelet.HHH_glszm_SizeZoneNonUniformityNormalized             | 2,053786 | 0,079502 | 0,146586 | n.s. |
| log.sigma.4.0.mm.3D_glszm_GrayLevelNonUniformityNormalized    | 2,083526 | 0,079497 | 0,146586 | n.s. |
| wavelet.HLH_glrlm_RunLengthNonUniformityNormalized            | 2,07025  | 0,081261 | 0,149601 | n.s. |
| wavelet.HLL_glszm_SmallAreaHighGrayLevelEmphasis              | 2,061984 | 0,082379 | 0,151427 | n.s. |
| log.sigma.2.0.mm.3D_glrlm_LowGrayLevelRunEmphasis             | 2,05905  | 0,08278  | 0,151931 | n.s. |
| wavelet.HHH_gldm_DependenceVariance                           | 2,055183 | 0,083311 | 0,152673 | n.s. |
| log.sigma.4.0.mm.3D_glszm_ZonePercentage                      | 2,049973 | 0,084031 | 0,153759 | n.s. |
| wavelet.LLL_firstorder_Skewness                               | 2,046546 | 0,084508 | 0,154397 | n.s. |
| log.sigma.4.0.mm.3D_glszm_LargeAreaLowGrayLevelEmphasis       | 2,043542 | 0,084929 | 0,15493  | n.s. |
| wavelet.LLH_gldm_DependenceNonUniformity                      | 2,033143 | 0,0864   | 0,157377 | n.s. |
| log.sigma.2.0.mm.3D_gldm_LowGrayLevelEmphasis                 | 2,015211 | 0,088997 | 0,161862 | n.s. |
| wavelet.HHH_firstorder_Mean                                   | 2,007049 | 0,090205 | 0,16381  | n.s. |
| log.sigma.3.0.mm.3D_gldm_ClusterProminence                    | 2,003695 | 0,090706 | 0,164472 | n.s. |
| log.sigma.3.0.mm.3D_gldm_SmallDependenceEmphasis              | 1,986638 | 0,093295 | 0,168914 | n.s. |
| log.sigma.3.0.mm.3D_glszm_LargeAreaEmphasis                   | 1,982149 | 0,093989 | 0,169913 | n.s. |
| wavelet.HHH_firstorder_RootMeanSquared                        | 1,980682 | 0,094216 | 0,17007  | n.s. |
| wavelet.LLH_gldm_Imc1                                         | 1,975368 | 0,095046 | 0,17131  | n.s. |
| log.sigma.4.0.mm.3D_glszm_SizeZoneNonUniformity               | 1,974141 | 0,095239 | 0,171401 | n.s. |
| wavelet.LHL_gldm_Idmn                                         | 1,969278 | 0,096005 | 0,17201  | n.s. |
| log.sigma.4.0.mm.3D_gldm_ClusterShade                         | 1,969287 | 0,096004 | 0,17201  | n.s. |
| log.sigma.4.0.mm.3D_gldm_LargeDependenceLowGrayLevelEmphasis  | 1,970507 | 0,095811 | 0,17201  | n.s. |
| wavelet.LLH_glszm_SmallAreaHighGrayLevelEmphasis              | 1,965743 | 0,096567 | 0,172247 | n.s. |
| wavelet.LHL_glszm_SmallAreaLowGrayLevelEmphasis               | 1,967425 | 0,096299 | 0,172247 | n.s. |
| log.sigma.4.0.mm.3D_gldm_SmallDependenceHighGrayLevelEmphasis | 1,966157 | 0,096501 | 0,172247 | n.s. |
| wavelet.HLL_gldm_SmallDependenceLowGrayLevelEmphasis          | 1,956026 | 0,098126 | 0,17477  | n.s. |
| wavelet.LHL_gldm_DependenceNonUniformity                      | 1,947447 | 0,099524 | 0,176216 | n.s. |
| wavelet.LHH_gldm_DifferenceVariance                           | 1,949908 | 0,099121 | 0,176216 | n.s. |
| wavelet.HLH_firstorder_Maximum                                | 1,948567 | 0,09934  | 0,176216 | n.s. |
| log.sigma.5.0.mm.3D_glrlm_LongRunLowGrayLevelEmphasis         | 1,948107 | 0,099416 | 0,176216 | n.s. |
| wavelet.LHH_gldm_DifferenceEntropy                            | 1,943742 | 0,100133 | 0,177034 | n.s. |
| wavelet.LHH_glszm_GrayLevelVariance                           | 1,939975 | 0,100757 | 0,177876 | n.s. |
| wavelet.HLH_gldm_LargeDependenceEmphasis                      | 1,933927 | 0,101766 | 0,179394 | n.s. |
| wavelet.HHH_gldm_SmallDependenceEmphasis                      | 1,932971 | 0,101926 | 0,179414 | n.s. |
| log.sigma.2.0.mm.3D_gldm_ClusterProminence                    | 1,929336 | 0,102538 | 0,179965 | n.s. |

|                                                               |          |          |          |      |
|---------------------------------------------------------------|----------|----------|----------|------|
| log.sigma.3.0.mm.3D_glszm_HighGrayLevelZoneEmphasis           | 1,930075 | 0,102414 | 0,179965 | n.s. |
| log.sigma.3.0.mm.3D_gldm_SmallDependenceLowGrayLevelEmphasis  | 1,924205 | 0,103408 | 0,181228 | n.s. |
| wavelet.LLH_glszm_SmallAreaLowGrayLevelEmphasis               | 1,916784 | 0,10468  | 0,183189 | n.s. |
| wavelet.HHH_glszm_SizeZoneNonUniformity                       | 1,914389 | 0,105093 | 0,183646 | n.s. |
| log.sigma.3.0.mm.3D_glszm_ZoneVariance                        | 1,913386 | 0,105267 | 0,183683 | n.s. |
| wavelet.LHL_glrlm_RunLengthNonUniformity                      | 1,910692 | 0,105735 | 0,184232 | n.s. |
| log.sigma.4.0.mm.3D_gldm_HighGrayLevelEmphasis                | 1,904892 | 0,106749 | 0,185731 | n.s. |
| log.sigma.2.0.mm.3D_gldm_LargeDependenceHighGrayLevelEmphasis | 1,902972 | 0,107087 | 0,186049 | n.s. |
| wavelet.LHH_glcm_MaximumProbability                           | 1,867489 | 0,11352  | 0,196943 | n.s. |
| log.sigma.3.0.mm.3D_glszm_LargeAreaLowGrayLevelEmphasis       | 1,854225 | 0,11602  | 0,200991 | n.s. |
| wavelet.LHH_glszm_SmallAreaHighGrayLevelEmphasis              | 1,851664 | 0,116509 | 0,201548 | n.s. |
| wavelet.HLL_glcm_InverseVariance                              | 1,846125 | 0,117573 | 0,203097 | n.s. |
| log.sigma.1.0.mm.3D_firstorder_Skewness                       | 1,843111 | 0,118156 | 0,203811 | n.s. |
| wavelet.LLL_glszm_LowGrayLevelZoneEmphasis                    | 1,83885  | 0,118986 | 0,204948 | n.s. |
| log.sigma.4.0.mm.3D_glrlm_RunEntropy                          | 1,827505 | 0,12122  | 0,208499 | n.s. |
| wavelet.LHH_glszm_SmallAreaEmphasis                           | 1,824162 | 0,121887 | 0,209346 | n.s. |
| wavelet.LLH_gldm_LargeDependenceLowGrayLevelEmphasis          | 1,823214 | 0,122076 | 0,209373 | n.s. |
| wavelet.HHL_firstorder_Skewness                               | 1,820629 | 0,122595 | 0,209963 | n.s. |
| log.sigma.5.0.mm.3D_glcm_Imc1                                 | 1,814459 | 0,123841 | 0,211796 | n.s. |
| wavelet.LLH_glcm_MaximumProbability                           | 1,811069 | 0,124531 | 0,212629 | n.s. |
| log.sigma.4.0.mm.3D_glcm_JointAverage                         | 1,810333 | 0,124681 | 0,212629 | n.s. |
| wavelet.LLH_glrlm_LongRunHighGrayLevelEmphasis                | 1,80878  | 0,124999 | 0,212869 | n.s. |
| wavelet.LLH_glszm_GrayLevelNonUniformityNormalized            | 1,804544 | 0,125869 | 0,213746 | n.s. |
| wavelet.LHL_glcm_ClusterShade                                 | 1,783634 | 0,125851 | 0,213746 | n.s. |
| log.sigma.5.0.mm.3D_gldm_SmallDependenceEmphasis              | 1,802052 | 0,126384 | 0,214318 | n.s. |
| wavelet.HHH_glszm_GrayLevelNonUniformity                      | 1,800723 | 0,126659 | 0,214483 | n.s. |
| log.sigma.3.0.mm.3D_gldm_DependenceNonUniformity              | 1,797557 | 0,127317 | 0,215295 | n.s. |
| log.sigma.5.0.mm.3D_glcm_ClusterShade                         | 1,795415 | 0,127765 | 0,215748 | n.s. |
| wavelet.LHH_glcm_Contrast                                     | 1,792027 | 0,128475 | 0,216644 | n.s. |
| wavelet.LLH_glszm_LowGrayLevelZoneEmphasis                    | 1,786165 | 0,129713 | 0,218181 | n.s. |
| log.sigma.1.0.mm.3D_glcm_Idn                                  | 1,78584  | 0,129782 | 0,218181 | n.s. |
| log.sigma.4.0.mm.3D_gldm_LowGrayLevelEmphasis                 | 1,785145 | 0,12993  | 0,218181 | n.s. |
| log.sigma.2.0.mm.3D_firstorder_Maximum                        | 1,784075 | 0,130158 | 0,218259 | n.s. |
| log.sigma.1.0.mm.3D_glcm_ClusterShade                         | 1,781079 | 0,130797 | 0,219026 | n.s. |
| wavelet.LLH_glrlm_LongRunLowGrayLevelEmphasis                 | 1,777987 | 0,13146  | 0,21967  | n.s. |
| original_firstorder_Minimum                                   | 1,777585 | 0,131547 | 0,21967  | n.s. |
| log.sigma.3.0.mm.3D_glszm_LargeAreaHighGrayLevelEmphasis      | 1,638071 | 0,132066 | 0,220232 | n.s. |
| log.sigma.2.0.mm.3D_glcm_Correlation                          | 1,766517 | 0,133948 | 0,223062 | n.s. |
| log.sigma.3.0.mm.3D_glszm_ZonePercentage                      | 1,760178 | 0,135343 | 0,225073 | n.s. |
| wavelet.LLH_firstorder_Range                                  | 1,754575 | 0,136587 | 0,226516 | n.s. |
| log.sigma.5.0.mm.3D_glszm_SmallAreaLowGrayLevelEmphasis       | 1,755006 | 0,136491 | 0,226516 | n.s. |
| log.sigma.5.0.mm.3D_glcm_Idn                                  | 1,749047 | 0,137825 | 0,228255 | n.s. |
| log.sigma.2.0.mm.3D_firstorder_90Percentile                   | 1,739874 | 0,139904 | 0,23138  | n.s. |
| log.sigma.3.0.mm.3D_glrlm_ShortRunHighGrayLevelEmphasis       | 1,738137 | 0,140301 | 0,231718 | n.s. |
| original_glszm_SmallAreaLowGrayLevelEmphasis                  | 1,736286 | 0,140725 | 0,2321   | n.s. |
| wavelet.LHL_firstorder_Energy                                 | 1,601882 | 0,142005 | 0,232934 | n.s. |



|                                                              |          |          |          |      |
|--------------------------------------------------------------|----------|----------|----------|------|
| wavelet.LHL_firstorder_TotalEnergy                           | 1,601882 | 0,142005 | 0,232934 | n.s. |
| log.sigma.1.0.mm.3D_gldm_SmallDependenceLowGrayLevelEmphasis | 1,733178 | 0,14144  | 0,232934 | n.s. |
| log.sigma.3.0.mm.3D_gldm_JointAverage                        | 1,732317 | 0,141639 | 0,232934 | n.s. |
| log.sigma.4.0.mm.3D_gldm_Imc1                                | 1,719972 | 0,144517 | 0,236733 | n.s. |
| wavelet.HHH_glszm_LargeAreaLowGrayLevelEmphasis              | 1,709286 | 0,147054 | 0,240293 | n.s. |
| log.sigma.2.0.mm.3D_gldm_ShortRunLowGrayLevelEmphasis        | 1,709137 | 0,14709  | 0,240293 | n.s. |
| log.sigma.4.0.mm.3D_glszm_LowGrayLevelZoneEmphasis           | 1,707587 | 0,147461 | 0,240574 | n.s. |
| original_glszm_SizeZoneNonUniformity                         | 1,69779  | 0,149831 | 0,244109 | n.s. |
| wavelet.LHH_gldm_DifferenceAverage                           | 1,688872 | 0,152019 | 0,247339 | n.s. |
| wavelet.LHL_firstorder_Median                                | 1,684122 | 0,153197 | 0,248919 | n.s. |
| log.sigma.2.0.mm.3D_glszm_LargeAreaLowGrayLevelEmphasis      | 1,676719 | 0,15505  | 0,251591 | n.s. |
| wavelet.LLL_gldm_Idmn                                        | 1,664091 | 0,15826  | 0,256152 | n.s. |
| log.sigma.2.0.mm.3D_gldm_LongRunHighGrayLevelEmphasis        | 1,663989 | 0,158287 | 0,256152 | n.s. |
| log.sigma.3.0.mm.3D_gldm_HighGrayLevelRunEmphasis            | 1,658045 | 0,15982  | 0,258286 | n.s. |
| wavelet.HLL_glszm_SizeZoneNonUniformity                      | 1,655936 | 0,160367 | 0,258554 | n.s. |
| wavelet.LLL_firstorder_Kurtosis                              | 1,655751 | 0,160415 | 0,258554 | n.s. |
| wavelet.HLH_gldm_RunVariance                                 | 1,640667 | 0,164383 | 0,264595 | n.s. |
| wavelet.LHH_gldm_JointEntropy                                | 1,631472 | 0,166847 | 0,268009 | n.s. |
| log.sigma.1.0.mm.3D_gldm_InverseVariance                     | 1,630847 | 0,167016 | 0,268009 | n.s. |
| log.sigma.3.0.mm.3D_gldm_HighGrayLevelEmphasis               | 1,63027  | 0,167172 | 0,268009 | n.s. |
| wavelet.HLL_gldm_DependenceVariance                          | 1,624779 | 0,168662 | 0,270039 | n.s. |
| log.sigma.2.0.mm.3D_gldm_SmallDependenceLowGrayLevelEmphasis | 1,62395  | 0,168888 | 0,270042 | n.s. |
| wavelet.HHH_firstorder_Energy                                | 1,621475 | 0,169565 | 0,270406 | n.s. |
| wavelet.HHH_firstorder_TotalEnergy                           | 1,621475 | 0,169565 | 0,270406 | n.s. |
| wavelet.HLH_gldm_DependenceEntropy                           | 1,617534 | 0,170648 | 0,271773 | n.s. |
| log.sigma.4.0.mm.3D_gldm_Autocorrelation                     | 1,613126 | 0,171868 | 0,273353 | n.s. |
| log.sigma.5.0.mm.3D_glszm_ZoneEntropy                        | 1,589704 | 0,178484 | 0,283502 | n.s. |
| wavelet.LHH_gldm_Idm                                         | 1,588801 | 0,178744 | 0,283541 | n.s. |
| wavelet.LHL_glszm_LargeAreaHighGrayLevelEmphasis             | 1,587857 | 0,179016 | 0,283598 | n.s. |
| wavelet.LHL_gldm_Idn                                         | 1,585845 | 0,179597 | 0,284145 | n.s. |
| wavelet.LLL_gldm_Idn                                         | 1,578514 | 0,181728 | 0,286764 | n.s. |
| log.sigma.4.0.mm.3D_gldm_GrayLevelNonUniformity              | 1,578627 | 0,181695 | 0,286764 | n.s. |
| wavelet.HLH_gldm_ClusterProminence                           | 1,572961 | 0,183359 | 0,288958 | n.s. |
| wavelet.LHH_gldm_Id                                          | 1,571662 | 0,183742 | 0,289184 | n.s. |
| log.sigma.1.0.mm.3D_glszm_SizeZoneNonUniformity              | 1,570532 | 0,184077 | 0,289332 | n.s. |
| wavelet.LHH_gldm_ClusterShade                                | 1,553797 | 0,184686 | 0,289911 | n.s. |
| log.sigma.2.0.mm.3D_gldm_ClusterShade                        | 1,56272  | 0,186402 | 0,292224 | n.s. |
| wavelet.LHL_firstorder_90Percentile                          | 1,557694 | 0,187912 | 0,293827 | n.s. |
| wavelet.HHH_glszm_SmallAreaLowGrayLevelEmphasis              | 1,558104 | 0,187789 | 0,293827 | n.s. |
| wavelet.LLH_glszm_SizeZoneNonUniformity                      | 1,551992 | 0,18964  | 0,296143 | n.s. |
| wavelet.LHH_firstorder_Skewness                              | 1,541139 | 0,192969 | 0,300951 | n.s. |
| wavelet.HHH_gldm_LargeDependenceHighGrayLevelEmphasis        | 1,539048 | 0,193616 | 0,301571 | n.s. |
| wavelet.LHH_gldm_SumSquares                                  | 1,536483 | 0,194413 | 0,302421 | n.s. |
| wavelet.LLL_gldm_DependenceVariance                          | 1,524116 | 0,198299 | 0,308068 | n.s. |
| wavelet.LHH_glszm_SizeZoneNonUniformityNormalized            | 1,518423 | 0,200112 | 0,310484 | n.s. |
| log.sigma.3.0.mm.3D_gldm_Autocorrelation                     | 1,511913 | 0,202204 | 0,313326 | n.s. |

|                                                               |          |          |          |      |
|---------------------------------------------------------------|----------|----------|----------|------|
| wavelet.HHH_gldm_LargeDependenceLowGrayLevelEmphasis          | 1,506218 | 0,204051 | 0,315375 | n.s. |
| log.sigma.3.0.mm.3D_gldm_SmallDependenceHighGrayLevelEmphasis | 1,506787 | 0,203866 | 0,315375 | n.s. |
| wavelet.LHL_glrlm_RunEntropy                                  | 1,503789 | 0,204843 | 0,316194 | n.s. |
| wavelet.LHH_glcmm_JointEnergy                                 | 1,501963 | 0,205441 | 0,316563 | n.s. |
| log.sigma.5.0.mm.3D_glcmm_Correlation                         | 1,501452 | 0,205608 | 0,316563 | n.s. |
| wavelet.HHH_glrlm_LongRunHighGrayLevelEmphasis                | 1,492228 | 0,208653 | 0,320841 | n.s. |
| wavelet.HHH_gldm_LowGrayLevelEmphasis                         | 1,488109 | 0,210026 | 0,32254  | n.s. |
| wavelet.HHL_gldm_SmallDependenceEmphasis                      | 1,484913 | 0,211097 | 0,323772 | n.s. |
| log.sigma.1.0.mm.3D_glszm_SmallAreaLowGrayLevelEmphasis       | 1,481624 | 0,212205 | 0,325056 | n.s. |
| wavelet.HLH_gldm_SmallDependenceHighGrayLevelEmphasis         | 1,477971 | 0,213441 | 0,326535 | n.s. |
| wavelet.HHH_glcmm_JointAverage                                | 1,476306 | 0,214007 | 0,326985 | n.s. |
| wavelet.HHH_gldm_HighGrayLevelEmphasis                        | 1,474501 | 0,214622 | 0,327094 | n.s. |
| log.sigma.4.0.mm.3D_gldm_DependenceVariance                   | 1,475182 | 0,214389 | 0,327094 | n.s. |
| wavelet.HHH_firstorder_Minimum                                | 1,471882 | 0,215516 | 0,327746 | n.s. |
| wavelet.HHH_glrlm_LongRunLowGrayLevelEmphasis                 | 1,470425 | 0,216016 | 0,327746 | n.s. |
| wavelet.HHH_glcmm_Autocorrelation                             | 1,470068 | 0,216138 | 0,327746 | n.s. |
| wavelet.HHH_glszm_LargeAreaEmphasis                           | 1,38583  | 0,215923 | 0,327746 | n.s. |
| log.sigma.3.0.mm.3D_gldm_LargeDependenceHighGrayLevelEmphasis | 1,462464 | 0,218763 | 0,331309 | n.s. |
| wavelet.HHL_firstorder_Maximum                                | 1,460322 | 0,219507 | 0,331602 | n.s. |
| log.sigma.4.0.mm.3D_firstorder_Maximum                        | 1,461012 | 0,219267 | 0,331602 | n.s. |
| wavelet.HHH_gldm_LargeDependenceEmphasis                      | 1,459064 | 0,219945 | 0,331848 | n.s. |
| wavelet.HHH_firstorder_Range                                  | 1,451758 | 0,222507 | 0,334507 | n.s. |
| wavelet.HHH_glrlm_HighGrayLevelRunEmphasis                    | 1,452538 | 0,222232 | 0,334507 | n.s. |
| log.sigma.5.0.mm.3D_glrlm_HighGrayLevelRunEmphasis            | 1,45166  | 0,222541 | 0,334507 | n.s. |
| wavelet.HHH_glrlm_LowGrayLevelRunEmphasis                     | 1,450249 | 0,22304  | 0,334837 | n.s. |
| wavelet.HHH_firstorder_Skewness                               | 1,429281 | 0,226342 | 0,339372 | n.s. |
| wavelet.HHL_firstorder_Range                                  | 1,437304 | 0,227655 | 0,340916 | n.s. |
| wavelet.HHH_gldm_DependenceEntropy                            | 1,435176 | 0,228422 | 0,341639 | n.s. |
| wavelet.HHH_glrlm_ShortRunHighGrayLevelEmphasis               | 1,424322 | 0,23237  | 0,347113 | n.s. |
| wavelet.HHH_glcmm_Idn                                         | 1,423189 | 0,232786 | 0,347303 | n.s. |
| wavelet.HHH_glrlm_ShortRunLowGrayLevelEmphasis                | 1,420418 | 0,233805 | 0,348392 | n.s. |
| wavelet.LHH_glrlm_ShortRunEmphasis                            | 1,418416 | 0,234544 | 0,348631 | n.s. |
| log.sigma.5.0.mm.3D_glszm_ZonePercentage                      | 1,418496 | 0,234515 | 0,348631 | n.s. |
| wavelet.HLH_firstorder_Range                                  | 1,411795 | 0,237003 | 0,351852 | n.s. |
| wavelet.LHH_firstorder_Minimum                                | 1,405883 | 0,239218 | 0,354703 | n.s. |
| log.sigma.4.0.mm.3D_gldm_DependenceNonUniformity              | 1,403844 | 0,239987 | 0,355405 | n.s. |
| wavelet.LLH_gldm_LargeDependenceHighGrayLevelEmphasis         | 1,399109 | 0,24178  | 0,35762  | n.s. |
| wavelet.LHH_glcmm_Imc1                                        | 1,397601 | 0,242353 | 0,358029 | n.s. |
| wavelet.HHL_glszm_LargeAreaLowGrayLevelEmphasis               | 1,395589 | 0,243121 | 0,358693 | n.s. |
| log.sigma.3.0.mm.3D_glszm_SmallAreaLowGrayLevelEmphasis       | 1,384189 | 0,243399 | 0,358693 | n.s. |
| wavelet.LLH_glrlm_LowGrayLevelRunEmphasis                     | 1,39325  | 0,244015 | 0,359161 | n.s. |
| wavelet.HHL_glrlm_GrayLevelNonUniformity                      | 1,389892 | 0,245304 | 0,360619 | n.s. |
| log.sigma.4.0.mm.3D_glszm_ZoneVariance                        | 1,315262 | 0,246155 | 0,361428 | n.s. |
| wavelet.LHL_glszm_GrayLevelNonUniformityNormalized            | 1,382415 | 0,248197 | 0,363982 | n.s. |
| wavelet.LHH_glcmm_SumEntropy                                  | 1,373633 | 0,251633 | 0,368573 | n.s. |
| wavelet.HLH_glcmm_Imc2                                        | 1,365389 | 0,254898 | 0,372845 | n.s. |

|                                                               |          |          |          |      |
|---------------------------------------------------------------|----------|----------|----------|------|
| wavelet.HLH_glszm_LargeAreaHighGrayLevelEmphasis              | 1,364706 | 0,25517  | 0,372845 | n.s. |
| wavelet.HLL_glcm_ClusterShade                                 | 1,360332 | 0,256919 | 0,374492 | n.s. |
| wavelet.HHH_glrlm_RunVariance                                 | 1,360816 | 0,256725 | 0,374492 | n.s. |
| wavelet.LHH_glcm_Imc2                                         | 1,355171 | 0,258996 | 0,377063 | n.s. |
| wavelet.HHL_gldm_DependenceNonUniformity                      | 1,353486 | 0,259678 | 0,377143 | n.s. |
| wavelet.LLH_gldm_LowGrayLevelEmphasis                         | 1,354216 | 0,259382 | 0,377143 | n.s. |
| wavelet.HHH_gldm_DependenceNonUniformityNormalized            | 1,350976 | 0,260695 | 0,37771  | n.s. |
| log.sigma.1.0.mm.3D_firstorder_Kurtosis                       | 1,351183 | 0,260612 | 0,37771  | n.s. |
| wavelet.HHL_glcm_Correlation                                  | 1,346734 | 0,262424 | 0,379757 | n.s. |
| wavelet.LHL_glszm_GrayLevelVariance                           | 1,337318 | 0,266297 | 0,384899 | n.s. |
| wavelet.HHH_glcm_Idmn                                         | 1,333126 | 0,268037 | 0,38695  | n.s. |
| wavelet.HHL_gldm_GrayLevelNonUniformity                       | 1,331454 | 0,268734 | 0,387491 | n.s. |
| wavelet.LLH_glrlm_ShortRunLowGrayLevelEmphasis                | 1,3287   | 0,269885 | 0,388657 | n.s. |
| wavelet.HHH_gldm_SmallDependenceHighGrayLevelEmphasis         | 1,318704 | 0,270188 | 0,388657 | n.s. |
| wavelet.LLH_glszm_ZoneEntropy                                 | 1,325221 | 0,271345 | 0,388928 | n.s. |
| wavelet.LHL_firstorder_InterquartileRange                     | 1,326249 | 0,270913 | 0,388928 | n.s. |
| log.sigma.5.0.mm.3D_glszm_LargeAreaHighGrayLevelEmphasis      | 1,261685 | 0,271319 | 0,388928 | n.s. |
| wavelet.LHH_glrlm_RunLengthNonUniformityNormalized            | 1,319239 | 0,273873 | 0,392085 | n.s. |
| wavelet.LLH_firstorder_90Percentile                           | 1,317813 | 0,274479 | 0,392485 | n.s. |
| wavelet.LHL_glszm_LargeAreaLowGrayLevelEmphasis               | 1,313228 | 0,276433 | 0,394811 | n.s. |
| wavelet.LHL_glrlm_RunVariance                                 | 1,310477 | 0,277612 | 0,396025 | n.s. |
| wavelet.LLL_firstorder_Minimum                                | 1,307165 | 0,279037 | 0,397587 | n.s. |
| wavelet.HHL_glrlm_RunLengthNonUniformity                      | 1,302116 | 0,281222 | 0,400226 | n.s. |
| wavelet.LHH_glrlm_RunPercentage                               | 1,291974 | 0,285655 | 0,406054 | n.s. |
| log.sigma.5.0.mm.3D_gldm_LargeDependenceLowGrayLevelEmphasis  | 1,290049 | 0,286503 | 0,40678  | n.s. |
| log.sigma.2.0.mm.3D_gldm_DependenceNonUniformityNormalized    | 1,287041 | 0,287833 | 0,408187 | n.s. |
| log.sigma.5.0.mm.3D_glcm_ClusterProminence                    | 1,281171 | 0,290443 | 0,411404 | n.s. |
| log.sigma.5.0.mm.3D_glrlm_LongRunHighGrayLevelEmphasis        | 1,279827 | 0,291044 | 0,41177  | n.s. |
| log.sigma.5.0.mm.3D_gldm_DependenceNonUniformity              | 1,275996 | 0,292761 | 0,413714 | n.s. |
| wavelet.HHH_gldm_GrayLevelNonUniformity                       | 1,275083 | 0,293172 | 0,413808 | n.s. |
| log.sigma.2.0.mm.3D_glszm_LargeAreaHighGrayLevelEmphasis      | 1,215459 | 0,29462  | 0,415366 | n.s. |
| wavelet.HLH_glszm_LargeAreaLowGrayLevelEmphasis               | 1,267999 | 0,296375 | 0,416674 | n.s. |
| wavelet.HHH_firstorder_Variance                               | 1,266772 | 0,296932 | 0,416674 | n.s. |
| log.sigma.4.0.mm.3D_gldm_LargeDependenceHighGrayLevelEmphasis | 1,2677   | 0,29651  | 0,416674 | n.s. |
| log.sigma.5.0.mm.3D_firstorder_Skewness                       | 1,266778 | 0,296929 | 0,416674 | n.s. |
| log.sigma.5.0.mm.3D_glszm_LowGrayLevelZoneEmphasis            | 1,262012 | 0,299105 | 0,419234 | n.s. |
| wavelet.LHH_glcm_ClusterTendency                              | 1,260037 | 0,30001  | 0,420014 | n.s. |
| wavelet.LLH_gldm_DependenceVariance                           | 1,252808 | 0,303344 | 0,423696 | n.s. |
| log.sigma.2.0.mm.3D_firstorder_Kurtosis                       | 1,252994 | 0,303258 | 0,423696 | n.s. |
| original_glszm_LargeAreaHighGrayLevelEmphasis                 | 1,1893   | 0,308471 | 0,430358 | n.s. |
| wavelet.LHL_gldm_GrayLevelNonUniformity                       | 1,238741 | 0,309921 | 0,431881 | n.s. |
| wavelet.HLH_gldm_DependenceNonUniformity                      | 1,229518 | 0,314299 | 0,437475 | n.s. |
| wavelet.HHL_glszm_LargeAreaHighGrayLevelEmphasis              | 1,228563 | 0,314755 | 0,437604 | n.s. |
| log.sigma.3.0.mm.3D_glszm_SmallAreaEmphasis                   | 1,224844 | 0,316537 | 0,439574 | n.s. |
| wavelet.HHL_glszm_ZonePercentage                              | 1,221229 | 0,318277 | 0,441314 | n.s. |
| wavelet.LHL_glrlm_GrayLevelNonUniformityNormalized            | 1,220719 | 0,318523 | 0,441314 | n.s. |

|                                                        |          |          |          |      |
|--------------------------------------------------------|----------|----------|----------|------|
| wavelet.LHL_glrlm_LongRunEmphasis                      | 1,219579 | 0,319074 | 0,441569 | n.s. |
| wavelet.HLH_glcmmc1                                    | 1,215774 | 0,320919 | 0,443612 | n.s. |
| log.sigma.3.0.mm.3D_glcmmc1                            | 1,213801 | 0,321878 | 0,444428 | n.s. |
| wavelet.HLL_glszm_LargeAreaHighGrayLevelEmphasis       | 1,209397 | 0,324029 | 0,446885 | n.s. |
| wavelet.LHH_glrlm_LongRunEmphasis                      | 1,207199 | 0,325108 | 0,447348 | n.s. |
| original_glcmmc1                                       | 1,207561 | 0,32493  | 0,447348 | n.s. |
| log.sigma.3.0.mm.3D_firstorder_Kurtosis                | 1,198533 | 0,329387 | 0,452719 | n.s. |
| wavelet.HHH_firstorder_10Percentile                    | 1,196036 | 0,330628 | 0,453907 | n.s. |
| wavelet.LHH_glszm_HighGrayLevelZoneEmphasis            | 1,193595 | 0,331846 | 0,45506  | n.s. |
| wavelet.LLH_glszm_GrayLevelVariance                    | 1,166147 | 0,345793 | 0,473543 | n.s. |
| wavelet.LHH_glrlm_GrayLevelVariance                    | 1,165532 | 0,346111 | 0,473543 | n.s. |
| wavelet.HHH_glrlm_RunLengthNonUniformity               | 1,163314 | 0,34726  | 0,474575 | n.s. |
| original_firstorder_Kurtosis                           | 1,157158 | 0,350464 | 0,478411 | n.s. |
| wavelet.LHH_glszm_GrayLevelNonUniformityNormalized     | 1,155791 | 0,351178 | 0,478843 | n.s. |
| wavelet.LHH_glcmmc1                                    | 1,153576 | 0,352339 | 0,479882 | n.s. |
| wavelet.LHL_firstorder_Uniformity                      | 1,14768  | 0,355443 | 0,483563 | n.s. |
| wavelet.HLL_glszm_SmallAreaEmphasis                    | 1,145226 | 0,356742 | 0,484782 | n.s. |
| wavelet.LLL_glszm_SizeZoneNonUniformityNormalized      | 1,14328  | 0,357774 | 0,485636 | n.s. |
| wavelet.HLH_glcmmc1                                    | 1,136433 | 0,358313 | 0,485821 | n.s. |
| wavelet.LHL_gldm_DependenceVariance                    | 1,138881 | 0,360116 | 0,487169 | n.s. |
| wavelet.LHH_gldm_LargeDependenceEmphasis               | 1,139042 | 0,36003  | 0,487169 | n.s. |
| wavelet.HHL_glrlm_LongRunEmphasis                      | 1,137928 | 0,360626 | 0,48731  | n.s. |
| original_gldm_SmallDependenceLowGrayLevelEmphasis      | 1,134714 | 0,362347 | 0,489087 | n.s. |
| wavelet.HHH_firstorder_Kurtosis                        | 1,126101 | 0,366991 | 0,494801 | n.s. |
| log.sigma.5.0.mm.3D_glszm_ZoneVariance                 | 1,124307 | 0,367965 | 0,495559 | n.s. |
| wavelet.HLL_glcmmc1                                    | 1,121459 | 0,369514 | 0,49709  | n.s. |
| wavelet.LHL_glszm_SizeZoneNonUniformity                | 1,120269 | 0,370163 | 0,497407 | n.s. |
| wavelet.LHL_gldm_DependenceEntropy                     | 1,118311 | 0,371233 | 0,497733 | n.s. |
| wavelet.LHH_gldm_SmallDependenceLowGrayLevelEmphasis   | 1,118604 | 0,371073 | 0,497733 | n.s. |
| wavelet.HHL_glrlm_ShortRunEmphasis                     | 1,114764 | 0,373177 | 0,499783 | n.s. |
| wavelet.HLH_firstorder_Skewness                        | 1,103972 | 0,379141 | 0,507207 | n.s. |
| wavelet.HLL_glcmmc1                                    | 1,101691 | 0,380411 | 0,508341 | n.s. |
| wavelet.HHL_glrlm_RunVariance                          | 1,097772 | 0,382601 | 0,5107   | n.s. |
| wavelet.HHL_glcmmc1                                    | 1,09692  | 0,383079 | 0,510771 | n.s. |
| wavelet.LHH_firstorder_Entropy                         | 1,092364 | 0,385639 | 0,513617 | n.s. |
| log.sigma.3.0.mm.3D_glrlm_LongRunHighGrayLevelEmphasis | 1,088319 | 0,387924 | 0,516089 | n.s. |
| wavelet.HHH_glrlm_RunEntropy                           | 1,085133 | 0,38973  | 0,517831 | n.s. |
| wavelet.LLL_glszm_SmallAreaEmphasis                    | 1,084365 | 0,390166 | 0,517831 | n.s. |
| log.sigma.2.0.mm.3D_glszm_SmallAreaEmphasis            | 1,083738 | 0,390523 | 0,517831 | n.s. |
| wavelet.LHH_firstorder_Range                           | 1,080817 | 0,392188 | 0,519465 | n.s. |
| wavelet.HHL_glrlm_RunLengthNonUniformityNormalized     | 1,079814 | 0,392761 | 0,519653 | n.s. |
| wavelet.LHH_gldm_GrayLevelVariance                     | 1,076422 | 0,394703 | 0,521649 | n.s. |
| wavelet.HHH_glcmmc1                                    | 1,069614 | 0,395891 | 0,522646 | n.s. |
| wavelet.LHH_glszm_LargeAreaLowGrayLevelEmphasis        | 1,073022 | 0,396657 | 0,523083 | n.s. |
| wavelet.HHH_glcmmc1                                    | 1,065107 | 0,39853  | 0,524978 | n.s. |
| wavelet.HLH_gldm_SmallDependenceLowGrayLevelEmphasis   | 1,068847 | 0,399066 | 0,52511  | n.s. |

|                                                          |          |          |          |      |
|----------------------------------------------------------|----------|----------|----------|------|
| wavelet.HHL_glcmldmn                                     | 1,062825 | 0,402561 | 0,525986 | n.s. |
| wavelet.LHH_firstorder_90Percentile                      | 1,066123 | 0,400644 | 0,525986 | n.s. |
| wavelet.HHH_firstorder_Maximum                           | 1,066518 | 0,400415 | 0,525986 | n.s. |
| log.sigma.1.0.mm.3D_glcml MaximumProbability             | 1,063906 | 0,401932 | 0,525986 | n.s. |
| log.sigma.4.0.mm.3D_glszm_GrayLevelNonUniformity         | 1,062432 | 0,40279  | 0,525986 | n.s. |
| log.sigma.4.0.mm.3D_glszm_LargeAreaHighGrayLevelEmphasis | 1,032894 | 0,401448 | 0,525986 | n.s. |
| log.sigma.5.0.mm.3D_glcmldmn                             | 1,06343  | 0,402209 | 0,525986 | n.s. |
| wavelet.HHH_glcml Correlation                            | 1,054805 | 0,40461  | 0,52779  | n.s. |
| wavelet.LHL_firstorder_Entropy                           | 1,055262 | 0,406983 | 0,530311 | n.s. |
| wavelet.HLH_glszm_GrayLevelNonUniformityNormalized       | 1,053475 | 0,408033 | 0,530671 | n.s. |
| wavelet.HHH_glcml DifferenceAverage                      | 1,048484 | 0,408374 | 0,530671 | n.s. |
| wavelet.HHH_gldm_DependenceNonUniformity                 | 1,052543 | 0,408582 | 0,530671 | n.s. |
| wavelet.LHH_glszm_LargeAreaEmphasis                      | 1,049511 | 0,41037  | 0,531995 | n.s. |
| log.sigma.4.0.mm.3D_firstorder_Kurtosis                  | 1,049317 | 0,410484 | 0,531995 | n.s. |
| wavelet.HHH_glrml LongRunEmphasis                        | 1,046336 | 0,412249 | 0,533707 | n.s. |
| wavelet.HHL_glrml_RunPercentage                          | 1,044457 | 0,413363 | 0,534575 | n.s. |
| wavelet.HHH_glrml_RunPercentage                          | 1,043231 | 0,414092 | 0,534943 | n.s. |
| wavelet.LHL_glrml_GrayLevelNonUniformity                 | 1,040679 | 0,415612 | 0,536331 | n.s. |
| wavelet.LHL_glszm_GrayLevelNonUniformity                 | 1,039452 | 0,416344 | 0,536701 | n.s. |
| wavelet.LHL_firstorder_RobustMeanAbsoluteDeviation       | 1,037267 | 0,41765  | 0,537808 | n.s. |
| log.sigma.5.0.mm.3D_glrml_RunEntropy                     | 1,030097 | 0,421957 | 0,542774 | n.s. |
| wavelet.LHL_gldm_LargeDependenceEmphasis                 | 1,028068 | 0,423182 | 0,543769 | n.s. |
| log.sigma.3.0.mm.3D_firstorder_Maximum                   | 1,025224 | 0,424903 | 0,545398 | n.s. |
| log.sigma.5.0.mm.3D_glrml_GrayLevelNonUniformity         | 1,022645 | 0,426468 | 0,546824 | n.s. |
| wavelet.HHH_glcml InverseVariance                        | 1,014782 | 0,428877 | 0,549327 | n.s. |
| wavelet.LHL_glcml_SumEntropy                             | 1,013368 | 0,432133 | 0,55291  | n.s. |
| wavelet.LHL_glszm_ZoneVariance                           | 1,00675  | 0,436207 | 0,55753  | n.s. |
| wavelet.LHL_glszm_LargeAreaEmphasis                      | 1,005148 | 0,437197 | 0,557826 | n.s. |
| wavelet.LHH_gldm_LargeDependenceHighGrayLevelEmphasis    | 1,004877 | 0,437365 | 0,557826 | n.s. |
| wavelet.LHL_glcml_MaximumProbability                     | 1,002088 | 0,439094 | 0,559438 | n.s. |
| wavelet.LLH_gldm_SmallDependenceLowGrayLevelEmphasis     | 1,000352 | 0,440172 | 0,559901 | n.s. |
| wavelet.LLL_glszm_LargeAreaHighGrayLevelEmphasis         | 1,000005 | 0,440387 | 0,559901 | n.s. |
| wavelet.HLH_glcml Correlation                            | 0,996466 | 0,442592 | 0,562111 | n.s. |
| wavelet.LLH_glcml_ClusterProminence                      | 0,995368 | 0,443278 | 0,562388 | n.s. |
| wavelet.HLH_glszm_SizeZoneNonUniformityNormalized        | 0,993982 | 0,444144 | 0,562894 | n.s. |
| wavelet.LHH_glrml_GrayLevelNonUniformityNormalized       | 0,991815 | 0,445501 | 0,56402  | n.s. |
| wavelet.LHH_glcml InverseVariance                        | 0,991    | 0,446012 | 0,564074 | n.s. |
| wavelet.HHL_glszm_GrayLevelVariance                      | 0,986767 | 0,448674 | 0,566845 | n.s. |
| log.sigma.4.0.mm.3D_glszm_SmallAreaLowGrayLevelEmphasis  | 0,983764 | 0,450568 | 0,568642 | n.s. |
| wavelet.HLH_firstorder_Kurtosis                          | 0,980095 | 0,452891 | 0,570975 | n.s. |
| wavelet.HHH_glszm_LargeAreaHighGrayLevelEmphasis         | 0,949733 | 0,457809 | 0,576571 | n.s. |
| wavelet.LHL_gldm_DependenceNonUniformityNormalized       | 0,968751 | 0,460125 | 0,578278 | n.s. |
| log.sigma.4.0.mm.3D_glcmldmn                             | 0,968956 | 0,459993 | 0,578278 | n.s. |
| wavelet.HHL_glszm_SizeZoneNonUniformity                  | 0,966297 | 0,4617   | 0,579048 | n.s. |
| wavelet.LHH_glszm_ZoneVariance                           | 0,966509 | 0,461563 | 0,579048 | n.s. |
| log.sigma.5.0.mm.3D_gldm_DependenceVariance              | 0,964422 | 0,462905 | 0,579957 | n.s. |

|                                                            |          |          |          |      |
|------------------------------------------------------------|----------|----------|----------|------|
| wavelet.HHL_gldm_DependenceVariance                        | 0,962665 | 0,464038 | 0,58077  | n.s. |
| wavelet.LHL_glszm_SmallAreaEmphasis                        | 0,959615 | 0,466007 | 0,582629 | n.s. |
| wavelet.HHL_firstorder_MeanAbsoluteDeviation               | 0,957846 | 0,467152 | 0,583455 | n.s. |
| log.sigma.3.0.mm.3D_glszm_GrayLevelNonUniformityNormalized | 0,955665 | 0,468566 | 0,584615 | n.s. |
| wavelet.HLH_glcm_JointAverage                              | 0,951953 | 0,470979 | 0,58641  | n.s. |
| wavelet.HLH_gldm_LowGrayLevelEmphasis                      | 0,952556 | 0,470586 | 0,58641  | n.s. |
| wavelet.HLH_glrlm_LowGrayLevelRunEmphasis                  | 0,943817 | 0,476297 | 0,592419 | n.s. |
| log.sigma.5.0.mm.3D_glrlm_LowGrayLevelRunEmphasis          | 0,942125 | 0,477408 | 0,593188 | n.s. |
| wavelet.HHL_glcm_Id                                        | 0,940041 | 0,478778 | 0,594277 | n.s. |
| wavelet.HHL_firstorder_Variance                            | 0,938194 | 0,479996 | 0,595175 | n.s. |
| wavelet.HLH_gldm_LargeDependenceLowGrayLevelEmphasis       | 0,936496 | 0,481116 | 0,595951 | n.s. |
| wavelet.LHL_firstorder_MeanAbsoluteDeviation               | 0,934927 | 0,482153 | 0,596621 | n.s. |
| wavelet.HLH_glrlm_LongRunLowGrayLevelEmphasis              | 0,933719 | 0,482952 | 0,596997 | n.s. |
| log.sigma.3.0.mm.3D_firstorder_Skewness                    | 0,932949 | 0,483463 | 0,597014 | n.s. |
| wavelet.HHH_glcm_MaximumProbability                        | 0,930319 | 0,485206 | 0,59733  | n.s. |
| wavelet.HHH_glcm_Contrast                                  | 0,928581 | 0,48455  | 0,59733  | n.s. |
| log.sigma.1.0.mm.3D_glszm_LargeAreaHighGrayLevelEmphasis   | 0,930825 | 0,48487  | 0,59733  | n.s. |
| wavelet.HHL_firstorder_Entropy                             | 0,926684 | 0,487624 | 0,599693 | n.s. |
| original_glszm_GrayLevelNonUniformity                      | 0,924675 | 0,488964 | 0,600727 | n.s. |
| wavelet.HLH_glrlm_ShortRunLowGrayLevelEmphasis             | 0,921831 | 0,490864 | 0,60217  | n.s. |
| log.sigma.5.0.mm.3D_gldm_HighGrayLevelEmphasis             | 0,921421 | 0,491139 | 0,60217  | n.s. |
| wavelet.HHL_glrlm_GrayLevelNonUniformityNormalized         | 0,918995 | 0,492764 | 0,602935 | n.s. |
| wavelet.LHL_glcm_JointEntropy                              | 0,919019 | 0,492747 | 0,602935 | n.s. |
| wavelet.HHL_glrlm_GrayLevelVariance                        | 0,917689 | 0,49364  | 0,603393 | n.s. |
| wavelet.HHL_glcm_Idm                                       | 0,914379 | 0,495865 | 0,605499 | n.s. |
| wavelet.HLL_glszm_SizeZoneNonUniformityNormalized          | 0,909434 | 0,499202 | 0,608339 | n.s. |
| wavelet.LHH_firstorder_Uniformity                          | 0,909725 | 0,499005 | 0,608339 | n.s. |
| wavelet.HLH_gldm_DependenceVariance                        | 0,90761  | 0,500435 | 0,609226 | n.s. |
| wavelet.HHH_glrlm_GrayLevelNonUniformityNormalized         | 0,902653 | 0,503799 | 0,612701 | n.s. |
| wavelet.HLH_glrlm_ShortRunHighGrayLevelEmphasis            | 0,900182 | 0,505481 | 0,613662 | n.s. |
| wavelet.HHH_glszm_SmallAreaHighGrayLevelEmphasis           | 0,899995 | 0,505608 | 0,613662 | n.s. |
| wavelet.HHL_firstorder_RobustMeanAbsoluteDeviation         | 0,896266 | 0,508153 | 0,613665 | n.s. |
| wavelet.HHL_glcm_DifferenceEntropy                         | 0,896087 | 0,508275 | 0,613665 | n.s. |
| wavelet.LHL_glrlm_RunPercentage                            | 0,897296 | 0,507449 | 0,613665 | n.s. |
| wavelet.LHH_firstorder_Variance                            | 0,896303 | 0,508128 | 0,613665 | n.s. |
| wavelet.LHH_glszm_LowGrayLevelZoneEmphasis                 | 0,894541 | 0,509333 | 0,613665 | n.s. |
| wavelet.HHH_glcm_ClusterTendency                           | 0,896048 | 0,508302 | 0,613665 | n.s. |
| wavelet.HHH_gldm_SmallDependenceLowGrayLevelEmphasis       | 0,894021 | 0,509689 | 0,613665 | n.s. |
| log.sigma.5.0.mm.3D_glszm_SizeZoneNonUniformity            | 0,895188 | 0,50889  | 0,613665 | n.s. |
| wavelet.HHH_glrlm_GrayLevelVariance                        | 0,891175 | 0,51164  | 0,615399 | n.s. |
| log.sigma.5.0.mm.3D_gldm_LowGrayLevelEmphasis              | 0,88628  | 0,515006 | 0,618829 | n.s. |
| wavelet.HHH_glcm_DifferenceEntropy                         | 0,884986 | 0,515898 | 0,619283 | n.s. |
| wavelet.LHH_glrlm_ShortRunLowGrayLevelEmphasis             | 0,879308 | 0,519823 | 0,623373 | n.s. |
| wavelet.HHL_glcm_JointEntropy                              | 0,874152 | 0,523402 | 0,624504 | n.s. |
| wavelet.HHL_glcm_DifferenceAverage                         | 0,874534 | 0,523136 | 0,624504 | n.s. |
| wavelet.HHL_glszm_ZoneEntropy                              | 0,872423 | 0,524605 | 0,624504 | n.s. |

|                                                            |          |          |          |      |
|------------------------------------------------------------|----------|----------|----------|------|
| wavelet.LLH_glszm_SmallAreaEmphasis                        | 0,871978 | 0,524915 | 0,624504 | n.s. |
| wavelet.LHL_glszm_SizeZoneNonUniformityNormalized          | 0,873244 | 0,524034 | 0,624504 | n.s. |
| log.sigma.3.0.mm.3D_glszm_SizeZoneNonUniformity            | 0,875116 | 0,522732 | 0,624504 | n.s. |
| log.sigma.5.0.mm.3D_glszm_GrayLevelNonUniformity           | 0,873691 | 0,523722 | 0,624504 | n.s. |
| log.sigma.5.0.mm.3D_glszm_SizeZoneNonUniformityNormalized  | 0,872231 | 0,524739 | 0,624504 | n.s. |
| log.sigma.1.0.mm.3D_glszm_SizeZoneNonUniformityNormalized  | 0,868697 | 0,527204 | 0,626607 | n.s. |
| wavelet.LHL_glcm_Correlation                               | 0,866674 | 0,528618 | 0,627669 | n.s. |
| wavelet.HHH_glcm_DifferenceVariance                        | 0,864522 | 0,530125 | 0,628385 | n.s. |
| log.sigma.2.0.mm.3D_glszm_GrayLevelNonUniformity           | 0,864321 | 0,530265 | 0,628385 | n.s. |
| wavelet.LLH_firstorder_Kurtosis                            | 0,863175 | 0,531069 | 0,628718 | n.s. |
| wavelet.HHH_firstorder_Entropy                             | 0,861786 | 0,532043 | 0,629241 | n.s. |
| wavelet.HHH_glszm_ZoneVariance                             | 0,861056 | 0,532556 | 0,629241 | n.s. |
| wavelet.HHH_glcm_ClusterProminence                         | 0,859906 | 0,533364 | 0,629579 | n.s. |
| wavelet.HHL_gldm_LargeDependenceEmphasis                   | 0,858617 | 0,534271 | 0,630031 | n.s. |
| log.sigma.5.0.mm.3D_glcm_JointAverage                      | 0,855303 | 0,536606 | 0,632166 | n.s. |
| wavelet.HLH_glcm_InverseVariance                           | 0,852057 | 0,538898 | 0,634246 | n.s. |
| wavelet.HHH_glcm_SumSquares                                | 0,849535 | 0,540682 | 0,635724 | n.s. |
| wavelet.HHH_glcm_JointEntropy                              | 0,848495 | 0,541419 | 0,63597  | n.s. |
| wavelet.HHL_glcm_SumEntropy                                | 0,84364  | 0,544867 | 0,638512 | n.s. |
| wavelet.HHL_glcm_Imc1                                      | 0,844453 | 0,544289 | 0,638512 | n.s. |
| wavelet.HHL_gldm_SmallDependenceHighGrayLevelEmphasis      | 0,843207 | 0,545175 | 0,638512 | n.s. |
| wavelet.HHH_glcm_SumEntropy                                | 0,842275 | 0,545838 | 0,638668 | n.s. |
| wavelet.LHH_glrIm_ShortRunHighGrayLevelEmphasis            | 0,840647 | 0,546998 | 0,639403 | n.s. |
| log.sigma.5.0.mm.3D_glszm_GrayLevelNonUniformityNormalized | 0,839076 | 0,548118 | 0,640091 | n.s. |
| wavelet.LHH_glrIm_RunVariance                              | 0,834481 | 0,551402 | 0,643302 | n.s. |
| wavelet.HHL_glcm_DifferenceVariance                        | 0,830396 | 0,55433  | 0,644221 | n.s. |
| wavelet.HHL_gldm_GrayLevelVariance                         | 0,831097 | 0,553827 | 0,644221 | n.s. |
| wavelet.HHL_gldm_DependenceEntropy                         | 0,831412 | 0,553601 | 0,644221 | n.s. |
| wavelet.LHH_gldm_HighGrayLevelEmphasis                     | 0,830819 | 0,554027 | 0,644221 | n.s. |
| wavelet.HHL_glcm_JointEnergy                               | 0,826617 | 0,557046 | 0,646753 | n.s. |
| wavelet.LHL_glrIm_ShortRunEmphasis                         | 0,825533 | 0,557826 | 0,647035 | n.s. |
| wavelet.LHH_glcm_Autocorrelation                           | 0,823467 | 0,559315 | 0,648138 | n.s. |
| wavelet.LLH_glcm_ClusterShade                              | 0,820975 | 0,561113 | 0,648249 | n.s. |
| wavelet.LHL_firstorder_Kurtosis                            | 0,821596 | 0,560664 | 0,648249 | n.s. |
| wavelet.HLH_glrIm_HighGrayLevelRunEmphasis                 | 0,820349 | 0,561565 | 0,648249 | n.s. |
| wavelet.HHH_glcm_Imc2                                      | 0,822161 | 0,560256 | 0,648249 | n.s. |
| log.sigma.1.0.mm.3D_glszm_GrayLevelNonUniformity           | 0,818173 | 0,563138 | 0,649443 | n.s. |
| wavelet.HHL_firstorder_Uniformity                          | 0,81652  | 0,564335 | 0,649578 | n.s. |
| wavelet.HHH_gldm_GrayLevelVariance                         | 0,817263 | 0,563796 | 0,649578 | n.s. |
| wavelet.HHL_glcm_Contrast                                  | 0,813896 | 0,566236 | 0,650524 | n.s. |
| wavelet.LHH_gldm_LowGrayLevelEmphasis                      | 0,81425  | 0,565979 | 0,650524 | n.s. |
| wavelet.LHH_glrIm_HighGrayLevelRunEmphasis                 | 0,811599 | 0,567904 | 0,651817 | n.s. |
| wavelet.HLH_glcm_Autocorrelation                           | 0,809187 | 0,569657 | 0,653207 | n.s. |
| wavelet.LHH_glrIm_LowGrayLevelRunEmphasis                  | 0,808196 | 0,570378 | 0,653411 | n.s. |
| wavelet.HLH_gldm_HighGrayLevelEmphasis                     | 0,80617  | 0,571854 | 0,653858 | n.s. |
| wavelet.LLL_glcm_ClusterShade                              | 0,806859 | 0,571352 | 0,653858 | n.s. |

|                                                               |          |          |          |      |
|---------------------------------------------------------------|----------|----------|----------|------|
| wavelet.HHL_glrlm_RunEntropy                                  | 0,801562 | 0,575218 | 0,65708  | n.s. |
| wavelet.HHL_firstorder_Minimum                                | 0,799691 | 0,576586 | 0,658018 | n.s. |
| wavelet.LHH_glcmm_JointAverage                                | 0,798795 | 0,577242 | 0,658143 | n.s. |
| wavelet.LHH_gldm_LargeDependenceLowGrayLevelEmphasis          | 0,797354 | 0,578296 | 0,658722 | n.s. |
| wavelet.LHL_glcmm_ClusterTendency                             | 0,794996 | 0,580025 | 0,659591 | n.s. |
| wavelet.HHH_glszm_GrayLevelVariance                           | 0,79482  | 0,580155 | 0,659591 | n.s. |
| wavelet.LHL_glrlm_RunLengthNonUniformityNormalized            | 0,792391 | 0,581938 | 0,660994 | n.s. |
| wavelet.LHH_glrlm_LongRunHighGrayLevelEmphasis                | 0,789864 | 0,583796 | 0,661739 | n.s. |
| log.sigma.1.0.mm.3D_firstorder_90Percentile                   | 0,790433 | 0,583378 | 0,661739 | n.s. |
| log.sigma.3.0.mm.3D_glszm_GrayLevelVariance                   | 0,789257 | 0,584243 | 0,661739 | n.s. |
| wavelet.HHL_glcmm_lmc2                                        | 0,786528 | 0,586253 | 0,662033 | n.s. |
| wavelet.LHL_gldm_GrayLevelVariance                            | 0,787069 | 0,585855 | 0,662033 | n.s. |
| wavelet.LHL_gldm_SmallDependenceEmphasis                      | 0,787432 | 0,585587 | 0,662033 | n.s. |
| log.sigma.5.0.mm.3D_glrlm_ShortRunLowGrayLevelEmphasis        | 0,78592  | 0,586702 | 0,662033 | n.s. |
| wavelet.LHL_glszm_ZoneEntropy                                 | 0,784726 | 0,587582 | 0,662405 | n.s. |
| wavelet.HHH_firstorder_Uniformity                             | 0,782902 | 0,588929 | 0,663302 | n.s. |
| wavelet.HHL_glcmm_SumSquares                                  | 0,780562 | 0,590659 | 0,663962 | n.s. |
| wavelet.LLH_glcmm_Correlation                                 | 0,779872 | 0,591169 | 0,663962 | n.s. |
| wavelet.HLH_glszm_LowGrayLevelZoneEmphasis                    | 0,779928 | 0,591128 | 0,663962 | n.s. |
| wavelet.LHH_firstorder_Maximum                                | 0,779007 | 0,591809 | 0,664061 | n.s. |
| wavelet.LHL_glrlm_GrayLevelVariance                           | 0,776626 | 0,593572 | 0,664377 | n.s. |
| wavelet.LHL_glcmm_JointEnergy                                 | 0,777674 | 0,592796 | 0,664377 | n.s. |
| wavelet.HHH_glcmm_lmc1                                        | 0,7762   | 0,593888 | 0,664377 | n.s. |
| log.sigma.3.0.mm.3D_glszm_SmallAreaHighGrayLevelEmphasis      | 0,775648 | 0,594298 | 0,664377 | n.s. |
| wavelet.LHL_glcmm_SumSquares                                  | 0,770574 | 0,598065 | 0,666732 | n.s. |
| log.sigma.3.0.mm.3D_glcmm_Correlation                         | 0,770931 | 0,597799 | 0,666732 | n.s. |
| log.sigma.5.0.mm.3D_firstorder_Kurtosis                       | 0,771081 | 0,597688 | 0,666732 | n.s. |
| log.sigma.5.0.mm.3D_gldm_LargeDependenceHighGrayLevelEmphasis | 0,769554 | 0,598823 | 0,66696  | n.s. |
| wavelet.HHL_firstorder_10Percentile                           | 0,76314  | 0,603602 | 0,671661 | n.s. |
| wavelet.LLH_firstorder_Maximum                                | 0,758159 | 0,607323 | 0,675177 | n.s. |
| wavelet.HHL_glcmm_ClusterTendency                             | 0,756733 | 0,60839  | 0,675739 | n.s. |
| wavelet.LHH_firstorder_10Percentile                           | 0,755114 | 0,609602 | 0,676462 | n.s. |
| wavelet.HHL_gldm_LargeDependenceLowGrayLevelEmphasis          | 0,750306 | 0,613207 | 0,67921  | n.s. |
| wavelet.HLH_firstorder_Median                                 | 0,750739 | 0,612882 | 0,67921  | n.s. |
| wavelet.HLH_glszm_SizeZoneNonUniformity                       | 0,742307 | 0,619222 | 0,685242 | n.s. |
| wavelet.HHL_glcmm_ClusterProminence                           | 0,739826 | 0,621092 | 0,68668  | n.s. |
| wavelet.HHL_firstorder_90Percentile                           | 0,736883 | 0,623312 | 0,687389 | n.s. |
| wavelet.LLH_glszm_SizeZoneNonUniformityNormalized             | 0,737188 | 0,623082 | 0,687389 | n.s. |
| wavelet.LHL_firstorder_10Percentile                           | 0,736706 | 0,623446 | 0,687389 | n.s. |
| wavelet.LHL_glcmm_DifferenceVariance                          | 0,734506 | 0,625108 | 0,687961 | n.s. |
| wavelet.LHH_glrlm_LongRunLowGrayLevelEmphasis                 | 0,735083 | 0,624672 | 0,687961 | n.s. |
| wavelet.LHL_firstorder_Variance                               | 0,726346 | 0,631283 | 0,694123 | n.s. |
| wavelet.LHL_glcmm_ClusterProminence                           | 0,721532 | 0,634936 | 0,696232 | n.s. |
| wavelet.LHH_firstorder_Kurtosis                               | 0,722133 | 0,634479 | 0,696232 | n.s. |
| wavelet.LLL_glszm_GrayLevelNonUniformity                      | 0,72184  | 0,634702 | 0,696232 | n.s. |
| wavelet.HLH_glszm_SmallAreaEmphasis                           | 0,717355 | 0,638109 | 0,699075 | n.s. |



|                                                              |          |          |          |      |
|--------------------------------------------------------------|----------|----------|----------|------|
| wavelet.LLH_glcmm_Idmn                                       | 0,714093 | 0,640592 | 0,70052  | n.s. |
| wavelet.LHH_glrmm_RunEntropy                                 | 0,714782 | 0,640067 | 0,70052  | n.s. |
| wavelet.LHH_glcmm_Idn                                        | 0,707127 | 0,6459   | 0,705684 | n.s. |
| wavelet.LLH_glszm_LargeAreaHighGrayLevelEmphasis             | 0,698642 | 0,652381 | 0,712119 | n.s. |
| log.sigma.5.0.mm.3D_glcmm_Autocorrelation                    | 0,697366 | 0,653358 | 0,712539 | n.s. |
| original_glszm_SmallAreaEmphasis                             | 0,696142 | 0,654294 | 0,712914 | n.s. |
| wavelet.LHL_firstorder_Range                                 | 0,695219 | 0,655001 | 0,713039 | n.s. |
| wavelet.HLH_glrmm_LongRunHighGrayLevelEmphasis               | 0,688356 | 0,660258 | 0,718113 | n.s. |
| wavelet.HHH_glcmm_JointEnergy                                | 0,685868 | 0,662167 | 0,719539 | n.s. |
| wavelet.LHL_glcmm_Contrast                                   | 0,681904 | 0,66521  | 0,722193 | n.s. |
| wavelet.HLH_gldm_LargeDependenceHighGrayLevelEmphasis        | 0,674986 | 0,670525 | 0,727309 | n.s. |
| original_gldm_DependenceVariance                             | 0,670278 | 0,674147 | 0,730579 | n.s. |
| wavelet.LHH_gldm_DependenceNonUniformityNormalized           | 0,668208 | 0,67574  | 0,730989 | n.s. |
| wavelet.HHH_glrmm_RunLengthNonUniformityNormalized           | 0,668829 | 0,675262 | 0,730989 | n.s. |
| wavelet.LLH_firstorder_Skewness                              | 0,6613   | 0,681061 | 0,734764 | n.s. |
| wavelet.LHL_glcmm_Id                                         | 0,661875 | 0,680618 | 0,734764 | n.s. |
| log.sigma.2.0.mm.3D_glcmm_Idmn                               | 0,661991 | 0,680528 | 0,734764 | n.s. |
| wavelet.LHL_glcmm_DifferenceAverage                          | 0,660449 | 0,681716 | 0,734813 | n.s. |
| log.sigma.2.0.mm.3D_gldm_DependenceNonUniformity             | 0,649585 | 0,690094 | 0,743178 | n.s. |
| wavelet.LHH_gldm_DependenceVariance                          | 0,645838 | 0,692985 | 0,745625 | n.s. |
| log.sigma.5.0.mm.3D_gldm_SmallDependenceLowGrayLevelEmphasis | 0,644816 | 0,693774 | 0,745807 | n.s. |
| wavelet.LHH_glcmm_Idmn                                       | 0,640155 | 0,697371 | 0,749005 | n.s. |
| wavelet.LHL_glcmm_DifferenceEntropy                          | 0,63874  | 0,698464 | 0,749479 | n.s. |
| wavelet.HHH_firstorder_MeanAbsoluteDeviation                 | 0,637971 | 0,699057 | 0,749479 | n.s. |
| log.sigma.1.0.mm.3D_gldm_DependenceVariance                  | 0,633019 | 0,70288  | 0,752907 | n.s. |
| wavelet.HHH_firstorder_90Percentile                          | 0,627325 | 0,707276 | 0,756943 | n.s. |
| log.sigma.3.0.mm.3D_glcmm_Idmn                               | 0,620592 | 0,712473 | 0,761828 | n.s. |
| log.sigma.2.0.mm.3D_glcmm_lmc1                               | 0,615326 | 0,716538 | 0,765494 | n.s. |
| wavelet.HHH_glszm_HighGrayLevelZoneEmphasis                  | 0,613467 | 0,717972 | 0,766345 | n.s. |
| wavelet.LHL_glcmm_Idm                                        | 0,610747 | 0,72007  | 0,767905 | n.s. |
| wavelet.LHH_glrmm_GrayLevelNonUniformity                     | 0,608365 | 0,721907 | 0,769183 | n.s. |
| wavelet.LLL_glszm_SmallAreaLowGrayLevelEmphasis              | 0,596457 | 0,731082 | 0,778269 | n.s. |
| wavelet.HHL_firstorder_InterquartileRange                    | 0,593948 | 0,733013 | 0,778947 | n.s. |
| wavelet.HLH_firstorder_Minimum                               | 0,594021 | 0,732956 | 0,778947 | n.s. |
| wavelet.LHH_firstorder_MeanAbsoluteDeviation                 | 0,59096  | 0,735311 | 0,780701 | n.s. |
| wavelet.HLH_gldm_DependenceNonUniformityNormalized           | 0,589677 | 0,736298 | 0,78106  | n.s. |
| wavelet.LHH_gldm_DependenceNonUniformity                     | 0,583726 | 0,740871 | 0,785218 | n.s. |
| log.sigma.3.0.mm.3D_glszm_GrayLevelNonUniformity             | 0,581807 | 0,742344 | 0,786088 | n.s. |
| wavelet.HLH_glszm_HighGrayLevelZoneEmphasis                  | 0,5707   | 0,750855 | 0,794402 | n.s. |
| wavelet.HHL_glrmm_ShortRunHighGrayLevelEmphasis              | 0,566728 | 0,753892 | 0,796915 | n.s. |
| wavelet.HHL_firstorder_Energy                                | 0,568385 | 0,755862 | 0,797596 | n.s. |
| wavelet.HHL_firstorder_TotalEnergy                           | 0,568385 | 0,755862 | 0,797596 | n.s. |
| original_glszm_SizeZoneNonUniformityNormalized               | 0,550348 | 0,766371 | 0,807978 | n.s. |
| wavelet.LHH_glcmm_Correlation                                | 0,54802  | 0,768139 | 0,809133 | n.s. |
| wavelet.HHL_gldm_HighGrayLevelEmphasis                       | 0,546777 | 0,769081 | 0,809418 | n.s. |
| wavelet.HHL_firstorder_Mean                                  | 0,537737 | 0,775921 | 0,815903 | n.s. |

|                                                          |          |          |          |      |
|----------------------------------------------------------|----------|----------|----------|------|
| wavelet.HLH_glszm_SmallAreaHighGrayLevelEmphasis         | 0,536691 | 0,776711 | 0,816021 | n.s. |
| wavelet.HHL_glrlm_HighGrayLevelRunEmphasis               | 0,533156 | 0,779375 | 0,817394 | n.s. |
| wavelet.HHL_glcmm_Autocorrelation                        | 0,533953 | 0,778775 | 0,817394 | n.s. |
| wavelet.LHH_glszm_ZoneEntropy                            | 0,531264 | 0,780799 | 0,818174 | n.s. |
| wavelet.HHL_glcmm_JointAverage                           | 0,528363 | 0,78298  | 0,819746 | n.s. |
| log.sigma.2.0.mm.3D_glszm_SmallAreaLowGrayLevelEmphasis  | 0,527828 | 0,783933 | 0,82003  | n.s. |
| wavelet.HHH_glrlm_ShortRunEmphasis                       | 0,525268 | 0,785303 | 0,82075  | n.s. |
| wavelet.HHL_firstorder_RootMeanSquared                   | 0,51849  | 0,790375 | 0,82462  | n.s. |
| wavelet.HHL_gldm_DependenceNonUniformityNormalized       | 0,518665 | 0,790245 | 0,82462  | n.s. |
| wavelet.LHL_glcmm_lmc1                                   | 0,516148 | 0,792122 | 0,825727 | n.s. |
| wavelet.HLH_glcmm_lmdn                                   | 0,510939 | 0,795999 | 0,829051 | n.s. |
| log.sigma.4.0.mm.3D_glszm_SmallAreaHighGrayLevelEmphasis | 0,504287 | 0,80093  | 0,833466 | n.s. |
| wavelet.HHH_glszm_LowGrayLevelZoneEmphasis               | 0,4962   | 0,806891 | 0,838944 | n.s. |
| wavelet.HHL_glcmm_MaximumProbability                     | 0,493656 | 0,808759 | 0,840161 | n.s. |
| wavelet.HHL_glszm_SmallAreaEmphasis                      | 0,482198 | 0,817121 | 0,848115 | n.s. |
| wavelet.LHL_firstorder_Maximum                           | 0,475078 | 0,822275 | 0,852729 | n.s. |
| wavelet.HHL_glrlm_LongRunLowGrayLevelEmphasis            | 0,472548 | 0,824098 | 0,85315  | n.s. |
| wavelet.HHH_glrlm_GrayLevelNonUniformity                 | 0,473492 | 0,823418 | 0,85315  | n.s. |
| wavelet.LHH_firstorder_RobustMeanAbsoluteDeviation       | 0,468671 | 0,826882 | 0,855297 | n.s. |
| wavelet.HHL_glrlm_LongRunHighGrayLevelEmphasis           | 0,465648 | 0,829045 | 0,856063 | n.s. |
| wavelet.HLH_glcmm_lmdn                                   | 0,466494 | 0,82844  | 0,856063 | n.s. |
| wavelet.HHL_gldm_LargeDependenceHighGrayLevelEmphasis    | 0,464581 | 0,829807 | 0,856116 | n.s. |
| wavelet.HHH_firstorder_InterquartileRange                | 0,46069  | 0,832578 | 0,857051 | n.s. |
| log.sigma.3.0.mm.3D_glcmm_lmc1                           | 0,46031  | 0,832848 | 0,857051 | n.s. |
| log.sigma.5.0.mm.3D_firstorder_Maximum                   | 0,462129 | 0,831555 | 0,857051 | n.s. |
| wavelet.LHL_glcmm_InverseVariance                        | 0,454778 | 0,836766 | 0,860347 | n.s. |
| wavelet.HHL_firstorder_Kurtosis                          | 0,449792 | 0,840986 | 0,863823 | n.s. |
| wavelet.LLH_glcmm_lmdn                                   | 0,447931 | 0,841582 | 0,863823 | n.s. |
| log.sigma.4.0.mm.3D_firstorder_Skewness                  | 0,432414 | 0,852344 | 0,874125 | n.s. |
| wavelet.LHH_gldm_DependenceEntropy                       | 0,429182 | 0,854558 | 0,875649 | n.s. |
| log.sigma.4.0.mm.3D_glrlm_LongRunHighGrayLevelEmphasis   | 0,425076 | 0,857357 | 0,87777  | n.s. |
| wavelet.HLH_firstorder_Energy                            | 0,423984 | 0,863522 | 0,882581 | n.s. |
| wavelet.HLH_firstorder_TotalEnergy                       | 0,423984 | 0,863522 | 0,882581 | n.s. |
| wavelet.LHL_glszm_ZonePercentage                         | 0,400726 | 0,873601 | 0,892126 | n.s. |
| wavelet.LLL_gldm_SmallDependenceLowGrayLevelEmphasis     | 0,394205 | 0,877842 | 0,895697 | n.s. |
| wavelet.HHH_glszm_GrayLevelNonUniformityNormalized       | 0,379385 | 0,887296 | 0,904576 | n.s. |
| wavelet.LHH_firstorder_InterquartileRange                | 0,361733 | 0,898196 | 0,914914 | n.s. |
| wavelet.LHL_glcmm_lmc2                                   | 0,344644 | 0,90835  | 0,924474 | n.s. |
| wavelet.HHL_glszm_SmallAreaLowGrayLevelEmphasis          | 0,333417 | 0,914791 | 0,930244 | n.s. |
| wavelet.HHL_firstorder_Median                            | 0,31831  | 0,923156 | 0,937817 | n.s. |
| wavelet.HHL_glszm_SizeZoneNonUniformityNormalized        | 0,317125 | 0,923797 | 0,937817 | n.s. |
| wavelet.HLH_firstorder_RootMeanSquared                   | 0,310642 | 0,927263 | 0,940543 | n.s. |
| wavelet.HHL_glszm_SmallAreaHighGrayLevelEmphasis         | 0,294369 | 0,935655 | 0,948256 | n.s. |
| wavelet.LHH_gldm_GrayLevelNonUniformity                  | 0,289035 | 0,938306 | 0,950144 | n.s. |
| log.sigma.4.0.mm.3D_glszm_SmallAreaEmphasis              | 0,28147  | 0,941925 | 0,953006 | n.s. |
| wavelet.HLH_firstorder_Mean                              | 0,247746 | 0,957079 | 0,967525 | n.s. |

|                                                      |          |          |          |      |
|------------------------------------------------------|----------|----------|----------|------|
| wavelet.LHH_glszm_LargeAreaHighGrayLevelEmphasis     | 0,235552 | 0,961999 | 0,971683 | n.s. |
| wavelet.HHL_glszm_LowGrayLevelZoneEmphasis           | 0,225054 | 0,965995 | 0,972931 | n.s. |
| wavelet.HHL_gldm_LowGrayLevelEmphasis                | 0,229098 | 0,964482 | 0,972931 | n.s. |
| wavelet.HHH_firstorder_RobustMeanAbsoluteDeviation   | 0,223777 | 0,966466 | 0,972931 | n.s. |
| log.sigma.4.0.mm.3D_glcm_Correlation                 | 0,224537 | 0,966187 | 0,972931 | n.s. |
| wavelet.HHL_glszm_HighGrayLevelZoneEmphasis          | 0,221352 | 0,967352 | 0,973009 | n.s. |
| wavelet.LHH_glszm_SmallAreaLowGrayLevelEmphasis      | 0,214723 | 0,96971  | 0,974566 | n.s. |
| wavelet.HHL_gldm_SmallDependenceLowGrayLevelEmphasis | 0,210967 | 0,971006 | 0,975055 | n.s. |
| wavelet.LHH_glrlm_RunLengthNonUniformity             | 0,195775 | 0,975945 | 0,979199 | n.s. |
| wavelet.HHL_glrlm_LowGrayLevelRunEmphasis            | 0,184493 | 0,979299 | 0,981745 | n.s. |
| wavelet.HHL_glrlm_ShortRunLowGrayLevelEmphasis       | 0,118206 | 0,993572 | 0,995226 | n.s. |
| wavelet.LLH_glszm_GrayLevelNonUniformity             | 0,099807 | 0,995946 | 0,996774 | n.s. |
| wavelet.HHL_glcm_InverseVariance                     | 0,051087 | 0,999396 | 0,999396 | n.s. |
