# Supplementary material for: Contrast Agent Dynamics Determine Radiomics Profiles in Oncologic Imaging
Source: MDPI journal article supplement (doi:10.3390/cancers16081519), 2024-04-16
Supplement: s1 [file s1]

**Table S5: Linear mixed model p values and cluster membership of all MRI radiomics features for NSCLC tumors**

| Feature                                            | F value | p value  | FDR      | Cluster |
|----------------------------------------------------|---------|----------|----------|---------|
| log-sigma-2-0-mm-3D_glcml_InverseVariance          | 64,7362 | 4,1E-45  | 4,59E-42 | 3       |
| wavelet-LHL_gldm_SmallDependenceEmphasis           | 60,4905 | 3,79E-43 | 2,12E-40 | 1       |
| wavelet-HHL_glrIm_RunEntropy                       | 59,5331 | 1,2E-42  | 4,48E-40 | 1       |
| wavelet-LHL_glszm_ZonePercentage                   | 58,2808 | 4,31E-42 | 1,21E-39 | 1       |
| wavelet-HHL_glszm_ZonePercentage                   | 57,5298 | 1,01E-41 | 2,25E-39 | 1       |
| log-sigma-2-0-mm-3D_glszm_ZonePercentage           | 56,5264 | 3,18E-41 | 4E-39    | 1       |
| log-sigma-2-0-mm-3D_glcml_Id                       | 56,7525 | 2,4E-41  | 4E-39    | 3       |
| log-sigma-2-0-mm-3D_glcml_DifferenceEntropy        | 56,4929 | 3,22E-41 | 4E-39    | 1       |
| original_glszm_ZonePercentage                      | 56,5546 | 3,05E-41 | 4E-39    | 1       |
| wavelet-HHL_firstorder_Entropy                     | 56,1841 | 4,88E-41 | 5,46E-39 | 1       |
| wavelet-HHL_glcml_InverseVariance                  | 55,6432 | 8,83E-41 | 8,97E-39 | 3       |
| log-sigma-2-0-mm-3D_firstorder_Entropy             | 55,1849 | 1,42E-40 | 1,26E-38 | 1       |
| log-sigma-2-0-mm-3D_glcml_Idm                      | 55,1681 | 1,47E-40 | 1,26E-38 | 3       |
| wavelet-HHL_glcml_DifferenceEntropy                | 55,158  | 1,59E-40 | 1,27E-38 | 1       |
| wavelet-HLH_glcml_Idm                              | 53,9813 | 6,07E-40 | 4,52E-38 | 3       |
| wavelet-HLH_glcml_Id                               | 53,8051 | 7,45E-40 | 5,2E-38  | 3       |
| wavelet-HLL_glszm_ZonePercentage                   | 53,6838 | 8,34E-40 | 5,49E-38 | 1       |
| wavelet-HLH_firstorder_Entropy                     | 52,7478 | 2,48E-39 | 1,5E-37  | 1       |
| wavelet-HHL_firstorder_10Percentile                | 52,7332 | 2,56E-39 | 1,5E-37  | 3       |
| wavelet-HHL_glcml_SumEntropy                       | 52,7222 | 2,74E-39 | 1,53E-37 | 1       |
| log-sigma-2-0-mm-3D_gldm_SmallDependenceEmphasis   | 52,3147 | 4,2E-39  | 2,24E-37 | 1       |
| wavelet-LHH_glcml_Idm                              | 51,761  | 8,02E-39 | 4,08E-37 | 3       |
| wavelet-HLH_glcml_SumEntropy                       | 51,6075 | 9,51E-39 | 4,62E-37 | 1       |
| wavelet-HLH_glrIm_RunLengthNonUniformityNormalized | 51,6115 | 1,04E-38 | 4,82E-37 | 1       |
| log-sigma-2-0-mm-3D_glrIm_RunEntropy               | 51,522  | 1,12E-38 | 4,84E-37 | 1       |
| original_glcml_DifferenceEntropy                   | 51,4432 | 1,2E-38  | 4,84E-37 | 1       |
| wavelet-LHL_glrIm_RunEntropy                       | 51,5281 | 1,2E-38  | 4,84E-37 | 1       |
| wavelet-LHH_glcml_Id                               | 51,4161 | 1,21E-38 | 4,84E-37 | 3       |
| log-sigma-3-0-mm-3D_glcml_InverseVariance          | 51,2175 | 1,56E-38 | 6E-37    | 3       |
| wavelet-HLH_glcml_JointEntropy                     | 51,1512 | 1,64E-38 | 6,13E-37 | 1       |
| wavelet-HLL_gldm_SmallDependenceEmphasis           | 51,0479 | 1,9E-38  | 6,85E-37 | 1       |
| wavelet-HHL_gldm_SmallDependenceEmphasis           | 50,9725 | 2,06E-38 | 7,2E-37  | 1       |
| log-sigma-3-0-mm-3D_glcml_Id                       | 50,9572 | 2,22E-38 | 7,51E-37 | 3       |
| original_gldm_SmallDependenceEmphasis              | 50,8618 | 2,35E-38 | 7,73E-37 | 1       |
| wavelet-LHL_glcml_DifferenceEntropy                | 50,6466 | 3,37E-38 | 1,08E-36 | 1       |
| wavelet-LHH_firstorder_Entropy                     | 50,5192 | 3,57E-38 | 1,11E-36 | 1       |
| wavelet-HHL_firstorder_RobustMeanAbsoluteDeviation | 50,3671 | 4,33E-38 | 1,31E-36 | 1       |
| log-sigma-2-0-mm-3D_glcml_SumEntropy               | 50,313  | 4,54E-38 | 1,33E-36 | 1       |
| log-sigma-3-0-mm-3D_glcml_Idm                      | 50,3554 | 4,63E-38 | 1,33E-36 | 3       |
| log-sigma-3-0-mm-3D_glcml_DifferenceEntropy        | 50,1951 | 5,18E-38 | 1,45E-36 | 1       |
| wavelet-LHL_firstorder_Entropy                     | 50,1789 | 5,94E-38 | 1,61E-36 | 1       |
| wavelet-LHH_glcml_JointEntropy                     | 50,0902 | 6,04E-38 | 1,61E-36 | 1       |
| wavelet-HLH_glcml_DifferenceEntropy                | 49,8568 | 8,05E-38 | 2,05E-36 | 1       |

|                                                            |         |          |          |   |
|------------------------------------------------------------|---------|----------|----------|---|
| wavelet-HHL_firstorder_InterquartileRange                  | 49,8548 | 8,07E-38 | 2,05E-36 | 1 |
| wavelet-HLH_glrlm_RunPercentage                            | 49,6418 | 1,13E-37 | 2,74E-36 | 1 |
| wavelet-LHH_glcmm_MaximumProbability                       | 49,5972 | 1,1E-37  | 2,74E-36 | 3 |
| wavelet-LHH_glcmm_SumEntropy                               | 49,4916 | 1,26E-37 | 2,99E-36 | 1 |
| wavelet-HHL_firstorder_MeanAbsoluteDeviation               | 49,3502 | 1,51E-37 | 3,52E-36 | 1 |
| wavelet-HHL_glcmm_Id                                       | 49,3279 | 1,57E-37 | 3,59E-36 | 3 |
| wavelet-LHH_firstorder_Uniformity                          | 49,2159 | 1,75E-37 | 3,9E-36  | 3 |
| original_glcmm_InverseVariance                             | 49,083  | 2,04E-37 | 4,47E-36 | 3 |
| wavelet-HHH_firstorder_Uniformity                          | 49,0623 | 2,12E-37 | 4,57E-36 | 3 |
| wavelet-LHL_gldm_DependenceNonUniformityNormalized         | 49,0171 | 2,24E-37 | 4,73E-36 | 1 |
| wavelet-HLH_firstorder_Uniformity                          | 48,9619 | 2,45E-37 | 5,07E-36 | 3 |
| wavelet-HHH_glrlm_GrayLevelNonUniformityNormalized         | 48,7804 | 3,01E-37 | 6,13E-36 | 3 |
| original_glcmm_Id                                          | 48,7162 | 3,21E-37 | 6,41E-36 | 3 |
| wavelet-HLL_glrlm_RunEntropy                               | 48,4219 | 4,87E-37 | 9,55E-36 | 1 |
| wavelet-LHL_glcmm_InverseVariance                          | 48,341  | 5,42E-37 | 1,05E-35 | 3 |
| log-sigma-3-0-mm-3D_firstorder_Entropy                     | 48,2032 | 5,98E-37 | 1,13E-35 | 1 |
| wavelet-LHL_glcmm_Id                                       | 48,117  | 7,07E-37 | 1,32E-35 | 3 |
| log-sigma-3-0-mm-3D_glszm_ZonePercentage                   | 48,0077 | 8,14E-37 | 1,49E-35 | 1 |
| wavelet-HHH_glcmm_JointEnergy                              | 47,9124 | 8,86E-37 | 1,57E-35 | 3 |
| wavelet-HLL_firstorder_Entropy                             | 47,9206 | 8,83E-37 | 1,57E-35 | 1 |
| wavelet-LHH_firstorder_RobustMeanAbsoluteDeviation         | 47,7421 | 1,1E-36  | 1,92E-35 | 1 |
| wavelet-HLH_glcmm_MaximumProbability                       | 47,6113 | 1,31E-36 | 2,26E-35 | 3 |
| wavelet-HLH_firstorder_RobustMeanAbsoluteDeviation         | 47,5636 | 1,39E-36 | 2,36E-35 | 1 |
| wavelet-HHH_glrlm_ShortRunEmphasis                         | 47,526  | 1,48E-36 | 2,46E-35 | 1 |
| wavelet-HLL_glcmm_DifferenceEntropy                        | 47,3914 | 1,72E-36 | 2,83E-35 | 1 |
| wavelet-LHH_glcmm_DifferenceEntropy                        | 47,3444 | 1,8E-36  | 2,92E-35 | 1 |
| wavelet-LLL_gldm_SmallDependenceEmphasis                   | 47,273  | 2,04E-36 | 3,26E-35 | 1 |
| wavelet-LLL_glcmm_DifferenceEntropy                        | 47,2412 | 2,07E-36 | 3,26E-35 | 1 |
| log-sigma-2-0-mm-3D_gldm_DependenceNonUniformityNormalized | 47,1195 | 2,48E-36 | 3,85E-35 | 1 |
| wavelet-LHH_glrlm_RunLengthNonUniformityNormalized         | 47,0906 | 2,55E-36 | 3,9E-35  | 1 |
| wavelet-HLH_firstorder_InterquartileRange                  | 47,0673 | 2,6E-36  | 3,93E-35 | 1 |
| wavelet-HLL_glcmm_SumEntropy                               | 47,0193 | 2,76E-36 | 4,11E-35 | 1 |
| wavelet-LLL_glszm_SizeZoneNonUniformityNormalized          | 46,9114 | 3,15E-36 | 4,63E-35 | 1 |
| wavelet-HHL_glcmm_DifferenceAverage                        | 46,8846 | 3,27E-36 | 4,74E-35 | 1 |
| wavelet-LLL_gldm_DependenceNonUniformityNormalized         | 46,7444 | 3,99E-36 | 5,72E-35 | 1 |
| original_firstorder_Entropy                                | 46,4696 | 5,72E-36 | 8,1E-35  | 1 |
| wavelet-HLH_firstorder_MeanAbsoluteDeviation               | 46,3863 | 6,12E-36 | 8,56E-35 | 1 |
| log-sigma-3-0-mm-3D_gldm_SmallDependenceEmphasis           | 46,2614 | 7,35E-36 | 1E-34    | 1 |
| original_glcmm_DifferenceAverage                           | 46,2343 | 7,32E-36 | 1E-34    | 1 |
| wavelet-HHH_glrlm_RunLengthNonUniformityNormalized         | 46,0953 | 8,99E-36 | 1,21E-34 | 1 |
| wavelet-HLL_glcmm_Id                                       | 46,0429 | 9,36E-36 | 1,25E-34 | 3 |
| wavelet-LHH_firstorder_MeanAbsoluteDeviation               | 45,9853 | 1,01E-35 | 1,33E-34 | 1 |
| wavelet-HHL_firstorder_90Percentile                        | 45,959  | 1,05E-35 | 1,37E-34 | 1 |
| wavelet-HHH_glcmm_SumEntropy                               | 45,7962 | 1,29E-35 | 1,66E-34 | 1 |
| wavelet-HHH_glrlm_RunPercentage                            | 45,726  | 1,45E-35 | 1,83E-34 | 1 |
| wavelet-HHH_firstorder_Entropy                             | 45,7005 | 1,46E-35 | 1,83E-34 | 1 |
| wavelet-LHL_glcmm_SumEntropy                               | 45,768  | 1,48E-35 | 1,84E-34 | 1 |

|                                                             |         |          |          |   |
|-------------------------------------------------------------|---------|----------|----------|---|
| log-sigma-2-0-mm-3D_glcmm_JointEntropy                      | 45,585  | 1,7E-35  | 2,08E-34 | 1 |
| wavelet-HHH_glcmm_JointEntropy                              | 45,5769 | 1,71E-35 | 2,08E-34 | 1 |
| original_firstorder_90Percentile                            | 45,4938 | 1,93E-35 | 2,32E-34 | 1 |
| wavelet-LHH_firstorder_90Percentile                         | 45,3548 | 2,26E-35 | 2,68E-34 | 1 |
| log-sigma-2-0-mm-3D_glcmm_DifferenceAverage                 | 45,3138 | 2,39E-35 | 2,81E-34 | 1 |
| wavelet-HLH_glcmm_ShortRunEmphasis                          | 45,3027 | 2,62E-35 | 3,05E-34 | 1 |
| log-sigma-3-0-mm-3D_glcmm_SumEntropy                        | 45,1078 | 3,06E-35 | 3,53E-34 | 1 |
| wavelet-HHH_glcmm_MaximumProbability                        | 44,9756 | 3,73E-35 | 4,26E-34 | 3 |
| wavelet-LHH_glcmm_RunPercentage                             | 44,9782 | 3,8E-35  | 4,29E-34 | 1 |
| log-sigma-2-0-mm-3D_firstorder_MeanAbsoluteDeviation        | 44,9247 | 3,91E-35 | 4,37E-34 | 1 |
| wavelet-HHL_glcmm_Idm                                       | 44,8711 | 4,36E-35 | 4,82E-34 | 3 |
| original_glcmm_RunEntropy                                   | 44,8898 | 4,4E-35  | 4,82E-34 | 1 |
| wavelet-HLH_glcmm_GrayLevelNonUniformityNormalized          | 44,632  | 5,79E-35 | 6,29E-34 | 3 |
| log-sigma-2-0-mm-3D_glcmm_RunLengthNonUniformityNormalized  | 44,5879 | 6,34E-35 | 6,82E-34 | 1 |
| wavelet-HHH_glcmm_DifferenceEntropy                         | 44,3121 | 8,8E-35  | 9,37E-34 | 1 |
| wavelet-HLL_glcmm_InverseVariance                           | 44,2938 | 8,97E-35 | 9,38E-34 | 3 |
| wavelet-LLL_firstorder_90Percentile                         | 44,3077 | 8,94E-35 | 9,38E-34 | 1 |
| wavelet-LHL_glcmm_SmallAreaEmphasis                         | 44,1199 | 1,13E-34 | 1,17E-33 | 1 |
| wavelet-LLL_glcmm_SmallAreaEmphasis                         | 44,1084 | 1,15E-34 | 1,18E-33 | 1 |
| wavelet-HHL_glcmm_JointEntropy                              | 44,1199 | 1,22E-34 | 1,24E-33 | 1 |
| wavelet-LHH_firstorder_InterquartileRange                   | 43,9652 | 1,39E-34 | 1,4E-33  | 1 |
| wavelet-LLL_glcmm_Id                                        | 43,892  | 1,51E-34 | 1,51E-33 | 3 |
| wavelet-LLL_glcmm_DifferenceAverage                         | 43,7968 | 1,71E-34 | 1,69E-33 | 1 |
| wavelet-HHH_glcmm_Id                                        | 43,5861 | 2,28E-34 | 2,23E-33 | 3 |
| log-sigma-3-0-mm-3D_glcmm_JointEntropy                      | 43,5658 | 2,3E-34  | 2,24E-33 | 1 |
| wavelet-HHH_glcmm_Idm                                       | 43,5661 | 2,34E-34 | 2,25E-33 | 3 |
| log-sigma-3-0-mm-3D_glcmm_DifferenceAverage                 | 43,4142 | 2,85E-34 | 2,73E-33 | 1 |
| wavelet-LHL_firstorder_90Percentile                         | 43,3859 | 3,06E-34 | 2,9E-33  | 1 |
| log-sigma-2-0-mm-3D_firstorder_RobustMeanAbsoluteDeviation  | 43,2589 | 3,47E-34 | 3,26E-33 | 1 |
| original_glcmm_Idm                                          | 43,1849 | 3,81E-34 | 3,55E-33 | 3 |
| original_glcmm_DependenceNonUniformityNormalized            | 43,1941 | 3,88E-34 | 3,58E-33 | 1 |
| wavelet-HLL_glcmm_DependenceNonUniformityNormalized         | 43,1766 | 3,98E-34 | 3,64E-33 | 1 |
| wavelet-LHL_glcmm_DifferenceAverage                         | 43,1525 | 4,11E-34 | 3,74E-33 | 1 |
| wavelet-LHH_firstorder_10Percentile                         | 42,8912 | 5,73E-34 | 5,16E-33 | 3 |
| wavelet-LHL_firstorder_MeanAbsoluteDeviation                | 42,8692 | 5,97E-34 | 5,34E-33 | 1 |
| wavelet-LLL_glcmm_ZonePercentage                            | 42,8468 | 6,29E-34 | 5,58E-33 | 1 |
| wavelet-LHH_glcmm_GrayLevelNonUniformityNormalized          | 42,7578 | 6,77E-34 | 5,96E-33 | 3 |
| wavelet-LHL_glcmm_SizeZoneNonUniformityNormalized           | 42,7484 | 6,84E-34 | 5,97E-33 | 1 |
| wavelet-HHH_glcmm_LargeDependenceEmphasis                   | 42,7261 | 7,29E-34 | 6,32E-33 | 3 |
| original_glcmm_SumEntropy                                   | 42,7143 | 7,43E-34 | 6,39E-33 | 1 |
| log-sigma-3-0-mm-3D_glcmm_RunEntropy                        | 42,5849 | 8,94E-34 | 7,63E-33 | 1 |
| log-sigma-2-0-mm-3D_firstorder_InterquartileRange           | 42,4589 | 1E-33    | 8,49E-33 | 1 |
| wavelet-HLH_firstorder_90Percentile                         | 42,4524 | 1,04E-33 | 8,76E-33 | 1 |
| log-sigma-3-0-mm-3D_glcmm_DependenceNonUniformityNormalized | 42,4012 | 1,2E-33  | 9,97E-33 | 1 |
| wavelet-LHL_glcmm_Idm                                       | 42,1243 | 1,63E-33 | 1,35E-32 | 3 |
| wavelet-LHL_firstorder_InterquartileRange                   | 42,0929 | 1,66E-33 | 1,37E-32 | 1 |
| wavelet-LHL_firstorder_RobustMeanAbsoluteDeviation          | 42,0274 | 1,82E-33 | 1,48E-32 | 1 |

|                                                            |         |          |          |   |
|------------------------------------------------------------|---------|----------|----------|---|
| wavelet-LLL_firstorder_Entropy                             | 41,8996 | 2,22E-33 | 1,8E-32  | 1 |
| wavelet-LLL_glrIm_RunEntropy                               | 41,8144 | 2,5E-33  | 2,01E-32 | 1 |
| log-sigma-3-0-mm-3D_glrIm_RunLengthNonUniformityNormalized | 41,857  | 2,53E-33 | 2,02E-32 | 1 |
| wavelet-HLL_firstorder_90Percentile                        | 41,78   | 2,54E-33 | 2,02E-32 | 1 |
| wavelet-HHH_firstorder_RobustMeanAbsoluteDeviation         | 41,5632 | 3,38E-33 | 2,66E-32 | 1 |
| log-sigma-2-0-mm-3D_glrIm_GrayLevelNonUniformityNormalized | 41,5118 | 3,54E-33 | 2,77E-32 | 3 |
| wavelet-HLH_gldm_LargeDependenceEmphasis                   | 41,5446 | 3,76E-33 | 2,92E-32 | 3 |
| wavelet-HLH_firstorder_10Percentile                        | 41,1155 | 6,23E-33 | 4,81E-32 | 3 |
| wavelet-HHH_glrIm_LongRunEmphasis                          | 41,0253 | 7,2E-33  | 5,52E-32 | 3 |
| wavelet-LHH_glcm_DifferenceAverage                         | 40,8985 | 8,32E-33 | 6,33E-32 | 1 |
| log-sigma-3-0-mm-3D_glrIm_GrayLevelNonUniformityNormalized | 40,7751 | 9,57E-33 | 7,23E-32 | 3 |
| log-sigma-3-0-mm-3D_firstorder_MeanAbsoluteDeviation       | 40,7018 | 1,06E-32 | 7,98E-32 | 1 |
| wavelet-HLL_glcm_Idm                                       | 40,4696 | 1,49E-32 | 1,11E-31 | 3 |
| wavelet-LHH_glrIm_ShortRunEmphasis                         | 39,8662 | 3,5E-32  | 2,59E-31 | 1 |
| wavelet-HHH_firstorder_InterquartileRange                  | 39,7857 | 3,82E-32 | 2,81E-31 | 1 |
| log-sigma-4-0-mm-3D_glcm_InverseVariance                   | 39,6072 | 4,87E-32 | 3,56E-31 | 3 |
| wavelet-HHH_firstorder_MeanAbsoluteDeviation               | 39,5928 | 5E-32    | 3,63E-31 | 1 |
| log-sigma-3-0-mm-3D_firstorder_RobustMeanAbsoluteDeviation | 39,519  | 5,45E-32 | 3,93E-31 | 1 |
| wavelet-LLH_glcm_InverseVariance                           | 39,4413 | 6,2E-32  | 4,44E-31 | 3 |
| wavelet-HLH_glcm_DifferenceAverage                         | 39,4104 | 6,53E-32 | 4,65E-31 | 1 |
| log-sigma-4-0-mm-3D_glcm_DifferenceEntropy                 | 39,342  | 7,01E-32 | 4,96E-31 | 1 |
| log-sigma-4-0-mm-3D_glcm_Id                                | 39,2914 | 7,65E-32 | 5,38E-31 | 3 |
| log-sigma-4-0-mm-3D_glcm_Idm                               | 39,2651 | 7,95E-32 | 5,56E-31 | 3 |
| wavelet-LLH_glcm_DifferenceEntropy                         | 39,0967 | 9,65E-32 | 6,7E-31  | 1 |
| wavelet-HLH_glrIm_RunEntropy                               | 39,1382 | 9,75E-32 | 6,73E-31 | 1 |
| log-sigma-3-0-mm-3D_firstorder_Uniformity                  | 38,8733 | 1,34E-31 | 9,19E-31 | 3 |
| log-sigma-4-0-mm-3D_firstorder_Entropy                     | 38,8643 | 1,37E-31 | 9,35E-31 | 1 |
| original_firstorder_MeanAbsoluteDeviation                  | 38,6901 | 1,81E-31 | 1,22E-30 | 1 |
| wavelet-HHH_glrIm_RunVariance                              | 38,6181 | 1,99E-31 | 1,34E-30 | 3 |
| wavelet-HLH_glcm_JointEnergy                               | 38,6038 | 2,06E-31 | 1,38E-30 | 3 |
| wavelet-HHL_gldm_DependenceNonUniformityNormalized         | 38,4458 | 2,46E-31 | 1,64E-30 | 1 |
| log-sigma-3-0-mm-3D_firstorder_InterquartileRange          | 38,2556 | 3,2E-31  | 2,11E-30 | 1 |
| log-sigma-2-0-mm-3D_firstorder_Uniformity                  | 38,2421 | 3,24E-31 | 2,13E-30 | 3 |
| wavelet-HLL_firstorder_MeanAbsoluteDeviation               | 38,2006 | 3,49E-31 | 2,28E-30 | 1 |
| log-sigma-2-0-mm-3D_glszm_GrayLevelNonUniformityNormalized | 38,1936 | 3,95E-31 | 2,57E-30 | 3 |
| original_firstorder_InterquartileRange                     | 38,0688 | 4,32E-31 | 2,79E-30 | 1 |
| wavelet-LLH_glcm_Id                                        | 38,0368 | 4,48E-31 | 2,88E-30 | 3 |
| wavelet-HHH_firstorder_90Percentile                        | 37,9077 | 5,29E-31 | 3,38E-30 | 1 |
| original_firstorder_RobustMeanAbsoluteDeviation            | 37,8712 | 5,71E-31 | 3,63E-30 | 1 |
| log-sigma-4-0-mm-3D_glszm_ZonePercentage                   | 37,7463 | 6,68E-31 | 4,22E-30 | 1 |
| wavelet-LLL_glcm_InverseVariance                           | 37,6306 | 7,8E-31  | 4,9E-30  | 3 |
| log-sigma-2-0-mm-3D_glrIm_RunPercentage                    | 37,5357 | 9,32E-31 | 5,81E-30 | 1 |
| wavelet-LHH_gldm_LargeDependenceEmphasis                   | 37,5266 | 9,35E-31 | 5,81E-30 | 3 |
| log-sigma-3-0-mm-3D_glrIm_RunPercentage                    | 37,5703 | 9,53E-31 | 5,89E-30 | 1 |
| log-sigma-2-0-mm-3D_glszm_ZoneEntropy                      | 37,3301 | 1,25E-30 | 7,66E-30 | 1 |
| wavelet-LLH_glcm_Idm                                       | 37,2823 | 1,31E-30 | 8,02E-30 | 3 |
| log-sigma-2-0-mm-3D_glrIm_ShortRunEmphasis                 | 37,2843 | 1,32E-30 | 8,02E-30 | 1 |

|                                                            |         |          |          |   |
|------------------------------------------------------------|---------|----------|----------|---|
| wavelet-HHL_glrlm_GrayLevelNonUniformityNormalized         | 37,2548 | 1,4E-30  | 8,47E-30 | 3 |
| wavelet-HLH_glrlm_RunVariance                              | 37,2157 | 1,51E-30 | 9,07E-30 | 3 |
| log-sigma-4-0-mm-3D_glcmm_DifferenceAverage                | 37,0685 | 1,73E-30 | 1,03E-29 | 1 |
| wavelet-LLH_firstorder_Entropy                             | 36,6532 | 3,1E-30  | 1,84E-29 | 1 |
| log-sigma-4-0-mm-3D_glcmm_SumEntropy                       | 36,6473 | 3,2E-30  | 1,89E-29 | 1 |
| log-sigma-3-0-mm-3D_glrlm_ShortRunEmphasis                 | 36,6784 | 3,37E-30 | 1,98E-29 | 1 |
| wavelet-LLL_glcmm_Idm                                      | 36,6036 | 3,4E-30  | 1,99E-29 | 3 |
| wavelet-HLL_firstorder_RobustMeanAbsoluteDeviation         | 36,5894 | 3,47E-30 | 2,02E-29 | 1 |
| wavelet-HLL_glcmm_DifferenceAverage                        | 36,5418 | 3,72E-30 | 2,15E-29 | 1 |
| log-sigma-4-0-mm-3D_gldmm_SmallDependenceEmphasis          | 36,3952 | 4,61E-30 | 2,66E-29 | 1 |
| wavelet-LHH_glcmm_JointEntropy                             | 36,376  | 4,7E-30  | 2,69E-29 | 3 |
| log-sigma-4-0-mm-3D_glcmm_JointEntropy                     | 36,2524 | 5,64E-30 | 3,22E-29 | 1 |
| log-sigma-3-0-mm-3D_glszm_SizeZoneNonUniformityNormalized  | 36,1931 | 6,11E-30 | 3,47E-29 | 1 |
| wavelet-HLL_firstorder_InterquartileRange                  | 36,0847 | 7,22E-30 | 4,08E-29 | 1 |
| wavelet-HLH_glrlm_LongRunEmphasis                          | 35,938  | 9,53E-30 | 5,35E-29 | 3 |
| wavelet-LLL_glcmm_SumEntropy                               | 35,7522 | 1,19E-29 | 6,65E-29 | 1 |
| wavelet-HHH_firstorder_10Percentile                        | 35,5595 | 1,55E-29 | 8,63E-29 | 3 |
| wavelet-HLL_glcmm_JointEntropy                             | 35,4647 | 1,83E-29 | 1,01E-28 | 1 |
| original_glcmm_JointEntropy                                | 35,4547 | 1,85E-29 | 1,02E-28 | 1 |
| wavelet-LLH_glcmm_DifferenceAverage                        | 35,3794 | 2,01E-29 | 1,1E-28  | 1 |
| wavelet-LLL_firstorder_MeanAbsoluteDeviation               | 35,2506 | 2,5E-29  | 1,36E-28 | 1 |
| wavelet-LHL_glcmm_JointEntropy                             | 35,0682 | 3,39E-29 | 1,84E-28 | 1 |
| wavelet-LLH_firstorder_MeanAbsoluteDeviation               | 34,9685 | 3,69E-29 | 1,99E-28 | 1 |
| wavelet-LHH_gldmm_DependenceVariance                       | 34,9132 | 4,1E-29  | 2,2E-28  | 3 |
| wavelet-LLH_glszm_ZonePercentage                           | 34,837  | 4,57E-29 | 2,44E-28 | 1 |
| wavelet-HHL_glrlm_RunLengthNonUniformityNormalized         | 34,7764 | 4,83E-29 | 2,57E-28 | 1 |
| original_glszm_GrayLevelNonUniformityNormalized            | 34,7897 | 5,05E-29 | 2,67E-28 | 3 |
| log-sigma-5-0-mm-3D_glcmm_DifferenceEntropy                | 34,7622 | 5,07E-29 | 2,67E-28 | 1 |
| wavelet-LHH_glrlm_RunEntropy                               | 34,7718 | 5,19E-29 | 2,72E-28 | 1 |
| wavelet-LLH_gldmm_SmallDependenceEmphasis                  | 34,7215 | 5,38E-29 | 2,81E-28 | 1 |
| log-sigma-2-0-mm-3D_firstorder_90Percentile                | 34,5931 | 6,47E-29 | 3,36E-28 | 1 |
| wavelet-HHL_gldmm_DependenceEntropy                        | 34,579  | 6,75E-29 | 3,49E-28 | 1 |
| wavelet-HLL_glrlm_RunLengthNonUniformityNormalized         | 34,5002 | 7,42E-29 | 3,82E-28 | 1 |
| original_glrlm_RunLengthNonUniformityNormalized            | 34,3743 | 8,98E-29 | 4,61E-28 | 1 |
| wavelet-LLL_firstorder_RobustMeanAbsoluteDeviation         | 34,2367 | 1,11E-28 | 5,68E-28 | 1 |
| wavelet-HHL_firstorder_Uniformity                          | 34,0257 | 1,54E-28 | 7,85E-28 | 3 |
| log-sigma-4-0-mm-3D_glrlm_RunEntropy                       | 34,0028 | 1,59E-28 | 8,04E-28 | 1 |
| wavelet-LLH_glcmm_SumEntropy                               | 33,9273 | 1,7E-28  | 8,54E-28 | 1 |
| log-sigma-4-0-mm-3D_glrlm_RunLengthNonUniformityNormalized | 33,9172 | 1,85E-28 | 9,21E-28 | 1 |
| wavelet-LLL_firstorder_RootMeanSquared                     | 33,8806 | 1,84E-28 | 9,21E-28 | 1 |
| wavelet-HHH_glrlm_RunEntropy                               | 33,7911 | 2,18E-28 | 1,08E-27 | 1 |
| wavelet-LLL_glszm_GrayLevelNonUniformityNormalized         | 33,6327 | 2,77E-28 | 1,37E-27 | 3 |
| wavelet-LHH_glrlm_RunVariance                              | 33,5789 | 2,99E-28 | 1,47E-27 | 3 |
| wavelet-HHL_glszm_ZoneEntropy                              | 33,5413 | 3,31E-28 | 1,62E-27 | 1 |
| wavelet-LHL_glrlm_RunLengthNonUniformityNormalized         | 33,4099 | 3,7E-28  | 1,81E-27 | 1 |
| wavelet-LLL_firstorder_InterquartileRange                  | 33,2812 | 4,64E-28 | 2,26E-27 | 1 |
| wavelet-HHH_gldmm_DependenceEntropy                        | 33,2584 | 4,77E-28 | 2,31E-27 | 1 |

|                                                            |         |          |          |   |
|------------------------------------------------------------|---------|----------|----------|---|
| log-sigma-2-0-mm-3D_firstorder_10Percentile                | 33,2184 | 5,06E-28 | 2,44E-27 | 3 |
| wavelet-LHL_glszm_GrayLevelNonUniformityNormalized         | 33,1987 | 5,75E-28 | 2,76E-27 | 3 |
| wavelet-HHH_glszm_ZoneEntropy                              | 32,9691 | 7,6E-28  | 3,63E-27 | 1 |
| wavelet-HLH_gldm_DependenceVariance                        | 32,969  | 7,8E-28  | 3,71E-27 | 3 |
| wavelet-HHH_glcm_DifferenceAverage                         | 32,8475 | 8,8E-28  | 4,17E-27 | 1 |
| log-sigma-3-0-mm-3D_glszm_SmallAreaEmphasis                | 32,8279 | 9,23E-28 | 4,36E-27 | 1 |
| wavelet-LHL_firstorder_10Percentile                        | 32,8055 | 9,37E-28 | 4,4E-27  | 3 |
| wavelet-LLH_glrlm_RunLengthNonUniformityNormalized         | 32,8007 | 9,88E-28 | 4,62E-27 | 1 |
| wavelet-LLH_glcm_JointEntropy                              | 32,6565 | 1,15E-27 | 5,35E-27 | 1 |
| log-sigma-5-0-mm-3D_glcm_Idm                               | 32,5586 | 1,33E-27 | 6,19E-27 | 3 |
| original_glrlm_GrayLevelNonUniformityNormalized            | 32,5282 | 1,44E-27 | 6,67E-27 | 3 |
| log-sigma-5-0-mm-3D_glcm_Id                                | 32,2826 | 2,03E-27 | 9,36E-27 | 3 |
| wavelet-LLH_firstorder_RobustMeanAbsoluteDeviation         | 32,2493 | 2,23E-27 | 1,02E-26 | 1 |
| log-sigma-4-0-mm-3D_gldm_DependenceNonUniformityNormalized | 32,014  | 3,31E-27 | 1,51E-26 | 1 |
| wavelet-LLH_firstorder_InterquartileRange                  | 31,961  | 3,49E-27 | 1,59E-26 | 1 |
| log-sigma-4-0-mm-3D_firstorder_MeanAbsoluteDeviation       | 31,9299 | 3,54E-27 | 1,6E-26  | 1 |
| original_firstorder_RootMeanSquared                        | 31,9065 | 3,68E-27 | 1,66E-26 | 1 |
| wavelet-HLH_gldm_SmallDependenceEmphasis                   | 31,864  | 3,99E-27 | 1,79E-26 | 1 |
| original_glszm_HighGrayLevelZoneEmphasis                   | 31,8018 | 4,77E-27 | 2,13E-26 | 1 |
| wavelet-LHH_glrlm_LongRunEmphasis                          | 31,6186 | 5,91E-27 | 2,63E-26 | 3 |
| wavelet-HLH_glszm_GrayLevelNonUniformityNormalized         | 31,5812 | 5,97E-27 | 2,65E-26 | 3 |
| original_firstorder_Uniformity                             | 31,5933 | 6,03E-27 | 2,67E-26 | 3 |
| wavelet-LLH_glrlm_RunEntropy                               | 31,5535 | 6,39E-27 | 2,81E-26 | 1 |
| wavelet-HHL_glszm_GrayLevelNonUniformityNormalized         | 31,4784 | 8,08E-27 | 3,54E-26 | 3 |
| wavelet-HLH_glszm_ZoneEntropy                              | 31,3554 | 8,72E-27 | 3,81E-26 | 1 |
| wavelet-HLL_glrlm_GrayLevelNonUniformityNormalized         | 31,3339 | 8,91E-27 | 3,88E-26 | 3 |
| log-sigma-5-0-mm-3D_glcm_JointEntropy                      | 31,341  | 9,09E-27 | 3,94E-26 | 1 |
| original_glszm_SmallAreaHighGrayLevelEmphasis              | 31,1542 | 1,31E-26 | 5,65E-26 | 1 |
| log-sigma-4-0-mm-3D_glrlm_RunPercentage                    | 31,0682 | 1,44E-26 | 6,19E-26 | 1 |
| wavelet-LLH_gldm_DependenceNonUniformityNormalized         | 30,9595 | 1,65E-26 | 7,08E-26 | 1 |
| original_glcm_JointAverage                                 | 30,9956 | 1,66E-26 | 7,1E-26  | 1 |
| wavelet-HLL_glszm_SmallAreaEmphasis                        | 30,7116 | 2,33E-26 | 9,92E-26 | 1 |
| wavelet-HLH_gldm_DependenceEntropy                         | 30,6895 | 2,5E-26  | 1,06E-25 | 1 |
| log-sigma-5-0-mm-3D_firstorder_Entropy                     | 30,6839 | 2,54E-26 | 1,07E-25 | 1 |
| wavelet-LLL_glrlm_RunLengthNonUniformityNormalized         | 30,5802 | 3,02E-26 | 1,27E-25 | 1 |
| wavelet-HLL_glszm_GrayLevelNonUniformityNormalized         | 30,551  | 3,09E-26 | 1,29E-25 | 3 |
| wavelet-HLL_glrlm_ShortRunEmphasis                         | 30,4952 | 3,33E-26 | 1,39E-25 | 1 |
| wavelet-HLL_gldm_DependenceEntropy                         | 30,4922 | 3,39E-26 | 1,41E-25 | 1 |
| wavelet-HHL_glrlm_RunPercentage                            | 30,4076 | 3,75E-26 | 1,55E-25 | 1 |
| wavelet-HLL_firstorder_10Percentile                        | 30,3963 | 3,85E-26 | 1,59E-25 | 3 |
| wavelet-LLL_firstorder_Mean                                | 30,382  | 3,93E-26 | 1,62E-25 | 1 |
| wavelet-LHL_gldm_DependenceEntropy                         | 30,3442 | 4,31E-26 | 1,76E-25 | 1 |
| original_glrlm_ShortRunHighGrayLevelEmphasis               | 30,3177 | 4,8E-26  | 1,96E-25 | 1 |
| wavelet-LHL_glrlm_GrayLevelNonUniformityNormalized         | 30,2822 | 4,99E-26 | 2,03E-25 | 3 |
| wavelet-LLH_firstorder_90Percentile                        | 30,2075 | 5,17E-26 | 2,1E-25  | 1 |
| wavelet-LLL_gldm_SmallDependenceHighGrayLevelEmphasis      | 30,2577 | 5,19E-26 | 2,1E-25  | 1 |
| wavelet-LHH_gldm_DependenceEntropy                         | 30,2204 | 5,22E-26 | 2,1E-25  | 1 |

|                                                            |         |          |          |   |
|------------------------------------------------------------|---------|----------|----------|---|
| original_gldm_SmallDependenceHighGrayLevelEmphasis         | 30,2411 | 5,37E-26 | 2,15E-25 | 1 |
| wavelet-HLL_glrlm_RunPercentage                            | 30,1266 | 5,97E-26 | 2,38E-25 | 1 |
| original_glrlm_RunPercentage                               | 30,1132 | 6,14E-26 | 2,44E-25 | 1 |
| original_firstorder_Mean                                   | 30,0182 | 6,98E-26 | 2,77E-25 | 1 |
| wavelet-LHH_firstorder_Variance                            | 30,0141 | 7,08E-26 | 2,8E-25  | 1 |
| wavelet-HHL_glrlm_ShortRunEmphasis                         | 29,8326 | 9,28E-26 | 3,65E-25 | 1 |
| wavelet-LLL_glszm_SmallAreaHighGrayLevelEmphasis           | 29,8359 | 1,01E-25 | 3,95E-25 | 1 |
| original_glrlm_ShortRunEmphasis                            | 29,7366 | 1,11E-25 | 4,31E-25 | 1 |
| wavelet-LHH_glrlm_GrayLevelVariance                        | 29,7336 | 1,1E-25  | 4,31E-25 | 1 |
| original_glrlm_HighGrayLevelRunEmphasis                    | 29,7548 | 1,16E-25 | 4,52E-25 | 1 |
| wavelet-LLL_glrlm_GrayLevelNonUniformityNormalized         | 29,676  | 1,22E-25 | 4,71E-25 | 3 |
| log-sigma-5-0-mm-3D_gldm_SmallDependenceEmphasis           | 29,6599 | 1,23E-25 | 4,75E-25 | 1 |
| wavelet-HLL_firstorder_Uniformity                          | 29,6004 | 1,35E-25 | 5,2E-25  | 3 |
| log-sigma-4-0-mm-3D_glrlm_GrayLevelNonUniformityNormalized | 29,5855 | 1,38E-25 | 5,3E-25  | 3 |
| log-sigma-4-0-mm-3D_firstorder_RobustMeanAbsoluteDeviation | 29,5754 | 1,4E-25  | 5,35E-25 | 1 |
| log-sigma-4-0-mm-3D_glrlm_ShortRunEmphasis                 | 29,6035 | 1,42E-25 | 5,41E-25 | 1 |
| original_gldm_HighGrayLevelEmphasis                        | 29,5743 | 1,55E-25 | 5,87E-25 | 1 |
| log-sigma-5-0-mm-3D_gldm_SumEntropy                        | 29,4683 | 1,71E-25 | 6,47E-25 | 1 |
| wavelet-LLH_firstorder_10Percentile                        | 29,4632 | 1,72E-25 | 6,47E-25 | 3 |
| wavelet-HLL_glszm_SizeZoneNonUniformityNormalized          | 29,425  | 1,79E-25 | 6,7E-25  | 1 |
| wavelet-LHH_gldm_ClusterTendency                           | 29,417  | 1,83E-25 | 6,85E-25 | 1 |
| wavelet-LHH_gldm_GrayLevelVariance                         | 29,388  | 1,91E-25 | 7,13E-25 | 1 |
| wavelet-LLH_glrlm_RunPercentage                            | 29,3322 | 2,19E-25 | 8,13E-25 | 1 |
| wavelet-LLL_firstorder_Uniformity                          | 29,2788 | 2,29E-25 | 8,48E-25 | 3 |
| wavelet-LHL_glrlm_RunPercentage                            | 29,2609 | 2,31E-25 | 8,51E-25 | 1 |
| log-sigma-5-0-mm-3D_gldm_DifferenceAverage                 | 29,2262 | 2,44E-25 | 8,96E-25 | 1 |
| log-sigma-2-0-mm-3D_firstorder_Maximum                     | 29,1766 | 2,81E-25 | 1,03E-24 | 1 |
| wavelet-LLH_glrlm_ShortRunEmphasis                         | 28,9226 | 4,2E-25  | 1,54E-24 | 1 |
| log-sigma-4-0-mm-3D_firstorder_Uniformity                  | 28,8849 | 4,25E-25 | 1,55E-24 | 3 |
| log-sigma-4-0-mm-3D_firstorder_InterquartileRange          | 28,8125 | 4,75E-25 | 1,72E-24 | 1 |
| wavelet-LLL_glrlm_RunPercentage                            | 28,8439 | 4,74E-25 | 1,72E-24 | 1 |
| log-sigma-3-0-mm-3D_gldm_Contrast                          | 28,807  | 4,83E-25 | 1,74E-24 | 1 |
| wavelet-LHL_glrlm_ShortRunEmphasis                         | 28,766  | 5,1E-25  | 1,83E-24 | 1 |
| log-sigma-5-0-mm-3D_glrlm_RunLengthNonUniformityNormalized | 28,6084 | 6,71E-25 | 2,4E-24  | 1 |
| log-sigma-2-0-mm-3D_glrlm_GrayLevelVariance                | 28,5771 | 6,98E-25 | 2,49E-24 | 1 |
| wavelet-LHL_firstorder_Uniformity                          | 28,601  | 7,19E-25 | 2,56E-24 | 3 |
| log-sigma-2-0-mm-3D_firstorder_Variance                    | 28,5247 | 7,59E-25 | 2,69E-24 | 1 |
| wavelet-LHH_gldm_SmallDependenceEmphasis                   | 28,4672 | 8,4E-25  | 2,97E-24 | 1 |
| log-sigma-2-0-mm-3D_gldm_GrayLevelVariance                 | 28,4469 | 8,6E-25  | 3,03E-24 | 1 |
| wavelet-LLL_glszm_HighGrayLevelZoneEmphasis                | 28,4348 | 9,38E-25 | 3,3E-24  | 1 |
| wavelet-LLL_glrlm_ShortRunEmphasis                         | 28,4079 | 9,56E-25 | 3,35E-24 | 1 |
| wavelet-LHH_gldm_SumSquares                                | 28,343  | 1,03E-24 | 3,59E-24 | 1 |
| wavelet-LHH_gldm_DependenceNonUniformityNormalized         | 28,3101 | 1,09E-24 | 3,81E-24 | 1 |
| wavelet-LLH_gldm_GrayLevelVariance                         | 28,1914 | 1,31E-24 | 4,55E-24 | 1 |
| log-sigma-2-0-mm-3D_glszm_GrayLevelVariance                | 28,2065 | 1,33E-24 | 4,6E-24  | 1 |
| wavelet-LLH_firstorder_Variance                            | 28,1795 | 1,33E-24 | 4,6E-24  | 1 |
| wavelet-HLH_glszm_ZonePercentage                           | 28,1299 | 1,47E-24 | 5,04E-24 | 1 |

|                                                            |         |          |          |   |
|------------------------------------------------------------|---------|----------|----------|---|
| wavelet-LLH_glrIm_GrayLevelVariance                        | 28,0369 | 1,68E-24 | 5,76E-24 | 1 |
| wavelet-LLH_glrIm_GrayLevelNonUniformityNormalized         | 27,9913 | 1,8E-24  | 6,15E-24 | 3 |
| log-sigma-2-0-mm-3D_glszm_SizeZoneNonUniformityNormalized  | 27,9029 | 2,07E-24 | 7,07E-24 | 1 |
| log-sigma-2-0-mm-3D_glszm_SmallAreaEmphasis                | 27,9035 | 2,08E-24 | 7,07E-24 | 1 |
| original_glcM_Contrast                                     | 27,8947 | 2,12E-24 | 7,19E-24 | 1 |
| original_glszm_SizeZoneNonUniformityNormalized             | 27,8867 | 2,15E-24 | 7,25E-24 | 1 |
| original_glszm_SmallAreaEmphasis                           | 27,8595 | 2,29E-24 | 7,72E-24 | 1 |
| log-sigma-3-0-mm-3D_glszm_GrayLevelNonUniformityNormalized | 27,8504 | 2,34E-24 | 7,86E-24 | 3 |
| log-sigma-4-0-mm-3D_glszm_ZoneEntropy                      | 27,7965 | 2,56E-24 | 8,58E-24 | 1 |
| wavelet-LLL_glrIm_ShortRunHighGrayLevelEmphasis            | 27,6974 | 3,11E-24 | 1,04E-23 | 1 |
| wavelet-LLL_glcM_JointAverage                              | 27,6057 | 3,6E-24  | 1,2E-23  | 1 |
| wavelet-HHH_gldM_SmallDependenceEmphasis                   | 27,5727 | 3,63E-24 | 1,2E-23  | 1 |
| wavelet-HLH_glcM_InverseVariance                           | 27,4854 | 4,17E-24 | 1,38E-23 | 3 |
| log-sigma-5-0-mm-3D_glrIm_RunPercentage                    | 27,49   | 4,21E-24 | 1,39E-23 | 1 |
| wavelet-LLL_glrIm_HighGrayLevelRunEmphasis                 | 27,3948 | 5,09E-24 | 1,68E-23 | 1 |
| log-sigma-5-0-mm-3D_glszm_ZoneEntropy                      | 27,3673 | 5,3E-24  | 1,74E-23 | 1 |
| wavelet-LLL_glcM_Contrast                                  | 27,2975 | 5,64E-24 | 1,84E-23 | 1 |
| wavelet-LLL_gldM_HighGrayLevelEmphasis                     | 27,302  | 5,93E-24 | 1,93E-23 | 1 |
| wavelet-HLL_glszm_ZoneEntropy                              | 27,2409 | 6,33E-24 | 2,06E-23 | 1 |
| log-sigma-5-0-mm-3D_glszm_ZonePercentage                   | 27,2226 | 6,39E-24 | 2,07E-23 | 1 |
| wavelet-LHH_glszm_GrayLevelNonUniformityNormalized         | 27,0687 | 8,15E-24 | 2,63E-23 | 3 |
| log-sigma-3-0-mm-3D_gldM_GrayLevelVariance                 | 27,0247 | 8,76E-24 | 2,82E-23 | 1 |
| log-sigma-3-0-mm-3D_firstorder_Variance                    | 27,0123 | 8,94E-24 | 2,87E-23 | 1 |
| wavelet-LLL_firstorder_Median                              | 26,9237 | 1,04E-23 | 3,34E-23 | 1 |
| wavelet-LLL_glszm_ZoneEntropy                              | 26,906  | 1,09E-23 | 3,49E-23 | 1 |
| log-sigma-3-0-mm-3D_glrIm_GrayLevelVariance                | 26,8758 | 1,12E-23 | 3,58E-23 | 1 |
| wavelet-HLH_glszm_GrayLevelVariance                        | 26,8698 | 1,16E-23 | 3,68E-23 | 1 |
| wavelet-LLH_firstorder_Uniformity                          | 26,6087 | 1,77E-23 | 5,62E-23 | 3 |
| log-sigma-2-0-mm-3D_glcM_SumSquares                        | 26,5332 | 1,99E-23 | 6,29E-23 | 1 |
| log-sigma-2-0-mm-3D_firstorder_Range                       | 26,5199 | 2,15E-23 | 6,77E-23 | 1 |
| original_glrIm_LongRunHighGrayLevelEmphasis                | 26,5287 | 2,16E-23 | 6,78E-23 | 1 |
| log-sigma-3-0-mm-3D_glcM_DifferenceVariance                | 26,4791 | 2,18E-23 | 6,83E-23 | 1 |
| wavelet-LHH_glcM_Contrast                                  | 26,4647 | 2,25E-23 | 7,03E-23 | 1 |
| original_firstorder_Median                                 | 26,3296 | 2,79E-23 | 8,7E-23  | 1 |
| wavelet-LHH_glszm_GrayLevelVariance                        | 26,3339 | 2,81E-23 | 8,73E-23 | 1 |
| log-sigma-2-0-mm-3D_gldM_DependenceEntropy                 | 26,3264 | 2,86E-23 | 8,83E-23 | 1 |
| log-sigma-3-0-mm-3D_glcM_SumSquares                        | 26,3124 | 2,86E-23 | 8,83E-23 | 1 |
| log-sigma-2-0-mm-3D_glcM_DifferenceVariance                | 26,3127 | 2,89E-23 | 8,92E-23 | 1 |
| wavelet-LLH_firstorder_Minimum                             | 26,3007 | 2,94E-23 | 9,04E-23 | 3 |
| log-sigma-5-0-mm-3D_firstorder_MeanAbsoluteDeviation       | 26,2481 | 3,27E-23 | 1E-22    | 1 |
| log-sigma-2-0-mm-3D_glcM_Contrast                          | 26,1695 | 3,68E-23 | 1,13E-22 | 1 |
| original_glcM_Autocorrelation                              | 26,207  | 3,71E-23 | 1,13E-22 | 1 |
| log-sigma-3-0-mm-3D_glszm_ZoneEntropy                      | 26,0864 | 4,29E-23 | 1,3E-22  | 1 |
| log-sigma-3-0-mm-3D_firstorder_Range                       | 26,103  | 4,3E-23  | 1,3E-22  | 1 |
| wavelet-HHL_glrIm_GrayLevelVariance                        | 25,9774 | 5,09E-23 | 1,54E-22 | 1 |
| log-sigma-2-0-mm-3D_glcM_ClusterTendency                   | 25,9614 | 5,17E-23 | 1,56E-22 | 1 |
| wavelet-LHH_glcM_DifferenceVariance                        | 25,9237 | 5,56E-23 | 1,67E-22 | 1 |

|                                                            |         |          |          |   |
|------------------------------------------------------------|---------|----------|----------|---|
| wavelet-LLL_glrlm_LongRunHighGrayLevelEmphasis             | 25,9514 | 5,56E-23 | 1,67E-22 | 1 |
| wavelet-HHL_gldm_GrayLevelVariance                         | 25,922  | 5,58E-23 | 1,67E-22 | 1 |
| log-sigma-5-0-mm-3D_glrlm_ShortRunEmphasis                 | 25,8092 | 6,74E-23 | 2,01E-22 | 1 |
| wavelet-HHL_firstorder_Variance                            | 25,8054 | 6,79E-23 | 2,02E-22 | 1 |
| wavelet-LLH_glcm_SumSquares                                | 25,7781 | 7,1E-23  | 2,1E-22  | 1 |
| log-sigma-4-0-mm-3D_glcm_Contrast                          | 25,6668 | 8,5E-23  | 2,51E-22 | 1 |
| wavelet-HHL_glcm_ClusterTendency                           | 25,6644 | 8,61E-23 | 2,54E-22 | 1 |
| log-sigma-3-0-mm-3D_firstorder_10Percentile                | 25,6531 | 8,89E-23 | 2,62E-22 | 3 |
| wavelet-LLH_glcm_JointAverage                              | 25,6379 | 8,97E-23 | 2,63E-22 | 1 |
| wavelet-HHL_glszm_GrayLevelVariance                        | 25,6411 | 9,08E-23 | 2,66E-22 | 1 |
| wavelet-HHL_glcm_SumSquares                                | 25,3915 | 1,37E-22 | 3,99E-22 | 1 |
| log-sigma-5-0-mm-3D_glcm_InverseVariance                   | 25,359  | 1,47E-22 | 4,29E-22 | 3 |
| log-sigma-3-0-mm-3D_glrlm_LongRunEmphasis                  | 25,3235 | 1,66E-22 | 4,82E-22 | 3 |
| log-sigma-5-0-mm-3D_glrlm_RunEntropy                       | 25,2512 | 1,78E-22 | 5,15E-22 | 1 |
| wavelet-LLL_firstorder_Maximum                             | 25,219  | 1,89E-22 | 5,46E-22 | 1 |
| wavelet-LLL_glrlm_LongRunEmphasis                          | 25,214  | 1,9E-22  | 5,48E-22 | 3 |
| wavelet-LLL_glcm_JointEntropy                              | 25,1874 | 1,95E-22 | 5,6E-22  | 1 |
| log-sigma-3-0-mm-3D_glcm_ClusterTendency                   | 25,1553 | 2,01E-22 | 5,76E-22 | 1 |
| wavelet-LLH_glcm_ClusterTendency                           | 25,0699 | 2,36E-22 | 6,75E-22 | 1 |
| wavelet-HHL_glcm_Contrast                                  | 25,0027 | 2,64E-22 | 7,54E-22 | 1 |
| wavelet-HHH_glszm_ZonePercentage                           | 24,9536 | 2,9E-22  | 8,24E-22 | 1 |
| wavelet-LHL_glrlm_GrayLevelVariance                        | 24,9356 | 2,97E-22 | 8,44E-22 | 1 |
| wavelet-LHL_gldm_GrayLevelVariance                         | 24,9024 | 3,15E-22 | 8,9E-22  | 1 |
| wavelet-LHL_firstorder_Variance                            | 24,8882 | 3,22E-22 | 9,1E-22  | 1 |
| original_glszm_ZoneEntropy                                 | 24,8639 | 3,37E-22 | 9,5E-22  | 1 |
| wavelet-HLH_glrlm_GrayLevelVariance                        | 24,7791 | 3,88E-22 | 1,09E-21 | 1 |
| wavelet-LHL_glcm_Contrast                                  | 24,7772 | 3,9E-22  | 1,09E-21 | 1 |
| wavelet-LHH_glszm_ZonePercentage                           | 24,7614 | 4E-22    | 1,12E-21 | 1 |
| wavelet-LLL_glcm_Imc1                                      | 24,7551 | 4,08E-22 | 1,14E-21 | 3 |
| wavelet-LLL_gldm_DependenceEntropy                         | 24,6546 | 4,83E-22 | 1,34E-21 | 1 |
| original_glcm_DifferenceVariance                           | 24,5851 | 5,41E-22 | 1,5E-21  | 1 |
| log-sigma-3-0-mm-3D_gldm_LargeDependenceEmphasis           | 24,6264 | 5,5E-22  | 1,52E-21 | 3 |
| wavelet-LLL_glrlm_RunVariance                              | 24,5088 | 6,35E-22 | 1,75E-21 | 3 |
| wavelet-LHL_glszm_GrayLevelVariance                        | 24,4248 | 7,22E-22 | 1,99E-21 | 1 |
| log-sigma-3-0-mm-3D_glcm_MaximumProbability                | 24,3555 | 8,14E-22 | 2,24E-21 | 3 |
| log-sigma-5-0-mm-3D_firstorder_RobustMeanAbsoluteDeviation | 24,3336 | 8,35E-22 | 2,29E-21 | 1 |
| wavelet-LHL_firstorder_Maximum                             | 24,2001 | 1,08E-21 | 2,96E-21 | 1 |
| log-sigma-3-0-mm-3D_firstorder_Maximum                     | 24,1809 | 1,1E-21  | 3E-21    | 1 |
| wavelet-HLH_gldm_GrayLevelVariance                         | 24,0449 | 1,38E-21 | 3,74E-21 | 1 |
| wavelet-HLH_firstorder_Variance                            | 24,0295 | 1,41E-21 | 3,83E-21 | 1 |
| log-sigma-4-0-mm-3D_glszm_SizeZoneNonUniformityNormalized  | 23,9638 | 1,58E-21 | 4,27E-21 | 1 |
| original_glcm_SumSquares                                   | 23,9631 | 1,6E-21  | 4,32E-21 | 1 |
| wavelet-LLL_glcm_Autocorrelation                           | 23,9605 | 1,66E-21 | 4,46E-21 | 1 |
| log-sigma-3-0-mm-3D_gldm_DependenceVariance                | 23,9932 | 1,67E-21 | 4,48E-21 | 3 |
| log-sigma-3-0-mm-3D_glcm_JointEnergy                       | 23,9243 | 1,67E-21 | 4,48E-21 | 3 |
| wavelet-LHH_glcm_InverseVariance                           | 23,905  | 1,74E-21 | 4,66E-21 | 3 |
| original_gldm_DependenceEntropy                            | 23,8776 | 1,85E-21 | 4,92E-21 | 1 |

|                                                            |         |          |          |   |
|------------------------------------------------------------|---------|----------|----------|---|
| wavelet-LLH_glcmm_Contrast                                 | 23,8509 | 1,91E-21 | 5,09E-21 | 1 |
| log-sigma-5-0-mm-3D_glrIm_GrayLevelNonUniformityNormalized | 23,6926 | 2,56E-21 | 6,8E-21  | 3 |
| wavelet-LHL_firstorder_Range                               | 23,6864 | 2,62E-21 | 6,93E-21 | 1 |
| log-sigma-3-0-mm-3D_glszm_GrayLevelVariance                | 23,628  | 2,94E-21 | 7,76E-21 | 1 |
| wavelet-HHH_glszm_GrayLevelNonUniformityNormalized         | 23,5956 | 2,99E-21 | 7,87E-21 | 3 |
| log-sigma-3-0-mm-3D_glrIm_RunVariance                      | 23,5134 | 3,74E-21 | 9,83E-21 | 3 |
| wavelet-LLL_glcmm_DifferenceVariance                       | 23,4085 | 4,14E-21 | 1,09E-20 | 1 |
| wavelet-HLH_gldm_DependenceNonUniformityNormalized         | 23,3437 | 4,73E-21 | 1,24E-20 | 1 |
| original_firstorder_Maximum                                | 23,2459 | 5,63E-21 | 1,47E-20 | 1 |
| wavelet-LHL_glcmm_DifferenceVariance                       | 23,1957 | 6,09E-21 | 1,59E-20 | 1 |
| log-sigma-5-0-mm-3D_firstorder_InterquartileRange          | 23,1575 | 6,45E-21 | 1,68E-20 | 1 |
| wavelet-HHL_glcmm_Imc2                                     | 22,9621 | 9,12E-21 | 2,37E-20 | 1 |
| log-sigma-2-0-mm-3D_glrIm_LongRunEmphasis                  | 22,9477 | 9,53E-21 | 2,47E-20 | 3 |
| wavelet-HHL_firstorder_Range                               | 22,9425 | 9,64E-21 | 2,49E-20 | 1 |
| wavelet-LHL_glcmm_SumSquares                               | 22,8018 | 1,21E-20 | 3,1E-20  | 1 |
| wavelet-LHH_glszm_ZoneEntropy                              | 22,7766 | 1,26E-20 | 3,25E-20 | 1 |
| wavelet-LLH_glszm_GrayLevelNonUniformityNormalized         | 22,7175 | 1,39E-20 | 3,57E-20 | 3 |
| log-sigma-5-0-mm-3D_firstorder_Uniformity                  | 22,7201 | 1,4E-20  | 3,57E-20 | 3 |
| original_firstorder_Range                                  | 22,6908 | 1,51E-20 | 3,86E-20 | 1 |
| log-sigma-4-0-mm-3D_gldm_DependenceEntropy                 | 22,648  | 1,59E-20 | 4,05E-20 | 1 |
| wavelet-LHL_glszm_ZoneEntropy                              | 22,6405 | 1,63E-20 | 4,15E-20 | 1 |
| wavelet-LLL_firstorder_Range                               | 22,5283 | 2,01E-20 | 5,1E-20  | 1 |
| original_firstorder_Variance                               | 22,4778 | 2,15E-20 | 5,44E-20 | 1 |
| original_gldm_GrayLevelVariance                            | 22,4472 | 2,27E-20 | 5,73E-20 | 1 |
| wavelet-LLH_glszm_GrayLevelVariance                        | 22,4383 | 2,29E-20 | 5,76E-20 | 1 |
| original_glrIm_GrayLevelVariance                           | 22,2869 | 3,02E-20 | 7,59E-20 | 1 |
| log-sigma-2-0-mm-3D_glcmm_MaximumProbability               | 22,2741 | 3,05E-20 | 7,65E-20 | 3 |
| wavelet-LLH_firstorder_Range                               | 22,2664 | 3,1E-20  | 7,76E-20 | 1 |
| log-sigma-5-0-mm-3D_firstorder_10Percentile                | 22,2046 | 3,5E-20  | 8,72E-20 | 3 |
| log-sigma-4-0-mm-3D_gldm_LargeDependenceEmphasis           | 22,1612 | 3,98E-20 | 9,9E-20  | 3 |
| log-sigma-2-0-mm-3D_gldm_LargeDependenceEmphasis           | 21,9807 | 5,32E-20 | 1,32E-19 | 3 |
| log-sigma-4-0-mm-3D_firstorder_Range                       | 21,941  | 5,69E-20 | 1,41E-19 | 1 |
| log-sigma-2-0-mm-3D_gldm_DependenceVariance                | 21,9011 | 6,26E-20 | 1,55E-19 | 3 |
| log-sigma-4-0-mm-3D_glrIm_LongRunEmphasis                  | 21,8526 | 6,86E-20 | 1,69E-19 | 3 |
| original_glcmm_ClusterTendency                             | 21,8285 | 6,88E-20 | 1,7E-19  | 1 |
| wavelet-HLH_glcmm_ClusterTendency                          | 21,7552 | 7,79E-20 | 1,91E-19 | 1 |
| wavelet-HHL_glcmm_DifferenceVariance                       | 21,7488 | 7,88E-20 | 1,93E-19 | 1 |
| log-sigma-3-0-mm-3D_gldm_DependenceEntropy                 | 21,7481 | 7,9E-20  | 1,93E-19 | 1 |
| original_glrIm_LongRunEmphasis                             | 21,7353 | 8,1E-20  | 1,98E-19 | 3 |
| log-sigma-4-0-mm-3D_firstorder_10Percentile                | 21,5747 | 1,08E-19 | 2,63E-19 | 3 |
| wavelet-HHH_glrIm_GrayLevelVariance                        | 21,4855 | 1,26E-19 | 3,06E-19 | 1 |
| wavelet-LLL_glcmm_SumSquares                               | 21,4548 | 1,35E-19 | 3,26E-19 | 1 |
| log-sigma-4-0-mm-3D_glszm_GrayLevelNonUniformityNormalized | 21,4191 | 1,46E-19 | 3,52E-19 | 3 |
| wavelet-HHL_glrIm_LongRunEmphasis                          | 21,3907 | 1,47E-19 | 3,54E-19 | 3 |
| log-sigma-4-0-mm-3D_glrIm_RunVariance                      | 21,3931 | 1,57E-19 | 3,78E-19 | 3 |
| wavelet-LHL_glrIm_LongRunEmphasis                          | 21,1083 | 2,45E-19 | 5,9E-19  | 3 |
| log-sigma-2-0-mm-3D_glcmm_Imc2                             | 21,0988 | 2,57E-19 | 6,16E-19 | 1 |

|                                                            |         |          |          |   |
|------------------------------------------------------------|---------|----------|----------|---|
| wavelet-HLL_glrIm_LongRunEmphasis                          | 21,066  | 2,7E-19  | 6,47E-19 | 3 |
| log-sigma-5-0-mm-3D_gldm_DependenceNonUniformityNormalized | 20,9748 | 3,21E-19 | 7,66E-19 | 1 |
| log-sigma-5-0-mm-3D_gldm_LargeDependenceEmphasis           | 20,8261 | 4,33E-19 | 1,03E-18 | 3 |
| wavelet-HHL_glcm_JointAverage                              | 20,7987 | 4,46E-19 | 1,06E-18 | 1 |
| log-sigma-2-0-mm-3D_glrIm_RunVariance                      | 20,7194 | 5,21E-19 | 1,24E-18 | 3 |
| wavelet-HHH_firstorder_Variance                            | 20,6465 | 5,77E-19 | 1,37E-18 | 1 |
| wavelet-LLH_glszm_SizeZoneNonUniformityNormalized          | 20,624  | 5,91E-19 | 1,4E-18  | 1 |
| wavelet-LHL_glcm_Imc2                                      | 20,5516 | 6,88E-19 | 1,62E-18 | 1 |
| wavelet-HLH_glcm_SumSquares                                | 20,5423 | 7,03E-19 | 1,65E-18 | 1 |
| wavelet-HHL_firstorder_Minimum                             | 20,4905 | 7,83E-19 | 1,84E-18 | 3 |
| log-sigma-5-0-mm-3D_glszm_SmallAreaEmphasis                | 20,4939 | 8,33E-19 | 1,95E-18 | 1 |
| wavelet-LHL_glcm_ClusterTendency                           | 20,4111 | 8,9E-19  | 2,08E-18 | 1 |
| wavelet-HHL_glrIm_RunVariance                              | 20,3914 | 9,05E-19 | 2,11E-18 | 3 |
| log-sigma-4-0-mm-3D_glcm_DifferenceVariance                | 20,3014 | 1,08E-18 | 2,52E-18 | 1 |
| log-sigma-4-0-mm-3D_glcm_MaximumProbability                | 20,2987 | 1,1E-18  | 2,56E-18 | 3 |
| log-sigma-5-0-mm-3D_glrIm_LongRunEmphasis                  | 20,1647 | 1,45E-18 | 3,37E-18 | 3 |
| log-sigma-5-0-mm-3D_glrIm_RunVariance                      | 20,0613 | 1,77E-18 | 4,1E-18  | 3 |
| log-sigma-4-0-mm-3D_firstorder_Variance                    | 20,0327 | 1,78E-18 | 4,1E-18  | 1 |
| log-sigma-4-0-mm-3D_gldm_GrayLevelVariance                 | 20,0114 | 1,85E-18 | 4,26E-18 | 1 |
| original_glrIm_RunVariance                                 | 20,0125 | 1,87E-18 | 4,3E-18  | 3 |
| wavelet-LLL_gldm_DependenceVariance                        | 20,0126 | 1,92E-18 | 4,41E-18 | 3 |
| log-sigma-4-0-mm-3D_glcm_SumSquares                        | 19,9748 | 1,98E-18 | 4,53E-18 | 1 |
| wavelet-LLL_glcm_ClusterTendency                           | 19,8935 | 2,33E-18 | 5,34E-18 | 1 |
| wavelet-LLL_firstorder_Variance                            | 19,8849 | 2,36E-18 | 5,37E-18 | 1 |
| wavelet-LLL_gldm_GrayLevelVariance                         | 19,8859 | 2,35E-18 | 5,37E-18 | 1 |
| log-sigma-4-0-mm-3D_glrIm_GrayLevelVariance                | 19,8616 | 2,44E-18 | 5,55E-18 | 1 |
| wavelet-HLH_glcm_Imc2                                      | 19,8585 | 2,47E-18 | 5,6E-18  | 1 |
| wavelet-LHL_glrIm_RunVariance                              | 19,8227 | 2,59E-18 | 5,87E-18 | 3 |
| log-sigma-4-0-mm-3D_glcm_JointEnergy                       | 19,8256 | 2,61E-18 | 5,89E-18 | 3 |
| wavelet-LLL_glrIm_GrayLevelVariance                        | 19,7986 | 2,77E-18 | 6,24E-18 | 1 |
| wavelet-LLH_glszm_ZoneEntropy                              | 19,78   | 2,86E-18 | 6,43E-18 | 1 |
| wavelet-HLL_firstorder_Range                               | 19,7757 | 2,92E-18 | 6,55E-18 | 1 |
| wavelet-HHH_gldm_GrayLevelVariance                         | 19,7291 | 3,13E-18 | 7E-18    | 1 |
| wavelet-LLH_glrIm_LongRunEmphasis                          | 19,6174 | 3,97E-18 | 8,89E-18 | 3 |
| wavelet-LLH_gldm_LargeDependenceEmphasis                   | 19,6095 | 4,05E-18 | 9,04E-18 | 3 |
| wavelet-LLH_gldm_DependenceVariance                        | 19,6052 | 4,09E-18 | 9,1E-18  | 3 |
| wavelet-HLL_glcm_Imc2                                      | 19,5579 | 4,33E-18 | 9,62E-18 | 1 |
| wavelet-HHH_glcm_ClusterTendency                           | 19,5419 | 4,43E-18 | 9,82E-18 | 1 |
| log-sigma-3-0-mm-3D_firstorder_90Percentile                | 19,3751 | 6,04E-18 | 1,34E-17 | 1 |
| wavelet-LLL_gldm_LargeDependenceEmphasis                   | 19,3006 | 7,12E-18 | 1,57E-17 | 3 |
| wavelet-HHH_glcm_SumSquares                                | 19,271  | 7,34E-18 | 1,62E-17 | 1 |
| log-sigma-5-0-mm-3D_glcm_Contrast                          | 19,2611 | 7,42E-18 | 1,63E-17 | 1 |
| original_glszm_GrayLevelVariance                           | 19,2394 | 7,89E-18 | 1,73E-17 | 1 |
| log-sigma-4-0-mm-3D_glcm_ClusterTendency                   | 19,1905 | 8,51E-18 | 1,87E-17 | 1 |
| wavelet-HLL_glcm_JointAverage                              | 19,1835 | 8,82E-18 | 1,93E-17 | 1 |
| log-sigma-5-0-mm-3D_firstorder_Minimum                     | 19,1607 | 9,23E-18 | 2,01E-17 | 3 |
| log-sigma-5-0-mm-3D_glszm_SizeZoneNonUniformityNormalized  | 19,1208 | 9,7E-18  | 2,11E-17 | 1 |

|                                                       |         |          |          |   |
|-------------------------------------------------------|---------|----------|----------|---|
| wavelet-HHH_glcmm_Contrast                            | 18,9847 | 1,26E-17 | 2,73E-17 | 1 |
| wavelet-HHL_glcmm_MaximumProbability                  | 18,9724 | 1,32E-17 | 2,86E-17 | 3 |
| wavelet-HLH_glcmm_Contrast                            | 18,8571 | 1,61E-17 | 3,48E-17 | 1 |
| wavelet-HLL_firstorder_Minimum                        | 18,7352 | 2,05E-17 | 4,43E-17 | 3 |
| original_gldm_DependenceVariance                      | 18,6941 | 2,24E-17 | 4,83E-17 | 3 |
| log-sigma-3-0-mm-3D_glcmm_JointAverage                | 18,6054 | 2,65E-17 | 5,71E-17 | 1 |
| wavelet-LLL_glszm_GrayLevelVariance                   | 18,5688 | 2,77E-17 | 5,96E-17 | 1 |
| log-sigma-4-0-mm-3D_gldm_DependenceVariance           | 18,532  | 3,11E-17 | 6,68E-17 | 3 |
| wavelet-HLL_glrmm_RunVariance                         | 18,5018 | 3,14E-17 | 6,73E-17 | 3 |
| wavelet-HHL_gldm_LargeDependenceEmphasis              | 18,2787 | 4,71E-17 | 1,01E-16 | 3 |
| wavelet-LLH_glcmm_MaximumProbability                  | 18,2763 | 4,85E-17 | 1,04E-16 | 3 |
| wavelet-HHL_gldm_DependenceVariance                   | 18,0974 | 6,71E-17 | 1,43E-16 | 3 |
| wavelet-LLH_glrmm_RunVariance                         | 17,982  | 8,66E-17 | 1,84E-16 | 3 |
| log-sigma-4-0-mm-3D_firstorder_Minimum                | 17,8071 | 1,21E-16 | 2,57E-16 | 3 |
| log-sigma-2-0-mm-3D_glcmm_JointAverage                | 17,7072 | 1,45E-16 | 3,08E-16 | 1 |
| original_glcmm_Imc2                                   | 17,693  | 1,48E-16 | 3,12E-16 | 1 |
| log-sigma-5-0-mm-3D_firstorder_Range                  | 17,685  | 1,51E-16 | 3,19E-16 | 1 |
| wavelet-HLL_gldm_LargeDependenceEmphasis              | 17,6661 | 1,54E-16 | 3,25E-16 | 3 |
| original_gldm_LargeDependenceEmphasis                 | 17,6416 | 1,63E-16 | 3,42E-16 | 3 |
| wavelet-HLL_gldm_DependenceVariance                   | 17,6409 | 1,64E-16 | 3,43E-16 | 3 |
| wavelet-HHL_glszm_SmallAreaEmphasis                   | 17,6201 | 1,67E-16 | 3,5E-16  | 1 |
| log-sigma-5-0-mm-3D_gldm_DependenceVariance           | 17,6219 | 1,77E-16 | 3,7E-16  | 3 |
| log-sigma-2-0-mm-3D_glcmm_JointEnergy                 | 17,5741 | 1,82E-16 | 3,79E-16 | 3 |
| log-sigma-4-0-mm-3D_glszm_SmallAreaEmphasis           | 17,5001 | 2,16E-16 | 4,49E-16 | 1 |
| wavelet-HLH_glcmm_DifferenceVariance                  | 17,4903 | 2,16E-16 | 4,49E-16 | 1 |
| wavelet-HLL_glszm_GrayLevelVariance                   | 17,4111 | 2,5E-16  | 5,2E-16  | 1 |
| wavelet-HLL_glcmm_MaximumProbability                  | 17,3022 | 3,11E-16 | 6,43E-16 | 3 |
| wavelet-HLL_glrmm_GrayLevelVariance                   | 17,2922 | 3,14E-16 | 6,5E-16  | 1 |
| log-sigma-3-0-mm-3D_firstorder_Minimum                | 17,3121 | 3,17E-16 | 6,53E-16 | 3 |
| log-sigma-4-0-mm-3D_glcmm_JointAverage                | 17,2459 | 3,54E-16 | 7,29E-16 | 1 |
| wavelet-HLL_gldm_GrayLevelVariance                    | 17,2223 | 3,6E-16  | 7,4E-16  | 1 |
| wavelet-HLL_firstorder_Variance                       | 17,2171 | 3,64E-16 | 7,46E-16 | 1 |
| wavelet-HHL_glszm_SizeZoneNonUniformityNormalized     | 16,9792 | 5,78E-16 | 1,18E-15 | 1 |
| wavelet-LLH_glcmm_JointEnergy                         | 16,9817 | 5,77E-16 | 1,18E-15 | 3 |
| wavelet-HHL_firstorder_Maximum                        | 16,9846 | 5,87E-16 | 1,2E-15  | 1 |
| wavelet-LLH_glszm_SmallAreaEmphasis                   | 16,9693 | 5,92E-16 | 1,2E-15  | 1 |
| log-sigma-3-0-mm-3D_glcmm_Imc2                        | 16,8859 | 7E-16    | 1,42E-15 | 1 |
| wavelet-LLH_glcmm_DifferenceVariance                  | 16,859  | 7,32E-16 | 1,48E-15 | 1 |
| log-sigma-5-0-mm-3D_gldm_DependenceEntropy            | 16,8093 | 8,1E-16  | 1,64E-15 | 1 |
| original_glcmm_MaximumProbability                     | 16,7977 | 8,22E-16 | 1,66E-15 | 3 |
| log-sigma-5-0-mm-3D_glcmm_JointEnergy                 | 16,7851 | 8,46E-16 | 1,71E-15 | 3 |
| wavelet-HHH_glcmm_DifferenceVariance                  | 16,7457 | 9,14E-16 | 1,84E-15 | 1 |
| wavelet-LHL_gldm_LargeDependenceEmphasis              | 16,7239 | 9,42E-16 | 1,9E-15  | 3 |
| wavelet-LHL_gldm_DependenceVariance                   | 16,7089 | 9,79E-16 | 1,97E-15 | 3 |
| wavelet-HLH_firstorder_Range                          | 16,6999 | 1E-15    | 2,01E-15 | 1 |
| wavelet-LHL_glcmm_Imc1                                | 16,6789 | 1,04E-15 | 2,08E-15 | 3 |
| wavelet-LLH_gldm_SmallDependenceHighGrayLevelEmphasis | 16,6329 | 1,14E-15 | 2,27E-15 | 1 |

|                                                               |         |          |          |   |
|---------------------------------------------------------------|---------|----------|----------|---|
| wavelet-LLL_glcm_MaximumProbability                           | 16,3554 | 1,97E-15 | 3,92E-15 | 3 |
| log-sigma-5-0-mm-3D_glcm_SumSquares                           | 16,2442 | 2,45E-15 | 4,87E-15 | 1 |
| wavelet-LHH_glcm_Imc2                                         | 16,2231 | 2,55E-15 | 5,07E-15 | 1 |
| log-sigma-2-0-mm-3D_firstorder_Minimum                        | 16,2089 | 2,67E-15 | 5,3E-15  | 3 |
| log-sigma-5-0-mm-3D_gldm_GrayLevelVariance                    | 16,161  | 2,89E-15 | 5,71E-15 | 1 |
| log-sigma-5-0-mm-3D_firstorder_Variance                       | 16,1249 | 3,1E-15  | 6,12E-15 | 1 |
| wavelet-LHL_glcm_JointAverage                                 | 16,116  | 3,18E-15 | 6,27E-15 | 1 |
| log-sigma-5-0-mm-3D_glrIm_GrayLevelVariance                   | 15,9714 | 4,2E-15  | 8,27E-15 | 1 |
| log-sigma-2-0-mm-3D_gldm_SmallDependenceHighGrayLevelEmphasis | 15,9147 | 4,79E-15 | 9,41E-15 | 1 |
| log-sigma-5-0-mm-3D_glcm_ClusterTendency                      | 15,816  | 5,71E-15 | 1,12E-14 | 1 |
| wavelet-HLL_glcm_ClusterTendency                              | 15,8057 | 5,77E-15 | 1,13E-14 | 1 |
| log-sigma-5-0-mm-3D_glszm_GrayLevelNonUniformityNormalized    | 15,7966 | 6,03E-15 | 1,18E-14 | 3 |
| wavelet-LHL_firstorder_Minimum                                | 15,6871 | 7,43E-15 | 1,45E-14 | 3 |
| log-sigma-5-0-mm-3D_glcm_JointAverage                         | 15,552  | 9,81E-15 | 1,91E-14 | 1 |
| wavelet-HHL_glcm_JointEnergy                                  | 15,4856 | 1,12E-14 | 2,17E-14 | 3 |
| wavelet-LHH_firstorder_Maximum                                | 15,456  | 1,17E-14 | 2,26E-14 | 1 |
| wavelet-HHL_glszm_LowGrayLevelZoneEmphasis                    | 15,4123 | 1,33E-14 | 2,59E-14 | 3 |
| wavelet-HHH_glszm_LowGrayLevelZoneEmphasis                    | 15,3706 | 1,38E-14 | 2,67E-14 | 3 |
| wavelet-HLL_glcm_SumSquares                                   | 15,2537 | 1,73E-14 | 3,35E-14 | 1 |
| wavelet-LHH_firstorder_Range                                  | 15,2268 | 1,84E-14 | 3,55E-14 | 1 |
| wavelet-LHL_glcm_MaximumProbability                           | 15,2062 | 1,96E-14 | 3,78E-14 | 3 |
| log-sigma-5-0-mm-3D_glcm_MaximumProbability                   | 15,0859 | 2,46E-14 | 4,73E-14 | 3 |
| wavelet-HLL_glcm_Imc1                                         | 15,076  | 2,49E-14 | 4,78E-14 | 3 |
| log-sigma-5-0-mm-3D_glcm_DifferenceVariance                   | 14,9459 | 3,22E-14 | 6,17E-14 | 1 |
| original_glcm_Imc1                                            | 14,8783 | 3,71E-14 | 7,1E-14  | 3 |
| wavelet-LLH_gldm_DependenceEntropy                            | 14,7403 | 4,9E-14  | 9,34E-14 | 1 |
| wavelet-LLH_glrIm_ShortRunHighGrayLevelEmphasis               | 14,6679 | 5,65E-14 | 1,08E-13 | 1 |
| wavelet-LLH_glcm_Imc2                                         | 14,5875 | 6,79E-14 | 1,29E-13 | 1 |
| log-sigma-4-0-mm-3D_glszm_GrayLevelVariance                   | 14,4472 | 8,96E-14 | 1,7E-13  | 1 |
| wavelet-HLH_firstorder_Maximum                                | 14,4368 | 9,06E-14 | 1,72E-13 | 1 |
| wavelet-LHH_glcm_ClusterProminence                            | 14,4197 | 9,39E-14 | 1,78E-13 | 1 |
| wavelet-LLL_glcm_Imc2                                         | 14,2734 | 1,28E-13 | 2,41E-13 | 1 |
| wavelet-HLH_glcm_JointAverage                                 | 14,2266 | 1,4E-13  | 2,63E-13 | 1 |
| original_glcm_JointEnergy                                     | 14,1363 | 1,66E-13 | 3,13E-13 | 3 |
| wavelet-HLL_firstorder_Maximum                                | 14,0761 | 1,9E-13  | 3,57E-13 | 1 |
| wavelet-HLL_glcm_Contrast                                     | 13,9574 | 2,39E-13 | 4,48E-13 | 1 |
| wavelet-HLL_glcm_JointEnergy                                  | 13,8185 | 3,19E-13 | 5,97E-13 | 3 |
| wavelet-LLH_gldm_HighGrayLevelEmphasis                        | 13,8162 | 3,2E-13  | 5,98E-13 | 1 |
| wavelet-HLH_firstorder_Minimum                                | 13,7879 | 3,42E-13 | 6,38E-13 | 3 |
| wavelet-LLH_glrIm_HighGrayLevelRunEmphasis                    | 13,7542 | 3,63E-13 | 6,77E-13 | 1 |
| wavelet-LLL_glcm_JointEnergy                                  | 13,7121 | 3,97E-13 | 7,39E-13 | 3 |
| wavelet-LLH_glcm_Autocorrelation                              | 13,6975 | 4,08E-13 | 7,58E-13 | 1 |
| wavelet-LLH_firstorder_Maximum                                | 13,4738 | 6,47E-13 | 1,2E-12  | 1 |
| wavelet-HHH_glszm_GrayLevelVariance                           | 13,4109 | 7,38E-13 | 1,37E-12 | 1 |
| wavelet-HHH_glcm_Imc2                                         | 13,359  | 8,21E-13 | 1,52E-12 | 1 |
| wavelet-HLL_glcm_DifferenceVariance                           | 13,3113 | 9,04E-13 | 1,67E-12 | 1 |
| wavelet-LLH_glszm_SizeZoneNonUniformity                       | 13,2359 | 1,06E-12 | 1,95E-12 | 1 |

|                                                       |         |          |          |   |
|-------------------------------------------------------|---------|----------|----------|---|
| wavelet-HHL_gldm_SmallDependenceHighGrayLevelEmphasis | 13,0518 | 1,57E-12 | 2,88E-12 | 1 |
| wavelet-HLL_gldm_SmallDependenceHighGrayLevelEmphasis | 12,8913 | 2,19E-12 | 4,02E-12 | 1 |
| wavelet-HHL_glrlm_LongRunLowGrayLevelEmphasis         | 12,8877 | 2,26E-12 | 4,14E-12 | 3 |
| wavelet-HHL_glszm_SmallAreaLowGrayLevelEmphasis       | 12,8783 | 2,32E-12 | 4,24E-12 | 3 |
| wavelet-LLH_glszm_HighGrayLevelZoneEmphasis           | 12,7657 | 2,81E-12 | 5,14E-12 | 1 |
| wavelet-HLH_glszm_SizeZoneNonUniformity               | 12,4165 | 5,85E-12 | 1,07E-11 | 1 |
| wavelet-LLH_glszm_SmallAreaHighGrayLevelEmphasis      | 12,3844 | 6,25E-12 | 1,14E-11 | 1 |
| log-sigma-5-0-mm-3D_gldm_DependenceNonUniformity      | 12,2734 | 7,91E-12 | 1,44E-11 | 1 |
| log-sigma-4-0-mm-3D_firstorder_Maximum                | 12,2122 | 9,02E-12 | 1,64E-11 | 1 |
| wavelet-HHL_glrlm_LowGrayLevelRunEmphasis             | 12,2146 | 9,14E-12 | 1,66E-11 | 3 |
| wavelet-HHL_gldm_LowGrayLevelEmphasis                 | 12,0903 | 1,19E-11 | 2,15E-11 | 3 |
| log-sigma-3-0-mm-3D_glszm_LowGrayLevelZoneEmphasis    | 12,0183 | 1,45E-11 | 2,61E-11 | 3 |
| log-sigma-2-0-mm-3D_glcm_Idn                          | 11,9629 | 1,54E-11 | 2,77E-11 | 3 |
| wavelet-HLL_glszm_SizeZoneNonUniformity               | 11,8909 | 1,77E-11 | 3,19E-11 | 1 |
| log-sigma-2-0-mm-3D_glszm_LowGrayLevelZoneEmphasis    | 11,8183 | 2,12E-11 | 3,81E-11 | 3 |
| wavelet-HHH_glrlm_GrayLevelNonUniformity              | 11,7892 | 2,2E-11  | 3,95E-11 | 3 |
| log-sigma-3-0-mm-3D_glszm_GrayLevelNonUniformity      | 11,7685 | 2,3E-11  | 4,12E-11 | 1 |
| log-sigma-2-0-mm-3D_glszm_SizeZoneNonUniformity       | 11,7533 | 2,37E-11 | 4,25E-11 | 1 |
| log-sigma-3-0-mm-3D_glszm_SizeZoneNonUniformity       | 11,7043 | 2,63E-11 | 4,71E-11 | 1 |
| log-sigma-5-0-mm-3D_glrlm_GrayLevelNonUniformity      | 11,6934 | 2,7E-11  | 4,81E-11 | 3 |
| wavelet-LHH_gldm_SmallDependenceHighGrayLevelEmphasis | 11,6799 | 2,77E-11 | 4,93E-11 | 1 |
| wavelet-HHL_glrlm_ShortRunLowGrayLevelEmphasis        | 11,6261 | 3,17E-11 | 5,63E-11 | 3 |
| wavelet-HHL_glszm_SmallAreaHighGrayLevelEmphasis      | 11,5201 | 3,92E-11 | 6,96E-11 | 1 |
| log-sigma-4-0-mm-3D_glcm_Imc2                         | 11,5122 | 3,95E-11 | 6,99E-11 | 1 |
| original_glszm_SizeZoneNonUniformity                  | 11,459  | 4,44E-11 | 7,86E-11 | 1 |
| log-sigma-3-0-mm-3D_glcm_Idn                          | 11,4317 | 4,77E-11 | 8,43E-11 | 3 |
| wavelet-HLH_gldm_LargeDependenceLowGrayLevelEmphasis  | 11,3535 | 5,55E-11 | 9,79E-11 | 3 |
| wavelet-HHL_glcm_Imc1                                 | 11,3428 | 5,69E-11 | 1E-10    | 3 |
| wavelet-HHL_glrlm_GrayLevelNonUniformity              | 11,3092 | 6,12E-11 | 1,08E-10 | 3 |
| wavelet-HHH_gldm_LargeDependenceLowGrayLevelEmphasis  | 11,2958 | 6,29E-11 | 1,1E-10  | 3 |
| log-sigma-2-0-mm-3D_glrlm_LongRunLowGrayLevelEmphasis | 11,2969 | 6,33E-11 | 1,11E-10 | 3 |
| wavelet-HHL_glrlm_ShortRunHighGrayLevelEmphasis       | 11,2762 | 6,6E-11  | 1,16E-10 | 1 |
| log-sigma-4-0-mm-3D_glrlm_GrayLevelNonUniformity      | 11,22   | 7,41E-11 | 1,29E-10 | 3 |
| wavelet-LHH_glrlm_GrayLevelNonUniformity              | 11,1404 | 8,78E-11 | 1,53E-10 | 3 |
| wavelet-HHL_glszm_SizeZoneNonUniformity               | 11,1199 | 9,18E-11 | 1,6E-10  | 1 |
| log-sigma-4-0-mm-3D_glszm_GrayLevelNonUniformity      | 11,1078 | 9,42E-11 | 1,64E-10 | 1 |
| wavelet-LHH_firstorder_Minimum                        | 11,1072 | 9,43E-11 | 1,64E-10 | 3 |
| wavelet-LHH_glszm_SizeZoneNonUniformity               | 11,1025 | 9,52E-11 | 1,65E-10 | 1 |
| wavelet-HLH_glrlm_LongRunLowGrayLevelEmphasis         | 11,1021 | 9,59E-11 | 1,66E-10 | 3 |
| original_firstorder_TotalEnergy                       | 9,72095 | 9,84E-11 | 1,7E-10  | 1 |
| original_firstorder_Energy                            | 9,72095 | 9,84E-11 | 1,7E-10  | 1 |
| wavelet-HHL_glszm_HighGrayLevelZoneEmphasis           | 11,0649 | 1,04E-10 | 1,79E-10 | 1 |
| wavelet-HHH_glrlm_LongRunLowGrayLevelEmphasis         | 11,0202 | 1,14E-10 | 1,95E-10 | 3 |
| wavelet-LLH_glcm_ClusterProminence                    | 10,9276 | 1,14E-10 | 1,95E-10 | 1 |
| log-sigma-4-0-mm-3D_gldm_DependenceNonUniformity      | 10,8897 | 1,51E-10 | 2,58E-10 | 1 |
| wavelet-HHH_glrlm_RunLengthNonUniformity              | 10,8764 | 1,55E-10 | 2,65E-10 | 1 |
| wavelet-HHL_glrlm_HighGrayLevelRunEmphasis            | 10,8046 | 1,82E-10 | 3,11E-10 | 1 |

|                                                          |         |          |          |   |
|----------------------------------------------------------|---------|----------|----------|---|
| wavelet-LHH_glcml_Icn                                    | 10,7836 | 1,9E-10  | 3,24E-10 | 3 |
| wavelet-HHL_gldm_HighGrayLevelEmphasis                   | 10,7834 | 1,9E-10  | 3,24E-10 | 1 |
| wavelet-HLL_glszm_SmallAreaHighGrayLevelEmphasis         | 10,7811 | 1,92E-10 | 3,26E-10 | 1 |
| wavelet-LLH_glszm_GrayLevelNonUniformity                 | 10,7725 | 1,94E-10 | 3,29E-10 | 1 |
| wavelet-HHH_gldm_GrayLevelNonUniformity                  | 10,7698 | 1,95E-10 | 3,31E-10 | 3 |
| wavelet-HHL_gldm_GrayLevelNonUniformity                  | 10,7453 | 2,06E-10 | 3,48E-10 | 3 |
| log-sigma-2-0-mm-3D_glrIm_LowGrayLevelRunEmphasis        | 10,7409 | 2,09E-10 | 3,53E-10 | 3 |
| wavelet-LHL_glcml_JointEnergy                            | 10,7384 | 2,12E-10 | 3,59E-10 | 3 |
| wavelet-LLL_firstorder_TotalEnergy                       | 9,34178 | 2,84E-10 | 4,79E-10 | 1 |
| wavelet-LLL_firstorder_Energy                            | 9,34178 | 2,84E-10 | 4,79E-10 | 1 |
| wavelet-HLH_gldm_DependenceNonUniformity                 | 10,5516 | 3,12E-10 | 5,25E-10 | 1 |
| wavelet-LHL_glszm_SizeZoneNonUniformity                  | 10,5503 | 3,13E-10 | 5,26E-10 | 1 |
| wavelet-HLL_gldm_DependenceNonUniformity                 | 10,5373 | 3,22E-10 | 5,4E-10  | 1 |
| wavelet-HLH_glrIm_GrayLevelNonUniformity                 | 10,5308 | 3,27E-10 | 5,47E-10 | 3 |
| log-sigma-2-0-mm-3D_glrIm_ShortRunHighGrayLevelEmphasis  | 10,5328 | 3,29E-10 | 5,5E-10  | 1 |
| log-sigma-2-0-mm-3D_glszm_SmallAreaHighGrayLevelEmphasis | 10,4951 | 3,58E-10 | 5,97E-10 | 1 |
| wavelet-HLL_glrIm_GrayLevelNonUniformity                 | 10,4847 | 3,61E-10 | 6,02E-10 | 3 |
| log-sigma-2-0-mm-3D_gldm_LowGrayLevelEmphasis            | 10,4703 | 3,75E-10 | 6,23E-10 | 3 |
| wavelet-HLH_glrIm_LowGrayLevelRunEmphasis                | 10,3972 | 4,41E-10 | 7,32E-10 | 3 |
| wavelet-HLL_glrIm_ShortRunHighGrayLevelEmphasis          | 10,3857 | 4,51E-10 | 7,48E-10 | 1 |
| log-sigma-4-0-mm-3D_glrIm_LowGrayLevelRunEmphasis        | 10,3863 | 4,58E-10 | 7,59E-10 | 3 |
| log-sigma-3-0-mm-3D_glrIm_GrayLevelNonUniformity         | 10,3341 | 5,01E-10 | 8,28E-10 | 3 |
| wavelet-HLH_glszm_LowGrayLevelZoneEmphasis               | 10,3365 | 5,02E-10 | 8,29E-10 | 3 |
| wavelet-HLL_gldm_GrayLevelNonUniformity                  | 10,245  | 5,05E-10 | 8,33E-10 | 3 |
| wavelet-HLH_gldm_LowGrayLevelEmphasis                    | 10,281  | 5,67E-10 | 9,34E-10 | 3 |
| log-sigma-4-0-mm-3D_glrIm_LongRunLowGrayLevelEmphasis    | 10,2864 | 5,69E-10 | 9,36E-10 | 3 |
| log-sigma-3-0-mm-3D_gldm_DependenceNonUniformity         | 10,2649 | 5,82E-10 | 9,55E-10 | 1 |
| log-sigma-3-0-mm-3D_glrIm_LongRunLowGrayLevelEmphasis    | 10,1916 | 6,97E-10 | 1,14E-09 | 3 |
| log-sigma-2-0-mm-3D_glszm_GrayLevelNonUniformity         | 10,1732 | 7,11E-10 | 1,16E-09 | 1 |
| wavelet-LHL_gldm_SmallDependenceHighGrayLevelEmphasis    | 10,1201 | 8E-10    | 1,31E-09 | 1 |
| wavelet-HHL_gldm_DependenceNonUniformity                 | 10,1147 | 8,07E-10 | 1,32E-09 | 1 |
| wavelet-HHH_glcml_InverseVariance                        | 10,1042 | 8,24E-10 | 1,34E-09 | 3 |
| wavelet-HLH_glszm_SmallAreaLowGrayLevelEmphasis          | 10,0851 | 8,65E-10 | 1,41E-09 | 3 |
| log-sigma-4-0-mm-3D_glrIm_ShortRunLowGrayLevelEmphasis   | 10,0851 | 8,8E-10  | 1,43E-09 | 3 |
| log-sigma-2-0-mm-3D_glrIm_ShortRunLowGrayLevelEmphasis   | 10,0701 | 8,95E-10 | 1,45E-09 | 3 |
| wavelet-HLL_gldm_HighGrayLevelEmphasis                   | 9,99336 | 1,06E-09 | 1,72E-09 | 1 |
| wavelet-HLL_glrIm_HighGrayLevelRunEmphasis               | 9,98888 | 1,07E-09 | 1,73E-09 | 1 |
| wavelet-HLL_glszm_HighGrayLevelZoneEmphasis              | 9,92944 | 1,22E-09 | 1,97E-09 | 1 |
| log-sigma-4-0-mm-3D_glszm_SizeZoneNonUniformity          | 9,90699 | 1,27E-09 | 2,05E-09 | 1 |
| log-sigma-4-0-mm-3D_gldm_LowGrayLevelEmphasis            | 9,90956 | 1,29E-09 | 2,08E-09 | 3 |
| log-sigma-2-0-mm-3D_glrIm_GrayLevelNonUniformity         | 9,89708 | 1,3E-09  | 2,09E-09 | 3 |
| wavelet-LLL_firstorder_10Percentile                      | 9,88772 | 1,32E-09 | 2,12E-09 | 2 |
| wavelet-LLH_glrIm_LongRunLowGrayLevelEmphasis            | 9,87318 | 1,37E-09 | 2,2E-09  | 3 |
| original_gldm_DependenceNonUniformity                    | 9,86757 | 1,39E-09 | 2,22E-09 | 1 |
| wavelet-LHH_glcml_JointAverage                           | 9,86593 | 1,39E-09 | 2,22E-09 | 1 |
| log-sigma-5-0-mm-3D_glrIm_ShortRunLowGrayLevelEmphasis   | 9,82341 | 1,55E-09 | 2,48E-09 | 3 |
| wavelet-LLL_glszm_SizeZoneNonUniformity                  | 9,78839 | 1,65E-09 | 2,63E-09 | 1 |

|                                                               |         |          |          |   |
|---------------------------------------------------------------|---------|----------|----------|---|
| wavelet-LHH_gldm_DependenceNonUniformity                      | 9,78097 | 1,67E-09 | 2,67E-09 | 1 |
| wavelet-HHL_glszm_LargeAreaEmphasis                           | 9,68542 | 1,76E-09 | 2,8E-09  | 3 |
| log-sigma-5-0-mm-3D_gldm_GrayLevelNonUniformity               | 9,66335 | 1,84E-09 | 2,92E-09 | 3 |
| log-sigma-3-0-mm-3D_gldm_SmallDependenceHighGrayLevelEmphasis | 9,73672 | 1,86E-09 | 2,95E-09 | 1 |
| log-sigma-5-0-mm-3D_glrlm_LowGrayLevelRunEmphasis             | 9,71904 | 1,96E-09 | 3,1E-09  | 3 |
| log-sigma-5-0-mm-3D_glszm_GrayLevelNonUniformity              | 9,64288 | 2,27E-09 | 3,59E-09 | 1 |
| wavelet-HHL_glszm_ZoneVariance                                | 9,56897 | 2,28E-09 | 3,61E-09 | 3 |
| wavelet-HHL_gldm_Autocorrelation                              | 9,63038 | 2,34E-09 | 3,69E-09 | 1 |
| wavelet-LLL_gldm_DependenceNonUniformity                      | 9,61562 | 2,41E-09 | 3,79E-09 | 1 |
| log-sigma-5-0-mm-3D_glszm_LowGrayLevelZoneEmphasis            | 9,62787 | 2,43E-09 | 3,82E-09 | 3 |
| wavelet-HLL_gldm_Autocorrelation                              | 9,50742 | 3,07E-09 | 4,82E-09 | 1 |
| log-sigma-3-0-mm-3D_glrlm_LowGrayLevelRunEmphasis             | 9,50974 | 3,09E-09 | 4,85E-09 | 3 |
| wavelet-HLH_glrlm_RunLengthNonUniformity                      | 9,42819 | 3,64E-09 | 5,69E-09 | 1 |
| log-sigma-4-0-mm-3D_gldm_GrayLevelNonUniformity               | 9,32688 | 3,89E-09 | 6,09E-09 | 3 |
| log-sigma-2-0-mm-3D_gldm_DependenceNonUniformity              | 9,37466 | 4,09E-09 | 6,39E-09 | 1 |
| wavelet-HHH_glszm_SizeZoneNonUniformity                       | 9,36275 | 4,2E-09  | 6,54E-09 | 1 |
| wavelet-HLH_glrlm_ShortRunLowGrayLevelEmphasis                | 9,36629 | 4,2E-09  | 6,54E-09 | 3 |
| wavelet-HLL_glrlm_RunLengthNonUniformity                      | 9,32862 | 4,53E-09 | 7,04E-09 | 1 |
| original_gldm_Idn                                             | 9,32566 | 4,57E-09 | 7,1E-09  | 3 |
| wavelet-HHH_glrlm_LowGrayLevelRunEmphasis                     | 9,30913 | 4,74E-09 | 7,35E-09 | 3 |
| log-sigma-2-0-mm-3D_glrlm_HighGrayLevelRunEmphasis            | 9,30395 | 4,82E-09 | 7,46E-09 | 1 |
| log-sigma-2-0-mm-3D_gldm_HighGrayLevelEmphasis                | 9,30374 | 4,82E-09 | 7,46E-09 | 1 |
| wavelet-HHL_glrlm_RunLengthNonUniformity                      | 9,26916 | 5,16E-09 | 7,97E-09 | 1 |
| wavelet-LLH_glszm_LowGrayLevelZoneEmphasis                    | 9,27012 | 5,18E-09 | 7,98E-09 | 3 |
| wavelet-LHL_glrlm_GrayLevelNonUniformity                      | 9,26322 | 5,23E-09 | 8,06E-09 | 3 |
| log-sigma-2-0-mm-3D_glszm_HighGrayLevelZoneEmphasis           | 9,26603 | 5,25E-09 | 8,07E-09 | 1 |
| log-sigma-3-0-mm-3D_glrlm_ShortRunLowGrayLevelEmphasis        | 9,23229 | 5,7E-09  | 8,75E-09 | 3 |
| log-sigma-3-0-mm-3D_gldm_LargeDependenceLowGrayLevelEmphasis  | 9,2251  | 5,75E-09 | 8,81E-09 | 3 |
| log-sigma-2-0-mm-3D_gldm_Autocorrelation                      | 9,19007 | 6,2E-09  | 9,49E-09 | 1 |
| log-sigma-5-0-mm-3D_glrlm_RunLengthNonUniformity              | 9,10591 | 7,41E-09 | 1,13E-08 | 1 |
| wavelet-LHL_firstorder_TotalEnergy                            | 8,16753 | 7,44E-09 | 1,13E-08 | 1 |
| wavelet-LHL_firstorder_Energy                                 | 8,16753 | 7,44E-09 | 1,13E-08 | 1 |
| log-sigma-3-0-mm-3D_gldm_LowGrayLevelEmphasis                 | 9,08434 | 7,89E-09 | 1,2E-08  | 3 |
| log-sigma-3-0-mm-3D_glrlm_ShortRunHighGrayLevelEmphasis       | 9,07462 | 8,04E-09 | 1,22E-08 | 1 |
| log-sigma-3-0-mm-3D_gldm_GrayLevelNonUniformity               | 8,97912 | 8,49E-09 | 1,29E-08 | 3 |
| wavelet-HHH_gldm_LowGrayLevelEmphasis                         | 8,99271 | 9,55E-09 | 1,45E-08 | 3 |
| wavelet-LLL_gldm_Idn                                          | 8,9652  | 1,02E-08 | 1,54E-08 | 3 |
| log-sigma-2-0-mm-3D_gldm_ClusterProminence                    | 8,92967 | 1,09E-08 | 1,65E-08 | 1 |
| wavelet-HHH_glszm_SmallAreaLowGrayLevelEmphasis               | 8,84411 | 1,14E-08 | 1,72E-08 | 3 |
| wavelet-LLH_gldm_DependenceNonUniformity                      | 8,90701 | 1,15E-08 | 1,74E-08 | 1 |
| log-sigma-2-0-mm-3D_gldm_GrayLevelNonUniformity               | 8,84018 | 1,16E-08 | 1,75E-08 | 3 |
| wavelet-LLH_glrlm_GrayLevelNonUniformity                      | 8,89489 | 1,18E-08 | 1,78E-08 | 3 |
| wavelet-LHH_gldm_LargeDependenceLowGrayLevelEmphasis          | 8,8927  | 1,19E-08 | 1,79E-08 | 3 |
| wavelet-HLL_glrlm_LongRunLowGrayLevelEmphasis                 | 8,89047 | 1,2E-08  | 1,8E-08  | 3 |
| wavelet-HLH_gldm_GrayLevelNonUniformity                       | 8,87997 | 1,22E-08 | 1,83E-08 | 3 |
| wavelet-LLL_glszm_GrayLevelNonUniformity                      | 8,87086 | 1,25E-08 | 1,87E-08 | 3 |

|                                                              |         |          |          |   |
|--------------------------------------------------------------|---------|----------|----------|---|
| log-sigma-4-0-mm-3D_gldm_LargeDependenceLowGrayLevelEmphasis | 8,85467 | 1,31E-08 | 1,96E-08 | 3 |
| wavelet-LLL_gldm_GrayLevelNonUniformity                      | 8,77423 | 1,35E-08 | 2,01E-08 | 3 |
| wavelet-LHL_gldm_GrayLevelNonUniformity                      | 8,77167 | 1,35E-08 | 2,02E-08 | 3 |
| wavelet-LLL_glrlm_GrayLevelNonUniformity                     | 8,83423 | 1,35E-08 | 2,02E-08 | 3 |
| wavelet-HLL_glszm_LowGrayLevelZoneEmphasis                   | 8,80352 | 1,46E-08 | 2,17E-08 | 3 |
| original_gldm_GrayLevelNonUniformity                         | 8,71706 | 1,53E-08 | 2,28E-08 | 3 |
| original_glrlm_GrayLevelNonUniformity                        | 8,77565 | 1,54E-08 | 2,29E-08 | 3 |
| log-sigma-5-0-mm-3D_glszm_SizeZoneNonUniformity              | 8,77408 | 1,55E-08 | 2,29E-08 | 1 |
| wavelet-LHL_gldm_DependenceNonUniformity                     | 8,76091 | 1,59E-08 | 2,36E-08 | 1 |
| log-sigma-5-0-mm-3D_firstorder_Mean                          | 8,75838 | 1,61E-08 | 2,37E-08 | 3 |
| wavelet-LHH_glrlm_LongRunLowGrayLevelEmphasis                | 8,75036 | 1,64E-08 | 2,41E-08 | 3 |
| wavelet-LLH_glrlm_LowGrayLevelRunEmphasis                    | 8,72306 | 1,74E-08 | 2,56E-08 | 3 |
| wavelet-LLH_gldm_LargeDependenceLowGrayLevelEmphasis         | 8,67956 | 1,91E-08 | 2,81E-08 | 3 |
| log-sigma-5-0-mm-3D_glszm_GrayLevelVariance                  | 8,67433 | 1,94E-08 | 2,86E-08 | 1 |
| log-sigma-5-0-mm-3D_gldm_LowGrayLevelEmphasis                | 8,63272 | 2,15E-08 | 3,16E-08 | 3 |
| log-sigma-4-0-mm-3D_glszm_LowGrayLevelZoneEmphasis           | 8,63841 | 2,17E-08 | 3,17E-08 | 3 |
| wavelet-LLH_gldm_LowGrayLevelEmphasis                        | 8,61487 | 2,21E-08 | 3,24E-08 | 3 |
| log-sigma-5-0-mm-3D_glrlm_LongRunLowGrayLevelEmphasis        | 8,59278 | 2,38E-08 | 3,48E-08 | 3 |
| log-sigma-2-0-mm-3D_glszm_LargeAreaEmphasis                  | 8,46081 | 2,75E-08 | 4,01E-08 | 3 |
| wavelet-LHH_gldm_GrayLevelNonUniformity                      | 8,51077 | 2,78E-08 | 4,06E-08 | 3 |
| log-sigma-5-0-mm-3D_firstorder_Median                        | 8,50269 | 2,84E-08 | 4,14E-08 | 3 |
| log-sigma-4-0-mm-3D_glrlm_RunLengthNonUniformity             | 8,45881 | 3,13E-08 | 4,54E-08 | 1 |
| log-sigma-2-0-mm-3D_glszm_SmallAreaLowGrayLevelEmphasis      | 8,44528 | 3,27E-08 | 4,75E-08 | 3 |
| log-sigma-3-0-mm-3D_gldm_Autocorrelation                     | 8,38361 | 3,74E-08 | 5,42E-08 | 1 |
| log-sigma-2-0-mm-3D_glszm_ZoneVariance                       | 8,27217 | 4,21E-08 | 6,1E-08  | 3 |
| original_glszm_LowGrayLevelZoneEmphasis                      | 8,29761 | 4,54E-08 | 6,56E-08 | 3 |
| wavelet-HHL_glrlm_LongRunHighGrayLevelEmphasis               | 8,28856 | 4,59E-08 | 6,63E-08 | 1 |
| log-sigma-3-0-mm-3D_gldm_HighGrayLevelEmphasis               | 8,27831 | 4,73E-08 | 6,82E-08 | 1 |
| wavelet-HHH_glrlm_ShortRunLowGrayLevelEmphasis               | 8,27094 | 4,77E-08 | 6,88E-08 | 3 |
| original_glrlm_RunLengthNonUniformity                        | 8,25427 | 4,94E-08 | 7,11E-08 | 1 |
| log-sigma-3-0-mm-3D_glrlm_HighGrayLevelRunEmphasis           | 8,24972 | 5,04E-08 | 7,24E-08 | 1 |
| original_firstorder_10Percentile                             | 8,22273 | 5,29E-08 | 7,6E-08  | 2 |
| wavelet-LHH_glrlm_RunLengthNonUniformity                     | 8,19811 | 5,6E-08  | 8,03E-08 | 1 |
| wavelet-LLH_glrlm_ShortRunLowGrayLevelEmphasis               | 8,13312 | 5,78E-08 | 8,27E-08 | 3 |
| log-sigma-3-0-mm-3D_glrlm_RunLengthNonUniformity             | 8,16775 | 6E-08    | 8,58E-08 | 1 |
| wavelet-HLH_glrlm_ShortRunHighGrayLevelEmphasis              | 8,13044 | 6,53E-08 | 9,32E-08 | 1 |
| log-sigma-5-0-mm-3D_firstorder_RootMeanSquared               | 8,11343 | 6,79E-08 | 9,69E-08 | 3 |
| log-sigma-3-0-mm-3D_glszm_LargeAreaEmphasis                  | 8,05302 | 6,93E-08 | 9,87E-08 | 3 |
| wavelet-HHL_gldm_Idn                                         | 8,0964  | 7,07E-08 | 1E-07    | 3 |
| wavelet-HLL_glrlm_LongRunHighGrayLevelEmphasis               | 8,06908 | 7,52E-08 | 1,07E-07 | 1 |
| log-sigma-4-0-mm-3D_firstorder_90Percentile                  | 8,03363 | 8,12E-08 | 1,15E-07 | 1 |
| log-sigma-3-0-mm-3D_glszm_SmallAreaLowGrayLevelEmphasis      | 7,95285 | 9,86E-08 | 1,4E-07  | 3 |
| wavelet-HLL_glrlm_LowGrayLevelRunEmphasis                    | 7,94011 | 1E-07    | 1,42E-07 | 3 |
| wavelet-LHH_gldm_LowGrayLevelEmphasis                        | 7,93666 | 1,01E-07 | 1,43E-07 | 3 |
| wavelet-LHH_glrlm_LowGrayLevelRunEmphasis                    | 7,91385 | 1,06E-07 | 1,5E-07  | 3 |
| log-sigma-2-0-mm-3D_gldm_Idmn                                | 7,90651 | 1,08E-07 | 1,53E-07 | 3 |
| log-sigma-3-0-mm-3D_glszm_SmallAreaHighGrayLevelEmphasis     | 7,89854 | 1,11E-07 | 1,56E-07 | 1 |

|                                                              |         |          |          |   |
|--------------------------------------------------------------|---------|----------|----------|---|
| log-sigma-2-0-mm-3D_glrlm_RunLengthNonUniformity             | 7,89129 | 1,12E-07 | 1,57E-07 | 1 |
| wavelet-LHL_glszm_SmallAreaHighGrayLevelEmphasis             | 7,87699 | 1,15E-07 | 1,62E-07 | 1 |
| wavelet-HHL_firstorder_RootMeanSquared                       | 7,8646  | 1,19E-07 | 1,66E-07 | 1 |
| log-sigma-4-0-mm-3D_glszm_LargeAreaEmphasis                  | 7,8022  | 1,23E-07 | 1,72E-07 | 3 |
| wavelet-LHH_glszm_LargeAreaEmphasis                          | 7,80077 | 1,23E-07 | 1,72E-07 | 3 |
| log-sigma-3-0-mm-3D_glszm_ZoneVariance                       | 7,79773 | 1,24E-07 | 1,73E-07 | 3 |
| log-sigma-2-0-mm-3D_glcm_Imc1                                | 7,84096 | 1,25E-07 | 1,75E-07 | 3 |
| wavelet-HLL_gldm_LowGrayLevelEmphasis                        | 7,8308  | 1,28E-07 | 1,79E-07 | 3 |
| wavelet-HHH_firstorder_Range                                 | 7,81557 | 1,33E-07 | 1,85E-07 | 1 |
| wavelet-LLL_glrlm_RunLengthNonUniformity                     | 7,80294 | 1,36E-07 | 1,89E-07 | 1 |
| wavelet-HHL_gldm_LargeDependenceLowGrayLevelEmphasis         | 7,8001  | 1,38E-07 | 1,92E-07 | 3 |
| wavelet-LHH_glszm_ZoneVariance                               | 7,74362 | 1,4E-07  | 1,94E-07 | 3 |
| wavelet-HLH_glszm_HighGrayLevelZoneEmphasis                  | 7,7233  | 1,63E-07 | 2,26E-07 | 1 |
| log-sigma-5-0-mm-3D_glcm_Imc2                                | 7,72072 | 1,64E-07 | 2,27E-07 | 1 |
| log-sigma-3-0-mm-3D_glszm_HighGrayLevelZoneEmphasis          | 7,70034 | 1,73E-07 | 2,4E-07  | 1 |
| wavelet-HHH_glcm_JointAverage                                | 7,66671 | 1,85E-07 | 2,56E-07 | 1 |
| wavelet-HLL_glrlm_ShortRunLowGrayLevelEmphasis               | 7,66235 | 1,88E-07 | 2,59E-07 | 3 |
| log-sigma-2-0-mm-3D_gldm_LargeDependenceLowGrayLevelEmphasis | 7,62095 | 2,05E-07 | 2,83E-07 | 3 |
| wavelet-LHL_glrlm_RunLengthNonUniformity                     | 7,5157  | 2,61E-07 | 3,58E-07 | 1 |
| wavelet-HHL_firstorder_TotalEnergy                           | 6,84221 | 2,83E-07 | 3,88E-07 | 1 |
| wavelet-HHL_firstorder_Energy                                | 6,84222 | 2,83E-07 | 3,88E-07 | 1 |
| wavelet-HLH_glszm_ZoneVariance                               | 7,38536 | 3,17E-07 | 4,35E-07 | 3 |
| wavelet-HLL_glszm_LargeAreaEmphasis                          | 7,42724 | 3,19E-07 | 4,36E-07 | 3 |
| log-sigma-3-0-mm-3D_glcm_Idmn                                | 7,42685 | 3,2E-07  | 4,38E-07 | 3 |
| log-sigma-4-0-mm-3D_glszm_ZoneVariance                       | 7,34657 | 3,48E-07 | 4,75E-07 | 3 |
| wavelet-LHL_glrlm_ShortRunHighGrayLevelEmphasis              | 7,37709 | 3,57E-07 | 4,87E-07 | 1 |
| wavelet-HLL_glszm_ZoneVariance                               | 7,36967 | 3,63E-07 | 4,95E-07 | 3 |
| wavelet-HHH_firstorder_Minimum                               | 7,36653 | 3,66E-07 | 4,97E-07 | 3 |
| wavelet-LHH_glszm_LowGrayLevelZoneEmphasis                   | 7,36103 | 3,71E-07 | 5,04E-07 | 3 |
| wavelet-LLH_glszm_SmallAreaLowGrayLevelEmphasis              | 7,35331 | 3,75E-07 | 5,09E-07 | 3 |
| wavelet-HLH_glcm_Idn                                         | 7,33527 | 3,95E-07 | 5,36E-07 | 3 |
| wavelet-HLH_glszm_LargeAreaEmphasis                          | 7,27229 | 4,11E-07 | 5,57E-07 | 3 |
| wavelet-HLH_gldm_SmallDependenceHighGrayLevelEmphasis        | 7,26319 | 4,21E-07 | 5,69E-07 | 1 |
| wavelet-LLH_gldm_GrayLevelNonUniformity                      | 7,25048 | 4,32E-07 | 5,83E-07 | 3 |
| wavelet-HLH_glszm_SmallAreaHighGrayLevelEmphasis             | 7,24236 | 4,85E-07 | 6,54E-07 | 1 |
| wavelet-HHH_glszm_ZoneVariance                               | 7,14777 | 5,48E-07 | 7,38E-07 | 3 |
| wavelet-LHL_glszm_HighGrayLevelZoneEmphasis                  | 7,17018 | 5,71E-07 | 7,68E-07 | 1 |
| log-sigma-5-0-mm-3D_glszm_LargeAreaEmphasis                  | 7,08213 | 6,39E-07 | 8,58E-07 | 3 |
| wavelet-HLH_glrlm_HighGrayLevelRunEmphasis                   | 7,11304 | 6,5E-07  | 8,73E-07 | 1 |
| wavelet-LHL_glrlm_HighGrayLevelRunEmphasis                   | 7,11016 | 6,54E-07 | 8,77E-07 | 1 |
| wavelet-LHL_gldm_HighGrayLevelEmphasis                       | 7,10633 | 6,6E-07  | 8,84E-07 | 1 |
| wavelet-LLH_glrlm_LongRunHighGrayLevelEmphasis               | 7,07668 | 7,05E-07 | 9,43E-07 | 1 |
| wavelet-HLH_gldm_HighGrayLevelEmphasis                       | 7,07288 | 7,12E-07 | 9,52E-07 | 1 |
| wavelet-LHL_firstorder_RootMeanSquared                       | 7,05092 | 7,48E-07 | 9,99E-07 | 1 |
| wavelet-LHH_glrlm_ShortRunHighGrayLevelEmphasis              | 7,04136 | 7,64E-07 | 1,02E-06 | 1 |
| wavelet-LLH_glrlm_RunLengthNonUniformity                     | 6,92055 | 1,01E-06 | 1,34E-06 | 1 |
| wavelet-HHL_glszm_GrayLevelNonUniformity                     | 6,85751 | 1,16E-06 | 1,54E-06 | 1 |

|                                                              |         |          |          |   |
|--------------------------------------------------------------|---------|----------|----------|---|
| wavelet-LHH_glrIm_ShortRunLowGrayLevelEmphasis               | 6,8109  | 1,3E-06  | 1,72E-06 | 3 |
| wavelet-LHL_glszm_LargeAreaEmphasis                          | 6,71202 | 1,5E-06  | 1,99E-06 | 3 |
| wavelet-LHL_glcm_Autocorrelation                             | 6,73864 | 1,52E-06 | 2,02E-06 | 1 |
| wavelet-HLL_glcm_Correlation                                 | 6,72272 | 1,58E-06 | 2,09E-06 | 2 |
| wavelet-LHL_glcm_Idn                                         | 6,69877 | 1,67E-06 | 2,21E-06 | 3 |
| wavelet-HLH_glcm_Autocorrelation                             | 6,69083 | 1,7E-06  | 2,25E-06 | 1 |
| log-sigma-4-0-mm-3D_firstorder_Mean                          | 6,65072 | 1,86E-06 | 2,46E-06 | 3 |
| wavelet-LHL_glszm_ZoneVariance                               | 6,59537 | 1,97E-06 | 2,59E-06 | 3 |
| log-sigma-4-0-mm-3D_glrIm_ShortRunHighGrayLevelEmphasis      | 6,60414 | 2,08E-06 | 2,74E-06 | 1 |
| wavelet-LHL_glszm_LowGrayLevelZoneEmphasis                   | 6,58599 | 2,17E-06 | 2,85E-06 | 3 |
| log-sigma-4-0-mm-3D_glcm_Autocorrelation                     | 6,5496  | 2,36E-06 | 3,09E-06 | 1 |
| log-sigma-5-0-mm-3D_gldm_LargeDependenceLowGrayLevelEmphasis | 6,50119 | 2,67E-06 | 3,5E-06  | 3 |
| log-sigma-5-0-mm-3D_glszm_ZoneVariance                       | 6,45746 | 2,69E-06 | 3,53E-06 | 3 |
| wavelet-HHL_glcm_Idmn                                        | 6,488   | 2,71E-06 | 3,54E-06 | 3 |
| wavelet-LLL_glcm_Idmn                                        | 6,45796 | 2,9E-06  | 3,78E-06 | 3 |
| wavelet-HLL_firstorder_TotalEnergy                           | 5,97686 | 2,93E-06 | 3,82E-06 | 1 |
| wavelet-HLL_firstorder_Energy                                | 5,97688 | 2,93E-06 | 3,82E-06 | 1 |
| log-sigma-4-0-mm-3D_gldm_HighGrayLevelEmphasis               | 6,38304 | 3,45E-06 | 4,49E-06 | 1 |
| original_glcm_Idmn                                           | 6,36594 | 3,57E-06 | 4,65E-06 | 3 |
| log-sigma-4-0-mm-3D_glrIm_HighGrayLevelRunEmphasis           | 6,33015 | 3,9E-06  | 5,06E-06 | 1 |
| log-sigma-4-0-mm-3D_firstorder_Median                        | 6,24358 | 4,73E-06 | 6,14E-06 | 3 |
| log-sigma-4-0-mm-3D_glcm_Idn                                 | 6,20668 | 5,15E-06 | 6,67E-06 | 3 |
| log-sigma-4-0-mm-3D_glszm_LargeAreaLowGrayLevelEmphasis      | 6,20397 | 5,17E-06 | 6,69E-06 | 3 |
| wavelet-LHH_glszm_SmallAreaHighGrayLevelEmphasis             | 6,19293 | 5,3E-06  | 6,86E-06 | 1 |
| wavelet-HLL_gldm_LargeDependenceLowGrayLevelEmphasis         | 6,18656 | 5,4E-06  | 6,97E-06 | 3 |
| original_glszm_SmallAreaLowGrayLevelEmphasis                 | 6,1729  | 5,58E-06 | 7,19E-06 | 3 |
| wavelet-LHL_glcm_ClusterProminence                           | 6,12352 | 6,22E-06 | 8,01E-06 | 1 |
| wavelet-HHH_firstorder_Maximum                               | 6,11676 | 6,32E-06 | 8,14E-06 | 1 |
| log-sigma-4-0-mm-3D_firstorder_RootMeanSquared               | 6,11193 | 6,4E-06  | 8,22E-06 | 3 |
| wavelet-HHL_glszm_LargeAreaLowGrayLevelEmphasis              | 6,10211 | 6,52E-06 | 8,37E-06 | 3 |
| wavelet-HLL_glcm_Idn                                         | 6,09005 | 6,73E-06 | 8,63E-06 | 3 |
| log-sigma-2-0-mm-3D_firstorder_TotalEnergy                   | 5,65411 | 6,96E-06 | 8,9E-06  | 1 |
| log-sigma-2-0-mm-3D_firstorder_Energy                        | 5,65411 | 6,96E-06 | 8,9E-06  | 1 |
| original_glszm_LargeAreaEmphasis                             | 6,02326 | 7,85E-06 | 1E-05    | 3 |
| wavelet-LLH_glszm_LargeAreaEmphasis                          | 5,98878 | 7,95E-06 | 1,01E-05 | 3 |
| original_glszm_ZoneVariance                                  | 5,97538 | 8,76E-06 | 1,12E-05 | 3 |
| wavelet-HLL_glszm_SmallAreaLowGrayLevelEmphasis              | 5,97402 | 8,79E-06 | 1,12E-05 | 3 |
| wavelet-LLL_glszm_LowGrayLevelZoneEmphasis                   | 5,97309 | 8,8E-06  | 1,12E-05 | 3 |
| wavelet-LLH_glszm_LargeAreaLowGrayLevelEmphasis              | 5,95619 | 9,22E-06 | 1,17E-05 | 3 |
| wavelet-LHL_glrIm_LongRunHighGrayLevelEmphasis               | 5,91865 | 9,96E-06 | 1,26E-05 | 1 |
| wavelet-HLL_firstorder_RootMeanSquared                       | 5,91079 | 1,01E-05 | 1,29E-05 | 1 |
| wavelet-LLH_glszm_ZoneVariance                               | 5,85603 | 1,08E-05 | 1,37E-05 | 3 |
| log-sigma-3-0-mm-3D_glszm_LargeAreaLowGrayLevelEmphasis      | 5,84357 | 1,18E-05 | 1,49E-05 | 3 |
| wavelet-HLH_glszm_GrayLevelNonUniformity                     | 5,83655 | 1,2E-05  | 1,52E-05 | 1 |
| wavelet-LHH_glcm_Correlation                                 | 5,79524 | 1,32E-05 | 1,67E-05 | 2 |
| wavelet-LHH_glszm_HighGrayLevelZoneEmphasis                  | 5,79293 | 1,33E-05 | 1,67E-05 | 1 |
| log-sigma-5-0-mm-3D_glszm_LargeAreaLowGrayLevelEmphasis      | 5,77085 | 1,4E-05  | 1,76E-05 | 3 |

|                                                               |         |          |          |   |
|---------------------------------------------------------------|---------|----------|----------|---|
| wavelet-HLH_glcmm_Correlation                                 | 5,77045 | 1,4E-05  | 1,77E-05 | 2 |
| original_glrmm_LongRunLowGrayLevelEmphasis                    | 5,6657  | 1,79E-05 | 2,25E-05 | 3 |
| wavelet-LLL_glszm_SmallAreaLowGrayLevelEmphasis               | 5,55796 | 2,28E-05 | 2,86E-05 | 3 |
| log-sigma-2-0-mm-3D_glszm_LargeAreaLowGrayLevelEmphasis       | 5,53021 | 2,43E-05 | 3,04E-05 | 3 |
| wavelet-LHL_glszm_SmallAreaLowGrayLevelEmphasis               | 5,50395 | 2,59E-05 | 3,24E-05 | 3 |
| wavelet-HHL_glcmm_ClusterProminence                           | 5,47455 | 2,61E-05 | 3,26E-05 | 1 |
| wavelet-LHL_firstorder_Kurtosis                               | 5,42108 | 2,97E-05 | 3,71E-05 | 3 |
| wavelet-LHH_glszm_SmallAreaEmphasis                           | 5,43883 | 3E-05    | 3,75E-05 | 1 |
| wavelet-LHH_glszm_SmallAreaLowGrayLevelEmphasis               | 5,40955 | 3,21E-05 | 4E-05    | 3 |
| wavelet-LLH_firstorder_TotalEnergy                            | 5,07505 | 3,23E-05 | 4,01E-05 | 1 |
| wavelet-LLH_firstorder_Energy                                 | 5,07505 | 3,23E-05 | 4,01E-05 | 1 |
| log-sigma-3-0-mm-3D_glcmm_ClusterProminence                   | 5,33477 | 3,81E-05 | 4,73E-05 | 1 |
| wavelet-HHH_glszm_GrayLevelNonUniformity                      | 5,30936 | 3,84E-05 | 4,76E-05 | 1 |
| wavelet-HLH_glcmm_Imc1                                        | 5,27162 | 4,41E-05 | 5,46E-05 | 3 |
| log-sigma-4-0-mm-3D_glszm_HighGrayLevelZoneEmphasis           | 5,24658 | 4,69E-05 | 5,8E-05  | 1 |
| log-sigma-4-0-mm-3D_gldm_SmallDependenceHighGrayLevelEmphasis | 5,24347 | 4,7E-05  | 5,82E-05 | 1 |
| wavelet-LHH_glrmm_HighGrayLevelRunEmphasis                    | 5,12767 | 6,13E-05 | 7,58E-05 | 1 |
| log-sigma-5-0-mm-3D_firstorder_Maximum                        | 5,12528 | 6,18E-05 | 7,62E-05 | 1 |
| wavelet-LHH_gldm_HighGrayLevelEmphasis                        | 5,10517 | 6,46E-05 | 7,96E-05 | 1 |
| original_gldm_LargeDependenceLowGrayLevelEmphasis             | 5,04525 | 7,43E-05 | 9,14E-05 | 3 |
| wavelet-LHL_glrmm_LongRunLowGrayLevelEmphasis                 | 5,04412 | 7,45E-05 | 9,17E-05 | 3 |
| log-sigma-5-0-mm-3D_glcmm_Autocorrelation                     | 4,99365 | 8,37E-05 | 0,000103 | 1 |
| log-sigma-3-0-mm-3D_firstorder_Mean                           | 4,84908 | 0,000117 | 0,000143 | 3 |
| log-sigma-5-0-mm-3D_gldm_HighGrayLevelEmphasis                | 4,84231 | 0,000119 | 0,000145 | 1 |
| wavelet-LLH_glcmm_Imc1                                        | 4,82993 | 0,000122 | 0,000149 | 3 |
| original_glszm_GrayLevelNonUniformity                         | 4,82035 | 0,000124 | 0,000152 | 1 |
| log-sigma-4-0-mm-3D_glszm_SmallAreaHighGrayLevelEmphasis      | 4,80487 | 0,000129 | 0,000158 | 1 |
| original_glrmm_LowGrayLevelRunEmphasis                        | 4,79229 | 0,000133 | 0,000163 | 3 |
| log-sigma-5-0-mm-3D_glrmm_HighGrayLevelRunEmphasis            | 4,75362 | 0,000145 | 0,000177 | 1 |
| wavelet-LHH_firstorder_Kurtosis                               | 4,7204  | 0,000157 | 0,000191 | 3 |
| log-sigma-5-0-mm-3D_glrmm_ShortRunHighGrayLevelEmphasis       | 4,69965 | 0,000165 | 0,0002   | 1 |
| log-sigma-2-0-mm-3D_glrmm_LongRunHighGrayLevelEmphasis        | 4,6826  | 0,000171 | 0,000208 | 1 |
| log-sigma-3-0-mm-3D_firstorder_TotalEnergy                    | 4,395   | 0,00019  | 0,00023  | 1 |
| log-sigma-3-0-mm-3D_firstorder_Energy                         | 4,395   | 0,00019  | 0,00023  | 1 |
| wavelet-LHH_glcmm_Autocorrelation                             | 4,56963 | 0,000221 | 0,000268 | 1 |
| original_gldm_LowGrayLevelEmphasis                            | 4,56874 | 0,000223 | 0,000269 | 3 |
| wavelet-LLL_firstorder_Skewness                               | 4,52928 | 0,000243 | 0,000294 | 3 |
| wavelet-HHH_glszm_LargeAreaEmphasis                           | 4,52032 | 0,000248 | 0,0003   | 3 |
| wavelet-HHL_firstorder_Kurtosis                               | 4,49732 | 0,000253 | 0,000305 | 3 |
| original_glrmm_ShortRunLowGrayLevelEmphasis                   | 4,50846 | 0,000256 | 0,000308 | 3 |
| log-sigma-5-0-mm-3D_glcmm_Idn                                 | 4,50627 | 0,000256 | 0,000308 | 3 |
| log-sigma-3-0-mm-3D_firstorder_RootMeanSquared                | 4,50005 | 0,00026  | 0,000313 | 3 |
| wavelet-LHL_gldm_LargeDependenceLowGrayLevelEmphasis          | 4,48423 | 0,000271 | 0,000326 | 3 |
| wavelet-HLH_firstorder_Kurtosis                               | 4,39806 | 0,00033  | 0,000396 | 3 |
| log-sigma-3-0-mm-3D_firstorder_Median                         | 4,38316 | 0,00034  | 0,000408 | 3 |
| wavelet-LHL_glrmm_LowGrayLevelRunEmphasis                     | 4,38264 | 0,000341 | 0,000408 | 3 |
| wavelet-LHH_glszm_SizeZoneNonUniformityNormalized             | 4,32487 | 0,000389 | 0,000465 | 1 |

|                                                         |         |          |          |   |
|---------------------------------------------------------|---------|----------|----------|---|
| wavelet-LHL_gldm_LowGrayLevelEmphasis                   | 4,26009 | 0,000451 | 0,000539 | 3 |
| log-sigma-5-0-mm-3D_firstorder_90Percentile             | 4,25352 | 0,000458 | 0,000546 | 1 |
| log-sigma-2-0-mm-3D_firstorder_RootMeanSquared          | 4,21221 | 0,000503 | 0,0006   | 3 |
| wavelet-LHL_glrIm_ShortRunLowGrayLevelEmphasis          | 4,19672 | 0,000522 | 0,000621 | 3 |
| log-sigma-2-0-mm-3D_firstorder_Kurtosis                 | 4,15416 | 0,000559 | 0,000665 | 3 |
| wavelet-LHH_glcM_Imc1                                   | 4,14883 | 0,000582 | 0,000691 | 3 |
| wavelet-LHL_glcM_Idmn                                   | 4,13139 | 0,000606 | 0,000719 | 3 |
| wavelet-LLL_gldm_LargeDependenceHighGrayLevelEmphasis   | 4,11915 | 0,000623 | 0,000738 | 2 |
| wavelet-HLL_firstorder_Kurtosis                         | 4,08983 | 0,000648 | 0,000767 | 3 |
| log-sigma-4-0-mm-3D_glszm_SmallAreaLowGrayLevelEmphasis | 4,10109 | 0,000651 | 0,00077  | 3 |
| wavelet-HLH_glcM_ClusterProminence                      | 4,08283 | 0,000658 | 0,000778 | 1 |
| wavelet-LHH_glcM_Idmn                                   | 4,0688  | 0,000699 | 0,000825 | 3 |
| log-sigma-3-0-mm-3D_glrIm_LongRunHighGrayLevelEmphasis  | 4,03159 | 0,000761 | 0,000897 | 1 |
| wavelet-LHH_glszm_LargeAreaLowGrayLevelEmphasis         | 3,95372 | 0,000908 | 0,00107  | 3 |
| original_glcM_Correlation                               | 3,94252 | 0,000931 | 0,001096 | 2 |
| wavelet-HLH_firstorder_RootMeanSquared                  | 3,88486 | 0,001063 | 0,001249 | 2 |
| wavelet-HLL_glcM_ClusterShade                           | 3,86521 | 0,001111 | 0,001304 | 3 |
| wavelet-LLH_glcM_Idn                                    | 3,83262 | 0,001197 | 0,001405 | 3 |
| original_glszm_LargeAreaHighGrayLevelEmphasis           | 3,79923 | 0,001263 | 0,001479 | 3 |
| wavelet-HLL_glcM_ClusterProminence                      | 3,80875 | 0,001263 | 0,001479 | 1 |
| original_firstorder_Skewness                            | 3,79152 | 0,001314 | 0,001536 | 3 |
| log-sigma-5-0-mm-3D_glrIm_LongRunHighGrayLevelEmphasis  | 3,78055 | 0,00135  | 0,001577 | 1 |
| log-sigma-2-0-mm-3D_firstorder_Median                   | 3,76712 | 0,00139  | 0,001622 | 3 |
| wavelet-HHH_gldm_SmallDependenceHighGrayLevelEmphasis   | 3,74972 | 0,001413 | 0,001648 | 1 |
| wavelet-HHH_glcM_Imc1                                   | 3,74446 | 0,001463 | 0,001704 | 3 |
| wavelet-HHH_glszm_SizeZoneNonUniformityNormalized       | 3,68616 | 0,001663 | 0,001935 | 3 |
| log-sigma-2-0-mm-3D_firstorder_Mean                     | 3,681   | 0,001691 | 0,001965 | 3 |
| wavelet-LHL_glcM_Correlation                            | 3,67692 | 0,001707 | 0,001982 | 2 |
| log-sigma-4-0-mm-3D_glrIm_LongRunHighGrayLevelEmphasis  | 3,65183 | 0,001808 | 0,002096 | 1 |
| wavelet-LHL_glszm_LargeAreaLowGrayLevelEmphasis         | 3,48963 | 0,002606 | 0,003019 | 3 |
| wavelet-HHH_glcM_ClusterProminence                      | 3,45386 | 0,002774 | 0,003211 | 1 |
| original_firstorder_Kurtosis                            | 3,43728 | 0,002896 | 0,003349 | 3 |
| wavelet-LHH_glszm_GrayLevelNonUniformity                | 3,43797 | 0,002931 | 0,003385 | 1 |
| wavelet-LLL_gldm_LargeDependenceLowGrayLevelEmphasis    | 3,4367  | 0,002943 | 0,003396 | 3 |
| wavelet-LHL_glcM_ClusterShade                           | 3,43031 | 0,002984 | 0,003439 | 3 |
| log-sigma-5-0-mm-3D_glszm_HighGrayLevelZoneEmphasis     | 3,42673 | 0,003008 | 0,003463 | 1 |
| log-sigma-4-0-mm-3D_firstorder_TotalEnergy              | 3,29643 | 0,003032 | 0,003484 | 1 |
| log-sigma-4-0-mm-3D_firstorder_Energy                   | 3,29643 | 0,003032 | 0,003484 | 1 |
| wavelet-LLL_glszm_LargeAreaHighGrayLevelEmphasis        | 3,20531 | 0,004869 | 0,005589 | 3 |
| wavelet-LLL_glszm_LargeAreaEmphasis                     | 3,18637 | 0,005159 | 0,005916 | 3 |
| wavelet-HLL_firstorder_Mean                             | 3,17847 | 0,005251 | 0,006015 | 3 |
| wavelet-HLL_glszm_GrayLevelNonUniformity                | 3,16803 | 0,005375 | 0,006151 | 1 |
| log-sigma-3-0-mm-3D_firstorder_Kurtosis                 | 3,10428 | 0,006114 | 0,00699  | 3 |
| log-sigma-3-0-mm-3D_glcM_Imc1                           | 3,10163 | 0,006235 | 0,00712  | 3 |
| wavelet-LLL_firstorder_Kurtosis                         | 3,0785  | 0,0065   | 0,007416 | 3 |
| wavelet-HLL_glcM_Idmn                                   | 3,01554 | 0,007555 | 0,00861  | 3 |
| wavelet-HHH_gldm_DependenceNonUniformity                | 2,95117 | 0,008712 | 0,009918 | 3 |

|                                                               |         |          |          |   |
|---------------------------------------------------------------|---------|----------|----------|---|
| wavelet-LLL_glrIm_LowGrayLevelRunEmphasis                     | 2,9492  | 0,008756 | 0,009959 | 3 |
| wavelet-LLL_glrIm_LongRunLowGrayLevelEmphasis                 | 2,9446  | 0,008847 | 0,010052 | 3 |
| log-sigma-5-0-mm-3D_gldm_SmallDependenceHighGrayLevelEmphasis | 2,92787 | 0,009172 | 0,01041  | 1 |
| wavelet-LLL_glrIm_ShortRunLowGrayLevelEmphasis                | 2,92688 | 0,009199 | 0,010431 | 3 |
| log-sigma-5-0-mm-3D_glszm_SmallAreaHighGrayLevelEmphasis      | 2,90576 | 0,009636 | 0,010915 | 1 |
| wavelet-HHL_gldm_SmallDependenceLowGrayLevelEmphasis          | 2,8869  | 0,010048 | 0,01137  | 3 |
| wavelet-LLH_glcm_Correlation                                  | 2,85057 | 0,01088  | 0,012299 | 2 |
| wavelet-LLL_gldm_SmallDependenceLowGrayLevelEmphasis          | 2,80991 | 0,011903 | 0,013441 | 3 |
| log-sigma-5-0-mm-3D_firstorder_Kurtosis                       | 2,79118 | 0,012265 | 0,013837 | 3 |
| wavelet-LLL_gldm_LowGrayLevelEmphasis                         | 2,78507 | 0,012576 | 0,014174 | 3 |
| wavelet-HLL_gldm_SmallDependenceLowGrayLevelEmphasis          | 2,75445 | 0,013444 | 0,015137 | 3 |
| log-sigma-3-0-mm-3D_gldm_SmallDependenceLowGrayLevelEmphasis  | 2,74991 | 0,013582 | 0,015276 | 2 |
| wavelet-LLH_firstorder_Skewness                               | 2,73127 | 0,014141 | 0,015889 | 2 |
| wavelet-LLL_glszm_ZoneVariance                                | 2,70894 | 0,014852 | 0,016671 | 3 |
| wavelet-HHH_glrIm_ShortRunHighGrayLevelEmphasis               | 2,69644 | 0,015102 | 0,016935 | 1 |
| original_glszm_LargeAreaLowGrayLevelEmphasis                  | 2,69509 | 0,015301 | 0,01714  | 3 |
| wavelet-HLH_glrIm_LongRunHighGrayLevelEmphasis                | 2,63645 | 0,017401 | 0,019474 | 1 |
| wavelet-HLH_glcm_Idmn                                         | 2,6132  | 0,018317 | 0,020479 | 3 |
| log-sigma-5-0-mm-3D_glszm_LargeAreaHighGrayLevelEmphasis      | 2,54098 | 0,018428 | 0,020582 | 3 |
| log-sigma-4-0-mm-3D_glcm_Idmn                                 | 2,58089 | 0,019633 | 0,021905 | 3 |
| wavelet-HLL_glszm_LargeAreaLowGrayLevelEmphasis               | 2,56895 | 0,020145 | 0,022455 | 3 |
| wavelet-LLL_glszm_LargeAreaLowGrayLevelEmphasis               | 2,55885 | 0,020588 | 0,022926 | 3 |
| wavelet-HLH_glszm_LargeAreaLowGrayLevelEmphasis               | 2,55426 | 0,020796 | 0,023134 | 3 |
| log-sigma-5-0-mm-3D_firstorder_TotalEnergy                    | 2,47077 | 0,021665 | 0,024054 | 1 |
| log-sigma-5-0-mm-3D_firstorder_Energy                         | 2,47077 | 0,021666 | 0,024054 | 1 |
| log-sigma-2-0-mm-3D_glszm_LargeAreaHighGrayLevelEmphasis      | 2,42346 | 0,024146 | 0,026781 | 3 |
| wavelet-HHH_glszm_HighGrayLevelZoneEmphasis                   | 2,44185 | 0,026277 | 0,029115 | 1 |
| wavelet-LHL_glszm_GrayLevelNonUniformity                      | 2,41096 | 0,02831  | 0,031337 | 1 |
| wavelet-HHH_glcm_Correlation                                  | 2,39664 | 0,029195 | 0,032285 | 2 |
| log-sigma-4-0-mm-3D_glcm_ClusterShade                         | 2,38065 | 0,03021  | 0,033374 | 3 |
| log-sigma-2-0-mm-3D_glcm_Correlation                          | 2,36422 | 0,031278 | 0,034486 | 2 |
| wavelet-LHL_gldm_LargeDependenceHighGrayLevelEmphasis         | 2,36106 | 0,031254 | 0,034486 | 3 |
| log-sigma-4-0-mm-3D_glcm_ClusterProminence                    | 2,36175 | 0,031445 | 0,034636 | 1 |
| log-sigma-5-0-mm-3D_gldm_LargeDependenceHighGrayLevelEmphasis | 2,34716 | 0,032202 | 0,035435 | 3 |
| log-sigma-4-0-mm-3D_firstorder_Kurtosis                       | 2,30542 | 0,035213 | 0,03871  | 3 |
| wavelet-HHH_glrIm_HighGrayLevelRunEmphasis                    | 2,30474 | 0,035248 | 0,03871  | 1 |
| wavelet-HLH_glszm_SmallAreaEmphasis                           | 2,29532 | 0,036254 | 0,039777 | 1 |
| wavelet-HHH_gldm_HighGrayLevelEmphasis                        | 2,28859 | 0,03648  | 0,039985 | 1 |
| wavelet-LLH_firstorder_Kurtosis                               | 2,2904  | 0,036595 | 0,040072 | 3 |
| wavelet-HLH_firstorder_Median                                 | 2,27391 | 0,037892 | 0,041451 | 2 |
| wavelet-LLH_glszm_LargeAreaHighGrayLevelEmphasis              | 2,18418 | 0,041397 | 0,045241 | 3 |
| log-sigma-5-0-mm-3D_firstorder_Skewness                       | 2,21968 | 0,042242 | 0,046101 | 2 |
| wavelet-HHL_glszm_LargeAreaHighGrayLevelEmphasis              | 2,17482 | 0,042266 | 0,046101 | 3 |
| wavelet-HHH_firstorder_Kurtosis                               | 2,20483 | 0,043564 | 0,047471 | 3 |
| wavelet-HLH_firstorder_Mean                                   | 2,18544 | 0,045649 | 0,049694 | 2 |

|                                                               |         |          |          |      |
|---------------------------------------------------------------|---------|----------|----------|------|
| wavelet-HLH_gldm_LargeDependenceHighGrayLevelEmphasis         | 2,17556 | 0,046621 | 0,050702 | n.s. |
| log-sigma-4-0-mm-3D_glszm_LargeAreaHighGrayLevelEmphasis      | 2,12377 | 0,04731  | 0,051402 | n.s. |
| wavelet-HHH_glcm_Autocorrelation                              | 2,16425 | 0,047436 | 0,051489 | n.s. |
| log-sigma-3-0-mm-3D_glszm_LargeAreaHighGrayLevelEmphasis      | 2,10836 | 0,04894  | 0,05307  | n.s. |
| log-sigma-5-0-mm-3D_glcm_ClusterShade                         | 2,13    | 0,051264 | 0,055536 | n.s. |
| log-sigma-2-0-mm-3D_gldm_LargeDependenceHighGrayLevelEmphasis | 2,09888 | 0,054396 | 0,058872 | n.s. |
| wavelet-HHH_glszm_SmallAreaHighGrayLevelEmphasis              | 2,08015 | 0,056544 | 0,061138 | n.s. |
| wavelet-HHH_firstorder_RootMeanSquared                        | 2,04185 | 0,061525 | 0,066459 | n.s. |
| wavelet-HLL_firstorder_Median                                 | 2,03627 | 0,06193  | 0,066832 | n.s. |
| wavelet-HLL_glszm_LargeAreaHighGrayLevelEmphasis              | 1,9846  | 0,064062 | 0,069066 | n.s. |
| wavelet-HLH_glszm_LargeAreaHighGrayLevelEmphasis              | 1,97412 | 0,065525 | 0,070575 | n.s. |
| wavelet-LLL_firstorder_Minimum                                | 1,99864 | 0,06725  | 0,072364 | n.s. |
| original_gldm_LargeDependenceHighGrayLevelEmphasis            | 1,99056 | 0,068388 | 0,073517 | n.s. |
| log-sigma-4-0-mm-3D_glcm_Correlation                          | 1,93837 | 0,076055 | 0,081681 | n.s. |
| wavelet-HHH_glszm_LargeAreaHighGrayLevelEmphasis              | 1,90142 | 0,076542 | 0,08209  | n.s. |
| wavelet-LHL_firstorder_Median                                 | 1,93476 | 0,076616 | 0,08209  | n.s. |
| wavelet-LHH_glcm_ClusterShade                                 | 1,93274 | 0,076657 | 0,08209  | n.s. |
| wavelet-HLL_firstorder_Skewness                               | 1,93191 | 0,077049 | 0,082431 | n.s. |
| wavelet-HHL_firstorder_Skewness                               | 1,93107 | 0,077197 | 0,082511 | n.s. |
| wavelet-LHH_glszm_LargeAreaHighGrayLevelEmphasis              | 1,88728 | 0,078874 | 0,084223 | n.s. |
| wavelet-HHL_firstorder_Mean                                   | 1,91887 | 0,079119 | 0,084404 | n.s. |
| wavelet-HHH_firstorder_Median                                 | 1,90342 | 0,081651 | 0,087022 | n.s. |
| wavelet-LHH_gldm_LargeDependenceHighGrayLevelEmphasis         | 1,89775 | 0,082581 | 0,087929 | n.s. |
| original_glcm_ClusterShade                                    | 1,89184 | 0,08357  | 0,088897 | n.s. |
| log-sigma-2-0-mm-3D_glcm_ClusterShade                         | 1,88494 | 0,084393 | 0,089687 | n.s. |
| log-sigma-3-0-mm-3D_glcm_ClusterShade                         | 1,8758  | 0,086331 | 0,09166  | n.s. |
| log-sigma-4-0-mm-3D_firstorder_Skewness                       | 1,83247 | 0,093837 | 0,099535 | n.s. |
| log-sigma-5-0-mm-3D_glcm_Correlation                          | 1,82636 | 0,095326 | 0,101018 | n.s. |
| wavelet-LLH_firstorder_Median                                 | 1,81842 | 0,096484 | 0,102149 | n.s. |
| wavelet-LLH_firstorder_Mean                                   | 1,80806 | 0,098879 | 0,104487 | n.s. |
| wavelet-LLL_glcm_Correlation                                  | 1,80811 | 0,098863 | 0,104487 | n.s. |
| log-sigma-5-0-mm-3D_glcm_ClusterProminence                    | 1,76007 | 0,108754 | 0,114813 | n.s. |
| wavelet-LHH_firstorder_Skewness                               | 1,73353 | 0,114599 | 0,12087  | n.s. |
| wavelet-LHL_glszm_LargeAreaHighGrayLevelEmphasis              | 1,69954 | 0,116589 | 0,122852 | n.s. |
| wavelet-LLL_glcm_ClusterShade                                 | 1,7164  | 0,118514 | 0,124763 | n.s. |
| log-sigma-4-0-mm-3D_gldm_LargeDependenceHighGrayLevelEmphasis | 1,69135 | 0,124109 | 0,130531 | n.s. |
| log-sigma-3-0-mm-3D_gldm_LargeDependenceHighGrayLevelEmphasis | 1,64915 | 0,134752 | 0,141591 | n.s. |
| log-sigma-5-0-mm-3D_gldm_SmallDependenceLowGrayLevelEmphasis  | 1,6191  | 0,143184 | 0,15031  | n.s. |
| log-sigma-4-0-mm-3D_gldm_SmallDependenceLowGrayLevelEmphasis  | 1,54867 | 0,163799 | 0,171789 | n.s. |
| wavelet-HHH_glcm_Idn                                          | 1,5264  | 0,170846 | 0,179012 | n.s. |
| original_gldm_SmallDependenceLowGrayLevelEmphasis             | 1,52365 | 0,171732 | 0,179772 | n.s. |
| wavelet-HHH_glszm_LargeAreaLowGrayLevelEmphasis               | 1,5184  | 0,173467 | 0,181418 | n.s. |
| wavelet-LLH_glcm_Idmn                                         | 1,51423 | 0,174795 | 0,182636 | n.s. |

|                                                              |         |          |          |      |
|--------------------------------------------------------------|---------|----------|----------|------|
| log-sigma-2-0-mm-3D_gldm_SmallDependenceLowGrayLevelEmphasis | 1,48485 | 0,184688 | 0,192793 | n.s. |
| wavelet-LHL_firstorder_Skewness                              | 1,46939 | 0,190057 | 0,198061 | n.s. |
| wavelet-HLL_gldm_LargeDependenceHighGrayLevelEmphasis        | 1,46827 | 0,190089 | 0,198061 | n.s. |
| wavelet-LLH_firstorder_RootMeanSquared                       | 1,44542 | 0,198705 | 0,206845 | n.s. |
| log-sigma-3-0-mm-3D_gldm_Correlation                         | 1,39257 | 0,218915 | 0,227671 | n.s. |
| original_gldm_ClusterProminence                              | 1,36096 | 0,226208 | 0,235038 | n.s. |
| wavelet-HHH_firstorder_TotalEnergy                           | 1,34039 | 0,23502  | 0,243741 | n.s. |
| wavelet-HHH_firstorder_Energy                                | 1,34038 | 0,235021 | 0,243741 | n.s. |
| wavelet-LHH_firstorder_TotalEnergy                           | 1,32529 | 0,241659 | 0,250161 | n.s. |
| wavelet-LHH_firstorder_Energy                                | 1,32529 | 0,241658 | 0,250161 | n.s. |
| wavelet-LHL_firstorder_Mean                                  | 1,31419 | 0,252052 | 0,26068  | n.s. |
| wavelet-HLH_gldm_SmallDependenceLowGrayLevelEmphasis         | 1,31019 | 0,25386  | 0,262306 | n.s. |
| wavelet-LHH_firstorder_Median                                | 1,30728 | 0,254833 | 0,263068 | n.s. |
| wavelet-HHL_gldm_LargeDependenceHighGrayLevelEmphasis        | 1,30588 | 0,255804 | 0,263827 | n.s. |
| wavelet-HHL_gldm_Correlation                                 | 1,29508 | 0,260713 | 0,268643 | n.s. |
| wavelet-LLL_gldm_ClusterProminence                           | 1,24368 | 0,280219 | 0,288476 | n.s. |
| wavelet-LLH_gldm_SmallDependenceLowGrayLevelEmphasis         | 1,24003 | 0,287079 | 0,295266 | n.s. |
| wavelet-HLH_firstorder_TotalEnergy                           | 1,18644 | 0,310015 | 0,31827  | n.s. |
| wavelet-HLH_firstorder_Energy                                | 1,18644 | 0,310013 | 0,31827  | n.s. |
| wavelet-LHL_gldm_SmallDependenceLowGrayLevelEmphasis         | 1,18263 | 0,316746 | 0,324883 | n.s. |
| wavelet-HLH_glszm_SizeZoneNonUniformityNormalized            | 1,18108 | 0,317617 | 0,325478 | n.s. |
| log-sigma-5-0-mm-3D_glszm_SmallAreaLowGrayLevelEmphasis      | 1,13544 | 0,342792 | 0,350954 | n.s. |
| wavelet-LLH_gldm_ClusterShade                                | 1,1274  | 0,347447 | 0,355394 | n.s. |
| log-sigma-5-0-mm-3D_gldm_Idmn                                | 1,1089  | 0,358203 | 0,366061 | n.s. |
| wavelet-HHH_gldm_ClusterShade                                | 1,06077 | 0,38679  | 0,394914 | n.s. |
| log-sigma-5-0-mm-3D_gldm_Imc1                                | 1,01437 | 0,416883 | 0,425251 | n.s. |
| wavelet-HLH_firstorder_Skewness                              | 0,97381 | 0,443925 | 0,452423 | n.s. |
| original_firstorder_Minimum                                  | 0,9661  | 0,449193 | 0,457375 | n.s. |
| wavelet-HHH_gldm_SmallDependenceLowGrayLevelEmphasis         | 0,96383 | 0,450744 | 0,458537 | n.s. |
| wavelet-HHH_gldm_LongRunHighGrayLevelEmphasis                | 0,95974 | 0,453373 | 0,460792 | n.s. |
| wavelet-HHH_firstorder_Mean                                  | 0,95804 | 0,454725 | 0,461746 | n.s. |
| wavelet-HHH_glszm_SmallAreaEmphasis                          | 0,95143 | 0,459148 | 0,465814 | n.s. |
| wavelet-HHH_gldm_Idmn                                        | 0,94396 | 0,464511 | 0,470828 | n.s. |
| wavelet-LLH_gldm_LargeDependenceHighGrayLevelEmphasis        | 0,90516 | 0,492065 | 0,498305 | n.s. |
| log-sigma-3-0-mm-3D_firstorder_Skewness                      | 0,88488 | 0,506843 | 0,512806 | n.s. |
| log-sigma-2-0-mm-3D_firstorder_Skewness                      | 0,84949 | 0,533107 | 0,538891 | n.s. |
| wavelet-HHL_gldm_ClusterShade                                | 0,7537  | 0,607061 | 0,613093 | n.s. |
| wavelet-HHH_firstorder_Skewness                              | 0,7389  | 0,618823 | 0,624408 | n.s. |
| log-sigma-4-0-mm-3D_gldm_Imc1                                | 0,73398 | 0,622764 | 0,627818 | n.s. |
| wavelet-HHH_gldm_LargeDependenceHighGrayLevelEmphasis        | 0,698   | 0,651491 | 0,656186 | n.s. |
| wavelet-HHH_gldm_DependenceNonUniformityNormalized           | 0,64126 | 0,697132 | 0,701525 | n.s. |
| wavelet-LHH_firstorder_Mean                                  | 0,6255  | 0,709778 | 0,713608 | n.s. |
| wavelet-HLH_gldm_ClusterShade                                | 0,60843 | 0,723459 | 0,726709 | n.s. |
| wavelet-LHH_gldm_SmallDependenceLowGrayLevelEmphasis         | 0,489   | 0,816172 | 0,819103 | n.s. |
| wavelet-HHL_firstorder_Median                                | 0,43442 | 0,855515 | 0,857817 | n.s. |
| wavelet-LHH_firstorder_RootMeanSquared                       | 0,41979 | 0,865376 | 0,866927 | n.s. |
| wavelet-LHH_gldm_LongRunHighGrayLevelEmphasis                | 0,32199 | 0,925015 | 0,925843 | n.s. |

|                                     |         |          |          |      |
|-------------------------------------|---------|----------|----------|------|
| wavelet-HHH_gldm_DependenceVariance | 0,26616 | 0,952187 | 0,952187 | n.s. |
|-------------------------------------|---------|----------|----------|------|
