# Supplementary material for: Contrast Agent Dynamics Determine Radiomics Profiles in Oncologic Imaging
Source: MDPI journal article supplement (doi:10.3390/cancers16081519), 2024-04-16
Supplement: s1 [file s1]

**Table S1: Linear mixed model p values and cluster membership of all CT radiomics features for prostate parenchyma**

| Feature                                                       | F value  | p value  | FDR      | Cluster |
|---------------------------------------------------------------|----------|----------|----------|---------|
| wavelet.LLL_firstorder_Mean                                   | 25,88065 | 1,13E-11 | 3,4E-09  | 1       |
| wavelet.LLL_firstorder_RootMeanSquared                        | 25,87682 | 1,13E-11 | 3,4E-09  | 1       |
| original_firstorder_Mean                                      | 25,89841 | 1,11E-11 | 3,4E-09  | 1       |
| original_firstorder_RootMeanSquared                           | 25,87986 | 1,13E-11 | 3,4E-09  | 1       |
| original_firstorder_Energy                                    | 9,792666 | 8,05E-11 | 1,38E-08 | 1       |
| original_firstorder_Median                                    | 23,04962 | 5,75E-11 | 1,38E-08 | 1       |
| original_firstorder_TotalEnergy                               | 9,792666 | 8,05E-11 | 1,38E-08 | 1       |
| wavelet.LLL_firstorder_Energy                                 | 9,662352 | 1,16E-10 | 1,55E-08 | 1       |
| wavelet.LLL_firstorder_TotalEnergy                            | 9,662352 | 1,16E-10 | 1,55E-08 | 1       |
| wavelet.LLL_firstorder_Median                                 | 20,16553 | 3,58E-10 | 4,31E-08 | 1       |
| wavelet.LLL_firstorder_90Percentile                           | 17,41994 | 2,46E-09 | 2,7E-07  | 1       |
| original_firstorder_90Percentile                              | 17,11097 | 3,1E-09  | 3,11E-07 | 1       |
| wavelet.LLL_firstorder_10Percentile                           | 14,73152 | 2,03E-08 | 1,75E-06 | 1       |
| original_firstorder_10Percentile                              | 14,773   | 1,96E-08 | 1,75E-06 | 1       |
| wavelet.LLL_firstorder_Maximum                                | 12,93112 | 9,69E-08 | 7,78E-06 | 1       |
| original_firstorder_Maximum                                   | 9,275476 | 3,71E-06 | 0,000279 | 1       |
| wavelet.HLH_firstorder_InterquartileRange                     | 7,483071 | 2,98E-05 | 0,002111 | 1       |
| wavelet.LLL_glszm_GrayLevelNonUniformityNormalized            | 5,673845 | 0,000314 | 0,021011 | 2       |
| wavelet.HLH_firstorder_RobustMeanAbsoluteDeviation            | 5,209451 | 0,000602 | 0,038163 | 1       |
| log.sigma.4.0.mm.3D_gldm_LargeDependenceEmphasis              | 4,936225 | 0,000892 | 0,051121 | n.s.    |
| log.sigma.5.0.mm.3D_glrlm_RunLengthNonUniformityNormalized    | 4,939578 | 0,000887 | 0,051121 | n.s.    |
| log.sigma.4.0.mm.3D_glcm_SumSquares                           | 4,689768 | 0,001278 | 0,069947 | n.s.    |
| log.sigma.4.0.mm.3D_glrlm_RunPercentage                       | 4,586181 | 0,00149  | 0,077418 | n.s.    |
| log.sigma.4.0.mm.3D_glcm_Id                                   | 4,458872 | 0,0018   | 0,077418 | n.s.    |
| log.sigma.4.0.mm.3D_glcm_DifferenceAverage                    | 4,458872 | 0,0018   | 0,077418 | n.s.    |
| log.sigma.4.0.mm.3D_glcm_InverseVariance                      | 4,458872 | 0,0018   | 0,077418 | n.s.    |
| log.sigma.4.0.mm.3D_glcm_Contrast                             | 4,458872 | 0,0018   | 0,077418 | n.s.    |
| log.sigma.4.0.mm.3D_glcm_Idm                                  | 4,458872 | 0,0018   | 0,077418 | n.s.    |
| log.sigma.4.0.mm.3D_glcm_ClusterTendency                      | 4,373946 | 0,002045 | 0,084897 | n.s.    |
| log.sigma.4.0.mm.3D_gldm_DependenceEntropy                    | 4,308149 | 0,002258 | 0,087694 | n.s.    |
| original_glszm_GrayLevelVariance                              | 4,325923 | 0,002198 | 0,087694 | n.s.    |
| log.sigma.1.0.mm.3D_gldm_SmallDependenceHighGrayLevelEmphasis | 4,251836 | 0,002459 | 0,092505 | n.s.    |
| log.sigma.4.0.mm.3D_glcm_DifferenceVariance                   | 4,205982 | 0,002636 | 0,096164 | n.s.    |
| wavelet.HLH_firstorder_MeanAbsoluteDeviation                  | 4,165317 | 0,002804 | 0,099292 | n.s.    |
| log.sigma.4.0.mm.3D_glcm_JointEntropy                         | 4,130661 | 0,002956 | 0,101689 | n.s.    |
| log.sigma.4.0.mm.3D_glcm_JointEnergy                          | 4,060907 | 0,003289 | 0,10519  | n.s.    |
| log.sigma.4.0.mm.3D_glcm_SumEntropy                           | 4,071058 | 0,003238 | 0,10519  | n.s.    |
| log.sigma.4.0.mm.3D_gldm_GrayLevelVariance                    | 4,054789 | 0,00332  | 0,10519  | n.s.    |
| wavelet.HLL_glrlm_GrayLevelNonUniformity                      | 3,98586  | 0,003691 | 0,113404 | n.s.    |
| log.sigma.5.0.mm.3D_glrlm_RunPercentage                       | 3,972527 | 0,003768 | 0,113404 | n.s.    |
| log.sigma.4.0.mm.3D_glcm_MaximumProbability                   | 3,87829  | 0,004358 | 0,113557 | n.s.    |

|                                                               |          |          |          |      |
|---------------------------------------------------------------|----------|----------|----------|------|
| log.sigma.5.0.mm.3D_glcml_Id                                  | 3,867365 | 0,004433 | 0,113557 | n.s. |
| log.sigma.5.0.mm.3D_glcml_DifferenceAverage                   | 3,867365 | 0,004433 | 0,113557 | n.s. |
| log.sigma.5.0.mm.3D_glcml_InverseVariance                     | 3,867365 | 0,004433 | 0,113557 | n.s. |
| log.sigma.5.0.mm.3D_glcml_Contrast                            | 3,867365 | 0,004433 | 0,113557 | n.s. |
| log.sigma.5.0.mm.3D_glcml_Idm                                 | 3,867365 | 0,004433 | 0,113557 | n.s. |
| log.sigma.5.0.mm.3D_gldm_LargeDependenceEmphasis              | 3,949861 | 0,003902 | 0,113557 | n.s. |
| log.sigma.1.0.mm.3D_glcml_JointAverage                        | 3,81782  | 0,004787 | 0,113702 | n.s. |
| log.sigma.1.0.mm.3D_glcml_Autocorrelation                     | 3,818267 | 0,004784 | 0,113702 | n.s. |
| log.sigma.1.0.mm.3D_gldm_HighGrayLevelEmphasis                | 3,813968 | 0,004816 | 0,113702 | n.s. |
| log.sigma.4.0.mm.3D_glcml_DifferenceEntropy                   | 3,820403 | 0,004768 | 0,113702 | n.s. |
| wavelet.LLL_firstorder_Range                                  | 3,786235 | 0,005029 | 0,116438 | n.s. |
| log.sigma.1.0.mm.3D_glrml_HighGrayLevelRunEmphasis            | 3,696231 | 0,005788 | 0,131495 | n.s. |
| log.sigma.4.0.mm.3D_glrml_LongRunEmphasis                     | 3,672535 | 0,006008 | 0,133945 | n.s. |
| log.sigma.1.0.mm.3D_glrml_LongRunHighGrayLevelEmphasis        | 3,647424 | 0,006249 | 0,134356 | n.s. |
| log.sigma.5.0.mm.3D_glcml_DifferenceVariance                  | 3,656897 | 0,006157 | 0,134356 | n.s. |
| log.sigma.1.0.mm.3D_firstorder_Minimum                        | 3,619864 | 0,006526 | 0,137845 | n.s. |
| log.sigma.5.0.mm.3D_glrml_ShortRunEmphasis                    | 3,596939 | 0,006766 | 0,140449 | n.s. |
| wavelet.HLL_gldm_GrayLevelNonUniformity                       | 3,552466 | 0,007258 | 0,148104 | n.s. |
| log.sigma.4.0.mm.3D_glcml_Idn                                 | 3,503642 | 0,00784  | 0,15733  | n.s. |
| log.sigma.1.0.mm.3D_glrml_ShortRunHighGrayLevelEmphasis       | 3,48899  | 0,008025 | 0,157359 | n.s. |
| log.sigma.1.0.mm.3D_glszm_SmallAreaHighGrayLevelEmphasis      | 3,474763 | 0,008208 | 0,157359 | n.s. |
| log.sigma.4.0.mm.3D_firstorder_Uniformity                     | 3,47275  | 0,008234 | 0,157359 | n.s. |
| log.sigma.1.0.mm.3D_gldm_LargeDependenceHighGrayLevelEmphasis | 3,44166  | 0,008651 | 0,16274  | n.s. |
| wavelet.HLL_glcml_SumEntropy                                  | 3,306664 | 0,010729 | 0,187304 | n.s. |
| log.sigma.4.0.mm.3D_firstorder_Entropy                        | 3,333523 | 0,010278 | 0,187304 | n.s. |
| log.sigma.5.0.mm.3D_glcml_DifferenceEntropy                   | 3,31108  | 0,010653 | 0,187304 | n.s. |
| original_firstorder_Range                                     | 3,306364 | 0,010734 | 0,187304 | n.s. |
| original_glszm_GrayLevelNonUniformityNormalized               | 3,315033 | 0,010586 | 0,187304 | n.s. |
| log.sigma.5.0.mm.3D_glrml_RunLengthNonUniformity              | 3,250263 | 0,011744 | 0,202001 | n.s. |
| wavelet.LLH_gldm_DependenceVariance                           | 3,217032 | 0,012388 | 0,210076 | n.s. |
| wavelet.HLL_glcml_JointEntropy                                | 3,194107 | 0,012854 | 0,214941 | n.s. |
| log.sigma.4.0.mm.3D_glrml_RunLengthNonUniformity              | 3,17184  | 0,013323 | 0,216903 | n.s. |
| log.sigma.5.0.mm.3D_firstorder_Range                          | 3,171452 | 0,013331 | 0,216903 | n.s. |
| wavelet.HLL_glcml_ClusterTendency                             | 3,14785  | 0,013848 | 0,222312 | n.s. |
| wavelet.HLH_firstorder_90Percentile                           | 3,128591 | 0,014286 | 0,226313 | n.s. |
| wavelet.LLL_glrml_RunLengthNonUniformity                      | 3,055497 | 0,016078 | 0,251405 | n.s. |
| wavelet.HLL_firstorder_10Percentile                           | 2,760809 | 0,025992 | 0,284181 | n.s. |
| wavelet.HLL_firstorder_Uniformity                             | 2,893837 | 0,020911 | 0,284181 | n.s. |
| wavelet.HLL_firstorder_Entropy                                | 2,857047 | 0,022205 | 0,284181 | n.s. |
| wavelet.HLL_glrml_GrayLevelVariance                           | 2,756606 | 0,026171 | 0,284181 | n.s. |
| wavelet.HLL_glrml_GrayLevelNonUniformityNormalized            | 2,755764 | 0,026207 | 0,284181 | n.s. |
| wavelet.HLL_glcml_JointEnergy                                 | 2,885926 | 0,021182 | 0,284181 | n.s. |
| wavelet.HLL_glcml_DifferenceEntropy                           | 2,865818 | 0,021889 | 0,284181 | n.s. |
| wavelet.HLL_glcml_MaximumProbability                          | 2,757697 | 0,026124 | 0,284181 | n.s. |
| wavelet.HLL_glcml_SumSquares                                  | 2,90321  | 0,020594 | 0,284181 | n.s. |
| wavelet.HLL_gldm_GrayLevelVariance                            | 2,850029 | 0,022461 | 0,284181 | n.s. |

|                                                              |          |          |          |      |
|--------------------------------------------------------------|----------|----------|----------|------|
| wavelet.HLH_firstorder_Variance                              | 2,84701  | 0,022572 | 0,284181 | n.s. |
| wavelet.HLH_glrlm_LongRunEmphasis                            | 2,77881  | 0,025236 | 0,284181 | n.s. |
| wavelet.HLH_glszm_SmallAreaHighGrayLevelEmphasis             | 2,850567 | 0,022441 | 0,284181 | n.s. |
| wavelet.HHH_firstorder_10Percentile                          | 2,803658 | 0,02423  | 0,284181 | n.s. |
| wavelet.HHH_firstorder_90Percentile                          | 2,739684 | 0,026908 | 0,284181 | n.s. |
| wavelet.LLL_glszm_GrayLevelVariance                          | 2,748519 | 0,026521 | 0,284181 | n.s. |
| wavelet.LLL_glszm_SmallAreaHighGrayLevelEmphasis             | 2,910301 | 0,020357 | 0,284181 | n.s. |
| wavelet.LLL_gldm_SmallDependenceEmphasis                     | 2,951959 | 0,019022 | 0,284181 | n.s. |
| log.sigma.1.0.mm.3D_firstorder_Median                        | 2,95246  | 0,019006 | 0,284181 | n.s. |
| log.sigma.1.0.mm.3D_firstorder_Range                         | 2,792134 | 0,024692 | 0,284181 | n.s. |
| log.sigma.1.0.mm.3D_glrlm_LongRunLowGrayLevelEmphasis        | 2,94359  | 0,019282 | 0,284181 | n.s. |
| log.sigma.1.0.mm.3D_glszm_SizeZoneNonUniformity              | 2,744188 | 0,026709 | 0,284181 | n.s. |
| log.sigma.1.0.mm.3D_glszm_LargeAreaLowGrayLevelEmphasis      | 2,84768  | 0,022547 | 0,284181 | n.s. |
| log.sigma.1.0.mm.3D_gldm_SmallDependenceEmphasis             | 2,744906 | 0,026678 | 0,284181 | n.s. |
| log.sigma.2.0.mm.3D_firstorder_Maximum                       | 2,765667 | 0,025785 | 0,284181 | n.s. |
| log.sigma.4.0.mm.3D_glrlm_RunVariance                        | 2,836853 | 0,02295  | 0,284181 | n.s. |
| log.sigma.4.0.mm.3D_glrlm_ShortRunHighGrayLevelEmphasis      | 2,74866  | 0,026514 | 0,284181 | n.s. |
| log.sigma.4.0.mm.3D_glcm_lmc2                                | 2,764713 | 0,025826 | 0,284181 | n.s. |
| log.sigma.4.0.mm.3D_gldm_DependenceNonUniformityNormalized   | 2,902776 | 0,020608 | 0,284181 | n.s. |
| log.sigma.5.0.mm.3D_glrlm_ShortRunHighGrayLevelEmphasis      | 2,867676 | 0,021823 | 0,284181 | n.s. |
| log.sigma.5.0.mm.3D_glrlm_GrayLevelVariance                  | 2,796085 | 0,024532 | 0,284181 | n.s. |
| log.sigma.5.0.mm.3D_glcm_lcn                                 | 2,843063 | 0,022718 | 0,284181 | n.s. |
| log.sigma.5.0.mm.3D_glcm_JointEntropy                        | 2,908441 | 0,020419 | 0,284181 | n.s. |
| log.sigma.5.0.mm.3D_glcm_SumEntropy                          | 2,81319  | 0,023855 | 0,284181 | n.s. |
| log.sigma.5.0.mm.3D_glcm_SumSquares                          | 2,767398 | 0,025712 | 0,284181 | n.s. |
| log.sigma.5.0.mm.3D_glszm_GrayLevelVariance                  | 2,948715 | 0,019122 | 0,284181 | n.s. |
| log.sigma.5.0.mm.3D_gldm_GrayLevelVariance                   | 2,7604   | 0,026009 | 0,284181 | n.s. |
| wavelet.LLL_glszm_HighGrayLevelZoneEmphasis                  | 2,725526 | 0,02754  | 0,286431 | n.s. |
| log.sigma.1.0.mm.3D_gldm_LargeDependenceLowGrayLevelEmphasis | 2,724276 | 0,027596 | 0,286431 | n.s. |
| wavelet.LLL_glrlm_LongRunEmphasis                            | 2,712268 | 0,028146 | 0,28718  | n.s. |
| log.sigma.2.0.mm.3D_glszm_SizeZoneNonUniformity              | 2,71229  | 0,028145 | 0,28718  | n.s. |
| wavelet.HLL_firstorder_MeanAbsoluteDeviation                 | 2,705428 | 0,028463 | 0,287983 | n.s. |
| wavelet.HLL_glrlm_RunEntropy                                 | 2,694232 | 0,028992 | 0,290882 | n.s. |
| wavelet.HLL_firstorder_Variance                              | 2,665985 | 0,030369 | 0,294872 | n.s. |
| wavelet.HLL_glszm_GrayLevelNonUniformityNormalized           | 2,679694 | 0,029692 | 0,294872 | n.s. |
| log.sigma.1.0.mm.3D_glszm_HighGrayLevelZoneEmphasis          | 2,675832 | 0,029881 | 0,294872 | n.s. |
| log.sigma.5.0.mm.3D_glszm_HighGrayLevelZoneEmphasis          | 2,668599 | 0,030239 | 0,294872 | n.s. |
| wavelet.LLL_glrlm_RunVariance                                | 2,648932 | 0,031232 | 0,300831 | n.s. |
| wavelet.HLL_glcm_DifferenceVariance                          | 2,634356 | 0,03199  | 0,305686 | n.s. |
| log.sigma.5.0.mm.3D_firstorder_Entropy                       | 2,614958 | 0,033028 | 0,313117 | n.s. |
| wavelet.HLH_glrlm_RunVariance                                | 2,591737 | 0,034316 | 0,32278  | n.s. |
| wavelet.HLL_glrlm_RunVariance                                | 2,553898 | 0,036523 | 0,334939 | n.s. |
| wavelet.HLL_glcm_DifferenceAverage                           | 2,544609 | 0,037087 | 0,334939 | n.s. |
| log.sigma.4.0.mm.3D_glrlm_RunLengthNonUniformityNormalized   | 2,559612 | 0,036181 | 0,334939 | n.s. |
| log.sigma.5.0.mm.3D_glrlm_GrayLevelNonUniformityNormalized   | 2,558774 | 0,036231 | 0,334939 | n.s. |
| log.sigma.5.0.mm.3D_glcm_ClusterTendency                     | 2,549493 | 0,03679  | 0,334939 | n.s. |

|                                                              |          |          |          |      |
|--------------------------------------------------------------|----------|----------|----------|------|
| log.sigma.5.0.mm.3D_gldm_SmallDependenceLowGrayLevelEmphasis | 2,541509 | 0,037277 | 0,334939 | n.s. |
| log.sigma.5.0.mm.3D_gldm_DependenceEntropy                   | 2,536378 | 0,037594 | 0,335283 | n.s. |
| wavelet.LLH_gldm_DependenceNonUniformity                     | 2,52196  | 0,038499 | 0,340828 | n.s. |
| wavelet.LLL_gldm_SmallDependenceHighGrayLevelEmphasis        | 2,515159 | 0,038933 | 0,342159 | n.s. |
| wavelet.HLL_firstorder_RobustMeanAbsoluteDeviation           | 2,505927 | 0,039531 | 0,344894 | n.s. |
| log.sigma.5.0.mm.3D_gldm_JointEnergy                         | 2,498144 | 0,040042 | 0,34684  | n.s. |
| wavelet.LLL_glszm_SizeZoneNonUniformity                      | 2,486301 | 0,040833 | 0,351086 | n.s. |
| log.sigma.1.0.mm.3D_glszm_GrayLevelNonUniformityNormalized   | 2,48212  | 0,041116 | 0,351086 | n.s. |
| wavelet.HLH_firstorder_10Percentile                          | 2,473718 | 0,04169  | 0,353484 | n.s. |
| wavelet.HLL_gldm_Contrast                                    | 2,468983 | 0,042017 | 0,353768 | n.s. |
| wavelet.HHH_firstorder_RobustMeanAbsoluteDeviation           | 2,449872 | 0,043365 | 0,357946 | n.s. |
| wavelet.LLL_gldm_ShortRunHighGrayLevelEmphasis               | 2,452691 | 0,043163 | 0,357946 | n.s. |
| log.sigma.3.0.mm.3D_firstorder_Maximum                       | 2,449306 | 0,043405 | 0,357946 | n.s. |
| wavelet.HLL_firstorder_90Percentile                          | 2,388066 | 0,048029 | 0,359175 | n.s. |
| wavelet.HLL_gldm_RunLengthNonUniformity                      | 2,433813 | 0,044531 | 0,359175 | n.s. |
| wavelet.HLL_gldm_Id                                          | 2,390652 | 0,047824 | 0,359175 | n.s. |
| wavelet.HLL_gldm_Idm                                         | 2,401655 | 0,046962 | 0,359175 | n.s. |
| wavelet.HHH_firstorder_InterquartileRange                    | 2,440907 | 0,044012 | 0,359175 | n.s. |
| wavelet.HHH_firstorder_MeanAbsoluteDeviation                 | 2,397753 | 0,047266 | 0,359175 | n.s. |
| wavelet.LLL_gldm_ShortRunEmphasis                            | 2,412536 | 0,046125 | 0,359175 | n.s. |
| wavelet.LLL_gldm_HighGrayLevelRunEmphasis                    | 2,394456 | 0,047524 | 0,359175 | n.s. |
| wavelet.LLL_gldm_DependenceNonUniformity                     | 2,399557 | 0,047125 | 0,359175 | n.s. |
| log.sigma.1.0.mm.3D_glszm_SmallAreaEmphasis                  | 2,411242 | 0,046224 | 0,359175 | n.s. |
| log.sigma.1.0.mm.3D_gldm_GrayLevelNonUniformity              | 2,416003 | 0,045861 | 0,359175 | n.s. |
| log.sigma.1.0.mm.3D_gldm_LowGrayLevelEmphasis                | 2,416635 | 0,045813 | 0,359175 | n.s. |
| log.sigma.3.0.mm.3D_firstorder_Range                         | 2,396819 | 0,047339 | 0,359175 | n.s. |
| log.sigma.4.0.mm.3D_gldm_Idmn                                | 2,397846 | 0,047259 | 0,359175 | n.s. |
| log.sigma.5.0.mm.3D_gldm_RunEntropy                          | 2,433068 | 0,044586 | 0,359175 | n.s. |
| wavelet.LHH_firstorder_Skewness                              | 2,375611 | 0,049029 | 0,361978 | n.s. |
| wavelet.LHH_firstorder_Median                                | 2,329856 | 0,049498 | 0,361978 | n.s. |
| wavelet.LLL_gldm_HighGrayLevelEmphasis                       | 2,368526 | 0,049607 | 0,361978 | n.s. |
| log.sigma.1.0.mm.3D_gldm_LowGrayLevelRunEmphasis             | 2,372359 | 0,049293 | 0,361978 | n.s. |
| log.sigma.3.0.mm.3D_gldm_LongRunLowGrayLevelEmphasis         | 2,352229 | 0,050962 | 0,369629 | n.s. |
| wavelet.HHL_glszm_LowGrayLevelZoneEmphasis                   | 2,338892 | 0,052099 | 0,375612 | n.s. |
| log.sigma.4.0.mm.3D_gldm_GrayLevelVariance                   | 2,331732 | 0,05272  | 0,377826 | n.s. |
| wavelet.HLL_glszm_ZoneVariance                               | 2,326973 | 0,053137 | 0,378514 | n.s. |
| log.sigma.3.0.mm.3D_gldm_Imc2                                | 2,32348  | 0,053445 | 0,378514 | n.s. |
| wavelet.HLH_glszm_SmallAreaEmphasis                          | 2,315225 | 0,05418  | 0,381476 | n.s. |
| wavelet.LLL_gldm_Autocorrelation                             | 2,309143 | 0,054728 | 0,383095 | n.s. |
| wavelet.LHL_gldm_RunLengthNonUniformity                      | 2,286827 | 0,056787 | 0,388474 | n.s. |
| wavelet.HLL_glszm_ZoneEntropy                                | 2,291011 | 0,056395 | 0,388474 | n.s. |
| log.sigma.1.0.mm.3D_gldm_ShortRunLowGrayLevelEmphasis        | 2,294758 | 0,056046 | 0,388474 | n.s. |
| log.sigma.4.0.mm.3D_gldm_ShortRunEmphasis                    | 2,289208 | 0,056563 | 0,388474 | n.s. |
| wavelet.LHL_gldm_DependenceNonUniformity                     | 2,270012 | 0,058389 | 0,392743 | n.s. |
| wavelet.HLL_gldm_LongRunEmphasis                             | 2,275358 | 0,057875 | 0,392743 | n.s. |
| wavelet.LLL_gldm_RunPercentage                               | 2,270138 | 0,058377 | 0,392743 | n.s. |

|                                                              |          |          |          |      |
|--------------------------------------------------------------|----------|----------|----------|------|
| wavelet.HLL_glcm_ClusterProminence                           | 2,219843 | 0,063445 | 0,393213 | n.s. |
| wavelet.HLL_glszm_LargeAreaEmphasis                          | 2,236068 | 0,061764 | 0,393213 | n.s. |
| wavelet.HLH_firstorder_Kurtosis                              | 2,238606 | 0,061505 | 0,393213 | n.s. |
| wavelet.HLH_glszm_LowGrayLevelZoneEmphasis                   | 2,265632 | 0,058814 | 0,393213 | n.s. |
| wavelet.HHH_firstorder_Kurtosis                              | 2,247702 | 0,060586 | 0,393213 | n.s. |
| wavelet.LLL_glrlm_RunLengthNonUniformityNormalized           | 2,221262 | 0,063296 | 0,393213 | n.s. |
| log.sigma.1.0.mm.3D_firstorder_90Percentile                  | 2,219749 | 0,063455 | 0,393213 | n.s. |
| log.sigma.1.0.mm.3D_glrlm_GrayLevelNonUniformity             | 2,217565 | 0,063685 | 0,393213 | n.s. |
| log.sigma.2.0.mm.3D_glrlm_LongRunEmphasis                    | 2,221081 | 0,063315 | 0,393213 | n.s. |
| log.sigma.3.0.mm.3D_glszm_SmallAreaLowGrayLevelEmphasis      | 2,242618 | 0,061098 | 0,393213 | n.s. |
| log.sigma.3.0.mm.3D_gldm_LargeDependenceLowGrayLevelEmphasis | 2,231864 | 0,062195 | 0,393213 | n.s. |
| log.sigma.4.0.mm.3D_gldm_GrayLevelNonUniformity              | 2,245492 | 0,060808 | 0,393213 | n.s. |
| log.sigma.5.0.mm.3D_firstorder_Uniformity                    | 2,227863 | 0,062609 | 0,393213 | n.s. |
| original_firstorder_Minimum                                  | 2,220017 | 0,063427 | 0,393213 | n.s. |
| original_glrlm_RunEntropy                                    | 2,261111 | 0,059256 | 0,393213 | n.s. |
| original_gldm_GrayLevelNonUniformity                         | 2,232815 | 0,062097 | 0,393213 | n.s. |
| log.sigma.4.0.mm.3D_glrlm_LongRunLowGrayLevelEmphasis        | 2,209092 | 0,064584 | 0,396732 | n.s. |
| log.sigma.4.0.mm.3D_glrlm_GrayLevelNonUniformityNormalized   | 2,201352 | 0,065417 | 0,399808 | n.s. |
| log.sigma.5.0.mm.3D_glcm_MaximumProbability                  | 2,194971 | 0,066112 | 0,399992 | n.s. |
| log.sigma.5.0.mm.3D_glcm_Correlation                         | 2,195333 | 0,066072 | 0,399992 | n.s. |
| log.sigma.4.0.mm.3D_firstorder_Range                         | 2,182678 | 0,06747  | 0,405606 | n.s. |
| log.sigma.5.0.mm.3D_glcm_Imc2                                | 2,180508 | 0,067713 | 0,405606 | n.s. |
| original_glszm_GrayLevelNonUniformity                        | 2,164161 | 0,06957  | 0,414666 | n.s. |
| wavelet.HLH_glszm_HighGrayLevelZoneEmphasis                  | 2,156074 | 0,070507 | 0,418182 | n.s. |
| wavelet.HLH_firstorder_Mean                                  | 2,11543  | 0,071537 | 0,422211 | n.s. |
| wavelet.HLL_glrlm_RunPercentage                              | 2,133671 | 0,07317  | 0,427654 | n.s. |
| wavelet.LLL_glcm_JointEntropy                                | 2,135333 | 0,072969 | 0,427654 | n.s. |
| log.sigma.5.0.mm.3D_glrlm_LongRunLowGrayLevelEmphasis        | 2,124913 | 0,074238 | 0,431799 | n.s. |
| wavelet.LLL_glrlm_LongRunHighGrayLevelEmphasis               | 2,118047 | 0,075086 | 0,434632 | n.s. |
| wavelet.HLL_gldm_LargeDependenceEmphasis                     | 2,101832 | 0,077127 | 0,44431  | n.s. |
| wavelet.LLL_glcm_JointAverage                                | 2,096107 | 0,077861 | 0,446401 | n.s. |
| log.sigma.2.0.mm.3D_glrlm_RunLengthNonUniformity             | 2,089963 | 0,078656 | 0,446705 | n.s. |
| log.sigma.3.0.mm.3D_glcm_Correlation                         | 2,090967 | 0,078525 | 0,446705 | n.s. |
| wavelet.HLH_firstorder_Skewness                              | 2,077569 | 0,080284 | 0,453813 | n.s. |
| wavelet.HLH_firstorder_RootMeanSquared                       | 2,073686 | 0,080801 | 0,454601 | n.s. |
| original_glrlm_LongRunEmphasis                               | 2,065131 | 0,081952 | 0,458931 | n.s. |
| wavelet.HHL_gldm_SmallDependenceHighGrayLevelEmphasis        | 2,046366 | 0,084533 | 0,469407 | n.s. |
| wavelet.LLH_glrlm_RunVariance                                | 2,042327 | 0,085099 | 0,469407 | n.s. |
| wavelet.HHH_glcm_Imc1                                        | 2,029589 | 0,086909 | 0,469407 | n.s. |
| wavelet.HHH_glszm_GrayLevelNonUniformity                     | 2,027049 | 0,087274 | 0,469407 | n.s. |
| wavelet.HHH_glszm_SizeZoneNonUniformityNormalized            | 2,031486 | 0,086637 | 0,469407 | n.s. |
| wavelet.LLL_glszm_ZoneEntropy                                | 2,029057 | 0,086985 | 0,469407 | n.s. |
| log.sigma.1.0.mm.3D_gldm_DependenceNonUniformity             | 2,043312 | 0,084961 | 0,469407 | n.s. |
| log.sigma.3.0.mm.3D_glszm_LargeAreaLowGrayLevelEmphasis      | 2,026652 | 0,087332 | 0,469407 | n.s. |
| log.sigma.5.0.mm.3D_gldm_LargeDependenceLowGrayLevelEmphasis | 2,038079 | 0,085699 | 0,469407 | n.s. |
| wavelet.LHL_firstorder_Range                                 | 2,013955 | 0,089182 | 0,475112 | n.s. |

|                                                                  |          |          |          |      |
|------------------------------------------------------------------|----------|----------|----------|------|
| log.sigma.4.0.mm.3D_glrlm_HighGrayLevelRunEmphasis               | 2,016436 | 0,088817 | 0,475112 | n.s. |
| log.sigma.5.0.mm.3D_glcmldmn                                     | 2,010354 | 0,089714 | 0,475839 | n.s. |
| wavelet.HHL_firstorder_Maximum                                   | 1,985234 | 0,093512 | 0,488273 | n.s. |
| wavelet.HHL_glcmlcm_Correlation                                  | 1,991744 | 0,092512 | 0,488273 | n.s. |
| wavelet.LHL_gldm_SmallDependenceEmphasis                         | 1,983698 | 0,093749 | 0,488273 | n.s. |
| wavelet.LLL_firstorder_Entropy                                   | 1,972682 | 0,095468 | 0,488273 | n.s. |
| wavelet.LLL_glcmlcm_DifferenceEntropy                            | 1,97533  | 0,095052 | 0,488273 | n.s. |
| wavelet.LLL_gldmlcm_LargeDependenceEmphasis                      | 1,9635   | 0,096925 | 0,488273 | n.s. |
| log.sigma.3.0.mm.3D_glrlm_RunEntropy                             | 1,963511 | 0,096923 | 0,488273 | n.s. |
| log.sigma.3.0.mm.3D_glcmlcm_JointAverage                         | 1,97947  | 0,094405 | 0,488273 | n.s. |
| log.sigma.3.0.mm.3D_gldmlcm_LowGrayLevelEmphasis                 | 1,965003 | 0,096685 | 0,488273 | n.s. |
| log.sigma.3.0.mm.3D_gldmlcm_LargeDependenceHighGrayLevelEmphasis | 1,977075 | 0,094779 | 0,488273 | n.s. |
| log.sigma.5.0.mm.3D_firstorder_Skewness                          | 1,96782  | 0,096237 | 0,488273 | n.s. |
| original_glrlm_RunVariance                                       | 1,98572  | 0,093437 | 0,488273 | n.s. |
| original_firstorder_Entropy                                      | 1,958274 | 0,097763 | 0,490446 | n.s. |
| wavelet.HLL_firstorder_InterquartileRange                        | 1,954774 | 0,098329 | 0,491237 | n.s. |
| log.sigma.2.0.mm.3D_glrlm_ShortRunEmphasis                       | 1,950798 | 0,098976 | 0,492425 | n.s. |
| wavelet.HLH_glszm_ZoneVariance                                   | 1,941887 | 0,10044  | 0,492854 | n.s. |
| wavelet.LLL_glcmlcm_SumEntropy                                   | 1,946567 | 0,099668 | 0,492854 | n.s. |
| log.sigma.4.0.mm.3D_firstorder_MeanAbsoluteDeviation             | 1,937859 | 0,101109 | 0,492854 | n.s. |
| log.sigma.4.0.mm.3D_glcmlcm_ClusterProminence                    | 1,93908  | 0,100905 | 0,492854 | n.s. |
| original_glrlm_RunLengthNonUniformity                            | 1,944524 | 0,100004 | 0,492854 | n.s. |
| log.sigma.1.0.mm.3D_glrlm_RunEntropy                             | 1,934414 | 0,101684 | 0,49366  | n.s. |
| wavelet.LHL_gldmlcm_SmallDependenceHighGrayLevelEmphasis         | 1,923509 | 0,103527 | 0,496411 | n.s. |
| wavelet.LLL_glcmlcm_lcm                                          | 1,928443 | 0,102689 | 0,496411 | n.s. |
| log.sigma.1.0.mm.3D_glszm_GrayLevelVariance                      | 1,921325 | 0,1039   | 0,496411 | n.s. |
| log.sigma.5.0.mm.3D_glszm_GrayLevelNonUniformityNormalized       | 1,922818 | 0,103645 | 0,496411 | n.s. |
| wavelet.HLL_glrlm_RunLengthNonUniformityNormalized               | 1,906733 | 0,106426 | 0,502497 | n.s. |
| wavelet.LLL_glcmlcm_lcm                                          | 1,907456 | 0,106299 | 0,502497 | n.s. |
| log.sigma.3.0.mm.3D_firstorder_Variance                          | 1,906801 | 0,106414 | 0,502497 | n.s. |
| wavelet.LHL_firstorder_Maximum                                   | 1,879182 | 0,111359 | 0,517671 | n.s. |
| wavelet.LHL_glszm_SmallAreaHighGrayLevelEmphasis                 | 1,881502 | 0,110936 | 0,517671 | n.s. |
| wavelet.HHH_firstorder_Variance                                  | 1,881855 | 0,110871 | 0,517671 | n.s. |
| log.sigma.4.0.mm.3D_firstorder_InterquartileRange                | 1,881448 | 0,110945 | 0,517671 | n.s. |
| wavelet.HLL_glrlm_ShortRunEmphasis                               | 1,87077  | 0,11291  | 0,522859 | n.s. |
| wavelet.HHH_glcmlcm_lcm2                                         | 1,867538 | 0,113511 | 0,523629 | n.s. |
| wavelet.LLH_glrlm_LongRunEmphasis                                | 1,855126 | 0,115849 | 0,524368 | n.s. |
| log.sigma.3.0.mm.3D_firstorder_MeanAbsoluteDeviation             | 1,858345 | 0,115238 | 0,524368 | n.s. |
| log.sigma.4.0.mm.3D_firstorder_RobustMeanAbsoluteDeviation       | 1,856136 | 0,115657 | 0,524368 | n.s. |
| log.sigma.4.0.mm.3D_gldmlcm_LargeDependenceLowGrayLevelEmphasis  | 1,856054 | 0,115672 | 0,524368 | n.s. |
| original_firstorder_Skewness                                     | 1,858711 | 0,115169 | 0,524368 | n.s. |
| wavelet.LLL_gldmlcm_GrayLevelNonUniformity                       | 1,851932 | 0,116458 | 0,525151 | n.s. |
| wavelet.LHL_glszm_GrayLevelVariance                              | 1,849318 | 0,116959 | 0,525442 | n.s. |
| wavelet.HHL_glszm_GrayLevelNonUniformity                         | 1,807551 | 0,12525  | 0,528278 | n.s. |
| wavelet.LLH_glrlm_RunLengthNonUniformity                         | 1,823969 | 0,121925 | 0,528278 | n.s. |
| wavelet.HLL_glrlm_HighGrayLevelRunEmphasis                       | 1,804263 | 0,125927 | 0,528278 | n.s. |

|                                                          |          |          |          |      |
|----------------------------------------------------------|----------|----------|----------|------|
| wavelet.HLL_glrIm_ShortRunHighGrayLevelEmphasis          | 1,832981 | 0,120137 | 0,528278 | n.s. |
| wavelet.HLL_glcm_Autocorrelation                         | 1,837663 | 0,119217 | 0,528278 | n.s. |
| wavelet.HLL_gldm_DependenceEntropy                       | 1,815    | 0,123731 | 0,528278 | n.s. |
| wavelet.LLL_glrIm_RunEntropy                             | 1,82421  | 0,121877 | 0,528278 | n.s. |
| log.sigma.1.0.mm.3D_glrIm_GrayLevelVariance              | 1,805634 | 0,125644 | 0,528278 | n.s. |
| log.sigma.1.0.mm.3D_glcm_lmc2                            | 1,808322 | 0,125092 | 0,528278 | n.s. |
| log.sigma.1.0.mm.3D_glszm_LowGrayLevelZoneEmphasis       | 1,813838 | 0,123967 | 0,528278 | n.s. |
| log.sigma.3.0.mm.3D_glrIm_LongRunHighGrayLevelEmphasis   | 1,840934 | 0,118579 | 0,528278 | n.s. |
| log.sigma.3.0.mm.3D_glcm_Autocorrelation                 | 1,831082 | 0,120511 | 0,528278 | n.s. |
| log.sigma.3.0.mm.3D_gldm_HighGrayLevelEmphasis           | 1,813425 | 0,124051 | 0,528278 | n.s. |
| log.sigma.4.0.mm.3D_firstorder_Variance                  | 1,806269 | 0,125514 | 0,528278 | n.s. |
| log.sigma.4.0.mm.3D_glrIm_LowGrayLevelRunEmphasis        | 1,815912 | 0,123546 | 0,528278 | n.s. |
| log.sigma.5.0.mm.3D_glcm_lmc1                            | 1,832645 | 0,120203 | 0,528278 | n.s. |
| log.sigma.5.0.mm.3D_gldm_HighGrayLevelEmphasis           | 1,819334 | 0,122855 | 0,528278 | n.s. |
| original_glcm_SumEntropy                                 | 1,817777 | 0,123169 | 0,528278 | n.s. |
| original_glcm_MaximumProbability                         | 1,83915  | 0,118927 | 0,528278 | n.s. |
| wavelet.LLH_glszm_ZoneEntropy                            | 1,793824 | 0,128098 | 0,529066 | n.s. |
| wavelet.HLL_glcm_JointAverage                            | 1,788404 | 0,129239 | 0,529066 | n.s. |
| wavelet.HLL_gldm_HighGrayLevelEmphasis                   | 1,798507 | 0,127119 | 0,529066 | n.s. |
| log.sigma.1.0.mm.3D_firstorder_Variance                  | 1,784037 | 0,130166 | 0,529066 | n.s. |
| log.sigma.2.0.mm.3D_glcm_DifferenceEntropy               | 1,800156 | 0,126777 | 0,529066 | n.s. |
| log.sigma.3.0.mm.3D_glrIm_LowGrayLevelRunEmphasis        | 1,782512 | 0,130491 | 0,529066 | n.s. |
| log.sigma.4.0.mm.3D_gldm_HighGrayLevelEmphasis           | 1,782427 | 0,130509 | 0,529066 | n.s. |
| log.sigma.5.0.mm.3D_firstorder_Minimum                   | 1,793034 | 0,128263 | 0,529066 | n.s. |
| original_glrIm_GrayLevelNonUniformity                    | 1,787057 | 0,129524 | 0,529066 | n.s. |
| original_gldm_DependenceNonUniformity                    | 1,786592 | 0,129623 | 0,529066 | n.s. |
| wavelet.HLL_glcm_Idmn                                    | 1,773125 | 0,132509 | 0,533582 | n.s. |
| log.sigma.4.0.mm.3D_glrIm_RunEntropy                     | 1,773875 | 0,132347 | 0,533582 | n.s. |
| wavelet.HLL_gldm_SmallDependenceEmphasis                 | 1,77016  | 0,133153 | 0,534388 | n.s. |
| wavelet.LLL_glrIm_GrayLevelNonUniformity                 | 1,764014 | 0,134497 | 0,536373 | n.s. |
| log.sigma.5.0.mm.3D_glrIm_HighGrayLevelRunEmphasis       | 1,762074 | 0,134924 | 0,536373 | n.s. |
| log.sigma.5.0.mm.3D_glcm_Autocorrelation                 | 1,761802 | 0,134984 | 0,536373 | n.s. |
| log.sigma.3.0.mm.3D_glszm_LargeAreaHighGrayLevelEmphasis | 1,622538 | 0,136254 | 0,539638 | n.s. |
| original_glcm_JointEntropy                               | 1,749294 | 0,13777  | 0,543852 | n.s. |
| log.sigma.5.0.mm.3D_firstorder_Median                    | 1,74724  | 0,138232 | 0,543895 | n.s. |
| wavelet.HHL_glszm_LargeAreaLowGrayLevelEmphasis          | 1,744764 | 0,138792 | 0,544318 | n.s. |
| wavelet.LLH_gldm_LargeDependenceEmphasis                 | 1,723358 | 0,143722 | 0,546127 | n.s. |
| wavelet.LLH_gldm_DependenceNonUniformityNormalized       | 1,727018 | 0,142868 | 0,546127 | n.s. |
| wavelet.LHL_glcm_ClusterShade                            | 1,707771 | 0,142971 | 0,546127 | n.s. |
| wavelet.LLL_glcm_JointEnergy                             | 1,73528  | 0,140956 | 0,546127 | n.s. |
| log.sigma.1.0.mm.3D_glcm_ClusterShade                    | 1,73455  | 0,141124 | 0,546127 | n.s. |
| log.sigma.2.0.mm.3D_glrIm_RunVariance                    | 1,729153 | 0,142371 | 0,546127 | n.s. |
| log.sigma.3.0.mm.3D_firstorder_InterquartileRange        | 1,733014 | 0,141478 | 0,546127 | n.s. |
| log.sigma.3.0.mm.3D_glrIm_HighGrayLevelRunEmphasis       | 1,728095 | 0,142617 | 0,546127 | n.s. |
| log.sigma.3.0.mm.3D_glcm_ClusterTendency                 | 1,721139 | 0,144243 | 0,546127 | n.s. |
| log.sigma.5.0.mm.3D_firstorder_Variance                  | 1,722236 | 0,143985 | 0,546127 | n.s. |

|                                                               |          |          |          |      |
|---------------------------------------------------------------|----------|----------|----------|------|
| log.sigma.5.0.mm.3D_gldm_DependenceVariance                   | 1,72658  | 0,14297  | 0,546127 | n.s. |
| log.sigma.3.0.mm.3D_firstorder_RobustMeanAbsoluteDeviation    | 1,713845 | 0,145967 | 0,550922 | n.s. |
| log.sigma.3.0.mm.3D_gldm_Imc1                                 | 1,706597 | 0,147699 | 0,555718 | n.s. |
| wavelet.HLH_glrlm_RunPercentage                               | 1,70314  | 0,148532 | 0,557112 | n.s. |
| log.sigma.1.0.mm.3D_firstorder_Entropy                        | 1,697153 | 0,149986 | 0,560005 | n.s. |
| original_glrlm_GrayLevelVariance                              | 1,696138 | 0,150234 | 0,560005 | n.s. |
| log.sigma.3.0.mm.3D_gldm_GrayLevelNonUniformity               | 1,690746 | 0,151557 | 0,561996 | n.s. |
| log.sigma.5.0.mm.3D_glrlm_LongRunEmphasis                     | 1,690158 | 0,151702 | 0,561996 | n.s. |
| log.sigma.5.0.mm.3D_gldm_JointAverage                         | 1,687933 | 0,152251 | 0,562302 | n.s. |
| wavelet.HHL_glszm_ZonePercentage                              | 1,667178 | 0,15747  | 0,562568 | n.s. |
| wavelet.HLL_gldm_Idn                                          | 1,685474 | 0,152861 | 0,562568 | n.s. |
| wavelet.HLH_gldm_GrayLevelNonUniformity                       | 1,667616 | 0,157358 | 0,562568 | n.s. |
| wavelet.LLL_glszm_ZonePercentage                              | 1,680316 | 0,154147 | 0,562568 | n.s. |
| log.sigma.1.0.mm.3D_gldm_SumEntropy                           | 1,676413 | 0,155127 | 0,562568 | n.s. |
| log.sigma.2.0.mm.3D_gldm_DifferenceVariance                   | 1,665804 | 0,157821 | 0,562568 | n.s. |
| log.sigma.3.0.mm.3D_gldm_DependenceEntropy                    | 1,67119  | 0,156448 | 0,562568 | n.s. |
| log.sigma.4.0.mm.3D_gldm_JointAverage                         | 1,665379 | 0,15793  | 0,562568 | n.s. |
| log.sigma.4.0.mm.3D_gldm_Autocorrelation                      | 1,673089 | 0,155967 | 0,562568 | n.s. |
| log.sigma.4.0.mm.3D_gldm_LowGrayLevelEmphasis                 | 1,668521 | 0,157127 | 0,562568 | n.s. |
| log.sigma.5.0.mm.3D_firstorder_10Percentile                   | 1,680853 | 0,154013 | 0,562568 | n.s. |
| original_firstorder_InterquartileRange                        | 1,671085 | 0,156475 | 0,562568 | n.s. |
| log.sigma.4.0.mm.3D_firstorder_Kurtosis                       | 1,659918 | 0,159335 | 0,565899 | n.s. |
| wavelet.LLH_gldm_ClusterShade                                 | 1,631415 | 0,162412 | 0,568131 | n.s. |
| wavelet.HLL_gldm_DependenceVariance                           | 1,63075  | 0,167042 | 0,568131 | n.s. |
| wavelet.LHH_glszm_LargeAreaLowGrayLevelEmphasis               | 1,648104 | 0,162415 | 0,568131 | n.s. |
| wavelet.HLH_gldm_ClusterProminence                            | 1,632853 | 0,166475 | 0,568131 | n.s. |
| wavelet.HHH_glszm_ZoneEntropy                                 | 1,63779  | 0,16515  | 0,568131 | n.s. |
| wavelet.LLL_glszm_LargeAreaEmphasis                           | 1,635053 | 0,165883 | 0,568131 | n.s. |
| log.sigma.1.0.mm.3D_firstorder_MeanAbsoluteDeviation          | 1,652649 | 0,161224 | 0,568131 | n.s. |
| log.sigma.1.0.mm.3D_glszm_SizeZoneNonUniformityNormalized     | 1,635986 | 0,165633 | 0,568131 | n.s. |
| log.sigma.2.0.mm.3D_glszm_GrayLevelVariance                   | 1,653917 | 0,160893 | 0,568131 | n.s. |
| log.sigma.2.0.mm.3D_gldm_LargeDependenceEmphasis              | 1,648311 | 0,162361 | 0,568131 | n.s. |
| log.sigma.3.0.mm.3D_firstorder_Entropy                        | 1,631886 | 0,166735 | 0,568131 | n.s. |
| log.sigma.3.0.mm.3D_gldm_GrayLevelVariance                    | 1,640078 | 0,16454  | 0,568131 | n.s. |
| log.sigma.5.0.mm.3D_firstorder_MeanAbsoluteDeviation          | 1,633975 | 0,166173 | 0,568131 | n.s. |
| log.sigma.5.0.mm.3D_gldm_SmallDependenceHighGrayLevelEmphasis | 1,642956 | 0,163775 | 0,568131 | n.s. |
| original_firstorder_Variance                                  | 1,636438 | 0,165512 | 0,568131 | n.s. |
| log.sigma.2.0.mm.3D_gldm_InverseVariance                      | 1,628896 | 0,167543 | 0,568232 | n.s. |
| log.sigma.1.0.mm.3D_gldm_Correlation                          | 1,623014 | 0,169144 | 0,57205  | n.s. |
| wavelet.HHL_glszm_HighGrayLevelZoneEmphasis                   | 1,608504 | 0,173155 | 0,572552 | n.s. |
| wavelet.LHL_firstorder_Skewness                               | 1,588503 | 0,174397 | 0,572552 | n.s. |
| wavelet.HLL_gldm_DependenceNonUniformityNormalized            | 1,612146 | 0,17214  | 0,572552 | n.s. |
| wavelet.HLH_gldm_Id                                           | 1,602003 | 0,17498  | 0,572552 | n.s. |
| wavelet.HLH_glszm_SizeZoneNonUniformityNormalized             | 1,602689 | 0,174787 | 0,572552 | n.s. |
| wavelet.HHH_gldm_LargeDependenceLowGrayLevelEmphasis          | 1,605003 | 0,174136 | 0,572552 | n.s. |
| wavelet.LLL_glrlm_GrayLevelVariance                           | 1,601935 | 0,174999 | 0,572552 | n.s. |



|                                                            |          |          |          |      |
|------------------------------------------------------------|----------|----------|----------|------|
| log.sigma.1.0.mm.3D_glrlm_RunLengthNonUniformity           | 1,614877 | 0,171382 | 0,572552 | n.s. |
| log.sigma.2.0.mm.3D_glszm_GrayLevelNonUniformityNormalized | 1,602068 | 0,174962 | 0,572552 | n.s. |
| log.sigma.2.0.mm.3D_gldm_GrayLevelNonUniformity            | 1,612904 | 0,171929 | 0,572552 | n.s. |
| original_firstorder_MeanAbsoluteDeviation                  | 1,611547 | 0,172306 | 0,572552 | n.s. |
| original_glcmm_JointEnergy                                 | 1,605831 | 0,173903 | 0,572552 | n.s. |
| wavelet.LHL_glszm_GrayLevelNonUniformityNormalized         | 1,598925 | 0,175851 | 0,572614 | n.s. |
| wavelet.HLL_glszm_LargeAreaHighGrayLevelEmphasis           | 1,598508 | 0,175969 | 0,572614 | n.s. |
| wavelet.HLL_glrlm_LongRunHighGrayLevelEmphasis             | 1,594176 | 0,177202 | 0,573091 | n.s. |
| log.sigma.1.0.mm.3D_firstorder_Skewness                    | 1,59512  | 0,176933 | 0,573091 | n.s. |
| log.sigma.3.0.mm.3D_glszm_LargeAreaEmphasis                | 1,592981 | 0,177544 | 0,573091 | n.s. |
| log.sigma.1.0.mm.3D_glrlm_LongRunEmphasis                  | 1,590136 | 0,17836  | 0,573229 | n.s. |
| log.sigma.3.0.mm.3D_glcmm_SumSquares                       | 1,589512 | 0,178539 | 0,573229 | n.s. |
| log.sigma.2.0.mm.3D_glrlm_RunPercentage                    | 1,573928 | 0,183074 | 0,586226 | n.s. |
| wavelet.LHL_glrlm_RunVariance                              | 1,546352 | 0,191363 | 0,588587 | n.s. |
| wavelet.LHL_glrlm_LongRunEmphasis                          | 1,536447 | 0,194424 | 0,588587 | n.s. |
| wavelet.LHL_gldm_GrayLevelNonUniformity                    | 1,542786 | 0,19246  | 0,588587 | n.s. |
| wavelet.HLL_firstorder_Minimum                             | 1,556335 | 0,188323 | 0,588587 | n.s. |
| wavelet.HLL_glcmm_Correlation                              | 1,537074 | 0,194229 | 0,588587 | n.s. |
| wavelet.LHH_firstorder_Maximum                             | 1,553599 | 0,189152 | 0,588587 | n.s. |
| wavelet.HLH_firstorder_Energy                              | 1,441025 | 0,194478 | 0,588587 | n.s. |
| wavelet.HLH_firstorder_TotalEnergy                         | 1,441025 | 0,194478 | 0,588587 | n.s. |
| wavelet.HLH_glrlm_GrayLevelNonUniformity                   | 1,543478 | 0,192247 | 0,588587 | n.s. |
| wavelet.HLH_glrlm_RunLengthNonUniformityNormalized         | 1,54742  | 0,191036 | 0,588587 | n.s. |
| wavelet.HLH_glcmm_Idm                                      | 1,545476 | 0,191632 | 0,588587 | n.s. |
| wavelet.HLH_glszm_LargeAreaHighGrayLevelEmphasis           | 1,535993 | 0,194566 | 0,588587 | n.s. |
| wavelet.LLL_glszm_ZoneVariance                             | 1,548268 | 0,190776 | 0,588587 | n.s. |
| wavelet.LLL_gldm_GrayLevelVariance                         | 1,563726 | 0,186101 | 0,588587 | n.s. |
| wavelet.LLL_gldm_LargeDependenceHighGrayLevelEmphasis      | 1,557872 | 0,187859 | 0,588587 | n.s. |
| log.sigma.1.0.mm.3D_glrlm_GrayLevelNonUniformityNormalized | 1,543653 | 0,192193 | 0,588587 | n.s. |
| log.sigma.2.0.mm.3D_firstorder_Range                       | 1,552002 | 0,189637 | 0,588587 | n.s. |
| log.sigma.3.0.mm.3D_firstorder_Uniformity                  | 1,541206 | 0,192948 | 0,588587 | n.s. |
| log.sigma.4.0.mm.3D_glcmm_Imc1                             | 1,550901 | 0,189972 | 0,588587 | n.s. |
| log.sigma.4.0.mm.3D_glszm_GrayLevelVariance                | 1,550066 | 0,190227 | 0,588587 | n.s. |
| original_glcmm_DifferenceEntropy                           | 1,542519 | 0,192542 | 0,588587 | n.s. |
| original_gldm_GrayLevelVariance                            | 1,563938 | 0,186038 | 0,588587 | n.s. |
| wavelet.LHL_glszm_LowGrayLevelZoneEmphasis                 | 1,53232  | 0,195714 | 0,590574 | n.s. |
| wavelet.LLH_firstorder_Energy                              | 1,42438  | 0,200748 | 0,593639 | n.s. |
| wavelet.LLH_firstorder_TotalEnergy                         | 1,42438  | 0,200748 | 0,593639 | n.s. |
| wavelet.LLH_glszm_SmallAreaHighGrayLevelEmphasis           | 1,514375 | 0,201411 | 0,593639 | n.s. |
| wavelet.LHL_glcmm_Imc2                                     | 1,520345 | 0,199499 | 0,593639 | n.s. |
| wavelet.LLL_firstorder_Variance                            | 1,516397 | 0,200761 | 0,593639 | n.s. |
| wavelet.LLL_firstorder_MeanAbsoluteDeviation               | 1,521466 | 0,199142 | 0,593639 | n.s. |
| log.sigma.2.0.mm.3D_glcmm_Id                               | 1,512079 | 0,202151 | 0,593639 | n.s. |
| log.sigma.2.0.mm.3D_glszm_LargeAreaEmphasis                | 1,513532 | 0,201682 | 0,593639 | n.s. |
| log.sigma.3.0.mm.3D_glcmm_SumEntropy                       | 1,515072 | 0,201187 | 0,593639 | n.s. |
| log.sigma.4.0.mm.3D_glrlm_ShortRunLowGrayLevelEmphasis     | 1,521481 | 0,199137 | 0,593639 | n.s. |

|                                                            |          |          |          |      |
|------------------------------------------------------------|----------|----------|----------|------|
| log.sigma.5.0.mm.3D_gldm_DependenceNonUniformityNormalized | 1,512073 | 0,202153 | 0,593639 | n.s. |
| wavelet.LLL_glszm_LargeAreaLowGrayLevelEmphasis            | 1,505284 | 0,204355 | 0,5962   | n.s. |
| log.sigma.1.0.mm.3D_gldm_GrayLevelVariance                 | 1,504808 | 0,204511 | 0,5962   | n.s. |
| log.sigma.5.0.mm.3D_gldm_LowGrayLevelEmphasis              | 1,505663 | 0,204232 | 0,5962   | n.s. |
| wavelet.HHL_firstorder_Entropy                             | 1,498816 | 0,206474 | 0,598238 | n.s. |
| wavelet.HHH_glszm_SmallAreaLowGrayLevelEmphasis            | 1,498129 | 0,2067   | 0,598238 | n.s. |
| original_glrlm_GrayLevelNonUniformityNormalized            | 1,498642 | 0,206531 | 0,598238 | n.s. |
| wavelet.LHL_glszm_ZonePercentage                           | 1,496205 | 0,207335 | 0,598548 | n.s. |
| wavelet.LHL_glszm_LargeAreaEmphasis                        | 1,494795 | 0,207801 | 0,598548 | n.s. |
| log.sigma.2.0.mm.3D_glszm_SmallAreaHighGrayLevelEmphasis   | 1,493024 | 0,208389 | 0,598807 | n.s. |
| log.sigma.2.0.mm.3D_gldm_Idm                               | 1,485554 | 0,210882 | 0,604528 | n.s. |
| wavelet.HHL_glrlm_GrayLevelVariance                        | 1,482399 | 0,211943 | 0,606128 | n.s. |
| wavelet.HHL_firstorder_Uniformity                          | 1,47823  | 0,213353 | 0,607274 | n.s. |
| wavelet.HLL_glszm_LargeAreaLowGrayLevelEmphasis            | 1,479639 | 0,212876 | 0,607274 | n.s. |
| original_glrlm_ShortRunEmphasis                            | 1,470254 | 0,216074 | 0,613569 | n.s. |
| wavelet.HHL_firstorder_90Percentile                        | 1,464951 | 0,217901 | 0,61366  | n.s. |
| wavelet.LHL_glrlm_RunPercentage                            | 1,462775 | 0,218655 | 0,61366  | n.s. |
| wavelet.LHL_glszm_ZoneVariance                             | 1,462868 | 0,218622 | 0,61366  | n.s. |
| wavelet.HLH_gldm_DifferenceAverage                         | 1,464881 | 0,217925 | 0,61366  | n.s. |
| wavelet.LLL_gldm_DifferenceAverage                         | 1,468213 | 0,216776 | 0,61366  | n.s. |
| log.sigma.3.0.mm.3D_gldm_MaximumProbability                | 1,459964 | 0,219632 | 0,614969 | n.s. |
| wavelet.HHH_gldm_LargeDependenceHighGrayLevelEmphasis      | 1,4569   | 0,220701 | 0,615103 | n.s. |
| log.sigma.5.0.mm.3D_gldm_ClusterProminence                 | 1,457691 | 0,220425 | 0,615103 | n.s. |
| wavelet.HHL_firstorder_Range                               | 1,419896 | 0,233997 | 0,616663 | n.s. |
| wavelet.HHL_glrlm_RunLengthNonUniformityNormalized         | 1,399909 | 0,241476 | 0,616663 | n.s. |
| wavelet.HHL_glrlm_GrayLevelNonUniformityNormalized         | 1,447444 | 0,224032 | 0,616663 | n.s. |
| wavelet.HHL_gldm_GrayLevelVariance                         | 1,445594 | 0,224689 | 0,616663 | n.s. |
| wavelet.HHL_gldm_SmallDependenceEmphasis                   | 1,402938 | 0,240329 | 0,616663 | n.s. |
| wavelet.LHL_firstorder_Minimum                             | 1,421258 | 0,233495 | 0,616663 | n.s. |
| wavelet.LHL_glrlm_GrayLevelNonUniformity                   | 1,404691 | 0,239668 | 0,616663 | n.s. |
| wavelet.LHL_gldm_LargeDependenceEmphasis                   | 1,441785 | 0,226047 | 0,616663 | n.s. |
| wavelet.HLL_glszm_GrayLevelVariance                        | 1,409741 | 0,237771 | 0,616663 | n.s. |
| wavelet.HLL_gldm_LargeDependenceHighGrayLevelEmphasis      | 1,409922 | 0,237703 | 0,616663 | n.s. |
| wavelet.HLL_gldm_DependenceNonUniformity                   | 1,413859 | 0,236234 | 0,616663 | n.s. |
| wavelet.HLH_glrlm_ShortRunEmphasis                         | 1,398783 | 0,241904 | 0,616663 | n.s. |
| wavelet.HLH_gldm_JointEnergy                               | 1,446536 | 0,224354 | 0,616663 | n.s. |
| wavelet.HLH_gldm_InverseVariance                           | 1,421718 | 0,233326 | 0,616663 | n.s. |
| wavelet.HLH_gldm_Imc1                                      | 1,396069 | 0,242937 | 0,616663 | n.s. |
| wavelet.HLH_gldm_ClusterTendency                           | 1,441456 | 0,226165 | 0,616663 | n.s. |
| wavelet.HLH_glszm_GrayLevelNonUniformity                   | 1,415133 | 0,23576  | 0,616663 | n.s. |
| wavelet.HLH_glszm_ZoneEntropy                              | 1,416601 | 0,235216 | 0,616663 | n.s. |
| wavelet.HLH_gldm_SmallDependenceHighGrayLevelEmphasis      | 1,39919  | 0,241749 | 0,616663 | n.s. |
| wavelet.HLH_gldm_LargeDependenceEmphasis                   | 1,429023 | 0,230652 | 0,616663 | n.s. |
| wavelet.HHH_glrlm_LongRunLowGrayLevelEmphasis              | 1,4142   | 0,236107 | 0,616663 | n.s. |
| wavelet.HHH_gldm_Idn                                       | 1,446351 | 0,22442  | 0,616663 | n.s. |
| wavelet.HHH_gldm_Idmn                                      | 1,445025 | 0,224892 | 0,616663 | n.s. |

|                                                            |          |          |          |      |
|------------------------------------------------------------|----------|----------|----------|------|
| wavelet.HHH_gldm_SmallDependenceHighGrayLevelEmphasis      | 1,427651 | 0,231152 | 0,616663 | n.s. |
| wavelet.HHH_gldm_DependenceNonUniformityNormalized         | 1,40023  | 0,241355 | 0,616663 | n.s. |
| wavelet.LLL_firstorder_Uniformity                          | 1,395159 | 0,243285 | 0,616663 | n.s. |
| wavelet.LLL_firstorder_Minimum                             | 1,428653 | 0,230787 | 0,616663 | n.s. |
| wavelet.LLL_glrlm_GrayLevelNonUniformityNormalized         | 1,403979 | 0,239936 | 0,616663 | n.s. |
| wavelet.LLL_glcm_DifferenceVariance                        | 1,4383   | 0,227297 | 0,616663 | n.s. |
| wavelet.LLL_glcm_InverseVariance                           | 1,403741 | 0,240026 | 0,616663 | n.s. |
| log.sigma.1.0.mm.3D_firstorder_RootMeanSquared             | 1,406192 | 0,239102 | 0,616663 | n.s. |
| log.sigma.1.0.mm.3D_glcm_JointEntropy                      | 1,43786  | 0,227455 | 0,616663 | n.s. |
| log.sigma.2.0.mm.3D_glrlm_RunLengthNonUniformityNormalized | 1,420513 | 0,23377  | 0,616663 | n.s. |
| log.sigma.2.0.mm.3D_glcm_JointEntropy                      | 1,402199 | 0,240608 | 0,616663 | n.s. |
| log.sigma.2.0.mm.3D_glcm_SumEntropy                        | 1,415192 | 0,235739 | 0,616663 | n.s. |
| log.sigma.2.0.mm.3D_glcm_DifferenceAverage                 | 1,447482 | 0,224019 | 0,616663 | n.s. |
| log.sigma.3.0.mm.3D_glrlm_GrayLevelNonUniformityNormalized | 1,401691 | 0,240801 | 0,616663 | n.s. |
| log.sigma.3.0.mm.3D_glcm_JointEnergy                       | 1,430832 | 0,229995 | 0,616663 | n.s. |
| log.sigma.3.0.mm.3D_glcm_JointEntropy                      | 1,430911 | 0,229966 | 0,616663 | n.s. |
| log.sigma.3.0.mm.3D_glszm_ZoneVariance                     | 1,397194 | 0,242509 | 0,616663 | n.s. |
| log.sigma.4.0.mm.3D_firstorder_10Percentile                | 1,43092  | 0,229962 | 0,616663 | n.s. |
| original_glrlm_RunPercentage                               | 1,434678 | 0,228601 | 0,616663 | n.s. |
| original_gldm_LargeDependenceEmphasis                      | 1,450822 | 0,222837 | 0,616663 | n.s. |
| wavelet.LLL_glcm_MaximumProbability                        | 1,393419 | 0,24395  | 0,617051 | n.s. |
| wavelet.LHL_glszm_LargeAreaLowGrayLevelEmphasis            | 1,372154 | 0,252216 | 0,618059 | n.s. |
| wavelet.HLL_firstorder_RootMeanSquared                     | 1,374814 | 0,251169 | 0,618059 | n.s. |
| wavelet.HLL_glszm_ZonePercentage                           | 1,38747  | 0,246238 | 0,618059 | n.s. |
| wavelet.HLH_glcm_SumSquares                                | 1,376245 | 0,250607 | 0,618059 | n.s. |
| wavelet.HHH_glrlm_LongRunHighGrayLevelEmphasis             | 1,37649  | 0,250511 | 0,618059 | n.s. |
| wavelet.HHH_glcm_JointAverage                              | 1,376997 | 0,250312 | 0,618059 | n.s. |
| wavelet.HHH_glszm_GrayLevelVariance                        | 1,381404 | 0,248591 | 0,618059 | n.s. |
| wavelet.HHH_gldm_LowGrayLevelEmphasis                      | 1,383948 | 0,247601 | 0,618059 | n.s. |
| log.sigma.1.0.mm.3D_glcm_ClusterProminence                 | 1,370347 | 0,25293  | 0,618059 | n.s. |
| log.sigma.1.0.mm.3D_glszm_LargeAreaEmphasis                | 1,370108 | 0,253025 | 0,618059 | n.s. |
| log.sigma.2.0.mm.3D_firstorder_Skewness                    | 1,379627 | 0,249283 | 0,618059 | n.s. |
| log.sigma.2.0.mm.3D_glszm_LargeAreaLowGrayLevelEmphasis    | 1,37516  | 0,251033 | 0,618059 | n.s. |
| log.sigma.3.0.mm.3D_firstorder_Skewness                    | 1,373158 | 0,251821 | 0,618059 | n.s. |
| log.sigma.3.0.mm.3D_glrlm_ShortRunHighGrayLevelEmphasis    | 1,375649 | 0,250841 | 0,618059 | n.s. |
| log.sigma.3.0.mm.3D_glszm_SmallAreaEmphasis                | 1,379391 | 0,249376 | 0,618059 | n.s. |
| log.sigma.5.0.mm.3D_glszm_SizeZoneNonUniformityNormalized  | 1,386276 | 0,2467   | 0,618059 | n.s. |
| original_firstorder_Uniformity                             | 1,36998  | 0,253076 | 0,618059 | n.s. |
| log.sigma.1.0.mm.3D_firstorder_InterquartileRange          | 1,367037 | 0,254242 | 0,618399 | n.s. |
| log.sigma.5.0.mm.3D_glrlm_LowGrayLevelRunEmphasis          | 1,367436 | 0,254084 | 0,618399 | n.s. |
| wavelet.LLL_glszm_LargeAreaHighGrayLevelEmphasis           | 1,361876 | 0,256301 | 0,620897 | n.s. |
| log.sigma.2.0.mm.3D_gldm_SmallDependenceEmphasis           | 1,362195 | 0,256173 | 0,620897 | n.s. |
| wavelet.HHH_glcm_Autocorrelation                           | 1,359    | 0,257454 | 0,621191 | n.s. |
| log.sigma.3.0.mm.3D_glrlm_GrayLevelVariance                | 1,359394 | 0,257295 | 0,621191 | n.s. |
| wavelet.HHH_glszm_ZoneVariance                             | 1,354412 | 0,259303 | 0,623235 | n.s. |
| log.sigma.5.0.mm.3D_gldm_SmallDependenceEmphasis           | 1,35433  | 0,259336 | 0,623235 | n.s. |

|                                                            |          |          |          |      |
|------------------------------------------------------------|----------|----------|----------|------|
| original_glszm_LargeAreaLowGrayLevelEmphasis               | 1,352348 | 0,260139 | 0,623918 | n.s. |
| wavelet.LHL_glrlm_RunLengthNonUniformityNormalized         | 1,342508 | 0,264156 | 0,626197 | n.s. |
| wavelet.LHL_glszm_HighGrayLevelZoneEmphasis                | 1,341649 | 0,264509 | 0,626197 | n.s. |
| wavelet.HLH_gldm_SmallDependenceLowGrayLevelEmphasis       | 1,342384 | 0,264207 | 0,626197 | n.s. |
| wavelet.HHH_gldm_HighGrayLevelEmphasis                     | 1,338712 | 0,26572  | 0,626197 | n.s. |
| wavelet.LLL_glcm_SumSquares                                | 1,340239 | 0,26509  | 0,626197 | n.s. |
| wavelet.LLL_glcm_ClusterTendency                           | 1,338592 | 0,26577  | 0,626197 | n.s. |
| log.sigma.2.0.mm.3D_glrlm_GrayLevelNonUniformityNormalized | 1,341764 | 0,264462 | 0,626197 | n.s. |
| log.sigma.4.0.mm.3D_glszm_SmallAreaHighGrayLevelEmphasis   | 1,344477 | 0,263347 | 0,626197 | n.s. |
| log.sigma.4.0.mm.3D_gldm_DependenceNonUniformity           | 1,338849 | 0,265663 | 0,626197 | n.s. |
| wavelet.LHL_firstorder_Kurtosis                            | 1,326579 | 0,266836 | 0,626259 | n.s. |
| original_firstorder_RobustMeanAbsoluteDeviation            | 1,33674  | 0,266536 | 0,626259 | n.s. |
| wavelet.HLL_glszm_SmallAreaEmphasis                        | 1,333738 | 0,267782 | 0,627256 | n.s. |
| log.sigma.3.0.mm.3D_firstorder_Minimum                     | 1,331492 | 0,268718 | 0,628225 | n.s. |
| wavelet.HLH_firstorder_Uniformity                          | 1,330062 | 0,269315 | 0,628402 | n.s. |
| wavelet.HLH_gldm_GrayLevelVariance                         | 1,326572 | 0,270778 | 0,630592 | n.s. |
| wavelet.LHL_glszm_SmallAreaEmphasis                        | 1,325219 | 0,271346 | 0,630697 | n.s. |
| wavelet.HHL_glrlm_ShortRunEmphasis                         | 1,257786 | 0,301045 | 0,631921 | n.s. |
| wavelet.HHL_glrlm_RunPercentage                            | 1,304279 | 0,280284 | 0,631921 | n.s. |
| wavelet.HHL_glrlm_ShortRunHighGrayLevelEmphasis            | 1,268598 | 0,296103 | 0,631921 | n.s. |
| wavelet.HHL_glrlm_LowGrayLevelRunEmphasis                  | 1,287042 | 0,287832 | 0,631921 | n.s. |
| wavelet.HHL_glrlm_ShortRunLowGrayLevelEmphasis             | 1,285059 | 0,288712 | 0,631921 | n.s. |
| wavelet.HHL_glcm_JointEntropy                              | 1,252407 | 0,30353  | 0,631921 | n.s. |
| wavelet.HHL_glcm_SumEntropy                                | 1,250798 | 0,304276 | 0,631921 | n.s. |
| wavelet.HHL_glcm_ClusterProminence                         | 1,293456 | 0,285003 | 0,631921 | n.s. |
| wavelet.HHL_glcm_ClusterTendency                           | 1,264824 | 0,29782  | 0,631921 | n.s. |
| wavelet.HHL_glszm_ZoneEntropy                              | 1,307285 | 0,278985 | 0,631921 | n.s. |
| wavelet.HHL_gldm_DependenceEntropy                         | 1,249174 | 0,305031 | 0,631921 | n.s. |
| wavelet.LLH_glcm_Idn                                       | 1,287355 | 0,287694 | 0,631921 | n.s. |
| wavelet.LLH_glcm_InverseVariance                           | 1,247121 | 0,305989 | 0,631921 | n.s. |
| wavelet.LHL_glrlm_ShortRunEmphasis                         | 1,289285 | 0,28684  | 0,631921 | n.s. |
| wavelet.LHL_glcm_ClusterProminence                         | 1,283061 | 0,2896   | 0,631921 | n.s. |
| wavelet.LHL_glcm_MaximumProbability                        | 1,292711 | 0,285331 | 0,631921 | n.s. |
| wavelet.LHL_glszm_SmallAreaLowGrayLevelEmphasis            | 1,252484 | 0,303494 | 0,631921 | n.s. |
| wavelet.LHL_gldm_DependenceVariance                        | 1,251795 | 0,303813 | 0,631921 | n.s. |
| wavelet.LHL_gldm_LargeDependenceHighGrayLevelEmphasis      | 1,256244 | 0,301755 | 0,631921 | n.s. |
| wavelet.HLL_glrlm_LowGrayLevelRunEmphasis                  | 1,250905 | 0,304226 | 0,631921 | n.s. |
| wavelet.HLL_glrlm_LongRunLowGrayLevelEmphasis              | 1,277759 | 0,291969 | 0,631921 | n.s. |
| wavelet.HLL_glszm_SmallAreaLowGrayLevelEmphasis            | 1,266979 | 0,296838 | 0,631921 | n.s. |
| wavelet.HLL_glszm_HighGrayLevelZoneEmphasis                | 1,320927 | 0,273158 | 0,631921 | n.s. |
| wavelet.HLL_gldm_LargeDependenceLowGrayLevelEmphasis       | 1,256549 | 0,301615 | 0,631921 | n.s. |
| wavelet.HLH_firstorder_Minimum                             | 1,266403 | 0,2971   | 0,631921 | n.s. |
| wavelet.HLH_glrlm_RunLengthNonUniformity                   | 1,291245 | 0,285976 | 0,631921 | n.s. |
| wavelet.HLH_glrlm_GrayLevelVariance                        | 1,249279 | 0,304982 | 0,631921 | n.s. |
| wavelet.HLH_glrlm_GrayLevelNonUniformityNormalized         | 1,272701 | 0,294246 | 0,631921 | n.s. |
| wavelet.HLH_glcm_Imc2                                      | 1,267774 | 0,296477 | 0,631921 | n.s. |

|                                                            |          |          |          |      |
|------------------------------------------------------------|----------|----------|----------|------|
| wavelet.HLH_glcmm_SumEntropy                               | 1,312825 | 0,276606 | 0,631921 | n.s. |
| wavelet.HLH_glcmm_Contrast                                 | 1,292808 | 0,285288 | 0,631921 | n.s. |
| wavelet.HLH_gldm_DependenceNonUniformity                   | 1,255764 | 0,301977 | 0,631921 | n.s. |
| wavelet.HHH_glrmm_HighGrayLevelRunEmphasis                 | 1,298584 | 0,282759 | 0,631921 | n.s. |
| wavelet.HHH_glrmm_ShortRunHighGrayLevelEmphasis            | 1,26104  | 0,29955  | 0,631921 | n.s. |
| wavelet.HHH_glrmm_LowGrayLevelRunEmphasis                  | 1,291956 | 0,285663 | 0,631921 | n.s. |
| wavelet.HHH_glcmm_JointEnergy                              | 1,256041 | 0,301849 | 0,631921 | n.s. |
| wavelet.HHH_glszm_LargeAreaLowGrayLevelEmphasis            | 1,218406 | 0,29309  | 0,631921 | n.s. |
| wavelet.HHH_glszm_GrayLevelNonUniformityNormalized         | 1,309021 | 0,278238 | 0,631921 | n.s. |
| wavelet.HHH_glszm_LargeAreaHighGrayLevelEmphasis           | 1,238239 | 0,282951 | 0,631921 | n.s. |
| wavelet.LLL_firstorder_Skewness                            | 1,320427 | 0,27337  | 0,631921 | n.s. |
| wavelet.LLL_firstorder_RobustMeanAbsoluteDeviation         | 1,313131 | 0,276475 | 0,631921 | n.s. |
| wavelet.LLL_firstorder_InterquartileRange                  | 1,263125 | 0,298596 | 0,631921 | n.s. |
| wavelet.LLL_glszm_LowGrayLevelZoneEmphasis                 | 1,277474 | 0,292097 | 0,631921 | n.s. |
| wavelet.LLL_gldm_DependenceVariance                        | 1,259582 | 0,300219 | 0,631921 | n.s. |
| log.sigma.1.0.mm.3D_firstorder_Uniformity                  | 1,288626 | 0,287131 | 0,631921 | n.s. |
| log.sigma.1.0.mm.3D_firstorder_Mean                        | 1,306971 | 0,279121 | 0,631921 | n.s. |
| log.sigma.1.0.mm.3D_firstorder_RobustMeanAbsoluteDeviation | 1,247242 | 0,305932 | 0,631921 | n.s. |
| log.sigma.1.0.mm.3D_glcmm_ClusterTendency                  | 1,312475 | 0,276756 | 0,631921 | n.s. |
| log.sigma.1.0.mm.3D_glszm_ZoneVariance                     | 1,274247 | 0,293548 | 0,631921 | n.s. |
| log.sigma.1.0.mm.3D_glszm_LargeAreaHighGrayLevelEmphasis   | 1,288247 | 0,287299 | 0,631921 | n.s. |
| log.sigma.2.0.mm.3D_firstorder_Entropy                     | 1,27685  | 0,292377 | 0,631921 | n.s. |
| log.sigma.2.0.mm.3D_glrmm_LongRunLowGrayLevelEmphasis      | 1,257681 | 0,301093 | 0,631921 | n.s. |
| log.sigma.2.0.mm.3D_glcmm_Contrast                         | 1,286586 | 0,288034 | 0,631921 | n.s. |
| log.sigma.2.0.mm.3D_gldm_DependenceVariance                | 1,250691 | 0,304326 | 0,631921 | n.s. |
| log.sigma.2.0.mm.3D_gldm_DependenceEntropy                 | 1,291488 | 0,285869 | 0,631921 | n.s. |
| log.sigma.5.0.mm.3D_firstorder_Mean                        | 1,286309 | 0,288157 | 0,631921 | n.s. |
| log.sigma.5.0.mm.3D_firstorder_RootMeanSquared             | 1,279228 | 0,291311 | 0,631921 | n.s. |
| log.sigma.5.0.mm.3D_glrmm_GrayLevelNonUniformity           | 1,286419 | 0,288108 | 0,631921 | n.s. |
| original_glrmm_RunLengthNonUniformityNormalized            | 1,254083 | 0,302753 | 0,631921 | n.s. |
| original_glcmm_DifferenceVariance                          | 1,312484 | 0,276752 | 0,631921 | n.s. |
| original_glcmm_lmc2                                        | 1,256152 | 0,301798 | 0,631921 | n.s. |
| original_glcmm_ClusterTendency                             | 1,261301 | 0,299431 | 0,631921 | n.s. |
| original_glcmm_ClusterShade                                | 1,262526 | 0,298869 | 0,631921 | n.s. |
| original_glszm_ZoneVariance                                | 1,313483 | 0,276324 | 0,631921 | n.s. |
| original_glszm_LargeAreaEmphasis                           | 1,291295 | 0,285954 | 0,631921 | n.s. |
| wavelet.HLL_gldm_LowGrayLevelEmphasis                      | 1,244983 | 0,306988 | 0,632036 | n.s. |
| log.sigma.2.0.mm.3D_glrmm_GrayLevelVariance                | 1,244757 | 0,307094 | 0,632036 | n.s. |
| wavelet.HHH_firstorder_Median                              | 1,235678 | 0,307775 | 0,632358 | n.s. |
| wavelet.HHL_glszm_SizeZoneNonUniformity                    | 1,240332 | 0,309171 | 0,632815 | n.s. |
| wavelet.HHH_glszm_LargeAreaEmphasis                        | 1,186281 | 0,310101 | 0,632815 | n.s. |
| log.sigma.1.0.mm.3D_glcmm_ldmn                             | 1,238699 | 0,309941 | 0,632815 | n.s. |
| log.sigma.5.0.mm.3D_glszm_ZonePercentage                   | 1,239022 | 0,309789 | 0,632815 | n.s. |
| wavelet.HHL_firstorder_Variance                            | 1,229673 | 0,314224 | 0,633409 | n.s. |
| wavelet.HHL_glcmm_Id                                       | 1,227787 | 0,315126 | 0,633409 | n.s. |
| wavelet.HLL_glrmm_ShortRunLowGrayLevelEmphasis             | 1,235453 | 0,311476 | 0,633409 | n.s. |

|                                                               |          |          |          |      |
|---------------------------------------------------------------|----------|----------|----------|------|
| wavelet.HLH_glcmm_JointEntropy                                | 1,227927 | 0,315059 | 0,633409 | n.s. |
| log.sigma.2.0.mm.3D_gldm_LargeDependenceLowGrayLevelEmphasis  | 1,231735 | 0,313242 | 0,633409 | n.s. |
| log.sigma.4.0.mm.3D_gldm_LargeDependenceHighGrayLevelEmphasis | 1,229602 | 0,314259 | 0,633409 | n.s. |
| original_glcmm_Id                                             | 1,231953 | 0,313138 | 0,633409 | n.s. |
| original_glcmm_SumSquares                                     | 1,234426 | 0,311963 | 0,633409 | n.s. |
| original_glszm_SmallAreaHighGrayLevelEmphasis                 | 1,229491 | 0,314311 | 0,633409 | n.s. |
| wavelet.HHL_glrIm_LongRunLowGrayLevelEmphasis                 | 1,224431 | 0,316735 | 0,633502 | n.s. |
| wavelet.HHL_gldm_LowGrayLevelEmphasis                         | 1,224457 | 0,316723 | 0,633502 | n.s. |
| log.sigma.2.0.mm.3D_glszm_GrayLevelNonUniformity              | 1,224398 | 0,316751 | 0,633502 | n.s. |
| log.sigma.1.0.mm.3D_glcmm_MaximumProbability                  | 1,221823 | 0,317991 | 0,634927 | n.s. |
| original_gldm_DependenceVariance                              | 1,219362 | 0,319179 | 0,636245 | n.s. |
| wavelet.HHL_glrIm_GrayLevelNonUniformity                      | 1,177748 | 0,339841 | 0,639625 | n.s. |
| wavelet.HHL_glrIm_HighGrayLevelRunEmphasis                    | 1,199113 | 0,329099 | 0,639625 | n.s. |
| wavelet.HHL_glrIm_RunEntropy                                  | 1,207775 | 0,324824 | 0,639625 | n.s. |
| wavelet.HHL_glcmm_SumSquares                                  | 1,18771  | 0,334797 | 0,639625 | n.s. |
| wavelet.HHL_glcmm_Idm                                         | 1,191134 | 0,333077 | 0,639625 | n.s. |
| wavelet.HHL_glszm_LargeAreaEmphasis                           | 1,181403 | 0,337983 | 0,639625 | n.s. |
| wavelet.HHL_gldm_LargeDependenceEmphasis                      | 1,188824 | 0,334237 | 0,639625 | n.s. |
| wavelet.LHL_glrIm_GrayLevelVariance                           | 1,192687 | 0,3323   | 0,639625 | n.s. |
| wavelet.LHL_gldm_DependenceNonUniformityNormalized            | 1,20695  | 0,32523  | 0,639625 | n.s. |
| wavelet.HLL_firstorder_Mean                                   | 1,195751 | 0,33077  | 0,639625 | n.s. |
| wavelet.HLL_firstorder_Range                                  | 1,172529 | 0,342509 | 0,639625 | n.s. |
| wavelet.HLL_glcmm_InverseVariance                             | 1,209119 | 0,324165 | 0,639625 | n.s. |
| wavelet.HLL_glszm_LowGrayLevelZoneEmphasis                    | 1,211631 | 0,322936 | 0,639625 | n.s. |
| wavelet.HLL_gldm_SmallDependenceHighGrayLevelEmphasis         | 1,212572 | 0,322477 | 0,639625 | n.s. |
| wavelet.HLL_gldm_SmallDependenceLowGrayLevelEmphasis          | 1,172285 | 0,342633 | 0,639625 | n.s. |
| wavelet.LHH_glcmm_Imc1                                        | 1,172363 | 0,342593 | 0,639625 | n.s. |
| wavelet.LHH_glszm_SmallAreaLowGrayLevelEmphasis               | 1,172686 | 0,342428 | 0,639625 | n.s. |
| wavelet.HLH_glrIm_LongRunHighGrayLevelEmphasis                | 1,17224  | 0,342657 | 0,639625 | n.s. |
| wavelet.HLH_glcmm_JointAverage                                | 1,186617 | 0,335347 | 0,639625 | n.s. |
| wavelet.HLH_glcmm_Correlation                                 | 1,195021 | 0,331134 | 0,639625 | n.s. |
| wavelet.HLH_gldm_SmallDependenceEmphasis                      | 1,18825  | 0,334525 | 0,639625 | n.s. |
| wavelet.HHH_glrIm_ShortRunLowGrayLevelEmphasis                | 1,191461 | 0,332913 | 0,639625 | n.s. |
| wavelet.LLL_glcmm_Contrast                                    | 1,178166 | 0,339628 | 0,639625 | n.s. |
| wavelet.LLL_glszm_GrayLevelNonUniformity                      | 1,193896 | 0,331696 | 0,639625 | n.s. |
| log.sigma.1.0.mm.3D_glrIm_RunVariance                         | 1,210505 | 0,323487 | 0,639625 | n.s. |
| log.sigma.1.0.mm.3D_glcmm_DifferenceEntropy                   | 1,186047 | 0,335634 | 0,639625 | n.s. |
| log.sigma.1.0.mm.3D_glcmm_SumSquares                          | 1,197589 | 0,329856 | 0,639625 | n.s. |
| log.sigma.1.0.mm.3D_glszm_ZonePercentage                      | 1,193211 | 0,332038 | 0,639625 | n.s. |
| log.sigma.2.0.mm.3D_glszm_SmallAreaEmphasis                   | 1,194608 | 0,33134  | 0,639625 | n.s. |
| log.sigma.2.0.mm.3D_glszm_ZoneVariance                        | 1,206152 | 0,325622 | 0,639625 | n.s. |
| log.sigma.2.0.mm.3D_gldm_DependenceNonUniformityNormalized    | 1,178921 | 0,339244 | 0,639625 | n.s. |
| log.sigma.3.0.mm.3D_glrIm_RunLengthNonUniformity              | 1,176314 | 0,340572 | 0,639625 | n.s. |
| log.sigma.3.0.mm.3D_glrIm_ShortRunLowGrayLevelEmphasis        | 1,179627 | 0,338885 | 0,639625 | n.s. |
| log.sigma.3.0.mm.3D_glszm_GrayLevelVariance                   | 1,173843 | 0,341835 | 0,639625 | n.s. |
| log.sigma.4.0.mm.3D_glrIm_LongRunHighGrayLevelEmphasis        | 1,192759 | 0,332264 | 0,639625 | n.s. |

|                                                               |          |          |          |      |
|---------------------------------------------------------------|----------|----------|----------|------|
| log.sigma.5.0.mm.3D_firstorder_RobustMeanAbsoluteDeviation    | 1,193067 | 0,33211  | 0,639625 | n.s. |
| log.sigma.5.0.mm.3D_glszm_LargeAreaHighGrayLevelEmphasis      | 1,139347 | 0,336273 | 0,639625 | n.s. |
| log.sigma.5.0.mm.3D_gldm_LargeDependenceHighGrayLevelEmphasis | 1,185949 | 0,335684 | 0,639625 | n.s. |
| original_glcm_Idm                                             | 1,202031 | 0,327654 | 0,639625 | n.s. |
| original_glszm_SmallAreaLowGrayLevelEmphasis                  | 1,198301 | 0,329502 | 0,639625 | n.s. |
| original_gldm_SmallDependenceHighGrayLevelEmphasis            | 1,180607 | 0,338387 | 0,639625 | n.s. |
| log.sigma.5.0.mm.3D_glszm_SmallAreaEmphasis                   | 1,164282 | 0,3435   | 0,640207 | n.s. |
| wavelet.HHL_glcm_DifferenceAverage                            | 1,166328 | 0,3457   | 0,640867 | n.s. |
| wavelet.LLH_glszm_SmallAreaEmphasis                           | 1,165982 | 0,345878 | 0,640867 | n.s. |
| wavelet.LHL_glrIm_ShortRunLowGrayLevelEmphasis                | 1,164708 | 0,346537 | 0,640867 | n.s. |
| wavelet.LHH_glszm_LowGrayLevelZoneEmphasis                    | 1,163723 | 0,347048 | 0,640867 | n.s. |
| log.sigma.2.0.mm.3D_firstorder_Energy                         | 1,121034 | 0,346911 | 0,640867 | n.s. |
| log.sigma.2.0.mm.3D_firstorder_TotalEnergy                    | 1,121034 | 0,346911 | 0,640867 | n.s. |
| log.sigma.4.0.mm.3D_glszm_SmallAreaEmphasis                   | 1,156265 | 0,347713 | 0,641112 | n.s. |
| wavelet.HHH_glszm_ZonePercentage                              | 1,159213 | 0,349391 | 0,64224  | n.s. |
| log.sigma.2.0.mm.3D_gldm_DependenceNonUniformity              | 1,159249 | 0,349372 | 0,64224  | n.s. |
| wavelet.HHL_glszm_ZoneVariance                                | 1,152354 | 0,35298  | 0,646862 | n.s. |
| wavelet.HHH_glrIm_GrayLevelVariance                           | 1,15267  | 0,352814 | 0,646862 | n.s. |
| wavelet.LHL_glcm_Id                                           | 1,145548 | 0,356571 | 0,647528 | n.s. |
| wavelet.LHL_gldm_GrayLevelVariance                            | 1,146694 | 0,355964 | 0,647528 | n.s. |
| wavelet.HLL_glszm_GrayLevelNonUniformity                      | 1,145777 | 0,35645  | 0,647528 | n.s. |
| wavelet.HLH_gldm_LargeDependenceHighGrayLevelEmphasis         | 1,147972 | 0,355289 | 0,647528 | n.s. |
| log.sigma.2.0.mm.3D_gldm_SmallDependenceHighGrayLevelEmphasis | 1,150102 | 0,354165 | 0,647528 | n.s. |
| original_glszm_SizeZoneNonUniformity                          | 1,145745 | 0,356467 | 0,647528 | n.s. |
| wavelet.LLH_firstorder_RootMeanSquared                        | 1,142252 | 0,35832  | 0,648177 | n.s. |
| wavelet.LHL_glrIm_LowGrayLevelRunEmphasis                     | 1,141832 | 0,358543 | 0,648177 | n.s. |
| log.sigma.4.0.mm.3D_glszm_GrayLevelNonUniformityNormalized    | 1,143297 | 0,357764 | 0,648177 | n.s. |
| wavelet.HHL_gldm_HighGrayLevelEmphasis                        | 1,138832 | 0,360143 | 0,648707 | n.s. |
| wavelet.LLH_firstorder_Mean                                   | 1,139204 | 0,359944 | 0,648707 | n.s. |
| wavelet.HLH_firstorder_Entropy                                | 1,138251 | 0,360453 | 0,648707 | n.s. |
| wavelet.HHL_gldm_LargeDependenceLowGrayLevelEmphasis          | 1,135324 | 0,362019 | 0,649648 | n.s. |
| original_glcm_Correlation                                     | 1,135258 | 0,362055 | 0,649648 | n.s. |
| wavelet.HHL_glcm_JointAverage                                 | 1,128006 | 0,36596  | 0,652589 | n.s. |
| wavelet.HHL_glszm_GrayLevelVariance                           | 1,124364 | 0,367934 | 0,652589 | n.s. |
| wavelet.LLH_firstorder_Kurtosis                               | 1,122693 | 0,368842 | 0,652589 | n.s. |
| wavelet.LHL_glcm_Idn                                          | 1,121789 | 0,369334 | 0,652589 | n.s. |
| wavelet.LHL_gldm_LowGrayLevelEmphasis                         | 1,120759 | 0,369896 | 0,652589 | n.s. |
| wavelet.HLH_glrIm_HighGrayLevelRunEmphasis                    | 1,123747 | 0,368269 | 0,652589 | n.s. |
| wavelet.HLH_glszm_ZonePercentage                              | 1,119352 | 0,370664 | 0,652589 | n.s. |
| wavelet.HLH_glszm_GrayLevelNonUniformityNormalized            | 1,121989 | 0,369225 | 0,652589 | n.s. |
| wavelet.HHH_firstorder_Maximum                                | 1,126778 | 0,366624 | 0,652589 | n.s. |
| log.sigma.1.0.mm.3D_gldm_DependenceEntropy                    | 1,119213 | 0,37074  | 0,652589 | n.s. |
| log.sigma.2.0.mm.3D_glcm_JointEnergy                          | 1,128399 | 0,365747 | 0,652589 | n.s. |
| original_glcm_ClusterProminence                               | 1,121227 | 0,369641 | 0,652589 | n.s. |
| original_glszm_HighGrayLevelZoneEmphasis                      | 1,131184 | 0,364244 | 0,652589 | n.s. |
| wavelet.HHL_glcm_Contrast                                     | 1,117125 | 0,371882 | 0,652608 | n.s. |

|                                                           |          |          |          |      |
|-----------------------------------------------------------|----------|----------|----------|------|
| wavelet.LHL_glcmm_Idm                                     | 1,114782 | 0,373167 | 0,652608 | n.s. |
| wavelet.HLH_glcmm_DifferenceVariance                      | 1,114428 | 0,373362 | 0,652608 | n.s. |
| wavelet.HLH_gldm_HighGrayLevelEmphasis                    | 1,116144 | 0,37242  | 0,652608 | n.s. |
| log.sigma.4.0.mm.3D_firstorder_Maximum                    | 1,114247 | 0,373461 | 0,652608 | n.s. |
| wavelet.LLH_glrmm_RunPercentage                           | 1,111096 | 0,375196 | 0,652797 | n.s. |
| wavelet.HLH_glrmm_ShortRunHighGrayLevelEmphasis           | 1,111664 | 0,374882 | 0,652797 | n.s. |
| wavelet.HLH_glcmm_Autocorrelation                         | 1,111174 | 0,375153 | 0,652797 | n.s. |
| wavelet.HHH_firstorder_Mean                               | 1,10479  | 0,375749 | 0,652816 | n.s. |
| wavelet.HHL_glszm_SizeZoneNonUniformityNormalized         | 1,107581 | 0,377139 | 0,654287 | n.s. |
| wavelet.HHL_glcmm_JointEnergy                             | 1,102969 | 0,379699 | 0,657462 | n.s. |
| wavelet.HHH_gldm_DependenceEntropy                        | 1,10232  | 0,380061 | 0,657462 | n.s. |
| log.sigma.5.0.mm.3D_firstorder_InterquartileRange         | 1,101073 | 0,380756 | 0,657719 | n.s. |
| wavelet.HHL_glrmm_LongRunEmphasis                         | 1,099807 | 0,381463 | 0,657996 | n.s. |
| wavelet.HHL_glszm_SmallAreaHighGrayLevelEmphasis          | 1,095581 | 0,38383  | 0,661131 | n.s. |
| wavelet.HHL_glcmm_Autocorrelation                         | 1,090792 | 0,386526 | 0,66407  | n.s. |
| log.sigma.1.0.mm.3D_glszm_ZoneEntropy                     | 1,090592 | 0,386639 | 0,66407  | n.s. |
| wavelet.HHL_firstorder_InterquartileRange                 | 1,086142 | 0,389157 | 0,667443 | n.s. |
| wavelet.LHL_glszm_SizeZoneNonUniformityNormalized         | 1,0826   | 0,391171 | 0,669628 | n.s. |
| wavelet.HHH_firstorder_RootMeanSquared                    | 1,076131 | 0,392099 | 0,669628 | n.s. |
| original_glcmm_DifferenceAverage                          | 1,081835 | 0,391607 | 0,669628 | n.s. |
| wavelet.HHL_glszm_SizeZoneNonUniformityNormalized         | 1,079257 | 0,393079 | 0,67035  | n.s. |
| wavelet.HHL_glcmm_InverseVariance                         | 1,074931 | 0,395559 | 0,670751 | n.s. |
| wavelet.LLH_glszm_GrayLevelVariance                       | 1,072258 | 0,397097 | 0,670751 | n.s. |
| wavelet.LHL_glcmm_Imc1                                    | 1,072054 | 0,397215 | 0,670751 | n.s. |
| wavelet.LHL_gldm_SmallDependenceLowGrayLevelEmphasis      | 1,072156 | 0,397156 | 0,670751 | n.s. |
| wavelet.HLL_glcmm_Imc2                                    | 1,077329 | 0,394183 | 0,670751 | n.s. |
| wavelet.LHH_glszm_ZoneVariance                            | 1,071089 | 0,397771 | 0,670751 | n.s. |
| wavelet.LLL_glcmm_ClusterProminence                       | 1,071654 | 0,397446 | 0,670751 | n.s. |
| log.sigma.2.0.mm.3D_firstorder_90Percentile               | 1,076878 | 0,394441 | 0,670751 | n.s. |
| log.sigma.3.0.mm.3D_firstorder_90Percentile               | 1,069323 | 0,398791 | 0,671531 | n.s. |
| wavelet.HHL_glcmm_Imc1                                    | 1,066656 | 0,400335 | 0,67283  | n.s. |
| wavelet.LHH_glcmm_ClusterShade                            | 1,059555 | 0,401798 | 0,67283  | n.s. |
| log.sigma.1.0.mm.3D_glcmm_DifferenceVariance              | 1,064672 | 0,401487 | 0,67283  | n.s. |
| log.sigma.2.0.mm.3D_glszm_ZoneEntropy                     | 1,064244 | 0,401735 | 0,67283  | n.s. |
| wavelet.HHL_firstorder_MeanAbsoluteDeviation              | 1,059656 | 0,404409 | 0,675734 | n.s. |
| wavelet.LHH_glszm_LargeAreaEmphasis                       | 1,059237 | 0,404655 | 0,675734 | n.s. |
| log.sigma.3.0.mm.3D_glszm_SizeZoneNonUniformityNormalized | 1,057088 | 0,405912 | 0,676896 | n.s. |
| wavelet.LHH_glrmm_RunVariance                             | 1,05283  | 0,408413 | 0,677313 | n.s. |
| wavelet.HLH_glrmm_ShortRunLowGrayLevelEmphasis            | 1,054564 | 0,407393 | 0,677313 | n.s. |
| log.sigma.1.0.mm.3D_glcmm_Imc1                            | 1,053361 | 0,4081   | 0,677313 | n.s. |
| log.sigma.4.0.mm.3D_firstorder_Skewness                   | 1,054673 | 0,407329 | 0,677313 | n.s. |
| wavelet.LLH_glcmm_Imc2                                    | 1,049346 | 0,410467 | 0,678058 | n.s. |
| wavelet.LLH_glszm_SmallAreaLowGrayLevelEmphasis           | 1,049203 | 0,410552 | 0,678058 | n.s. |
| wavelet.LHH_firstorder_Kurtosis                           | 1,046038 | 0,409838 | 0,678058 | n.s. |
| original_glszm_LargeAreaHighGrayLevelEmphasis             | 1,047941 | 0,411298 | 0,67836  | n.s. |
| wavelet.HHH_firstorder_Entropy                            | 1,046367 | 0,41223  | 0,678967 | n.s. |



|                                                            |          |          |          |      |
|------------------------------------------------------------|----------|----------|----------|------|
| wavelet.LHL_glcm_Contrast                                  | 1,043039 | 0,414207 | 0,681291 | n.s. |
| wavelet.HHL_glszm_SmallAreaEmphasis                        | 1,039316 | 0,416425 | 0,683073 | n.s. |
| log.sigma.2.0.mm.3D_glszm_LargeAreaHighGrayLevelEmphasis   | 1,010538 | 0,416145 | 0,683073 | n.s. |
| log.sigma.2.0.mm.3D_gldm_GrayLevelVariance                 | 1,03788  | 0,417284 | 0,68355  | n.s. |
| wavelet.HLH_glrlm_LowGrayLevelRunEmphasis                  | 1,03397  | 0,419627 | 0,683754 | n.s. |
| log.sigma.1.0.mm.3D_gldm_DependenceNonUniformityNormalized | 1,03424  | 0,419465 | 0,683754 | n.s. |
| log.sigma.3.0.mm.3D_glszm_HighGrayLevelZoneEmphasis        | 1,034218 | 0,419478 | 0,683754 | n.s. |
| log.sigma.5.0.mm.3D_glcm_ClusterShade                      | 1,033882 | 0,41968  | 0,683754 | n.s. |
| wavelet.HHL_glcm_DifferenceEntropy                         | 1,023704 | 0,425825 | 0,690032 | n.s. |
| wavelet.LHL_firstorder_Variance                            | 1,024572 | 0,425299 | 0,690032 | n.s. |
| log.sigma.1.0.mm.3D_glcm_JointEnergy                       | 1,026482 | 0,424142 | 0,690032 | n.s. |
| log.sigma.3.0.mm.3D_firstorder_Kurtosis                    | 1,024357 | 0,425429 | 0,690032 | n.s. |
| wavelet.LHH_gldm_LargeDependenceLowGrayLevelEmphasis       | 1,017858 | 0,429385 | 0,693932 | n.s. |
| wavelet.HHH_gldm_SmallDependenceEmphasis                   | 1,018338 | 0,429092 | 0,693932 | n.s. |
| wavelet.LLH_glcm_MaximumProbability                        | 1,015128 | 0,431054 | 0,693968 | n.s. |
| wavelet.LHL_glcm_DifferenceVariance                        | 1,014994 | 0,431136 | 0,693968 | n.s. |
| wavelet.HHH_gldm_DependenceVariance                        | 1,016168 | 0,430418 | 0,693968 | n.s. |
| log.sigma.2.0.mm.3D_firstorder_Uniformity                  | 1,009443 | 0,434546 | 0,697524 | n.s. |
| log.sigma.3.0.mm.3D_glrlm_LongRunEmphasis                  | 1,008571 | 0,435084 | 0,697524 | n.s. |
| log.sigma.5.0.mm.3D_glszm_LargeAreaLowGrayLevelEmphasis    | 1,009548 | 0,434481 | 0,697524 | n.s. |
| wavelet.HHL_glrlm_RunVariance                              | 1,002104 | 0,439083 | 0,699235 | n.s. |
| wavelet.LHH_gldm_SmallDependenceLowGrayLevelEmphasis       | 1,002041 | 0,439122 | 0,699235 | n.s. |
| wavelet.HLH_gldm_LowGrayLevelEmphasis                      | 1,001504 | 0,439456 | 0,699235 | n.s. |
| log.sigma.4.0.mm.3D_glszm_ZoneVariance                     | 1,004243 | 0,437757 | 0,699235 | n.s. |
| log.sigma.5.0.mm.3D_glszm_SizeZoneNonUniformity            | 1,00001  | 0,439635 | 0,699235 | n.s. |
| original_glcm_Contrast                                     | 1,002936 | 0,438567 | 0,699235 | n.s. |
| wavelet.LHL_glcm_DifferenceAverage                         | 0,997521 | 0,441934 | 0,701964 | n.s. |
| wavelet.HLH_glcm_Idmn                                      | 0,995199 | 0,443383 | 0,702165 | n.s. |
| wavelet.LLL_glcm_Imc2                                      | 0,991722 | 0,44556  | 0,702165 | n.s. |
| log.sigma.3.0.mm.3D_firstorder_Energy                      | 0,968016 | 0,445027 | 0,702165 | n.s. |
| log.sigma.3.0.mm.3D_firstorder_TotalEnergy                 | 0,968016 | 0,445027 | 0,702165 | n.s. |
| log.sigma.3.0.mm.3D_glcm_ClusterProminence                 | 0,996036 | 0,442861 | 0,702165 | n.s. |
| log.sigma.3.0.mm.3D_gldm_DependenceNonUniformity           | 0,993626 | 0,444366 | 0,702165 | n.s. |
| wavelet.LHL_glrlm_LongRunLowGrayLevelEmphasis              | 0,988525 | 0,447567 | 0,7027   | n.s. |
| wavelet.LHH_gldm_LargeDependenceHighGrayLevelEmphasis      | 0,989061 | 0,44723  | 0,7027   | n.s. |
| log.sigma.5.0.mm.3D_glrlm_LongRunHighGrayLevelEmphasis     | 0,988392 | 0,447651 | 0,7027   | n.s. |
| log.sigma.3.0.mm.3D_glcm_DifferenceEntropy                 | 0,987178 | 0,448415 | 0,702984 | n.s. |
| wavelet.HLH_glcm_Idn                                       | 0,984062 | 0,45038  | 0,7039   | n.s. |
| wavelet.HLH_glcm_DifferenceEntropy                         | 0,983993 | 0,450424 | 0,7039   | n.s. |
| log.sigma.2.0.mm.3D_glcm_SumSquares                        | 0,983472 | 0,450753 | 0,7039   | n.s. |
| wavelet.LHH_firstorder_Minimum                             | 0,979772 | 0,453096 | 0,705728 | n.s. |
| wavelet.LLL_gldm_DependenceEntropy                         | 0,980094 | 0,452892 | 0,705728 | n.s. |
| wavelet.HHL_glcm_DifferenceVariance                        | 0,96837  | 0,460369 | 0,708948 | n.s. |
| wavelet.HHL_glcm_ClusterShade                              | 0,961608 | 0,464719 | 0,708948 | n.s. |
| wavelet.HHL_glszm_SmallAreaLowGrayLevelEmphasis            | 0,970061 | 0,459285 | 0,708948 | n.s. |
| wavelet.LHL_glcm_Idmn                                      | 0,970511 | 0,458997 | 0,708948 | n.s. |

|                                                          |          |          |          |      |
|----------------------------------------------------------|----------|----------|----------|------|
| wavelet.LHL_glszm_LargeAreaHighGrayLevelEmphasis         | 0,969716 | 0,459506 | 0,708948 | n.s. |
| wavelet.LHH_firstorder_Range                             | 0,966269 | 0,461717 | 0,708948 | n.s. |
| wavelet.LHH_glszm_ZoneEntropy                            | 0,962262 | 0,464297 | 0,708948 | n.s. |
| wavelet.HHH_glrlm_RunLengthNonUniformityNormalized       | 0,961643 | 0,464697 | 0,708948 | n.s. |
| wavelet.LLL_glszm_SizeZoneNonUniformityNormalized        | 0,967983 | 0,460617 | 0,708948 | n.s. |
| wavelet.LLL_gldm_LargeDependenceLowGrayLevelEmphasis     | 0,965316 | 0,46233  | 0,708948 | n.s. |
| log.sigma.2.0.mm.3D_firstorder_Variance                  | 0,965219 | 0,462392 | 0,708948 | n.s. |
| log.sigma.2.0.mm.3D_glcm_MaximumProbability              | 0,972527 | 0,457708 | 0,708948 | n.s. |
| log.sigma.2.0.mm.3D_gldm_LowGrayLevelEmphasis            | 0,970664 | 0,458899 | 0,708948 | n.s. |
| log.sigma.3.0.mm.3D_glcm_ClusterShade                    | 0,960904 | 0,465174 | 0,708948 | n.s. |
| log.sigma.3.0.mm.3D_glszm_ZonePercentage                 | 0,961405 | 0,46485  | 0,708948 | n.s. |
| log.sigma.4.0.mm.3D_glszm_SmallAreaLowGrayLevelEmphasis  | 0,963468 | 0,463519 | 0,708948 | n.s. |
| log.sigma.5.0.mm.3D_glszm_GrayLevelNonUniformity         | 0,969698 | 0,459518 | 0,708948 | n.s. |
| wavelet.LHH_glrlm_LongRunLowGrayLevelEmphasis            | 0,958415 | 0,466783 | 0,710502 | n.s. |
| log.sigma.3.0.mm.3D_glszm_SmallAreaHighGrayLevelEmphasis | 0,955595 | 0,468611 | 0,712384 | n.s. |
| wavelet.HHL_glrlm_LongRunHighGrayLevelEmphasis           | 0,954654 | 0,469222 | 0,712413 | n.s. |
| wavelet.LHH_gldm_GrayLevelNonUniformity                  | 0,951937 | 0,470989 | 0,714195 | n.s. |
| wavelet.HHL_gldm_GrayLevelNonUniformity                  | 0,949101 | 0,472839 | 0,716098 | n.s. |
| log.sigma.4.0.mm.3D_glszm_SizeZoneNonUniformity          | 0,946101 | 0,4748   | 0,718165 | n.s. |
| wavelet.LLH_firstorder_InterquartileRange                | 0,944459 | 0,475876 | 0,718889 | n.s. |
| wavelet.LHH_gldm_DependenceNonUniformityNormalized       | 0,942691 | 0,477036 | 0,719739 | n.s. |
| log.sigma.5.0.mm.3D_glszm_LargeAreaEmphasis              | 0,921691 | 0,47782  | 0,72002  | n.s. |
| log.sigma.1.0.mm.3D_firstorder_Maximum                   | 0,940122 | 0,478725 | 0,720482 | n.s. |
| wavelet.HHH_glrlm_ShortRunEmphasis                       | 0,938097 | 0,480059 | 0,720687 | n.s. |
| log.sigma.2.0.mm.3D_glcm_ClusterShade                    | 0,938526 | 0,479777 | 0,720687 | n.s. |
| wavelet.LHL_firstorder_InterquartileRange                | 0,934985 | 0,482114 | 0,722838 | n.s. |
| log.sigma.3.0.mm.3D_glcm_DifferenceVariance              | 0,934111 | 0,482693 | 0,722838 | n.s. |
| wavelet.HHH_glcm_ClusterShade                            | 0,924544 | 0,487268 | 0,727879 | n.s. |
| log.sigma.3.0.mm.3D_glrlm_ShortRunEmphasis               | 0,927287 | 0,487223 | 0,727879 | n.s. |
| log.sigma.1.0.mm.3D_glcm_Idn                             | 0,924231 | 0,48926  | 0,728194 | n.s. |
| log.sigma.2.0.mm.3D_firstorder_MeanAbsoluteDeviation     | 0,924722 | 0,488933 | 0,728194 | n.s. |
| log.sigma.2.0.mm.3D_glrlm_LongRunHighGrayLevelEmphasis   | 0,924182 | 0,489293 | 0,728194 | n.s. |
| wavelet.HHH_glcm_SumSquares                              | 0,923041 | 0,490055 | 0,728427 | n.s. |
| wavelet.LLH_firstorder_RobustMeanAbsoluteDeviation       | 0,92204  | 0,490724 | 0,728523 | n.s. |
| log.sigma.5.0.mm.3D_glrlm_RunVariance                    | 0,920791 | 0,49156  | 0,728865 | n.s. |
| log.sigma.2.0.mm.3D_glcm_ClusterTendency                 | 0,919412 | 0,492484 | 0,729337 | n.s. |
| wavelet.LLH_glcm_lmc1                                    | 0,915518 | 0,495099 | 0,730513 | n.s. |
| wavelet.HLH_glrlm_LongRunLowGrayLevelEmphasis            | 0,917119 | 0,494022 | 0,730513 | n.s. |
| wavelet.HLH_gldm_LargeDependenceLowGrayLevelEmphasis     | 0,915531 | 0,49509  | 0,730513 | n.s. |
| wavelet.LHL_glrlm_RunEntropy                             | 0,911675 | 0,497688 | 0,733435 | n.s. |
| wavelet.LHL_glcm_JointAverage                            | 0,907667 | 0,500397 | 0,734729 | n.s. |
| wavelet.LHL_glcm_SumSquares                              | 0,909047 | 0,499463 | 0,734729 | n.s. |
| wavelet.LLL_gldm_DependenceNonUniformityNormalized       | 0,907953 | 0,500203 | 0,734729 | n.s. |
| wavelet.LLL_gldm_SmallDependenceLowGrayLevelEmphasis     | 0,905325 | 0,501984 | 0,736162 | n.s. |
| wavelet.LHL_glrlm_ShortRunHighGrayLevelEmphasis          | 0,904018 | 0,502872 | 0,736566 | n.s. |
| log.sigma.3.0.mm.3D_glszm_ZoneEntropy                    | 0,90038  | 0,505346 | 0,738832 | n.s. |

|                                                               |          |          |          |      |
|---------------------------------------------------------------|----------|----------|----------|------|
| original_glcm_ldmn                                            | 0,89994  | 0,505646 | 0,738832 | n.s. |
| wavelet.LHH_glrlm_LongRunHighGrayLevelEmphasis                | 0,894514 | 0,509351 | 0,739882 | n.s. |
| wavelet.HHH_glrlm_RunLengthNonUniformity                      | 0,894425 | 0,509412 | 0,739882 | n.s. |
| wavelet.HHH_glrlm_RunEntropy                                  | 0,894389 | 0,509437 | 0,739882 | n.s. |
| wavelet.HHH_glszm_HighGrayLevelZoneEmphasis                   | 0,896787 | 0,507797 | 0,739882 | n.s. |
| log.sigma.3.0.mm.3D_gldm_DependenceNonUniformityNormalized    | 0,894701 | 0,509223 | 0,739882 | n.s. |
| wavelet.HHL_glcm_MaximumProbability                           | 0,891657 | 0,511309 | 0,74096  | n.s. |
| wavelet.LHL_glrlm_LongRunHighGrayLevelEmphasis                | 0,890613 | 0,512026 | 0,74096  | n.s. |
| log.sigma.2.0.mm.3D_glszm_HighGrayLevelZoneEmphasis           | 0,891451 | 0,511451 | 0,74096  | n.s. |
| wavelet.LHL_firstorder_Entropy                                | 0,881215 | 0,518503 | 0,743873 | n.s. |
| wavelet.LHL_glrlm_HighGrayLevelRunEmphasis                    | 0,880523 | 0,518981 | 0,743873 | n.s. |
| wavelet.LHH_gldm_LowGrayLevelEmphasis                         | 0,882976 | 0,517285 | 0,743873 | n.s. |
| wavelet.HLH_glszm_LargeAreaLowGrayLevelEmphasis               | 0,881519 | 0,518293 | 0,743873 | n.s. |
| log.sigma.1.0.mm.3D_glrlm_ShortRunEmphasis                    | 0,884386 | 0,516312 | 0,743873 | n.s. |
| log.sigma.2.0.mm.3D_glrlm_RunEntropy                          | 0,886349 | 0,514959 | 0,743873 | n.s. |
| log.sigma.3.0.mm.3D_gldm_SmallDependenceHighGrayLevelEmphasis | 0,885378 | 0,515628 | 0,743873 | n.s. |
| log.sigma.5.0.mm.3D_glszm_ZoneEntropy                         | 0,882686 | 0,517486 | 0,743873 | n.s. |
| wavelet.HHH_gldm_GrayLevelNonUniformity                       | 0,878711 | 0,520236 | 0,744786 | n.s. |
| wavelet.LHL_firstorder_MeanAbsoluteDeviation                  | 0,875693 | 0,52233  | 0,746667 | n.s. |
| wavelet.LLL_glrlm_LongRunLowGrayLevelEmphasis                 | 0,875031 | 0,522791 | 0,746667 | n.s. |
| log.sigma.2.0.mm.3D_gldm_SmallDependenceLowGrayLevelEmphasis  | 0,868993 | 0,526997 | 0,751783 | n.s. |
| wavelet.HLL_glcm_lmc1                                         | 0,86745  | 0,528075 | 0,752429 | n.s. |
| original_glszm_ZoneEntropy                                    | 0,865711 | 0,529292 | 0,753271 | n.s. |
| wavelet.LLH_firstorder_Median                                 | 0,86103  | 0,532574 | 0,754288 | n.s. |
| wavelet.LLH_gldm_GrayLevelNonUniformity                       | 0,863716 | 0,530689 | 0,754288 | n.s. |
| wavelet.HHH_glcm_MaximumProbability                           | 0,861551 | 0,532208 | 0,754288 | n.s. |
| wavelet.HHH_glszm_SizeZoneNonUniformity                       | 0,86149  | 0,532251 | 0,754288 | n.s. |
| log.sigma.3.0.mm.3D_firstorder_10Percentile                   | 0,860226 | 0,533139 | 0,754288 | n.s. |
| wavelet.LLH_firstorder_90Percentile                           | 0,855726 | 0,536307 | 0,756991 | n.s. |
| wavelet.LHL_gldm_HighGrayLevelEmphasis                        | 0,855893 | 0,536189 | 0,756991 | n.s. |
| wavelet.HHH_glcm_DifferenceVariance                           | 0,854665 | 0,537055 | 0,75716  | n.s. |
| wavelet.LHH_glrlm_LowGrayLevelRunEmphasis                     | 0,851678 | 0,539166 | 0,759246 | n.s. |
| wavelet.LHL_firstorder_RobustMeanAbsoluteDeviation            | 0,850338 | 0,540114 | 0,759694 | n.s. |
| wavelet.HHH_gldm_LargeDependenceEmphasis                      | 0,845652 | 0,543437 | 0,763076 | n.s. |
| log.sigma.3.0.mm.3D_glszm_GrayLevelNonUniformity              | 0,844268 | 0,54442  | 0,763076 | n.s. |
| log.sigma.4.0.mm.3D_glszm_LargeAreaHighGrayLevelEmphasis      | 0,833325 | 0,543819 | 0,763076 | n.s. |
| wavelet.HHL_firstorder_RobustMeanAbsoluteDeviation            | 0,84123  | 0,546583 | 0,765216 | n.s. |
| wavelet.LLL_glrlm_LowGrayLevelRunEmphasis                     | 0,836843 | 0,549713 | 0,767812 | n.s. |
| log.sigma.3.0.mm.3D_glrlm_GrayLevelNonUniformity              | 0,837419 | 0,549301 | 0,767812 | n.s. |
| wavelet.HHL_glszm_GrayLevelNonUniformityNormalized            | 0,830668 | 0,554135 | 0,769583 | n.s. |
| wavelet.HHH_glszm_SmallAreaEmphasis                           | 0,830687 | 0,554121 | 0,769583 | n.s. |
| wavelet.LLL_glszm_SmallAreaEmphasis                           | 0,83061  | 0,554176 | 0,769583 | n.s. |
| log.sigma.2.0.mm.3D_gldm_LargeDependenceHighGrayLevelEmphasis | 0,833084 | 0,552402 | 0,769583 | n.s. |
| log.sigma.5.0.mm.3D_glszm_LowGrayLevelZoneEmphasis            | 0,83279  | 0,552613 | 0,769583 | n.s. |
| wavelet.LHH_glszm_LargeAreaHighGrayLevelEmphasis              | 0,827497 | 0,556413 | 0,771637 | n.s. |
| wavelet.HHH_gldm_GrayLevelVariance                            | 0,822397 | 0,560086 | 0,771637 | n.s. |

|                                                            |          |          |          |      |
|------------------------------------------------------------|----------|----------|----------|------|
| wavelet.LLL_glrlm_ShortRunLowGrayLevelEmphasis             | 0,82232  | 0,560142 | 0,771637 | n.s. |
| wavelet.LLL_gldm_LowGrayLevelEmphasis                      | 0,823449 | 0,559327 | 0,771637 | n.s. |
| log.sigma.1.0.mm.3D_glrlm_RunLengthNonUniformityNormalized | 0,823107 | 0,559574 | 0,771637 | n.s. |
| log.sigma.2.0.mm.3D_firstorder_RootMeanSquared             | 0,823313 | 0,559425 | 0,771637 | n.s. |
| log.sigma.5.0.mm.3D_glszm_SmallAreaLowGrayLevelEmphasis    | 0,822652 | 0,558831 | 0,771637 | n.s. |
| log.sigma.3.0.mm.3D_gldm_LargeDependenceEmphasis           | 0,818925 | 0,562594 | 0,774129 | n.s. |
| wavelet.HHL_firstorder_10Percentile                        | 0,8123   | 0,567395 | 0,775743 | n.s. |
| wavelet.HHL_gldm_Imc2                                      | 0,814179 | 0,566031 | 0,775743 | n.s. |
| wavelet.LLH_firstorder_Skewness                            | 0,797448 | 0,578228 | 0,775743 | n.s. |
| wavelet.LLH_glrlm_ShortRunEmphasis                         | 0,815221 | 0,565276 | 0,775743 | n.s. |
| wavelet.LLH_gldm_Id                                        | 0,800199 | 0,576214 | 0,775743 | n.s. |
| wavelet.LLH_gldm_Idmn                                      | 0,800199 | 0,576214 | 0,775743 | n.s. |
| wavelet.LLH_glszm_LowGrayLevelZoneEmphasis                 | 0,807498 | 0,570887 | 0,775743 | n.s. |
| wavelet.LHL_gldm_Autocorrelation                           | 0,800958 | 0,575659 | 0,775743 | n.s. |
| wavelet.LHL_glszm_SizeZoneNonUniformity                    | 0,806827 | 0,571375 | 0,775743 | n.s. |
| wavelet.LHL_glszm_ZoneEntropy                              | 0,799723 | 0,576562 | 0,775743 | n.s. |
| wavelet.LHH_glrlm_ShortRunLowGrayLevelEmphasis             | 0,79696  | 0,578586 | 0,775743 | n.s. |
| wavelet.HLH_glszm_SmallAreaLowGrayLevelEmphasis            | 0,803437 | 0,573848 | 0,775743 | n.s. |
| wavelet.HHH_glszm_SmallAreaHighGrayLevelEmphasis           | 0,809898 | 0,56914  | 0,775743 | n.s. |
| wavelet.LLL_glszm_SmallAreaLowGrayLevelEmphasis            | 0,813688 | 0,566387 | 0,775743 | n.s. |
| log.sigma.1.0.mm.3D_gldm_Contrast                          | 0,797608 | 0,578111 | 0,775743 | n.s. |
| log.sigma.2.0.mm.3D_firstorder_Mean                        | 0,806519 | 0,5716   | 0,775743 | n.s. |
| log.sigma.2.0.mm.3D_glrlm_LowGrayLevelRunEmphasis          | 0,805792 | 0,572129 | 0,775743 | n.s. |
| log.sigma.3.0.mm.3D_gldm_Id                                | 0,799272 | 0,576892 | 0,775743 | n.s. |
| log.sigma.3.0.mm.3D_gldm_DifferenceAverage                 | 0,799446 | 0,576765 | 0,775743 | n.s. |
| log.sigma.3.0.mm.3D_gldm_InverseVariance                   | 0,798989 | 0,577099 | 0,775743 | n.s. |
| log.sigma.3.0.mm.3D_gldm_Contrast                          | 0,799968 | 0,576383 | 0,775743 | n.s. |
| log.sigma.3.0.mm.3D_gldm_Idm                               | 0,799342 | 0,576841 | 0,775743 | n.s. |
| log.sigma.5.0.mm.3D_gldm_GrayLevelNonUniformity            | 0,797101 | 0,578482 | 0,775743 | n.s. |
| wavelet.LHL_glrlm_GrayLevelNonUniformityNormalized         | 0,790802 | 0,583106 | 0,777475 | n.s. |
| wavelet.LHL_gldm_ClusterTendency                           | 0,791324 | 0,582723 | 0,777475 | n.s. |
| wavelet.HLL_firstorder_Median                              | 0,792146 | 0,582118 | 0,777475 | n.s. |
| wavelet.HHH_gldm_DependenceNonUniformity                   | 0,793504 | 0,581121 | 0,777475 | n.s. |
| log.sigma.3.0.mm.3D_glrlm_RunPercentage                    | 0,791851 | 0,582335 | 0,777475 | n.s. |
| wavelet.LLH_glszm_SizeZoneNonUniformityNormalized          | 0,785252 | 0,587194 | 0,779182 | n.s. |
| wavelet.LHH_gldm_ClusterProminence                         | 0,784672 | 0,587622 | 0,779182 | n.s. |
| wavelet.HLH_gldm_MaximumProbability                        | 0,786934 | 0,585954 | 0,779182 | n.s. |
| log.sigma.2.0.mm.3D_glrlm_GrayLevelNonUniformity           | 0,786362 | 0,586376 | 0,779182 | n.s. |
| log.sigma.2.0.mm.3D_gldm_ClusterProminence                 | 0,786327 | 0,586401 | 0,779182 | n.s. |
| wavelet.LHH_glrlm_RunLengthNonUniformity                   | 0,781791 | 0,58975  | 0,779725 | n.s. |
| wavelet.LHH_gldm_JointAverage                              | 0,781487 | 0,589974 | 0,779725 | n.s. |
| wavelet.LHH_glszm_GrayLevelNonUniformityNormalized         | 0,78217  | 0,58947  | 0,779725 | n.s. |
| wavelet.LLH_glszm_GrayLevelNonUniformity                   | 0,77986  | 0,591178 | 0,780458 | n.s. |
| wavelet.LHH_gldm_Imc2                                      | 0,776644 | 0,593559 | 0,781888 | n.s. |
| log.sigma.1.0.mm.3D_glrlm_RunPercentage                    | 0,776993 | 0,593301 | 0,781888 | n.s. |
| wavelet.LLH_glszm_GrayLevelNonUniformityNormalized         | 0,77093  | 0,5978   | 0,784043 | n.s. |

|                                                              |          |          |          |      |
|--------------------------------------------------------------|----------|----------|----------|------|
| wavelet.HHH_glcmm_ClusterProminence                          | 0,771682 | 0,597242 | 0,784043 | n.s. |
| log.sigma.1.0.mm.3D_gldm_DependenceVariance                  | 0,773364 | 0,595992 | 0,784043 | n.s. |
| original_glrlm_ShortRunHighGrayLevelEmphasis                 | 0,771917 | 0,597067 | 0,784043 | n.s. |
| log.sigma.1.0.mm.3D_firstorder_10Percentile                  | 0,768683 | 0,599471 | 0,785379 | n.s. |
| wavelet.LHH_glcmm_MaximumProbability                         | 0,766871 | 0,60082  | 0,786291 | n.s. |
| log.sigma.4.0.mm.3D_glszm_LargeAreaEmphasis                  | 0,765185 | 0,602077 | 0,78708  | n.s. |
| wavelet.HHL_gldm_LargeDependenceHighGrayLevelEmphasis        | 0,760033 | 0,605922 | 0,791247 | n.s. |
| wavelet.LLH_firstorder_Range                                 | 0,757369 | 0,607914 | 0,792989 | n.s. |
| wavelet.LLH_glcmm_JointEnergy                                | 0,749612 | 0,613728 | 0,793115 | n.s. |
| wavelet.LLH_glcmm_ClusterProminence                          | 0,751537 | 0,612284 | 0,793115 | n.s. |
| wavelet.LLH_glszm_LargeAreaHighGrayLevelEmphasis             | 0,750273 | 0,613232 | 0,793115 | n.s. |
| wavelet.LHL_glcmm_DifferenceEntropy                          | 0,751709 | 0,612155 | 0,793115 | n.s. |
| wavelet.LHH_glcmm_InverseVariance                            | 0,748303 | 0,614711 | 0,793115 | n.s. |
| wavelet.LHH_glcmm_Autocorrelation                            | 0,748593 | 0,614493 | 0,793115 | n.s. |
| wavelet.LHH_glszm_SizeZoneNonUniformity                      | 0,752524 | 0,611543 | 0,793115 | n.s. |
| wavelet.HLH_firstorder_Range                                 | 0,747577 | 0,615257 | 0,793115 | n.s. |
| log.sigma.1.0.mm.3D_glcmm_DifferenceAverage                  | 0,75546  | 0,609343 | 0,793115 | n.s. |
| log.sigma.4.0.mm.3D_gldm_SmallDependenceEmphasis             | 0,755453 | 0,609348 | 0,793115 | n.s. |
| log.sigma.5.0.mm.3D_glrlm_ShortRunLowGrayLevelEmphasis       | 0,753908 | 0,610506 | 0,793115 | n.s. |
| original_gldm_DependenceEntropy                              | 0,745717 | 0,616655 | 0,794067 | n.s. |
| wavelet.LHH_glszm_GrayLevelVariance                          | 0,743236 | 0,618522 | 0,794772 | n.s. |
| wavelet.LHH_gldm_HighGrayLevelEmphasis                       | 0,743253 | 0,61851  | 0,794772 | n.s. |
| wavelet.HHH_firstorder_Energy                                | 0,734714 | 0,621604 | 0,796758 | n.s. |
| wavelet.HHH_firstorder_TotalEnergy                           | 0,734714 | 0,621604 | 0,796758 | n.s. |
| wavelet.LLL_glcmm_Idmn                                       | 0,738551 | 0,622053 | 0,796758 | n.s. |
| wavelet.LHL_gldm_LargeDependenceLowGrayLevelEmphasis         | 0,735905 | 0,624051 | 0,798467 | n.s. |
| log.sigma.5.0.mm.3D_glszm_ZoneVariance                       | 0,732498 | 0,626626 | 0,80091  | n.s. |
| wavelet.LHH_gldm_DependenceVariance                          | 0,731374 | 0,627476 | 0,801146 | n.s. |
| wavelet.HLL_glszm_SizeZoneNonUniformity                      | 0,724351 | 0,632796 | 0,806539 | n.s. |
| wavelet.LHH_glrlm_LongRunEmphasis                            | 0,723185 | 0,633681 | 0,806539 | n.s. |
| log.sigma.2.0.mm.3D_firstorder_RobustMeanAbsoluteDeviation   | 0,723148 | 0,633709 | 0,806539 | n.s. |
| wavelet.LHH_glcmm_Idmn                                       | 0,722215 | 0,634417 | 0,806588 | n.s. |
| log.sigma.3.0.mm.3D_glrlm_RunVariance                        | 0,719815 | 0,63624  | 0,808051 | n.s. |
| wavelet.LHH_glrlm_HighGrayLevelRunEmphasis                   | 0,71814  | 0,637513 | 0,808815 | n.s. |
| wavelet.LHH_gldm_DependenceEntropy                           | 0,715347 | 0,639637 | 0,809803 | n.s. |
| original_glrlm_HighGrayLevelRunEmphasis                      | 0,716228 | 0,638966 | 0,809803 | n.s. |
| original_gldm_HighGrayLevelEmphasis                          | 0,711505 | 0,642563 | 0,812653 | n.s. |
| log.sigma.2.0.mm.3D_glszm_ZonePercentage                     | 0,702975 | 0,64907  | 0,820021 | n.s. |
| wavelet.LLH_glcmm_Idm                                        | 0,701777 | 0,649985 | 0,820138 | n.s. |
| wavelet.LHL_firstorder_Uniformity                            | 0,696749 | 0,65383  | 0,820138 | n.s. |
| wavelet.LHH_firstorder_Mean                                  | 0,69751  | 0,653247 | 0,820138 | n.s. |
| wavelet.LLL_glcmm_Idn                                        | 0,693058 | 0,656655 | 0,820138 | n.s. |
| log.sigma.1.0.mm.3D_glcmm_Idm                                | 0,694104 | 0,655854 | 0,820138 | n.s. |
| log.sigma.1.0.mm.3D_gldm_LargeDependenceEmphasis             | 0,695971 | 0,654425 | 0,820138 | n.s. |
| log.sigma.1.0.mm.3D_gldm_SmallDependenceLowGrayLevelEmphasis | 0,693348 | 0,656433 | 0,820138 | n.s. |
| log.sigma.2.0.mm.3D_glrlm_ShortRunHighGrayLevelEmphasis      | 0,693499 | 0,656317 | 0,820138 | n.s. |

|                                                               |          |          |          |      |
|---------------------------------------------------------------|----------|----------|----------|------|
| log.sigma.4.0.mm.3D_glszm_LargeAreaLowGrayLevelEmphasis       | 0,700097 | 0,651269 | 0,820138 | n.s. |
| log.sigma.4.0.mm.3D_gldm_SmallDependenceHighGrayLevelEmphasis | 0,694563 | 0,655503 | 0,820138 | n.s. |
| original_glszm_SmallAreaEmphasis                              | 0,694471 | 0,655573 | 0,820138 | n.s. |
| original_glszm_SizeZoneNonUniformityNormalized                | 0,692117 | 0,657376 | 0,820188 | n.s. |
| log.sigma.1.0.mm.3D_glcm_Id                                   | 0,690412 | 0,658682 | 0,820966 | n.s. |
| wavelet.LLH_firstorder_MeanAbsoluteDeviation                  | 0,687025 | 0,66128  | 0,821115 | n.s. |
| wavelet.LLH_glrlm_RunLengthNonUniformityNormalized            | 0,679592 | 0,666985 | 0,821115 | n.s. |
| wavelet.LLH_gldm_SmallDependenceEmphasis                      | 0,679601 | 0,666978 | 0,821115 | n.s. |
| wavelet.LLH_gldm_DependenceEntropy                            | 0,6838   | 0,663754 | 0,821115 | n.s. |
| wavelet.LHH_firstorder_Energy                                 | 0,681713 | 0,66446  | 0,821115 | n.s. |
| wavelet.LHH_firstorder_RootMeanSquared                        | 0,686956 | 0,661332 | 0,821115 | n.s. |
| wavelet.LHH_firstorder_TotalEnergy                            | 0,681713 | 0,66446  | 0,821115 | n.s. |
| wavelet.HLH_glszm_GrayLevelVariance                           | 0,681725 | 0,665347 | 0,821115 | n.s. |
| log.sigma.2.0.mm.3D_firstorder_Median                         | 0,680761 | 0,666088 | 0,821115 | n.s. |
| log.sigma.4.0.mm.3D_firstorder_Median                         | 0,680003 | 0,666669 | 0,821115 | n.s. |
| original_glcm_Autocorrelation                                 | 0,684007 | 0,663595 | 0,821115 | n.s. |
| original_gldm_SmallDependenceEmphasis                         | 0,681787 | 0,665299 | 0,821115 | n.s. |
| log.sigma.1.0.mm.3D_firstorder_Kurtosis                       | 0,677461 | 0,668497 | 0,822135 | n.s. |
| wavelet.LHH_glcm_ClusterTendency                              | 0,673242 | 0,671867 | 0,825436 | n.s. |
| original_gldm_LargeDependenceHighGrayLevelEmphasis            | 0,671448 | 0,673247 | 0,826288 | n.s. |
| wavelet.HLH_glszm_LargeAreaEmphasis                           | 0,665867 | 0,677542 | 0,828225 | n.s. |
| wavelet.HHH_glrlm_GrayLevelNonUniformityNormalized            | 0,66493  | 0,678264 | 0,828225 | n.s. |
| log.sigma.3.0.mm.3D_glrlm_RunLengthNonUniformityNormalized    | 0,667713 | 0,676121 | 0,828225 | n.s. |
| log.sigma.3.0.mm.3D_glszm_GrayLevelNonUniformityNormalized    | 0,665103 | 0,678131 | 0,828225 | n.s. |
| original_gldm_SmallDependenceLowGrayLevelEmphasis             | 0,666651 | 0,676939 | 0,828225 | n.s. |
| wavelet.LLH_firstorder_Variance                               | 0,657622 | 0,683896 | 0,829215 | n.s. |
| wavelet.HLL_glszm_SmallAreaHighGrayLevelEmphasis              | 0,659105 | 0,682752 | 0,829215 | n.s. |
| wavelet.LHH_glrlm_ShortRunHighGrayLevelEmphasis               | 0,660757 | 0,681479 | 0,829215 | n.s. |
| wavelet.LHH_glszm_HighGrayLevelZoneEmphasis                   | 0,658918 | 0,682897 | 0,829215 | n.s. |
| wavelet.HHH_glcm_DifferenceEntropy                            | 0,659851 | 0,682177 | 0,829215 | n.s. |
| wavelet.HHH_glszm_LowGrayLevelZoneEmphasis                    | 0,658555 | 0,683176 | 0,829215 | n.s. |
| wavelet.LLL_glcm_ClusterShade                                 | 0,658211 | 0,683441 | 0,829215 | n.s. |
| wavelet.HHL_glcm_Idmn                                         | 0,654889 | 0,686003 | 0,830098 | n.s. |
| log.sigma.2.0.mm.3D_firstorder_Minimum                        | 0,655443 | 0,685576 | 0,830098 | n.s. |
| wavelet.LLH_glrlm_RunEntropy                                  | 0,651255 | 0,688805 | 0,830178 | n.s. |
| wavelet.LLH_gldm_SmallDependenceHighGrayLevelEmphasis         | 0,649739 | 0,689975 | 0,830178 | n.s. |
| wavelet.LHL_glcm_InverseVariance                              | 0,652057 | 0,688187 | 0,830178 | n.s. |
| wavelet.LHH_glcm_Correlation                                  | 0,649439 | 0,690206 | 0,830178 | n.s. |
| wavelet.HLH_firstorder_Maximum                                | 0,650388 | 0,689474 | 0,830178 | n.s. |
| log.sigma.2.0.mm.3D_glcm_JointAverage                         | 0,652936 | 0,687509 | 0,830178 | n.s. |
| wavelet.LHH_glrlm_GrayLevelNonUniformity                      | 0,648344 | 0,691051 | 0,830365 | n.s. |
| wavelet.HLL_glcm_ClusterShade                                 | 0,645381 | 0,693338 | 0,832282 | n.s. |
| wavelet.HHL_glrlm_RunLengthNonUniformity                      | 0,642737 | 0,695378 | 0,8339   | n.s. |
| wavelet.HLH_gldm_DependenceEntropy                            | 0,63919  | 0,698116 | 0,834095 | n.s. |
| log.sigma.1.0.mm.3D_glszm_GrayLevelNonUniformity              | 0,641528 | 0,696311 | 0,834095 | n.s. |
| log.sigma.4.0.mm.3D_glrlm_GrayLevelNonUniformity              | 0,638937 | 0,698312 | 0,834095 | n.s. |

|                                                           |          |          |          |      |
|-----------------------------------------------------------|----------|----------|----------|------|
| original_glcm_Idn                                         | 0,640292 | 0,697265 | 0,834095 | n.s. |
| original_glcm_Imc1                                        | 0,637272 | 0,699597 | 0,834802 | n.s. |
| wavelet.LHL_firstorder_Energy                             | 0,630344 | 0,706141 | 0,838971 | n.s. |
| wavelet.LHL_firstorder_TotalEnergy                        | 0,630344 | 0,706141 | 0,838971 | n.s. |
| wavelet.LHH_firstorder_InterquartileRange                 | 0,628278 | 0,70654  | 0,838971 | n.s. |
| wavelet.HHH_firstorder_Skewness                           | 0,627977 | 0,706917 | 0,838971 | n.s. |
| log.sigma.2.0.mm.3D_firstorder_10Percentile               | 0,631168 | 0,704309 | 0,838971 | n.s. |
| log.sigma.2.0.mm.3D_gldm_HighGrayLevelEmphasis            | 0,62733  | 0,707272 | 0,838971 | n.s. |
| wavelet.HHL_glcm_Idn                                      | 0,625138 | 0,708964 | 0,839975 | n.s. |
| wavelet.LLH_gldm_SmallDependenceLowGrayLevelEmphasis      | 0,623523 | 0,710211 | 0,839975 | n.s. |
| wavelet.LHL_firstorder_Median                             | 0,623711 | 0,710066 | 0,839975 | n.s. |
| wavelet.HLH_firstorder_Median                             | 0,618994 | 0,713707 | 0,843281 | n.s. |
| wavelet.HHL_gldm_DependenceVariance                       | 0,616928 | 0,715302 | 0,844337 | n.s. |
| wavelet.HHH_gldm_RunPercentage                            | 0,613926 | 0,717618 | 0,845589 | n.s. |
| log.sigma.2.0.mm.3D_glcm_Idn                              | 0,613732 | 0,717767 | 0,845589 | n.s. |
| wavelet.LLL_glcm_Correlation                              | 0,607036 | 0,722931 | 0,850769 | n.s. |
| log.sigma.5.0.mm.3D_glszm_SmallAreaHighGrayLevelEmphasis  | 0,606198 | 0,723578 | 0,850769 | n.s. |
| log.sigma.2.0.mm.3D_gldm_HighGrayLevelRunEmphasis         | 0,605004 | 0,724498 | 0,851021 | n.s. |
| wavelet.LLH_glcm_ClusterTendency                          | 0,604061 | 0,725225 | 0,851044 | n.s. |
| wavelet.LHL_firstorder_Mean                               | 0,601038 | 0,727554 | 0,852945 | n.s. |
| wavelet.HHH_gldm_GrayLevelNonUniformity                   | 0,593001 | 0,733742 | 0,859363 | n.s. |
| log.sigma.2.0.mm.3D_glcm_Autocorrelation                  | 0,591918 | 0,734575 | 0,859502 | n.s. |
| wavelet.LLH_glcm_SumSquares                               | 0,586931 | 0,738409 | 0,862313 | n.s. |
| wavelet.LHH_gldm_DependenceNonUniformity                  | 0,587016 | 0,738343 | 0,862313 | n.s. |
| original_gldm_LongRunHighGrayLevelEmphasis                | 0,584613 | 0,74019  | 0,863554 | n.s. |
| log.sigma.2.0.mm.3D_gldm_ShortRunLowGrayLevelEmphasis     | 0,581625 | 0,742484 | 0,865392 | n.s. |
| wavelet.LLH_firstorder_10Percentile                       | 0,576278 | 0,746584 | 0,86933  | n.s. |
| wavelet.LLH_gldm_GrayLevelNonUniformity                   | 0,574352 | 0,748059 | 0,869394 | n.s. |
| wavelet.LLH_glcm_SumEntropy                               | 0,564584 | 0,75553  | 0,869394 | n.s. |
| wavelet.LLH_glcm_DifferenceAverage                        | 0,569418 | 0,751836 | 0,869394 | n.s. |
| wavelet.LLH_glszm_HighGrayLevelZoneEmphasis               | 0,572149 | 0,749746 | 0,869394 | n.s. |
| wavelet.LHL_glcm_JointEnergy                              | 0,570602 | 0,75093  | 0,869394 | n.s. |
| wavelet.LHH_glcm_Idn                                      | 0,568358 | 0,752646 | 0,869394 | n.s. |
| wavelet.HLH_glcm_ClusterShade                             | 0,566032 | 0,754844 | 0,869394 | n.s. |
| wavelet.HHH_glcm_JointEntropy                             | 0,563934 | 0,756026 | 0,869394 | n.s. |
| wavelet.LLL_glcm_Imc1                                     | 0,566548 | 0,75403  | 0,869394 | n.s. |
| log.sigma.1.0.mm.3D_firstorder_Energy                     | 0,568515 | 0,755758 | 0,869394 | n.s. |
| log.sigma.1.0.mm.3D_firstorder_TotalEnergy                | 0,568515 | 0,755758 | 0,869394 | n.s. |
| log.sigma.2.0.mm.3D_glszm_SizeZoneNonUniformityNormalized | 0,564619 | 0,755503 | 0,869394 | n.s. |
| log.sigma.3.0.mm.3D_glszm_SizeZoneNonUniformity           | 0,567624 | 0,753207 | 0,869394 | n.s. |
| wavelet.LLH_firstorder_Maximum                            | 0,556241 | 0,761891 | 0,869873 | n.s. |
| wavelet.LHL_firstorder_10Percentile                       | 0,559523 | 0,759391 | 0,869873 | n.s. |
| wavelet.LHH_glszm_ZonePercentage                          | 0,556993 | 0,761318 | 0,869873 | n.s. |
| log.sigma.2.0.mm.3D_firstorder_InterquartileRange         | 0,562151 | 0,757387 | 0,869873 | n.s. |
| log.sigma.2.0.mm.3D_glcm_Idmn                             | 0,556496 | 0,761697 | 0,869873 | n.s. |
| log.sigma.5.0.mm.3D_gldm_DependenceNonUniformity          | 0,555805 | 0,762223 | 0,869873 | n.s. |

|                                                         |          |          |          |      |
|---------------------------------------------------------|----------|----------|----------|------|
| original_glszm_ZonePercentage                           | 0,555849 | 0,76219  | 0,869873 | n.s. |
| original_gldm_DependenceNonUniformityNormalized         | 0,560454 | 0,758681 | 0,869873 | n.s. |
| wavelet.LLH_glszm_LargeAreaLowGrayLevelEmphasis         | 0,553048 | 0,76432  | 0,87144  | n.s. |
| wavelet.LHL_glcm_JointEntropy                           | 0,548535 | 0,767748 | 0,872187 | n.s. |
| wavelet.LHL_glcm_SumEntropy                             | 0,550236 | 0,766457 | 0,872187 | n.s. |
| wavelet.LHH_glszm_SmallAreaEmphasis                     | 0,550144 | 0,766527 | 0,872187 | n.s. |
| wavelet.HHH_gldm_SmallDependenceLowGrayLevelEmphasis    | 0,548371 | 0,767872 | 0,872187 | n.s. |
| wavelet.LLH_firstorder_Minimum                          | 0,540505 | 0,77383  | 0,874197 | n.s. |
| wavelet.LLH_glrlm_ShortRunLowGrayLevelEmphasis          | 0,543148 | 0,77183  | 0,874197 | n.s. |
| wavelet.LLH_glcm_JointEntropy                           | 0,539729 | 0,774417 | 0,874197 | n.s. |
| wavelet.LLH_glcm_Contrast                               | 0,538798 | 0,77512  | 0,874197 | n.s. |
| wavelet.LHH_firstorder_RobustMeanAbsoluteDeviation      | 0,536437 | 0,776902 | 0,874197 | n.s. |
| wavelet.HLH_glrlm_RunEntropy                            | 0,536901 | 0,776552 | 0,874197 | n.s. |
| log.sigma.1.0.mm.3D_glszm_SmallAreaLowGrayLevelEmphasis | 0,536436 | 0,776903 | 0,874197 | n.s. |
| log.sigma.4.0.mm.3D_glszm_ZonePercentage                | 0,542091 | 0,77263  | 0,874197 | n.s. |
| log.sigma.5.0.mm.3D_firstorder_Maximum                  | 0,543925 | 0,771243 | 0,874197 | n.s. |
| original_gldm_LargeDependenceLowGrayLevelEmphasis       | 0,541103 | 0,773378 | 0,874197 | n.s. |
| wavelet.HHL_firstorder_RootMeanSquared                  | 0,531298 | 0,780774 | 0,877321 | n.s. |
| wavelet.LLH_gldm_LargeDependenceHighGrayLevelEmphasis   | 0,529503 | 0,782124 | 0,877321 | n.s. |
| wavelet.LHH_firstorder_Variance                         | 0,529282 | 0,78229  | 0,877321 | n.s. |
| wavelet.HHH_firstorder_Range                            | 0,528878 | 0,782593 | 0,877321 | n.s. |
| wavelet.LHL_firstorder_RootMeanSquared                  | 0,526174 | 0,784624 | 0,878778 | n.s. |
| wavelet.LLH_glrlm_LowGrayLevelRunEmphasis               | 0,524052 | 0,786215 | 0,879742 | n.s. |
| log.sigma.5.0.mm.3D_firstorder_Kurtosis                 | 0,518762 | 0,790171 | 0,883349 | n.s. |
| original_glcm_JointAverage                              | 0,516821 | 0,79162  | 0,884147 | n.s. |
| wavelet.LLH_gldm_LargeDependenceLowGrayLevelEmphasis    | 0,507128 | 0,798827 | 0,888077 | n.s. |
| wavelet.HLH_gldm_DependenceNonUniformityNormalized      | 0,507652 | 0,798439 | 0,888077 | n.s. |
| wavelet.HHH_firstorder_Uniformity                       | 0,508068 | 0,79813  | 0,888077 | n.s. |
| log.sigma.4.0.mm.3D_firstorder_Energy                   | 0,515452 | 0,797124 | 0,888077 | n.s. |
| log.sigma.4.0.mm.3D_firstorder_TotalEnergy              | 0,515452 | 0,797124 | 0,888077 | n.s. |
| wavelet.LLH_gldm_LowGrayLevelEmphasis                   | 0,503538 | 0,801484 | 0,890209 | n.s. |
| wavelet.LHH_firstorder_MeanAbsoluteDeviation            | 0,501917 | 0,802681 | 0,890717 | n.s. |
| wavelet.LLH_glrlm_LongRunLowGrayLevelEmphasis           | 0,500088 | 0,80403  | 0,890742 | n.s. |
| wavelet.LHH_glcm_SumSquares                             | 0,49988  | 0,804183 | 0,890742 | n.s. |
| wavelet.HHL_gldm_DependenceNonUniformity                | 0,496671 | 0,806546 | 0,892277 | n.s. |
| wavelet.HHL_gldm_SmallDependenceLowGrayLevelEmphasis    | 0,493762 | 0,808682 | 0,892277 | n.s. |
| wavelet.HLL_firstorder_Maximum                          | 0,494868 | 0,80787  | 0,892277 | n.s. |
| wavelet.LLL_firstorder_Kurtosis                         | 0,494418 | 0,808837 | 0,892277 | n.s. |
| original_firstorder_Kurtosis                            | 0,493824 | 0,809274 | 0,892277 | n.s. |
| wavelet.HHL_firstorder_Mean                             | 0,491435 | 0,811029 | 0,893015 | n.s. |
| wavelet.HHH_glrlm_RunVariance                           | 0,490012 | 0,811428 | 0,893015 | n.s. |
| wavelet.LHH_glszm_SmallAreaHighGrayLevelEmphasis        | 0,486011 | 0,814348 | 0,89541  | n.s. |
| log.sigma.3.0.mm.3D_glcm_Idn                            | 0,480877 | 0,81808  | 0,898694 | n.s. |
| wavelet.HHL_firstorder_Skewness                         | 0,470673 | 0,825445 | 0,900263 | n.s. |
| wavelet.HHL_glszm_LargeAreaHighGrayLevelEmphasis        | 0,476101 | 0,821536 | 0,900263 | n.s. |
| wavelet.LLH_glszm_ZoneVariance                          | 0,472259 | 0,824305 | 0,900263 | n.s. |



|                                                              |          |          |          |      |
|--------------------------------------------------------------|----------|----------|----------|------|
| wavelet.LHL_firstorder_90Percentile                          | 0,473849 | 0,82316  | 0,900263 | n.s. |
| wavelet.HLL_firstorder_Skewness                              | 0,471651 | 0,824743 | 0,900263 | n.s. |
| wavelet.HHH_glcmm_SumEntropy                                 | 0,47061  | 0,82549  | 0,900263 | n.s. |
| log.sigma.2.0.mm.3D_glszm_LowGrayLevelZoneEmphasis           | 0,473007 | 0,823767 | 0,900263 | n.s. |
| log.sigma.4.0.mm.3D_glcmm_ClusterShade                       | 0,475895 | 0,821685 | 0,900263 | n.s. |
| wavelet.HHH_glcmm_Contrast                                   | 0,46103  | 0,832337 | 0,906908 | n.s. |
| log.sigma.4.0.mm.3D_firstorder_Mean                          | 0,459801 | 0,83321  | 0,907039 | n.s. |
| wavelet.LHL_glcmm_Correlation                                | 0,455268 | 0,836421 | 0,90718  | n.s. |
| wavelet.HHH_glcmm_InverseVariance                            | 0,454296 | 0,837107 | 0,90718  | n.s. |
| log.sigma.2.0.mm.3D_glszm_SmallAreaLowGrayLevelEmphasis      | 0,456405 | 0,835617 | 0,90718  | n.s. |
| log.sigma.3.0.mm.3D_gldm_SmallDependenceEmphasis             | 0,458221 | 0,834331 | 0,90718  | n.s. |
| log.sigma.4.0.mm.3D_firstorder_Minimum                       | 0,454566 | 0,836916 | 0,90718  | n.s. |
| log.sigma.4.0.mm.3D_firstorder_RootMeanSquared               | 0,452098 | 0,838656 | 0,908041 | n.s. |
| wavelet.LLH_glcmm_DifferenceVariance                         | 0,443182 | 0,844898 | 0,913912 | n.s. |
| wavelet.HHH_glcmm_Id                                         | 0,441403 | 0,846135 | 0,913912 | n.s. |
| wavelet.HHH_glcmm_DifferenceAverage                          | 0,439992 | 0,847115 | 0,913912 | n.s. |
| wavelet.HHH_glcmm_Idm                                        | 0,440267 | 0,846924 | 0,913912 | n.s. |
| wavelet.HHL_gldm_DependenceNonUniformityNormalized           | 0,437036 | 0,849161 | 0,915015 | n.s. |
| wavelet.LHH_gldm_SmallDependenceEmphasis                     | 0,436317 | 0,849657 | 0,915015 | n.s. |
| wavelet.LHH_glszm_GrayLevelNonUniformity                     | 0,433578 | 0,851545 | 0,916228 | n.s. |
| wavelet.HHL_firstorder_Kurtosis                              | 0,42009  | 0,860733 | 0,925215 | n.s. |
| wavelet.LLH_glcmm_Correlation                                | 0,417062 | 0,862771 | 0,925215 | n.s. |
| wavelet.HLH_glszm_SizeZoneNonUniformity                      | 0,417074 | 0,862763 | 0,925215 | n.s. |
| log.sigma.3.0.mm.3D_firstorder_Median                        | 0,416765 | 0,86297  | 0,925215 | n.s. |
| wavelet.LLH_glrIm_LongRunHighGrayLevelEmphasis               | 0,412191 | 0,86603  | 0,926074 | n.s. |
| wavelet.LHH_firstorder_10Percentile                          | 0,412998 | 0,865492 | 0,926074 | n.s. |
| wavelet.LHH_gldm_GrayLevelVariance                           | 0,412118 | 0,866079 | 0,926074 | n.s. |
| wavelet.HHH_glrIm_LongRunEmphasis                            | 0,407121 | 0,869396 | 0,928361 | n.s. |
| log.sigma.4.0.mm.3D_gldm_SmallDependenceLowGrayLevelEmphasis | 0,40657  | 0,86976  | 0,928361 | n.s. |
| wavelet.LHH_gldm_SmallDependenceHighGrayLevelEmphasis        | 0,398723 | 0,874909 | 0,933029 | n.s. |
| wavelet.HLH_gldm_DependenceVariance                          | 0,396408 | 0,876415 | 0,933809 | n.s. |
| wavelet.LHH_glcmm_SumEntropy                                 | 0,393394 | 0,878367 | 0,934234 | n.s. |
| original_glcmm_InverseVariance                               | 0,394372 | 0,877734 | 0,934234 | n.s. |
| original_glszm_LowGrayLevelZoneEmphasis                      | 0,386499 | 0,882791 | 0,938111 | n.s. |
| wavelet.LLH_gldm_GrayLevelVariance                           | 0,384567 | 0,88402  | 0,938589 | n.s. |
| wavelet.LLH_glszm_LargeAreaEmphasis                          | 0,382208 | 0,885515 | 0,939348 | n.s. |
| wavelet.LHH_firstorder_90Percentile                          | 0,373567 | 0,890933 | 0,942719 | n.s. |
| wavelet.LHH_glcmm_Contrast                                   | 0,374602 | 0,890289 | 0,942719 | n.s. |
| log.sigma.2.0.mm.3D_glcmm_lmc2                               | 0,371885 | 0,891977 | 0,942719 | n.s. |
| log.sigma.3.0.mm.3D_glszm_LowGrayLevelZoneEmphasis           | 0,37154  | 0,89219  | 0,942719 | n.s. |
| log.sigma.5.0.mm.3D_firstorder_90Percentile                  | 0,370864 | 0,892608 | 0,942719 | n.s. |
| wavelet.LLH_glrIm_GrayLevelVariance                          | 0,366751 | 0,895139 | 0,943575 | n.s. |
| wavelet.HLL_firstorder_Energy                                | 0,374288 | 0,895769 | 0,943575 | n.s. |
| wavelet.HLL_firstorder_TotalEnergy                           | 0,374288 | 0,895769 | 0,943575 | n.s. |
| log.sigma.3.0.mm.3D_gldm_SmallDependenceLowGrayLevelEmphasis | 0,358246 | 0,900302 | 0,94752  | n.s. |
| original_glrIm_ShortRunLowGrayLevelEmphasis                  | 0,35345  | 0,903169 | 0,949708 | n.s. |

|                                                           |          |          |          |      |
|-----------------------------------------------------------|----------|----------|----------|------|
| log.sigma.4.0.mm.3D_glcm_Correlation                      | 0,349671 | 0,905406 | 0,951229 | n.s. |
| wavelet.LLH_glcm_Autocorrelation                          | 0,345723 | 0,907721 | 0,952    | n.s. |
| log.sigma.3.0.mm.3D_firstorder_Mean                       | 0,346944 | 0,907007 | 0,952    | n.s. |
| wavelet.LLH_glrlm_HighGrayLevelRunEmphasis                | 0,337513 | 0,912463 | 0,95284  | n.s. |
| wavelet.LLH_glrlm_ShortRunHighGrayLevelEmphasis           | 0,337486 | 0,912478 | 0,95284  | n.s. |
| wavelet.LHH_firstorder_Uniformity                         | 0,337766 | 0,912318 | 0,95284  | n.s. |
| log.sigma.3.0.mm.3D_firstorder_RootMeanSquared            | 0,342296 | 0,909713 | 0,95284  | n.s. |
| original_glrlm_LongRunLowGrayLevelEmphasis                | 0,340865 | 0,910539 | 0,95284  | n.s. |
| wavelet.HHL_firstorder_Median                             | 0,332026 | 0,916239 | 0,953308 | n.s. |
| wavelet.LLH_gldm_HighGrayLevelEmphasis                    | 0,331671 | 0,915776 | 0,953308 | n.s. |
| log.sigma.3.0.mm.3D_gldm_DependenceVariance               | 0,329693 | 0,916886 | 0,953308 | n.s. |
| log.sigma.4.0.mm.3D_glszm_GrayLevelNonUniformity          | 0,334269 | 0,914309 | 0,953308 | n.s. |
| original_glrlm_LowGrayLevelRunEmphasis                    | 0,331225 | 0,916027 | 0,953308 | n.s. |
| wavelet.HHL_firstorder_Minimum                            | 0,320084 | 0,922192 | 0,953615 | n.s. |
| wavelet.LLH_glszm_SizeZoneNonUniformity                   | 0,326176 | 0,918845 | 0,953615 | n.s. |
| wavelet.LLH_glszm_ZonePercentage                          | 0,318088 | 0,923276 | 0,953615 | n.s. |
| wavelet.LHH_glrlm_GrayLevelVariance                       | 0,31995  | 0,922265 | 0,953615 | n.s. |
| wavelet.HHH_glcm_Correlation                              | 0,319181 | 0,922683 | 0,953615 | n.s. |
| log.sigma.4.0.mm.3D_glszm_HighGrayLevelZoneEmphasis       | 0,3228   | 0,920707 | 0,953615 | n.s. |
| log.sigma.4.0.mm.3D_glszm_SizeZoneNonUniformityNormalized | 0,322779 | 0,920718 | 0,953615 | n.s. |
| original_gldm_LowGrayLevelEmphasis                        | 0,317642 | 0,923518 | 0,953615 | n.s. |
| wavelet.LHH_glcm_DifferenceVariance                       | 0,313433 | 0,925779 | 0,954092 | n.s. |
| wavelet.LHH_glszm_SizeZoneNonUniformityNormalized         | 0,312768 | 0,926134 | 0,954092 | n.s. |
| wavelet.HHH_firstorder_Minimum                            | 0,31235  | 0,926356 | 0,954092 | n.s. |
| wavelet.LHH_glrlm_RunEntropy                              | 0,298781 | 0,933424 | 0,959728 | n.s. |
| wavelet.HHH_glcm_ClusterTendency                          | 0,299304 | 0,933157 | 0,959728 | n.s. |
| wavelet.LHH_glcm_JointEnergy                              | 0,28969  | 0,937983 | 0,963594 | n.s. |
| wavelet.LLH_firstorder_Uniformity                         | 0,285671 | 0,939953 | 0,964244 | n.s. |
| log.sigma.3.0.mm.3D_glcm_Idmn                             | 0,285127 | 0,940218 | 0,964244 | n.s. |
| wavelet.LLH_glcm_DifferenceEntropy                        | 0,275377 | 0,944866 | 0,967952 | n.s. |
| wavelet.LLH_glcm_JointAverage                             | 0,274143 | 0,945442 | 0,967952 | n.s. |
| log.sigma.4.0.mm.3D_gldm_DependenceVariance               | 0,267337 | 0,948568 | 0,970328 | n.s. |
| wavelet.LLH_firstorder_Entropy                            | 0,258126 | 0,952661 | 0,973688 | n.s. |
| wavelet.LHH_glrlm_GrayLevelNonUniformityNormalized        | 0,252085 | 0,955258 | 0,975447 | n.s. |
| wavelet.LHH_glcm_JointEntropy                             | 0,24958  | 0,956313 | 0,975447 | n.s. |
| wavelet.LHH_glcm_DifferenceAverage                        | 0,248383 | 0,956813 | 0,975447 | n.s. |
| log.sigma.4.0.mm.3D_glszm_ZoneEntropy                     | 0,245434 | 0,958034 | 0,975866 | n.s. |
| wavelet.LLH_glrlm_GrayLevelNonUniformityNormalized        | 0,23926  | 0,960534 | 0,977584 | n.s. |
| wavelet.LHH_firstorder_Entropy                            | 0,230552 | 0,96393  | 0,980213 | n.s. |
| log.sigma.2.0.mm.3D_glcm_Correlation                      | 0,223351 | 0,966623 | 0,982122 | n.s. |
| wavelet.HLL_firstorder_Kurtosis                           | 0,21208  | 0,970624 | 0,982869 | n.s. |
| log.sigma.1.0.mm.3D_glcm_InverseVariance                  | 0,219018 | 0,968192 | 0,982869 | n.s. |
| log.sigma.5.0.mm.3D_firstorder_Energy                     | 0,221483 | 0,97004  | 0,982869 | n.s. |
| log.sigma.5.0.mm.3D_firstorder_TotalEnergy                | 0,221483 | 0,97004  | 0,982869 | n.s. |
| log.sigma.2.0.mm.3D_glcm_Imc1                             | 0,203968 | 0,973341 | 0,984793 | n.s. |
| wavelet.LHH_glrlm_RunPercentage                           | 0,189265 | 0,977914 | 0,988493 | n.s. |

|                                                    |          |          |          |      |
|----------------------------------------------------|----------|----------|----------|------|
| wavelet.LHH_glrIm_RunLengthNonUniformityNormalized | 0,183922 | 0,979462 | 0,988493 | n.s. |
| wavelet.LHH_glcm_Idm                               | 0,186105 | 0,978837 | 0,988493 | n.s. |
| wavelet.LHL_gldm_DependenceEntropy                 | 0,173022 | 0,982432 | 0,988937 | n.s. |
| wavelet.LHH_glrIm_ShortRunEmphasis                 | 0,174323 | 0,982091 | 0,988937 | n.s. |
| wavelet.LHH_glcm_Id                                | 0,167357 | 0,983876 | 0,988937 | n.s. |
| wavelet.LHH_gldm_LargeDependenceEmphasis           | 0,177686 | 0,981192 | 0,988937 | n.s. |
| log.sigma.4.0.mm.3D_firstorder_90Percentile        | 0,164083 | 0,98468  | 0,988937 | n.s. |
| log.sigma.4.0.mm.3D_glszm_LowGrayLevelZoneEmphasis | 0,16346  | 0,98483  | 0,988937 | n.s. |
| wavelet.LHH_glcm_DifferenceEntropy                 | 0,119228 | 0,993421 | 0,996733 | n.s. |
| wavelet.HHL_firstorder_Energy                      | 0,099165 | 0,996483 | 0,998141 | n.s. |
| wavelet.HHL_firstorder_TotalEnergy                 | 0,099165 | 0,996483 | 0,998141 | n.s. |
| wavelet.LHL_glszm_GrayLevelNonUniformity           | 0,045397 | 0,999561 | 0,999561 | n.s. |
| log.sigma.2.0.mm.3D_firstorder_Kurtosis            | 0,054878 | 0,999244 | 0,999561 | n.s. |
